# Supplementary material
Source: PubMed Central journal article supplement (PMC6644939)
Supplement: ao7b01004_si_001.pdf [file ao7b01004_si_001.pdf]

## Supporting information

### Energetics of Saddling Versus Ruffling in Metalloporphyrins: Unusual Ruffled Dodecasubstituted Porphyrins

Jeanet Conradie\*<sup>a,b</sup> and Abhik Ghosh\*<sup>a</sup>

<sup>a</sup>Department of Chemistry and Center for Theoretical and Computational Chemistry,  
UiT – The Arctic University of Norway, N-9037 Tromsø, Norway;

<sup>b</sup>Department of Chemistry, University of the Free State, 9300 Bloemfontein,  
Republic of South Africa

Email: conradj@ufs.ac.za (JC), abhik.ghosh@uit.no [AG]

#### Table of Contents

|                                                                                                                                                                                                                                                            |    |
|------------------------------------------------------------------------------------------------------------------------------------------------------------------------------------------------------------------------------------------------------------|----|
| <b>Table of Contents</b> .....                                                                                                                                                                                                                             | 1  |
| Table S1. Experimental structural data for selected saddled porphyrins: average M-N distances (Å), saddled angles ( $\chi$ , deg), and $\alpha$ and $\beta$ carbon displacement (Å) above the N <sub>4</sub> plane, along with respective CCSD codes. .... | 4  |
| Table S2. Total energies for the indicated dodecasubstituted metalloporphyrins. ....                                                                                                                                                                       | 5  |
| Table S3. Total energies and zero-point vibrational energies for MTPP. ....                                                                                                                                                                                | 7  |
| Optimized coordinates .....                                                                                                                                                                                                                                | 8  |
| 1. Cu(DPP); S = ½ (saddled) .....                                                                                                                                                                                                                          | 8  |
| 2. Cu(DPP); S = ½ (ruffled) .....                                                                                                                                                                                                                          | 11 |
| 3. Ni(DPP); S = 0 (saddled) .....                                                                                                                                                                                                                          | 14 |
| 4. Ni(DPP); S = 0 (ruffled) .....                                                                                                                                                                                                                          | 17 |
| 5. Pd(DPP); S = 0 (saddled) .....                                                                                                                                                                                                                          | 20 |
| 6. Pd(DPP); S = 0 (ruffled) .....                                                                                                                                                                                                                          | 23 |
| 7. Pt(DPP); S = 0 (saddled) .....                                                                                                                                                                                                                          | 27 |
| 8. Pt(DPP); S = 0 (ruffled) .....                                                                                                                                                                                                                          | 30 |
| 9. Zn(DPP); S = 0 (saddled) .....                                                                                                                                                                                                                          | 33 |
| 10. Zn(DPP); S = 0 (ruffled) .....                                                                                                                                                                                                                         | 36 |
| 11. Cu[Br <sub>8</sub> TPP]; S = ½ (saddled) .....                                                                                                                                                                                                         | 39 |

|     |                                                          |     |
|-----|----------------------------------------------------------|-----|
| 12. | Cu[Br <sub>8</sub> TPP]; S = ½ (ruffled)                 | 41  |
| 13. | Ni[Br <sub>8</sub> TPP]; S = 0 (saddled)                 | 42  |
| 14. | Ni[Br <sub>8</sub> TPP]; S = 0 (ruffled)                 | 44  |
| 15. | Pd[Br <sub>8</sub> TPP]; S = 0 (saddled)                 | 46  |
| 16. | Pd[Br <sub>8</sub> TPP]; S = 0 (ruffled)                 | 47  |
| 17. | Pt[Br <sub>8</sub> TPP]; S = 0 (saddled)                 | 49  |
| 18. | Pt[Br <sub>8</sub> TPP]; S = 0 (ruffled)                 | 50  |
| 19. | Zn[Br <sub>8</sub> TPP]; S = 0 (saddled)                 | 52  |
| 20. | Zn[Br <sub>8</sub> TPP]; S = 0 (ruffled)                 | 54  |
| 21. | Cu[Cl <sub>8</sub> TPP]; S = ½ (saddled)                 | 55  |
| 22. | Cu[Cl <sub>8</sub> TPP]; S = ½ (ruffled)                 | 57  |
| 23. | Ni[Cl <sub>8</sub> TPP]; S = 0 (saddled)                 | 58  |
| 24. | Ni[Cl <sub>8</sub> TPP]; S = 0 (ruffled)                 | 60  |
| 25. | Pd[Cl <sub>8</sub> TPP]; S = 0 (saddled)                 | 62  |
| 26. | Pd[Cl <sub>8</sub> TPP]; S = 0 (ruffled)                 | 63  |
| 27. | Pt[Cl <sub>8</sub> TPP]; S = 0 (saddled)                 | 65  |
| 28. | Pt[Cl <sub>8</sub> TPP]; S = 0 (ruffled)                 | 66  |
| 29. | Zn[Cl <sub>8</sub> TPP]; S = 0 (saddled)                 | 68  |
| 30. | Zn[Cl <sub>8</sub> TPP]; S = 0 (ruffled)                 | 70  |
| 31. | Cu[(CF <sub>3</sub> ) <sub>8</sub> TPP]; S = ½ (saddled) | 71  |
| 32. | Cu[(CF <sub>3</sub> ) <sub>8</sub> TPP]; S = ½ (ruffled) | 73  |
| 33. | Ni[(CF <sub>3</sub> ) <sub>8</sub> TPP]; S = 0 (saddled) | 75  |
| 34. | Ni[(CF <sub>3</sub> ) <sub>8</sub> TPP]; S = 0 (ruffled) | 77  |
| 35. | Pd[(CF <sub>3</sub> ) <sub>8</sub> TPP]; S = 0 (saddled) | 79  |
| 36. | Pd[(CF <sub>3</sub> ) <sub>8</sub> TPP]; S = 0 (ruffled) | 81  |
| 37. | Pt[(CF <sub>3</sub> ) <sub>8</sub> TPP]; S = 0 (saddled) | 84  |
| 38. | Pt[(CF <sub>3</sub> ) <sub>8</sub> TPP]; S = 0 (ruffled) | 86  |
| 39. | Zn[(CF <sub>3</sub> ) <sub>8</sub> TPP]; S = 0 (saddled) | 88  |
| 40. | Zn[(CF <sub>3</sub> ) <sub>8</sub> TPP]; S = 0 (ruffled) | 90  |
| 41. | Cu[Me <sub>8</sub> TPP]; S = ½ (saddled)                 | 92  |
| 42. | Cu[Me <sub>8</sub> TPP]; S = ½ (ruffled)                 | 94  |
| 43. | Ni[Me <sub>8</sub> TPP]; S = 0 (saddled)                 | 96  |
| 44. | Ni[Me <sub>8</sub> TPP]; S = 0 (ruffled)                 | 98  |
| 45. | Pd[Me <sub>8</sub> TPP]; S = 0 (saddled)                 | 100 |
| 46. | Pd[Me <sub>8</sub> TPP]; S = 0 (ruffled)                 | 102 |
| 47. | Pt[Me <sub>8</sub> TPP]; S = 0 (saddled)                 | 104 |
| 48. | Pt[Me <sub>8</sub> TPP]; S = 0 (ruffled)                 | 106 |
| 49. | Zn[Me <sub>8</sub> TPP]; S = 0 (saddled)                 | 108 |
| 50. | Zn[Me <sub>8</sub> TPP]; S = 0 (ruffled)                 | 110 |
| 51. | Cu[A <sub>4</sub> Br <sub>8</sub> ]; S = ½ (saddled)     | 112 |
| 52. | Cu[A <sub>4</sub> Br <sub>8</sub> ]; S = ½ (ruffled)     | 114 |
| 53. | Ni[A <sub>4</sub> Br <sub>8</sub> ]; S = 0 (saddled)     | 116 |
| 54. | Ni[A <sub>4</sub> Br <sub>8</sub> ]; S = 0 (ruffled)     | 118 |
| 55. | Pd[A <sub>4</sub> Br <sub>8</sub> ]; S = 0 (saddled)     | 120 |
| 56. | Pd[A <sub>4</sub> Br <sub>8</sub> ]; S = 0 (ruffled)     | 122 |
| 57. | Pt[A <sub>4</sub> Br <sub>8</sub> ]; S = 0 (saddled)     | 124 |
| 58. | Pt[A <sub>4</sub> Br <sub>8</sub> ]; S = 0 (ruffled)     | 126 |
| 59. | Zn[A <sub>4</sub> Br <sub>8</sub> ]; S = 0 (saddled)     | 128 |
| 60. | Zn[A <sub>4</sub> Br <sub>8</sub> ]; S = 0 (ruffled)     | 130 |
| 61. | Cu[Ph <sub>4</sub> Bz <sub>8</sub> ]; S = ½ (saddled)    | 132 |
| 62. | Cu[Ph <sub>4</sub> Bz <sub>8</sub> ]; S = ½ (ruffled)    | 134 |

|      |                                                       |     |
|------|-------------------------------------------------------|-----|
| 63.  | Ni[Ph <sub>4</sub> Bz <sub>8</sub> ]; S = 0 (saddled) | 136 |
| 64.  | Ni[Ph <sub>4</sub> Bz <sub>8</sub> ]; S = 0 (ruffled) | 138 |
| 65.  | Pd[Ph <sub>4</sub> Bz <sub>8</sub> ]; S = 0 (saddled) | 140 |
| 66.  | Pd[Ph <sub>4</sub> Bz <sub>8</sub> ]; S = 0 (ruffled) | 142 |
| 67.  | Pt[Ph <sub>4</sub> Bz <sub>8</sub> ]; S = 0 (saddled) | 144 |
| 68.  | Pt[Ph <sub>4</sub> Bz <sub>8</sub> ]; S = 0 (ruffled) | 146 |
| 69.  | Zn[Ph <sub>4</sub> Bz <sub>8</sub> ]; S = 0 (saddled) | 148 |
| 70.  | Zn[Ph <sub>4</sub> Bz <sub>8</sub> ]; S = 0 (ruffled) | 150 |
| 71.  | Cu[A <sub>4</sub> Bz <sub>8</sub> ]; S = ½ (saddled)  | 152 |
| 72.  | Cu[A <sub>4</sub> Bz <sub>8</sub> ]; S = ½ (ruffled)  | 155 |
| 73.  | Ni[A <sub>4</sub> Bz <sub>8</sub> ]; S = 0 (saddled)  | 157 |
| 74.  | Ni[A <sub>4</sub> Bz <sub>8</sub> ]; S = 0 (ruffled)  | 159 |
| 75.  | Pd[A <sub>4</sub> Bz <sub>8</sub> ]; S = 0 (saddled)  | 162 |
| 76.  | Pd[A <sub>4</sub> Bz <sub>8</sub> ]; S = 0 (ruffled)  | 164 |
| 77.  | Pt[A <sub>4</sub> Bz <sub>8</sub> ]; S = 0 (saddled)  | 166 |
| 78.  | Pt[A <sub>4</sub> Bz <sub>8</sub> ]; S = 0 (ruffled)  | 169 |
| 79.  | Zn[A <sub>4</sub> Bz <sub>8</sub> ]; S = 0 (saddled)  | 171 |
| 80.  | Zn[A <sub>4</sub> Bz <sub>8</sub> ]; S = 0 (ruffled)  | 174 |
| 81.  | Cu(TPP); S = ½ (saddled)                              | 176 |
| 82.  | Cu(TPP); S = ½ (ruffled)                              | 178 |
| 83.  | Ni(TPP); S = 0 (saddled)                              | 179 |
| 84.  | Ni(TPP); S = 0 (ruffled)                              | 181 |
| 85.  | Pd(TPP); S = 0 (saddled)                              | 182 |
| 86.  | Pd(TPP); S = 0 (ruffled)                              | 184 |
| 87.  | Pt(TPP); S = 0 (saddled)                              | 186 |
| 88.  | Pt(TPP); S = 0 (ruffled)                              | 187 |
| 89.  | Zn(TPP); S = 0 (saddled)                              | 189 |
| 90.  | Zn(TPP); S = 0 (ruffled)                              | 190 |
| 91.  | Cu(I <sub>8</sub> TPP); S = ½ (saddled)               | 192 |
| 92.  | Cu(I <sub>8</sub> TPP); S = ½ (ruffled)               | 194 |
| 93.  | Ni(I <sub>8</sub> TPP); S = 0 (saddled)               | 195 |
| 94.  | Ni(I <sub>8</sub> TPP); S = 0 (ruffled)               | 197 |
| 95.  | Pd(I <sub>8</sub> TPP); S = 0 (saddled)               | 198 |
| 96.  | Pd(I <sub>8</sub> TPP); S = 0 (ruffled)               | 200 |
| 97.  | Pt(I <sub>8</sub> TPP); S = 0 (saddled)               | 202 |
| 98.  | Pt(I <sub>8</sub> TPP); S = 0 (ruffled)               | 203 |
| 99.  | Zn(I <sub>8</sub> TPP); S = 0 (saddled)               | 205 |
| 100. | Zn(I <sub>8</sub> TPP); S = 0 (ruffled)               | 206 |
| 101. | Cu[A <sub>4</sub> Me <sub>8</sub> ]; S = ½ (saddled)  | 208 |
| 102. | Cu[A <sub>4</sub> Me <sub>8</sub> ]; S = ½ (ruffled)  | 210 |
| 103. | Ni[A <sub>4</sub> Me <sub>8</sub> ]; S = 0 (saddled)  | 213 |
| 104. | Ni[A <sub>4</sub> Me <sub>8</sub> ]; S = 0 (ruffled)  | 215 |
| 105. | Pd[A <sub>4</sub> Me <sub>8</sub> ]; S = 0 (saddled)  | 217 |
| 106. | Pd[A <sub>4</sub> Me <sub>8</sub> ]; S = 0 (ruffled)  | 220 |
| 107. | Pt[A <sub>4</sub> Me <sub>8</sub> ]; S = 0 (saddled)  | 222 |
| 108. | Pt[A <sub>4</sub> Me <sub>8</sub> ]; S = 0 (ruffled)  | 225 |
| 109. | Zn[A <sub>4</sub> Me <sub>8</sub> ]; S = 0 (saddled)  | 227 |
| 110. | Zn[A <sub>4</sub> Me <sub>8</sub> ]; S = 0 (ruffled)  | 229 |

**Table S1.** Experimental structural data for selected saddled porphyrins: average M-N distances (Å), saddled angles ( $\chi$ , deg), and  $\alpha$  and  $\beta$  carbon displacement (Å) above the N<sub>4</sub> plane, along with respective CCSD codes.

| Ligand type                         | Complex                                   | [M-N] <sub>ave</sub> | $\chi$ <sub>ave</sub> | (z <sub><math>\alpha</math></sub> ) <sub>ave</sub> | (z <sub><math>\beta</math></sub> ) <sub>ave</sub> | CCSD code |
|-------------------------------------|-------------------------------------------|----------------------|-----------------------|----------------------------------------------------|---------------------------------------------------|-----------|
| TPP                                 | Ni[TPP]                                   | 1.958                | 5.7                   | 0.085                                              | 0.181                                             | TATLOR    |
| TPP                                 | Cu[TPP]                                   | 1.983                | 7.4                   | 0.201                                              | 0.426                                             | UBOJIE    |
| TPP                                 | Zn[TPP]                                   | 2.025                | 7.0                   | 0.242                                              | 0.530                                             | SEMPAB    |
| TPP                                 | Pt[TPP]                                   | 2.012                | 8.1                   | 0.095                                              | 0.227                                             | CEZKEX01  |
| Cl <sub>8</sub> TPP                 | Ni[Cl <sub>8</sub> TPP]                   | 1.905                | 24.5                  | 0.368                                              | 0.893                                             | MUJRIS    |
| Cl <sub>8</sub> TPP                 | Ni[Cl <sub>8</sub> TPP]                   | 1.907                | 25.5                  | 0.368                                              | 0.899                                             | MUJRIS02  |
| Cl <sub>8</sub> TPP                 | Cu[Cl <sub>8</sub> TPFPFPP]               | 2.007                | 18.8                  | 0.292                                              | 0.701                                             | LALROF    |
| Cl <sub>8</sub> TPP                 | Zn[Cl <sub>8</sub> TPFPFPP]               | 2.033                | 31.0                  | 0.283                                              | 0.735                                             | ZALJAX    |
| Br <sub>8</sub> TPP                 | Ni[Br <sub>8</sub> TPFPFPP]               | 1.903                | 32.0                  | 0.491                                              | 1.175                                             | PAHKOY01  |
| Br <sub>8</sub> TPP                 | Ni[Br <sub>8</sub> TPFPFPP]               | 1.900                | 32.0                  | 0.487                                              | 1.164                                             | PAHKOY    |
| Br <sub>8</sub> TPP                 | Ni[Br <sub>8</sub> TMP]                   | 1.916                | 14.3                  | 0.446                                              | 0.998                                             | PAHKIS    |
| Br <sub>8</sub> TPP                 | Cu[Br <sub>8</sub> TPFPFPP]               | 1.971                | 37.9                  | 0.456                                              | 1.120                                             | LATSEE    |
| Br <sub>8</sub> TPP                 | Zn[Br <sub>8</sub> TPFPFPP]               | 2.040                | 42.5                  | 0.324                                              | 0.888                                             | LALRIZ    |
| I <sub>8</sub> TPP                  | NiI <sub>8</sub> T[P-CF <sub>3</sub> -P]P | 1.914                | 34.4                  | 0.499                                              | 1.200                                             | JUZQEC    |
| I <sub>8</sub> TPP                  | Cu[I <sub>8</sub> TpCF <sub>3</sub> PP]   | 1.970                | 48.5                  | 0.466                                              | 1.184                                             | JUZQIG    |
| (CF <sub>3</sub> ) <sub>8</sub> TPP | Ni[(CF <sub>3</sub> ) <sub>8</sub> TPP]   | 1.885                | 59.4                  | 0.559                                              | 1.433                                             | TAWVOD    |
| DPP                                 | Ni[pFPF <sub>8</sub> TPFP]P               | 1.914                | 24.9                  | 0.429                                              | 1.104                                             | TEZXEB    |
| DPP                                 | Ni[DPP]                                   | 1.832                | 34.8                  | 0.398                                              | 1.020                                             | XAWROC    |
| DPP                                 | Zn[Ph <sub>8</sub> TpOHPP]                | 2.025                | 20.6                  | 0.243                                              | 0.610                                             | ODIPIC    |
| DPP                                 | Zn[DPP]                                   | 2.037                | 39.0                  | 0.367                                              | 0.953                                             | XAWRES    |
| DPP                                 | Zn[DPP]                                   | 2.018                | 44.9                  | 0.382                                              | 1.015                                             | XAWSAP    |
| Ph <sub>4</sub> TBP                 | Cu[Ph <sub>4</sub> TBP]                   | 1.982                | 30.0                  | 0.390                                              | 0.962                                             | SASVEP    |
| Ph <sub>4</sub> TBP                 | Ni[Ph <sub>4</sub> TBP] <sup>b</sup>      | 1.915                | 22.0                  | 0.375                                              | 0.895                                             | BAYWOO    |
| Ph <sub>4</sub> TBP                 | Ni[Ph <sub>4</sub> TBP]                   | 1.913                | 28.8                  | 0.449                                              | 1.078                                             | SULDEI    |
| Ph <sub>4</sub> TBP                 | Pt[Ph <sub>4</sub> TBP]                   | 2.011                | 29.0                  | 0.373                                              | 0.921                                             | SEWCUT    |

<sup>a</sup> Abbreviations:

<sup>b</sup> One benzo group has a NO<sub>2</sub> group on it.

**Table S2.** Total energies for the indicated dodecasubstituted metalloporphyrins.

| Complex                             | M  |         | Total bonding energy E (eV) | $E_{\text{sad}} - E_{\text{ruf}}$ |
|-------------------------------------|----|---------|-----------------------------|-----------------------------------|
| DPP                                 | Cu | saddled | -1072.63                    | 0.02                              |
|                                     |    | ruffled | -1072.65                    |                                   |
|                                     | Ni | saddled | -1075.39                    | 0.15                              |
|                                     |    | ruffled | -1075.54                    |                                   |
|                                     | Pd | saddled | -1073.38                    | 0.00                              |
|                                     |    | ruffled | -1073.38                    |                                   |
|                                     | Pt | saddled | -1076.18                    | 0.05                              |
|                                     |    | ruffled | -1076.23                    |                                   |
|                                     | Zn | saddled | -1070.88                    | 0.01                              |
|                                     |    | ruffled | -1070.89                    |                                   |
| Br <sub>8</sub> TPP                 | Cu | saddled | -510.70                     | -0.65                             |
|                                     |    | ruffled | -510.06                     |                                   |
|                                     | Ni | saddled | -513.39                     | -0.57                             |
|                                     |    | ruffled | -512.81                     |                                   |
|                                     | Pd | saddled | -511.38                     | -0.62                             |
|                                     |    | ruffled | -510.76                     |                                   |
|                                     | Pt | saddled | -514.13                     | -0.58                             |
|                                     |    | ruffled | -513.55                     |                                   |
|                                     | Zn | saddled | -509.00                     | -0.58                             |
|                                     |    | ruffled | -508.42                     |                                   |
| Cl <sub>8</sub> TPP                 | Cu | saddled | -515.22                     | -0.47                             |
|                                     |    | ruffled | -514.76                     |                                   |
|                                     | Ni | saddled | -517.89                     | -0.42                             |
|                                     |    | ruffled | -517.47                     |                                   |
|                                     | Pd | saddled | -515.92                     | -0.43                             |
|                                     |    | ruffled | -515.49                     |                                   |
|                                     | Pt | saddled | -518.68                     | -0.39                             |
|                                     |    | ruffled | -518.29                     |                                   |
|                                     | Zn | saddled | -513.55                     | -0.37                             |
|                                     |    | ruffled | -513.18                     |                                   |
| (CF <sub>3</sub> ) <sub>8</sub> TPP | Cu | saddled | -667.91                     | -0.88                             |
|                                     |    | ruffled | -667.02                     |                                   |
|                                     | Ni | saddled | -670.71                     | -0.56                             |
|                                     |    | ruffled | -670.15                     |                                   |
|                                     | Pd | saddled | -668.44                     | -0.91                             |
|                                     |    | ruffled | -667.53                     |                                   |
|                                     | Pt | saddled | -671.15                     | -0.85                             |
|                                     |    | ruffled | -670.30                     |                                   |
|                                     | Zn | saddled | -666.04                     | -1.00                             |
|                                     |    | ruffled | -665.04                     |                                   |
| Me <sub>8</sub> TPP                 | Cu | saddled | -660.09                     | -0.40                             |
|                                     |    | ruffled | -659.69                     |                                   |
|                                     | Ni | saddled | -662.83                     | -0.32                             |
|                                     |    | ruffled | -662.51                     |                                   |
|                                     | Pd | saddled | -660.84                     | -0.38                             |
|                                     |    | ruffled | -660.46                     |                                   |

|                                 |    |         |         |       |
|---------------------------------|----|---------|---------|-------|
|                                 | Pt | saddled | -663.65 | -0.36 |
|                                 |    | ruffled | -663.30 |       |
|                                 | Zn | saddled | -658.39 | -0.38 |
|                                 |    | ruffled | -658.01 |       |
| A <sub>4</sub> Br <sub>8</sub>  | Cu | saddled | -552.39 | 0.03  |
|                                 |    | ruffled | -552.42 |       |
|                                 | Ni | saddled | -555.01 | 0.25  |
|                                 |    | ruffled | -555.26 |       |
|                                 | Pd | saddled | -552.98 | 0.06  |
|                                 |    | ruffled | -553.04 |       |
|                                 | Pt | saddled | -555.70 | 0.10  |
|                                 |    | ruffled | -555.80 |       |
|                                 | Zn | saddled | -550.70 | -0.01 |
|                                 |    | ruffled | -550.70 |       |
| Ph <sub>4</sub> Bz <sub>4</sub> | Cu | saddled | -701.40 | -0.25 |
|                                 |    | ruffled | -701.16 |       |
|                                 | Ni | saddled | -704.11 | -0.15 |
|                                 |    | ruffled | -703.96 |       |
|                                 | Pd | saddled | -702.23 | -0.24 |
|                                 |    | ruffled | -701.99 |       |
|                                 | Pt | saddled | -705.06 | -0.24 |
|                                 |    | ruffled | -704.83 |       |
|                                 | Zn | saddled | -699.76 | -0.26 |
|                                 |    | ruffled | -699.50 |       |
| A <sub>4</sub> Bz <sub>4</sub>  | Cu | saddled | -743.30 | -0.03 |
|                                 |    | ruffled | -743.27 |       |
|                                 | Ni | saddled | -746.09 | 0.02  |
|                                 |    | ruffled | -746.10 |       |
|                                 | Pd | saddled | -744.05 | -0.02 |
|                                 |    | ruffled | -744.03 |       |
|                                 | Pt | saddled | -746.86 | -0.01 |
|                                 |    | ruffled | -746.84 |       |
|                                 | Zn | saddled | -741.65 | -0.10 |
|                                 |    | ruffled | -741.55 |       |
| TPP                             | Cu | saddled | -528.92 | -0.05 |
|                                 |    | ruffled | -528.87 |       |
|                                 | Ni | saddled | -531.53 | -0.03 |
|                                 |    | ruffled | -531.51 |       |
|                                 | Pd | saddled | -529.74 | -0.03 |
|                                 |    | ruffled | -529.71 |       |
|                                 | Pt | saddled | -532.61 | -0.03 |
|                                 |    | ruffled | -532.58 |       |
|                                 | Zn | saddled | -527.33 | -0.06 |
|                                 |    | ruffled | -527.27 |       |
| I <sub>8</sub> TPP              | Cu | saddled | -506.14 | -0.92 |
|                                 |    | ruffled | -505.22 |       |
|                                 | Ni | saddled | -508.85 | -0.81 |
|                                 |    | ruffled | -508.05 |       |
|                                 | Pd | saddled | -506.79 | -0.95 |
|                                 |    | ruffled | -505.84 |       |

|                                |    |         |         |       |
|--------------------------------|----|---------|---------|-------|
|                                | Pt | saddled | -509.52 | -0.90 |
|                                |    | ruffled | -508.62 |       |
|                                | Zn | saddled | -504.39 | -0.93 |
|                                |    | ruffled | -503.46 |       |
| A <sub>4</sub> Me <sub>8</sub> | Cu | saddled | -702.16 | 0.05  |
|                                |    | ruffled | -702.21 |       |
|                                | Ni | saddled | -704.86 | 0.18  |
|                                |    | ruffled | -705.04 |       |
|                                | Pd | saddled | -702.86 | 0.07  |
|                                |    | ruffled | -702.93 |       |
|                                | Pt | saddled | -705.65 | 0.08  |
|                                |    | ruffled | -705.74 |       |
|                                | Zn | saddled | -700.50 | 0.00  |
|                                |    | ruffled | -700.50 |       |

**Table S3.** Total energies and zero-point vibrational energies for MTPP.

| <b>M</b> |         | <b>Total bonding energy <math>E</math> (eV)</b> | <b><math>E_{\text{sadd}} - E_{\text{ruff}}</math> (eV)<sup>a</sup></b> | <b>Total free energy <math>G</math> (eV)</b> | <b><math>G_{\text{sadd}} - G_{\text{ruff}}</math> (eV)<sup>a</sup></b> | <b>Zero-point vibrational energy (eV)</b> |
|----------|---------|-------------------------------------------------|------------------------------------------------------------------------|----------------------------------------------|------------------------------------------------------------------------|-------------------------------------------|
| Cu       | saddled | -528.92                                         | -0.05                                                                  | -514.91                                      | 0.10                                                                   | 15.79                                     |
|          | ruffled | -528.87                                         |                                                                        | -515.01                                      |                                                                        | 15.77                                     |
| Ni       | saddled | -531.53                                         | -0.03                                                                  | -517.43                                      | -0.06                                                                  | 15.83                                     |
|          | ruffled | -531.51                                         |                                                                        | -517.36                                      |                                                                        | 15.80                                     |
| Pd       | saddled | -529.74                                         | -0.03                                                                  | -515.72                                      | -0.15                                                                  | 15.83                                     |
|          | ruffled | -529.71                                         |                                                                        | -515.56                                      |                                                                        | 15.81                                     |
| Pt       | saddled | -532.61                                         | -0.03                                                                  | -518.45                                      | 0.13                                                                   | 15.83                                     |
|          | ruffled | -532.58                                         |                                                                        | -518.58                                      |                                                                        | 15.82                                     |
| Zn       | saddled | -527.33                                         | -0.06                                                                  | -513.43                                      | 0.08                                                                   | 15.78                                     |
|          | ruffled | -527.27                                         |                                                                        | -513.51                                      |                                                                        | 15.74                                     |

a Note: The free energy differences between ruffling and saddling complexes,  $G_{\text{sadd}} - G_{\text{ruff}}$ , showed the same trend than  $E_{\text{sadd}} - E_{\text{ruff}}$ , namely near zero difference for TPP complexes. We conclude that the ZPE cancels out energy differences between ruff and sadd and therefore will not change the trends and relationships obtained in the ms.

## Optimized coordinates

### 1. Cu(DPP); S = ½ (saddled)

|    |             |              |              |
|----|-------------|--------------|--------------|
| Cu | 0.000000000 | 0.000000000  | -0.028556000 |
| C  | 0.000000000 | 0.000000000  | 3.374373000  |
| C  | 0.000000000 | 0.000000000  | 4.863203000  |
| C  | 0.000000000 | 0.000000000  | 7.668017000  |
| C  | 0.000000000 | 0.000000000  | -3.461024000 |
| C  | 0.000000000 | 0.000000000  | -4.946103000 |
| C  | 0.000000000 | 0.000000000  | -7.752763000 |
| C  | 0.630477000 | -1.030738000 | 6.967325000  |
| C  | 0.638510000 | -1.024024000 | 5.574024000  |
| C  | 1.030109000 | 0.631330000  | -7.051572000 |
| C  | 1.031535000 | 0.626187000  | -5.658710000 |
| C  | 1.098319000 | -0.557109000 | -2.783090000 |
| C  | 1.226196000 | -2.971680000 | -4.930438000 |
| C  | 1.226544000 | 0.159909000  | 2.708911000  |
| C  | 1.267667000 | -3.738852000 | -6.093479000 |
| C  | 2.209062000 | -1.287582000 | -3.378390000 |
| C  | 2.231174000 | -2.030137000 | -4.653401000 |
| C  | 2.235179000 | 2.447540000  | 4.814023000  |
| C  | 2.315813000 | -3.579635000 | -7.003866000 |
| C  | 2.498051000 | 0.467476000  | 3.346347000  |
| C  | 2.518147000 | 3.176279000  | 5.968566000  |
| C  | 2.660877000 | -0.711370000 | -1.226116000 |
| C  | 2.736883000 | 1.146468000  | 4.641214000  |
| C  | 2.798808000 | -0.109943000 | 1.163768000  |
| C  | 3.193608000 | -1.353462000 | -2.412004000 |
| C  | 3.274870000 | -1.877154000 | -5.577950000 |
| C  | 3.308342000 | 2.615888000  | 6.975294000  |
| C  | 3.318390000 | -2.643509000 | -6.741679000 |
| C  | 3.399898000 | -0.430555000 | -0.059911000 |
| C  | 3.477060000 | 0.241518000  | 2.402754000  |
| C  | 3.523892000 | 0.594405000  | 5.660607000  |
| C  | 3.806570000 | 1.321111000  | 6.817166000  |
| C  | 4.421745000 | -2.179165000 | -2.473313000 |
| C  | 4.437629000 | -3.414395000 | -1.805770000 |
| C  | 4.876533000 | -0.302370000 | -0.249842000 |
| C  | 4.925525000 | 0.341364000  | 2.697216000  |
| C  | 5.334947000 | 0.792451000  | -0.998719000 |
| C  | 5.555666000 | -0.702295000 | 3.391847000  |
| C  | 5.562982000 | -1.784688000 | -3.182363000 |
| C  | 5.568487000 | -4.230096000 | -1.842136000 |
| C  | 5.676191000 | 1.473365000  | 2.357757000  |
| C  | 5.808573000 | -1.216093000 | 0.253733000  |
| C  | 6.696655000 | -2.596270000 | -3.215905000 |
| C  | 6.698923000 | 0.980152000  | -1.224735000 |
| C  | 6.704077000 | -3.821845000 | -2.545928000 |
| C  | 6.907538000 | -0.628127000 | 3.724112000  |



|   |              |              |              |
|---|--------------|--------------|--------------|
| C | 7.029760000  | 1.549323000  | 2.687133000  |
| C | 7.170984000  | -1.036187000 | 0.020244000  |
| C | 7.620659000  | 0.063663000  | -0.715426000 |
| C | 7.650806000  | 0.499458000  | 3.368640000  |
| C | -0.630477000 | 1.030738000  | 6.967325000  |
| C | -0.638510000 | 1.024024000  | 5.574024000  |
| C | -1.030109000 | -0.631330000 | -7.051572000 |
| C | -1.031535000 | -0.626187000 | -5.658710000 |
| C | -1.098319000 | 0.557109000  | -2.783090000 |
| C | -1.226196000 | 2.971680000  | -4.930438000 |
| C | -1.226544000 | -0.159909000 | 2.708911000  |
| C | -1.267667000 | 3.738852000  | -6.093479000 |
| C | -2.209062000 | 1.287582000  | -3.378390000 |
| C | -2.231174000 | 2.030137000  | -4.653401000 |
| C | -2.235179000 | -2.447540000 | 4.814023000  |
| C | -2.315813000 | 3.579635000  | -7.003866000 |
| C | -2.498051000 | -0.467476000 | 3.346347000  |
| C | -2.518147000 | -3.176279000 | 5.968566000  |
| C | -2.660877000 | 0.711370000  | -1.226116000 |
| C | -2.736883000 | -1.146468000 | 4.641214000  |
| C | -2.798808000 | 0.109943000  | 1.163768000  |
| C | -3.193608000 | 1.353462000  | -2.412004000 |
| C | -3.274870000 | 1.877154000  | -5.577950000 |
| C | -3.308342000 | -2.615888000 | 6.975294000  |
| C | -3.318390000 | 2.643509000  | -6.741679000 |
| C | -3.399898000 | 0.430555000  | -0.059911000 |
| C | -3.477060000 | -0.241518000 | 2.402754000  |
| C | -3.523892000 | -0.594405000 | 5.660607000  |
| C | -3.806570000 | -1.321111000 | 6.817166000  |
| C | -4.421745000 | 2.179165000  | -2.473313000 |
| C | -4.437629000 | 3.414395000  | -1.805770000 |
| C | -4.876533000 | 0.302370000  | -0.249842000 |
| C | -4.925525000 | -0.341364000 | 2.697216000  |
| C | -5.334947000 | -0.792451000 | -0.998719000 |
| C | -5.555666000 | 0.702295000  | 3.391847000  |
| C | -5.562982000 | 1.784688000  | -3.182363000 |
| C | -5.568487000 | 4.230096000  | -1.842136000 |
| C | -5.676191000 | -1.473365000 | 2.357757000  |
| C | -5.808573000 | 1.216093000  | 0.253733000  |
| C | -6.696655000 | 2.596270000  | -3.215905000 |
| C | -6.698923000 | -0.980152000 | -1.224735000 |
| C | -6.704077000 | 3.821845000  | -2.545928000 |
| C | -6.907538000 | 0.628127000  | 3.724112000  |
| C | -7.029760000 | -1.549323000 | 2.687133000  |
| C | -7.170984000 | 1.036187000  | 0.020244000  |
| C | -7.620659000 | -0.063663000 | -0.715426000 |
| C | -7.650806000 | -0.499458000 | 3.368640000  |
| H | 0.000000000  | 0.000000000  | 8.757760000  |
| H | 0.000000000  | 0.000000000  | -8.842474000 |
| H | 0.409935000  | -3.097192000 | -4.218834000 |
| H | 0.478772000  | -4.464592000 | -6.288918000 |

|   |              |              |              |
|---|--------------|--------------|--------------|
| H | 1.120296000  | -1.839565000 | 7.508481000  |
| H | 1.134591000  | -1.821227000 | 5.019921000  |
| H | 1.621078000  | 2.884568000  | 4.025978000  |
| H | 1.833706000  | 1.114925000  | -5.105587000 |
| H | 1.835104000  | 1.127791000  | -7.592242000 |
| H | 2.121405000  | 4.185001000  | 6.080668000  |
| H | 2.348732000  | -4.179336000 | -7.913216000 |
| H | 3.532447000  | 3.183967000  | 7.877998000  |
| H | 3.551389000  | -3.726132000 | -1.252767000 |
| H | 3.906399000  | -0.417623000 | 5.549528000  |
| H | 4.045045000  | -1.133260000 | -5.389073000 |
| H | 4.136375000  | -2.505512000 | -7.448146000 |
| H | 4.418286000  | 0.871474000  | 7.598644000  |
| H | 4.607221000  | 1.499152000  | -1.398878000 |
| H | 4.973268000  | -1.585534000 | 3.653911000  |
| H | 5.193071000  | 2.290318000  | 1.823517000  |
| H | 5.456888000  | -2.077816000 | 0.817906000  |
| H | 5.561968000  | -5.186594000 | -1.320160000 |
| H | 5.571482000  | -0.814716000 | -3.676397000 |
| H | 7.039542000  | 1.840286000  | -1.800813000 |
| H | 7.380726000  | -1.451416000 | 4.258735000  |
| H | 7.580484000  | -2.265542000 | -3.760364000 |
| H | 7.590530000  | -4.455292000 | -2.572182000 |
| H | 7.601934000  | 2.433924000  | 2.410093000  |
| H | 7.883778000  | -1.759562000 | 0.413326000  |
| H | 8.687030000  | 0.202578000  | -0.892974000 |
| H | 8.708707000  | 0.561655000  | 3.622865000  |
| H | -0.409935000 | 3.097192000  | -4.218834000 |
| H | -0.478772000 | 4.464592000  | -6.288918000 |
| H | -1.120296000 | 1.839565000  | 7.508481000  |
| H | -1.134591000 | 1.821227000  | 5.019921000  |
| H | -1.621078000 | -2.884568000 | 4.025978000  |
| H | -1.833706000 | -1.114925000 | -5.105587000 |
| H | -1.835104000 | -1.127791000 | -7.592242000 |
| H | -2.121405000 | -4.185001000 | 6.080668000  |
| H | -2.348732000 | 4.179336000  | -7.913216000 |
| H | -3.532447000 | -3.183967000 | 7.877998000  |
| H | -3.551389000 | 3.726132000  | -1.252767000 |
| H | -3.906399000 | 0.417623000  | 5.549528000  |
| H | -4.045045000 | 1.133260000  | -5.389073000 |
| H | -4.136375000 | 2.505512000  | -7.448146000 |
| H | -4.418286000 | -0.871474000 | 7.598644000  |
| H | -4.607221000 | -1.499152000 | -1.398878000 |
| H | -4.973268000 | 1.585534000  | 3.653911000  |
| H | -5.193071000 | -2.290318000 | 1.823517000  |
| H | -5.456888000 | 2.077816000  | 0.817906000  |
| H | -5.561968000 | 5.186594000  | -1.320160000 |
| H | -5.571482000 | 0.814716000  | -3.676397000 |
| H | -7.039542000 | -1.840286000 | -1.800813000 |
| H | -7.380726000 | 1.451416000  | 4.258735000  |
| H | -7.580484000 | 2.265542000  | -3.760364000 |

|   |              |              |              |
|---|--------------|--------------|--------------|
| H | -7.590530000 | 4.455292000  | -2.572182000 |
| H | -7.601934000 | -2.433924000 | 2.410093000  |
| H | -7.883778000 | 1.759562000  | 0.413326000  |
| H | -8.687030000 | -0.202578000 | -0.892974000 |
| H | -8.708707000 | -0.561655000 | 3.622865000  |
| N | 1.363937000  | -0.317995000 | -1.448732000 |
| N | 1.430729000  | -0.119733000 | 1.375750000  |
| N | -1.363937000 | 0.317995000  | -1.448732000 |
| N | -1.430729000 | 0.119733000  | 1.375750000  |

## 2. Cu(DPP]; S = ½ (ruffled)

|    |             |              |              |
|----|-------------|--------------|--------------|
| Cu | 0.000000000 | 0.000000000  | 0.000000000  |
| C  | 0.135004000 | 2.534255000  | -7.373381000 |
| C  | 0.135004000 | -2.534255000 | 7.373381000  |
| C  | 0.136477000 | 7.373732000  | -2.533961000 |
| C  | 0.136477000 | -7.373732000 | 2.533961000  |
| C  | 0.221979000 | 6.189608000  | 1.889749000  |
| C  | 0.221979000 | -6.189608000 | -1.889749000 |
| C  | 0.222910000 | 1.890163000  | 6.189010000  |
| C  | 0.222910000 | -1.890163000 | -6.189010000 |
| C  | 0.352565000 | 0.594016000  | -4.135836000 |
| C  | 0.352565000 | -0.594016000 | 4.135836000  |
| C  | 0.352770000 | 4.135972000  | -0.593929000 |
| C  | 0.352770000 | -4.135972000 | 0.593929000  |
| C  | 0.501773000 | 0.997947000  | -2.744855000 |
| C  | 0.501773000 | -0.997947000 | 2.744855000  |
| C  | 0.502028000 | 2.744990000  | -0.997833000 |
| C  | 0.502028000 | -2.744990000 | 0.997833000  |
| C  | 0.753000000 | 1.298501000  | -5.373897000 |
| C  | 0.753000000 | -1.298501000 | 5.373897000  |
| C  | 0.753588000 | 5.373908000  | -1.298344000 |
| C  | 0.753588000 | -5.373908000 | 1.298344000  |
| C  | 0.886530000 | 2.269975000  | -2.269931000 |
| C  | 0.886530000 | -2.269975000 | 2.269931000  |
| C  | 1.210151000 | 4.058199000  | -4.058259000 |
| C  | 1.210151000 | -4.058199000 | 4.058259000  |
| C  | 1.474247000 | 2.583200000  | -7.766822000 |
| C  | 1.474247000 | -2.583200000 | 7.766822000  |
| C  | 1.475940000 | 7.766387000  | -2.583265000 |
| C  | 1.475940000 | -7.766387000 | 2.583265000  |
| C  | 1.733220000 | 3.140319000  | -3.140722000 |
| C  | 1.733220000 | -3.140319000 | 3.140722000  |
| C  | 2.061793000 | 4.838220000  | -4.838635000 |
| C  | 2.061793000 | -4.838220000 | 4.838635000  |
| C  | 2.091742000 | 1.335173000  | -5.787303000 |
| C  | 2.091742000 | -1.335173000 | 5.787303000  |
| C  | 2.092569000 | 5.786529000  | -1.335343000 |
| C  | 2.092569000 | -5.786529000 | 1.335343000  |
| C  | 2.450742000 | 1.975771000  | -6.972481000 |

|   |              |              |              |
|---|--------------|--------------|--------------|
| C | 2.450742000  | -1.975771000 | 6.972481000  |
| C | 2.452106000  | 6.971500000  | -1.976008000 |
| C | 2.452106000  | -6.971500000 | 1.976008000  |
| C | 3.123467000  | 3.016519000  | -3.017691000 |
| C | 3.123467000  | -3.016519000 | 3.017691000  |
| C | 3.447646000  | 4.709960000  | -4.711159000 |
| C | 3.447646000  | -4.709960000 | 4.711159000  |
| C | 3.978512000  | 3.797092000  | -3.798681000 |
| C | 3.978512000  | -3.797092000 | 3.798681000  |
| C | -0.135004000 | 2.534255000  | 7.373381000  |
| C | -0.135004000 | -2.534255000 | -7.373381000 |
| C | -0.136477000 | 7.373732000  | 2.533961000  |
| C | -0.136477000 | -7.373732000 | -2.533961000 |
| C | -0.221979000 | 6.189608000  | -1.889749000 |
| C | -0.221979000 | -6.189608000 | 1.889749000  |
| C | -0.222910000 | 1.890163000  | -6.189010000 |
| C | -0.222910000 | -1.890163000 | 6.189010000  |
| C | -0.352565000 | 0.594016000  | 4.135836000  |
| C | -0.352565000 | -0.594016000 | -4.135836000 |
| C | -0.352770000 | 4.135972000  | 0.593929000  |
| C | -0.352770000 | -4.135972000 | -0.593929000 |
| C | -0.501773000 | 0.997947000  | 2.744855000  |
| C | -0.501773000 | -0.997947000 | -2.744855000 |
| C | -0.502028000 | 2.744990000  | 0.997833000  |
| C | -0.502028000 | -2.744990000 | -0.997833000 |
| C | -0.753000000 | 1.298501000  | 5.373897000  |
| C | -0.753000000 | -1.298501000 | -5.373897000 |
| C | -0.753588000 | 5.373908000  | 1.298344000  |
| C | -0.753588000 | -5.373908000 | -1.298344000 |
| C | -0.886530000 | 2.269975000  | 2.269931000  |
| C | -0.886530000 | -2.269975000 | -2.269931000 |
| C | -1.210151000 | 4.058199000  | 4.058259000  |
| C | -1.210151000 | -4.058199000 | -4.058259000 |
| C | -1.474247000 | 2.583200000  | 7.766822000  |
| C | -1.474247000 | -2.583200000 | -7.766822000 |
| C | -1.475940000 | 7.766387000  | 2.583265000  |
| C | -1.475940000 | -7.766387000 | -2.583265000 |
| C | -1.733220000 | 3.140319000  | 3.140722000  |
| C | -1.733220000 | -3.140319000 | -3.140722000 |
| C | -2.061793000 | 4.838220000  | 4.838635000  |
| C | -2.061793000 | -4.838220000 | -4.838635000 |
| C | -2.091742000 | 1.335173000  | 5.787303000  |
| C | -2.091742000 | -1.335173000 | -5.787303000 |
| C | -2.092569000 | 5.786529000  | 1.335343000  |
| C | -2.092569000 | -5.786529000 | -1.335343000 |
| C | -2.450742000 | 1.975771000  | 6.972481000  |
| C | -2.450742000 | -1.975771000 | -6.972481000 |
| C | -2.452106000 | 6.971500000  | 1.976008000  |
| C | -2.452106000 | -6.971500000 | -1.976008000 |
| C | -3.123467000 | 3.016519000  | 3.017691000  |
| C | -3.123467000 | -3.016519000 | -3.017691000 |

|   |              |              |              |
|---|--------------|--------------|--------------|
| C | -3.447646000 | 4.709960000  | 4.711159000  |
| C | -3.447646000 | -4.709960000 | -4.711159000 |
| C | -3.978512000 | 3.797092000  | 3.798681000  |
| C | -3.978512000 | -3.797092000 | -3.798681000 |
| H | 0.130661000  | 4.156695000  | -4.156066000 |
| H | 0.130661000  | -4.156695000 | 4.156066000  |
| H | 0.632869000  | 7.992397000  | 2.995016000  |
| H | 0.632869000  | -7.992397000 | -2.995016000 |
| H | 0.634563000  | 2.995514000  | 7.991627000  |
| H | 0.634563000  | -2.995514000 | -7.991627000 |
| H | 1.265861000  | 5.880241000  | 1.845812000  |
| H | 1.265861000  | -5.880241000 | -1.845812000 |
| H | 1.266600000  | 1.846608000  | 5.878922000  |
| H | 1.266600000  | -1.846608000 | -5.878922000 |
| H | 1.640608000  | 5.548326000  | -5.548408000 |
| H | 1.640608000  | -5.548326000 | 5.548408000  |
| H | 1.756069000  | 3.088122000  | -8.690672000 |
| H | 1.756069000  | -3.088122000 | 8.690672000  |
| H | 1.758190000  | 8.690048000  | -3.088275000 |
| H | 1.758190000  | -8.690048000 | 3.088275000  |
| H | 2.853098000  | 0.871075000  | -5.161314000 |
| H | 2.853098000  | -0.871075000 | 5.161314000  |
| H | 2.853611000  | 5.160126000  | -0.871328000 |
| H | 2.853611000  | -5.160126000 | 0.871328000  |
| H | 3.497249000  | 2.005681000  | -7.273747000 |
| H | 3.497249000  | -2.005681000 | 7.273747000  |
| H | 3.498757000  | 7.272188000  | -2.006093000 |
| H | 3.498757000  | -7.272188000 | 2.006093000  |
| H | 3.530016000  | 2.300879000  | -2.302317000 |
| H | 3.530016000  | -2.300879000 | 2.302317000  |
| H | 4.111179000  | 5.321289000  | -5.322727000 |
| H | 4.111179000  | -5.321289000 | 5.322727000  |
| H | 5.057838000  | 3.690148000  | -3.692301000 |
| H | 5.057838000  | -3.690148000 | 3.692301000  |
| H | -0.130661000 | 4.156695000  | 4.156066000  |
| H | -0.130661000 | -4.156695000 | -4.156066000 |
| H | -0.632869000 | 7.992397000  | -2.995016000 |
| H | -0.632869000 | -7.992397000 | 2.995016000  |
| H | -0.634563000 | 2.995514000  | -7.991627000 |
| H | -0.634563000 | -2.995514000 | 7.991627000  |
| H | -1.265861000 | 5.880241000  | -1.845812000 |
| H | -1.265861000 | -5.880241000 | 1.845812000  |
| H | -1.266600000 | 1.846608000  | -5.878922000 |
| H | -1.266600000 | -1.846608000 | 5.878922000  |
| H | -1.640608000 | 5.548326000  | 5.548408000  |
| H | -1.640608000 | -5.548326000 | -5.548408000 |
| H | -1.756069000 | 3.088122000  | 8.690672000  |
| H | -1.756069000 | -3.088122000 | -8.690672000 |
| H | -1.758190000 | 8.690048000  | 3.088275000  |
| H | -1.758190000 | -8.690048000 | -3.088275000 |
| H | -2.853098000 | 0.871075000  | 5.161314000  |

|   |              |              |              |
|---|--------------|--------------|--------------|
| H | -2.853098000 | -0.871075000 | -5.161314000 |
| H | -2.853611000 | 5.160126000  | 0.871328000  |
| H | -2.853611000 | -5.160126000 | -0.871328000 |
| H | -3.497249000 | 2.005681000  | 7.273747000  |
| H | -3.497249000 | -2.005681000 | -7.273747000 |
| H | -3.498757000 | 7.272188000  | 2.006093000  |
| H | -3.498757000 | -7.272188000 | -2.006093000 |
| H | -3.530016000 | 2.300879000  | 2.302317000  |
| H | -3.530016000 | -2.300879000 | -2.302317000 |
| H | -4.111179000 | 5.321289000  | 5.322727000  |
| H | -4.111179000 | -5.321289000 | -5.322727000 |
| H | -5.057838000 | 3.690148000  | 3.692301000  |
| H | -5.057838000 | -3.690148000 | -3.692301000 |
| N | 0.000000000  | 0.000000000  | 1.946175000  |
| N | 0.000000000  | 0.000000000  | -1.946175000 |
| N | 0.000000000  | 1.946347000  | 0.000000000  |
| N | 0.000000000  | -1.946347000 | 0.000000000  |

### 3. Ni(DPP]; S = 0 (saddled)

|    |             |              |              |
|----|-------------|--------------|--------------|
| Ni | 0.000000000 | 0.000000000  | -0.028280000 |
| C  | 0.000000000 | 0.000000000  | 3.349456000  |
| C  | 0.000000000 | 0.000000000  | 4.837384000  |
| C  | 0.000000000 | 0.000000000  | 7.642445000  |
| C  | 0.000000000 | 0.000000000  | -3.419385000 |
| C  | 0.000000000 | 0.000000000  | -4.904378000 |
| C  | 0.000000000 | 0.000000000  | -7.711004000 |
| C  | 0.728538000 | -0.963939000 | 6.941612000  |
| C  | 0.735410000 | -0.956887000 | 5.548242000  |
| C  | 0.971946000 | -3.847597000 | -5.964831000 |
| C  | 0.996485000 | -3.057964000 | -4.816747000 |
| C  | 1.036364000 | -0.635360000 | -2.726024000 |
| C  | 1.077035000 | 0.547320000  | -7.009743000 |
| C  | 1.077856000 | 0.542592000  | -5.616679000 |
| C  | 1.192613000 | 0.252597000  | 2.665956000  |
| C  | 1.984250000 | 2.643426000  | 4.661582000  |
| C  | 2.027321000 | -3.791868000 | -6.879213000 |
| C  | 2.076534000 | -2.197093000 | -4.557850000 |
| C  | 2.111416000 | -1.426820000 | -3.301487000 |
| C  | 2.180471000 | 3.443301000  | 5.786166000  |
| C  | 2.447399000 | 0.643777000  | 3.279763000  |
| C  | 2.599448000 | -0.799260000 | -1.174399000 |
| C  | 2.623026000 | 1.396921000  | 4.541356000  |
| C  | 2.765559000 | -0.023224000 | 1.128514000  |
| C  | 3.018428000 | 3.010095000  | 6.816889000  |
| C  | 3.097026000 | -1.500930000 | -2.338187000 |
| C  | 3.103602000 | -2.935987000 | -6.636040000 |
| C  | 3.126167000 | -2.146602000 | -5.487164000 |
| C  | 3.367980000 | -0.443572000 | -0.057453000 |
| C  | 3.431814000 | 0.414407000  | 2.343153000  |

|   |              |              |              |
|---|--------------|--------------|--------------|
| C | 3.456064000  | 0.972050000  | 5.584927000  |
| C | 3.651843000  | 1.770193000  | 6.712086000  |
| C | 4.280664000  | -3.548486000 | -1.589561000 |
| C | 4.294747000  | -2.371187000 | -2.355277000 |
| C | 4.842948000  | -0.356072000 | -0.270101000 |
| C | 4.877841000  | 0.590137000  | 2.606700000  |
| C | 5.312968000  | 0.653961000  | -1.123688000 |
| C | 5.382813000  | -4.402897000 | -1.574527000 |
| C | 5.438981000  | -2.072924000 | -3.105305000 |
| C | 5.549874000  | -0.350520000 | 3.401767000  |
| C | 5.590911000  | 1.694964000  | 2.125111000  |
| C | 5.763390000  | -1.232810000 | 0.313445000  |
| C | 6.520631000  | -4.091513000 | -2.323050000 |
| C | 6.544466000  | -2.923133000 | -3.087820000 |
| C | 6.677379000  | 0.794661000  | -1.377006000 |
| C | 6.903409000  | -0.201135000 | 3.700114000  |
| C | 6.946064000  | 1.846119000  | 2.420130000  |
| C | 7.126655000  | -1.100079000 | 0.053597000  |
| C | 7.588149000  | -0.084898000 | -0.788565000 |
| C | 7.607303000  | 0.899339000  | 3.206815000  |
| C | -0.728538000 | 0.963939000  | 6.941612000  |
| C | -0.735410000 | 0.956887000  | 5.548242000  |
| C | -0.971946000 | 3.847597000  | -5.964831000 |
| C | -0.996485000 | 3.057964000  | -4.816747000 |
| C | -1.036364000 | 0.635360000  | -2.726024000 |
| C | -1.077035000 | -0.547320000 | -7.009743000 |
| C | -1.077856000 | -0.542592000 | -5.616679000 |
| C | -1.192613000 | -0.252597000 | 2.665956000  |
| C | -1.984250000 | -2.643426000 | 4.661582000  |
| C | -2.027321000 | 3.791868000  | -6.879213000 |
| C | -2.076534000 | 2.197093000  | -4.557850000 |
| C | -2.111416000 | 1.426820000  | -3.301487000 |
| C | -2.180471000 | -3.443301000 | 5.786166000  |
| C | -2.447399000 | -0.643777000 | 3.279763000  |
| C | -2.599448000 | 0.799260000  | -1.174399000 |
| C | -2.623026000 | -1.396921000 | 4.541356000  |
| C | -2.765559000 | 0.023224000  | 1.128514000  |
| C | -3.018428000 | -3.010095000 | 6.816889000  |
| C | -3.097026000 | 1.500930000  | -2.338187000 |
| C | -3.103602000 | 2.935987000  | -6.636040000 |
| C | -3.126167000 | 2.146602000  | -5.487164000 |
| C | -3.367980000 | 0.443572000  | -0.057453000 |
| C | -3.431814000 | -0.414407000 | 2.343153000  |
| C | -3.456064000 | -0.972050000 | 5.584927000  |
| C | -3.651843000 | -1.770193000 | 6.712086000  |
| C | -4.280664000 | 3.548486000  | -1.589561000 |
| C | -4.294747000 | 2.371187000  | -2.355277000 |
| C | -4.842948000 | 0.356072000  | -0.270101000 |
| C | -4.877841000 | -0.590137000 | 2.606700000  |
| C | -5.312968000 | -0.653961000 | -1.123688000 |
| C | -5.382813000 | 4.402897000  | -1.574527000 |

|   |              |              |              |
|---|--------------|--------------|--------------|
| C | -5.438981000 | 2.072924000  | -3.105305000 |
| C | -5.549874000 | 0.350520000  | 3.401767000  |
| C | -5.590911000 | -1.694964000 | 2.125111000  |
| C | -5.763390000 | 1.232810000  | 0.313445000  |
| C | -6.520631000 | 4.091513000  | -2.323050000 |
| C | -6.544466000 | 2.923133000  | -3.087820000 |
| C | -6.677379000 | -0.794661000 | -1.377006000 |
| C | -6.903409000 | 0.201135000  | 3.700114000  |
| C | -6.946064000 | -1.846119000 | 2.420130000  |
| C | -7.126655000 | 1.100079000  | 0.053597000  |
| C | -7.588149000 | 0.084898000  | -0.788565000 |
| C | -7.607303000 | -0.899339000 | 3.206815000  |
| H | 0.000000000  | 0.000000000  | 8.732191000  |
| H | 0.000000000  | 0.000000000  | -8.800746000 |
| H | 0.125837000  | -4.509822000 | -6.145773000 |
| H | 0.174763000  | -3.102715000 | -4.101843000 |
| H | 1.294951000  | -1.721158000 | 7.482721000  |
| H | 1.306525000  | -1.702011000 | 4.994064000  |
| H | 1.331852000  | 2.980369000  | 3.855440000  |
| H | 1.678137000  | 4.407739000  | 5.856601000  |
| H | 1.916407000  | 0.965904000  | -5.063549000 |
| H | 1.919047000  | 0.978002000  | -7.550407000 |
| H | 2.008479000  | -4.408816000 | -7.777356000 |
| H | 3.174072000  | 3.633467000  | 7.697212000  |
| H | 3.393326000  | -3.783821000 | -1.001677000 |
| H | 3.927488000  | -2.877670000 | -7.346674000 |
| H | 3.940734000  | 0.001194000  | 5.519685000  |
| H | 3.953418000  | -1.462592000 | -5.316019000 |
| H | 4.300538000  | 1.418348000  | 7.513640000  |
| H | 4.593324000  | 1.331239000  | -1.584551000 |
| H | 4.999827000  | -1.217590000 | 3.766859000  |
| H | 5.076419000  | 2.430887000  | 1.508612000  |
| H | 5.352342000  | -5.313800000 | -0.977292000 |
| H | 5.401980000  | -2.028909000 | 0.962014000  |
| H | 5.474905000  | -1.144063000 | -3.671470000 |
| H | 7.027472000  | 1.589093000  | -2.035782000 |
| H | 7.384965000  | -4.755170000 | -2.309382000 |
| H | 7.408935000  | -0.945640000 | 4.314582000  |
| H | 7.431111000  | -2.666397000 | -3.666499000 |
| H | 7.488054000  | 2.708329000  | 2.033470000  |
| H | 7.831072000  | -1.794141000 | 0.509752000  |
| H | 8.655058000  | 0.017158000  | -0.986575000 |
| H | 8.666307000  | 1.019780000  | 3.433941000  |
| H | -0.125837000 | 4.509822000  | -6.145773000 |
| H | -0.174763000 | 3.102715000  | -4.101843000 |
| H | -1.294951000 | 1.721158000  | 7.482721000  |
| H | -1.306525000 | 1.702011000  | 4.994064000  |
| H | -1.331852000 | -2.980369000 | 3.855440000  |
| H | -1.678137000 | -4.407739000 | 5.856601000  |
| H | -1.916407000 | -0.965904000 | -5.063549000 |
| H | -1.919047000 | -0.978002000 | -7.550407000 |



|   |              |              |              |
|---|--------------|--------------|--------------|
| H | -2.008479000 | 4.408816000  | -7.777356000 |
| H | -3.174072000 | -3.633467000 | 7.697212000  |
| H | -3.393326000 | 3.783821000  | -1.001677000 |
| H | -3.927488000 | 2.877670000  | -7.346674000 |
| H | -3.940734000 | -0.001194000 | 5.519685000  |
| H | -3.953418000 | 1.462592000  | -5.316019000 |
| H | -4.300538000 | -1.418348000 | 7.513640000  |
| H | -4.593324000 | -1.331239000 | -1.584551000 |
| H | -4.999827000 | 1.217590000  | 3.766859000  |
| H | -5.076419000 | -2.430887000 | 1.508612000  |
| H | -5.352342000 | 5.313800000  | -0.977292000 |
| H | -5.401980000 | 2.028909000  | 0.962014000  |
| H | -5.474905000 | 1.144063000  | -3.671470000 |
| H | -7.027472000 | -1.589093000 | -2.035782000 |
| H | -7.384965000 | 4.755170000  | -2.309382000 |
| H | -7.408935000 | 0.945640000  | 4.314582000  |
| H | -7.431111000 | 2.666397000  | -3.666499000 |
| H | -7.488054000 | -2.708329000 | 2.033470000  |
| H | -7.831072000 | 1.794141000  | 0.509752000  |
| H | -8.655058000 | -0.017158000 | -0.986575000 |
| H | -8.666307000 | -1.019780000 | 3.433941000  |
| N | 1.299597000  | -0.387443000 | -1.386460000 |
| N | 1.391040000  | -0.053869000 | 1.332568000  |
| N | -1.299597000 | 0.387443000  | -1.386460000 |
| N | -1.391040000 | 0.053869000  | 1.332568000  |

#### 4. Ni(DPP]; S = 0 (ruffled)

|    |             |              |              |
|----|-------------|--------------|--------------|
| Ni | 0.000000000 | 0.000000000  | 0.000000000  |
| C  | 0.017322000 | 1.837068000  | -6.153098000 |
| C  | 0.017322000 | -1.837068000 | 6.153098000  |
| C  | 0.020054000 | 6.153926000  | -1.836966000 |
| C  | 0.020054000 | -6.153926000 | 1.836966000  |
| C  | 0.417461000 | 0.550813000  | -4.050930000 |
| C  | 0.417461000 | -0.550813000 | 4.050930000  |
| C  | 0.417789000 | 4.051140000  | -0.550628000 |
| C  | 0.417789000 | -4.051140000 | 0.550628000  |
| C  | 0.473178000 | 2.442304000  | -7.324192000 |
| C  | 0.473178000 | -2.442304000 | 7.324192000  |
| C  | 0.477381000 | 7.324405000  | -2.442316000 |
| C  | 0.477381000 | -7.324405000 | 2.442316000  |
| C  | 0.599662000 | 0.942686000  | -2.663669000 |
| C  | 0.599662000 | -0.942686000 | 2.663669000  |
| C  | 0.599999000 | 2.663815000  | -0.942442000 |
| C  | 0.599999000 | -2.663815000 | 0.942442000  |
| C  | 0.914667000 | 1.208141000  | -5.277816000 |
| C  | 0.914667000 | -1.208141000 | 5.277816000  |
| C  | 0.916225000 | 5.277809000  | -1.207520000 |
| C  | 0.916225000 | -5.277809000 | 1.207520000  |
| C  | 1.047848000 | 2.188826000  | -2.188691000 |

|   |              |              |              |
|---|--------------|--------------|--------------|
| C | 1.047848000  | -2.188826000 | 2.188691000  |
| C | 1.515251000  | 3.958347000  | -3.957899000 |
| C | 1.515251000  | -3.958347000 | 3.957899000  |
| C | 1.832649000  | 2.415125000  | -7.643699000 |
| C | 1.832649000  | -2.415125000 | 7.643699000  |
| C | 1.837153000  | 7.642534000  | -2.414699000 |
| C | 1.837153000  | -7.642534000 | 2.414699000  |
| C | 1.964826000  | 3.021015000  | -3.021013000 |
| C | 1.964826000  | -3.021015000 | 3.021013000  |
| C | 2.274694000  | 1.169571000  | -5.616633000 |
| C | 2.274694000  | -1.169571000 | 5.616633000  |
| C | 2.276579000  | 5.615376000  | -1.168371000 |
| C | 2.276579000  | -5.615376000 | 1.168371000  |
| C | 2.427726000  | 4.703224000  | -4.702861000 |
| C | 2.427726000  | -4.703224000 | 4.702861000  |
| C | 2.731307000  | 1.770997000  | -6.788521000 |
| C | 2.731307000  | -1.770997000 | 6.788521000  |
| C | 2.734654000  | 6.786642000  | -1.769912000 |
| C | 2.734654000  | -6.786642000 | 1.769912000  |
| C | 3.342771000  | 2.841605000  | -2.842487000 |
| C | 3.342771000  | -2.841605000 | 2.842487000  |
| C | 3.801234000  | 4.519849000  | -4.520306000 |
| C | 3.801234000  | -4.519849000 | 4.520306000  |
| C | 4.258543000  | 3.587032000  | -3.588165000 |
| C | 4.258543000  | -3.587032000 | 3.588165000  |
| C | -0.017322000 | 1.837068000  | 6.153098000  |
| C | -0.017322000 | -1.837068000 | -6.153098000 |
| C | -0.020054000 | 6.153926000  | 1.836966000  |
| C | -0.020054000 | -6.153926000 | -1.836966000 |
| C | -0.417461000 | 0.550813000  | 4.050930000  |
| C | -0.417461000 | -0.550813000 | -4.050930000 |
| C | -0.417789000 | 4.051140000  | 0.550628000  |
| C | -0.417789000 | -4.051140000 | -0.550628000 |
| C | -0.473178000 | 2.442304000  | 7.324192000  |
| C | -0.473178000 | -2.442304000 | -7.324192000 |
| C | -0.477381000 | 7.324405000  | 2.442316000  |
| C | -0.477381000 | -7.324405000 | -2.442316000 |
| C | -0.599662000 | 0.942686000  | 2.663669000  |
| C | -0.599662000 | -0.942686000 | -2.663669000 |
| C | -0.599999000 | 2.663815000  | 0.942442000  |
| C | -0.599999000 | -2.663815000 | -0.942442000 |
| C | -0.914667000 | 1.208141000  | 5.277816000  |
| C | -0.914667000 | -1.208141000 | -5.277816000 |
| C | -0.916225000 | 5.277809000  | 1.207520000  |
| C | -0.916225000 | -5.277809000 | -1.207520000 |
| C | -1.047848000 | 2.188826000  | 2.188691000  |
| C | -1.047848000 | -2.188826000 | -2.188691000 |
| C | -1.515251000 | 3.958347000  | 3.957899000  |
| C | -1.515251000 | -3.958347000 | -3.957899000 |
| C | -1.832649000 | 2.415125000  | 7.643699000  |
| C | -1.832649000 | -2.415125000 | -7.643699000 |

|   |              |              |              |
|---|--------------|--------------|--------------|
| C | -1.837153000 | 7.642534000  | 2.414699000  |
| C | -1.837153000 | -7.642534000 | -2.414699000 |
| C | -1.964826000 | 3.021015000  | 3.021013000  |
| C | -1.964826000 | -3.021015000 | -3.021013000 |
| C | -2.274694000 | 1.169571000  | 5.616633000  |
| C | -2.274694000 | -1.169571000 | -5.616633000 |
| C | -2.276579000 | 5.615376000  | 1.168371000  |
| C | -2.276579000 | -5.615376000 | -1.168371000 |
| C | -2.427726000 | 4.703224000  | 4.702861000  |
| C | -2.427726000 | -4.703224000 | -4.702861000 |
| C | -2.731307000 | 1.770997000  | 6.788521000  |
| C | -2.731307000 | -1.770997000 | -6.788521000 |
| C | -2.734654000 | 6.786642000  | 1.769912000  |
| C | -2.734654000 | -6.786642000 | -1.769912000 |
| C | -3.342771000 | 2.841605000  | 2.842487000  |
| C | -3.342771000 | -2.841605000 | -2.842487000 |
| C | -3.801234000 | 4.519849000  | 4.520306000  |
| C | -3.801234000 | -4.519849000 | -4.520306000 |
| C | -4.258543000 | 3.587032000  | 3.588165000  |
| C | -4.258543000 | -3.587032000 | -3.588165000 |
| H | 0.230822000  | 7.990402000  | 2.934258000  |
| H | 0.230822000  | -7.990402000 | -2.934258000 |
| H | 0.236012000  | 2.933668000  | 7.989604000  |
| H | 0.236012000  | -2.933668000 | -7.989604000 |
| H | 0.445196000  | 4.099364000  | -4.098353000 |
| H | 0.445196000  | -4.099364000 | 4.098353000  |
| H | 1.039937000  | 5.902556000  | 1.853496000  |
| H | 1.039937000  | -5.902556000 | -1.853496000 |
| H | 1.042454000  | 1.853063000  | 5.900731000  |
| H | 1.042454000  | -1.853063000 | -5.900731000 |
| H | 2.063895000  | 5.429093000  | -5.428237000 |
| H | 2.063895000  | -5.429093000 | 5.428237000  |
| H | 2.190638000  | 2.890197000  | -8.556936000 |
| H | 2.190638000  | -2.890197000 | 8.556936000  |
| H | 2.196241000  | 8.555258000  | -2.889969000 |
| H | 2.196241000  | -8.555258000 | 2.889969000  |
| H | 2.975109000  | 0.677119000  | -4.942910000 |
| H | 2.975109000  | -0.677119000 | 4.942910000  |
| H | 2.976128000  | 4.941056000  | -0.675510000 |
| H | 2.976128000  | -4.941056000 | 0.675510000  |
| H | 3.691141000  | 2.110732000  | -2.112089000 |
| H | 3.691141000  | -2.110732000 | 2.112089000  |
| H | 3.792878000  | 1.742103000  | -7.031373000 |
| H | 3.792878000  | -1.742103000 | 7.031373000  |
| H | 3.796478000  | 7.028421000  | -1.740703000 |
| H | 3.796478000  | -7.028421000 | 1.740703000  |
| H | 4.512625000  | 5.103720000  | -5.104277000 |
| H | 4.512625000  | -5.103720000 | 5.104277000  |
| H | 5.327704000  | 3.437368000  | -3.439063000 |
| H | 5.327704000  | -3.437368000 | 3.439063000  |
| H | -0.230822000 | 7.990402000  | -2.934258000 |

|   |              |              |              |
|---|--------------|--------------|--------------|
| H | -0.230822000 | -7.990402000 | 2.934258000  |
| H | -0.236012000 | 2.933668000  | -7.989604000 |
| H | -0.236012000 | -2.933668000 | 7.989604000  |
| H | -0.445196000 | 4.099364000  | 4.098353000  |
| H | -0.445196000 | -4.099364000 | -4.098353000 |
| H | -1.039937000 | 5.902556000  | -1.853496000 |
| H | -1.039937000 | -5.902556000 | 1.853496000  |
| H | -1.042454000 | 1.853063000  | -5.900731000 |
| H | -1.042454000 | -1.853063000 | 5.900731000  |
| H | -2.063895000 | 5.429093000  | 5.428237000  |
| H | -2.063895000 | -5.429093000 | -5.428237000 |
| H | -2.190638000 | 2.890197000  | 8.556936000  |
| H | -2.190638000 | -2.890197000 | -8.556936000 |
| H | -2.196241000 | 8.555258000  | 2.889969000  |
| H | -2.196241000 | -8.555258000 | -2.889969000 |
| H | -2.975109000 | 0.677119000  | 4.942910000  |
| H | -2.975109000 | -0.677119000 | -4.942910000 |
| H | -2.976128000 | 4.941056000  | 0.675510000  |
| H | -2.976128000 | -4.941056000 | -0.675510000 |
| H | -3.691141000 | 2.110732000  | 2.112089000  |
| H | -3.691141000 | -2.110732000 | -2.112089000 |
| H | -3.792878000 | 1.742103000  | 7.031373000  |
| H | -3.792878000 | -1.742103000 | -7.031373000 |
| H | -3.796478000 | 7.028421000  | 1.740703000  |
| H | -3.796478000 | -7.028421000 | -1.740703000 |
| H | -4.512625000 | 5.103720000  | 5.104277000  |
| H | -4.512625000 | -5.103720000 | -5.104277000 |
| H | -5.327704000 | 3.437368000  | 3.439063000  |
| H | -5.327704000 | -3.437368000 | -3.439063000 |
| N | 0.000000000  | 0.000000000  | 1.859497000  |
| N | 0.000000000  | 0.000000000  | -1.859497000 |
| N | 0.000000000  | 1.859623000  | 0.000000000  |
| N | 0.000000000  | -1.859623000 | 0.000000000  |

### 5. Pd(DPP]; S = 0 (saddled)

|    |             |              |              |
|----|-------------|--------------|--------------|
| Pd | 0.000000000 | 0.000000000  | -0.029914000 |
| C  | 0.000000000 | 0.000000000  | 3.390036000  |
| C  | 0.000000000 | 0.000000000  | 4.879458000  |
| C  | 0.000000000 | 0.000000000  | 7.682987000  |
| C  | 0.000000000 | 0.000000000  | -3.470765000 |
| C  | 0.000000000 | 0.000000000  | -4.957715000 |
| C  | 0.000000000 | 0.000000000  | -7.762842000 |
| C  | 0.597460000 | -1.050258000 | 6.982423000  |
| C  | 0.605186000 | -1.044023000 | 5.589209000  |
| C  | 0.989248000 | 0.693600000  | -7.061872000 |
| C  | 0.990955000 | 0.688518000  | -5.668890000 |
| C  | 1.117388000 | -0.529995000 | -2.804953000 |
| C  | 1.232950000 | 0.128673000  | 2.733064000  |
| C  | 1.375044000 | -2.911480000 | -5.007680000 |
| C  | 1.469147000 | -3.651671000 | -6.185291000 |

|   |              |              |              |
|---|--------------|--------------|--------------|
| C | 2.256631000  | -1.208644000 | -3.411951000 |
| C | 2.319455000  | -1.916760000 | -4.706569000 |
| C | 2.324768000  | 2.349806000  | 4.883172000  |
| C | 2.510296000  | -3.411370000 | -7.085797000 |
| C | 2.514222000  | 0.391287000  | 3.372543000  |
| C | 2.645205000  | 3.045833000  | 6.048172000  |
| C | 2.688631000  | -0.689143000 | -1.236740000 |
| C | 2.780482000  | 1.036640000  | 4.679835000  |
| C | 2.809664000  | -0.156348000 | 1.177748000  |
| C | 3.238617000  | -1.275047000 | -2.444822000 |
| C | 3.356649000  | -1.682408000 | -5.621240000 |
| C | 3.409360000  | -0.440929000 | -0.054469000 |
| C | 3.428048000  | 2.440047000  | 7.034150000  |
| C | 3.452749000  | -2.421460000 | -6.799435000 |
| C | 3.488287000  | 0.152760000  | 2.428261000  |
| C | 3.560872000  | 0.438812000  | 5.678370000  |
| C | 3.881308000  | 1.132901000  | 6.845008000  |
| C | 4.487523000  | -2.067898000 | -2.536606000 |
| C | 4.525495000  | -3.338020000 | -1.939702000 |
| C | 4.888198000  | -0.292089000 | -0.225659000 |
| C | 4.937372000  | 0.188948000  | 2.739674000  |
| C | 5.342217000  | 0.855262000  | -0.893128000 |
| C | 5.526111000  | -0.919213000 | 3.367702000  |
| C | 5.623340000  | -1.610141000 | -3.215328000 |
| C | 5.674260000  | -4.125788000 | -2.012603000 |
| C | 5.723233000  | 1.321095000  | 2.495517000  |
| C | 5.823036000  | -1.231395000 | 0.221051000  |
| C | 6.706397000  | 1.067616000  | -1.096206000 |
| C | 6.774632000  | -2.394206000 | -3.285642000 |
| C | 6.804987000  | -3.654445000 | -2.684031000 |
| C | 6.873462000  | -0.907385000 | 3.725251000  |
| C | 7.072569000  | 1.334759000  | 2.850567000  |
| C | 7.185693000  | -1.025859000 | 0.011062000  |
| C | 7.631655000  | 0.125091000  | -0.644117000 |
| C | 7.653026000  | 0.221473000  | 3.463462000  |
| C | -0.597460000 | 1.050258000  | 6.982423000  |
| C | -0.605186000 | 1.044023000  | 5.589209000  |
| C | -0.989248000 | -0.693600000 | -7.061872000 |
| C | -0.990955000 | -0.688518000 | -5.668890000 |
| C | -1.117388000 | 0.529995000  | -2.804953000 |
| C | -1.232950000 | -0.128673000 | 2.733064000  |
| C | -1.375044000 | 2.911480000  | -5.007680000 |
| C | -1.469147000 | 3.651671000  | -6.185291000 |
| C | -2.256631000 | 1.208644000  | -3.411951000 |
| C | -2.319455000 | 1.916760000  | -4.706569000 |
| C | -2.324768000 | -2.349806000 | 4.883172000  |
| C | -2.510296000 | 3.411370000  | -7.085797000 |
| C | -2.514222000 | -0.391287000 | 3.372543000  |
| C | -2.645205000 | -3.045833000 | 6.048172000  |
| C | -2.688631000 | 0.689143000  | -1.236740000 |
| C | -2.780482000 | -1.036640000 | 4.679835000  |

|   |              |              |              |
|---|--------------|--------------|--------------|
| C | -2.809664000 | 0.156348000  | 1.177748000  |
| C | -3.238617000 | 1.275047000  | -2.444822000 |
| C | -3.356649000 | 1.682408000  | -5.621240000 |
| C | -3.409360000 | 0.440929000  | -0.054469000 |
| C | -3.428048000 | -2.440047000 | 7.034150000  |
| C | -3.452749000 | 2.421460000  | -6.799435000 |
| C | -3.488287000 | -0.152760000 | 2.428261000  |
| C | -3.560872000 | -0.438812000 | 5.678370000  |
| C | -3.881308000 | -1.132901000 | 6.845008000  |
| C | -4.487523000 | 2.067898000  | -2.536606000 |
| C | -4.525495000 | 3.338020000  | -1.939702000 |
| C | -4.888198000 | 0.292089000  | -0.225659000 |
| C | -4.937372000 | -0.188948000 | 2.739674000  |
| C | -5.342217000 | -0.855262000 | -0.893128000 |
| C | -5.526111000 | 0.919213000  | 3.367702000  |
| C | -5.623340000 | 1.610141000  | -3.215328000 |
| C | -5.674260000 | 4.125788000  | -2.012603000 |
| C | -5.723233000 | -1.321095000 | 2.495517000  |
| C | -5.823036000 | 1.231395000  | 0.221051000  |
| C | -6.706397000 | -1.067616000 | -1.096206000 |
| C | -6.774632000 | 2.394206000  | -3.285642000 |
| C | -6.804987000 | 3.654445000  | -2.684031000 |
| C | -6.873462000 | 0.907385000  | 3.725251000  |
| C | -7.072569000 | -1.334759000 | 2.850567000  |
| C | -7.185693000 | 1.025859000  | 0.011062000  |
| C | -7.631655000 | -0.125091000 | -0.644117000 |
| C | -7.653026000 | -0.221473000 | 3.463462000  |
| H | 0.000000000  | 0.000000000  | 8.772686000  |
| H | 0.000000000  | 0.000000000  | -8.852545000 |
| H | 0.564875000  | -3.101319000 | -4.303323000 |
| H | 0.727145000  | -4.420296000 | -6.399514000 |
| H | 1.061808000  | -1.873984000 | 7.523481000  |
| H | 1.076096000  | -1.856094000 | 5.034879000  |
| H | 1.717567000  | 2.822861000  | 4.110739000  |
| H | 1.762277000  | 1.224257000  | -5.115417000 |
| H | 1.762405000  | 1.238271000  | -7.602580000 |
| H | 2.283762000  | 4.064802000  | 6.184436000  |
| H | 2.584419000  | -3.990477000 | -8.006013000 |
| H | 3.642350000  | -3.699698000 | -1.412767000 |
| H | 3.681762000  | 2.982882000  | 7.944524000  |
| H | 3.910702000  | -0.582021000 | 5.541183000  |
| H | 4.080277000  | -0.898146000 | -5.411339000 |
| H | 4.264918000  | -2.220589000 | -7.497487000 |
| H | 4.487712000  | 0.648274000  | 7.609553000  |
| H | 4.611719000  | 1.582430000  | -1.249118000 |
| H | 4.913817000  | -1.800178000 | 3.560733000  |
| H | 5.271160000  | 2.188197000  | 2.016099000  |
| H | 5.474257000  | -2.132148000 | 0.722296000  |
| H | 5.612183000  | -0.615319000 | -3.657331000 |
| H | 5.685207000  | -5.110135000 | -1.545334000 |
| H | 7.044170000  | 1.967689000  | -1.609456000 |

|   |              |              |              |
|---|--------------|--------------|--------------|
| H | 7.314598000  | -1.779445000 | 4.207303000  |
| H | 7.653934000  | -2.015353000 | -3.805552000 |
| H | 7.673089000  | 2.220753000  | 2.647962000  |
| H | 7.705187000  | -4.266338000 | -2.739009000 |
| H | 7.901138000  | -1.769171000 | 0.359451000  |
| H | 8.698112000  | 0.283788000  | -0.803777000 |
| H | 8.707520000  | 0.235555000  | 3.738308000  |
| H | -0.564875000 | 3.101319000  | -4.303323000 |
| H | -0.727145000 | 4.420296000  | -6.399514000 |
| H | -1.061808000 | 1.873984000  | 7.523481000  |
| H | -1.076096000 | 1.856094000  | 5.034879000  |
| H | -1.717567000 | -2.822861000 | 4.110739000  |
| H | -1.762277000 | -1.224257000 | -5.115417000 |
| H | -1.762405000 | -1.238271000 | -7.602580000 |
| H | -2.283762000 | -4.064802000 | 6.184436000  |
| H | -2.584419000 | 3.990477000  | -8.006013000 |
| H | -3.642350000 | 3.699698000  | -1.412767000 |
| H | -3.681762000 | -2.982882000 | 7.944524000  |
| H | -3.910702000 | 0.582021000  | 5.541183000  |
| H | -4.080277000 | 0.898146000  | -5.411339000 |
| H | -4.264918000 | 2.220589000  | -7.497487000 |
| H | -4.487712000 | -0.648274000 | 7.609553000  |
| H | -4.611719000 | -1.582430000 | -1.249118000 |
| H | -4.913817000 | 1.800178000  | 3.560733000  |
| H | -5.271160000 | -2.188197000 | 2.016099000  |
| H | -5.474257000 | 2.132148000  | 0.722296000  |
| H | -5.612183000 | 0.615319000  | -3.657331000 |
| H | -5.685207000 | 5.110135000  | -1.545334000 |
| H | -7.044170000 | -1.967689000 | -1.609456000 |
| H | -7.314598000 | 1.779445000  | 4.207303000  |
| H | -7.653934000 | 2.015353000  | -3.805552000 |
| H | -7.673089000 | -2.220753000 | 2.647962000  |
| H | -7.705187000 | 4.266338000  | -2.739009000 |
| H | -7.901138000 | 1.769171000  | 0.359451000  |
| H | -8.698112000 | -0.283788000 | -0.803777000 |
| H | -8.707520000 | -0.235555000 | 3.738308000  |
| N | 1.380853000  | -0.324821000 | -1.462109000 |
| N | 1.440849000  | -0.140624000 | 1.395415000  |
| N | -1.380853000 | 0.324821000  | -1.462109000 |
| N | -1.440849000 | 0.140624000  | 1.395415000  |

## 6. Pd(DPP]; S = 0 (ruffled)

|    |             |              |              |
|----|-------------|--------------|--------------|
| Pd | 0.000000000 | 0.000000000  | 0.000000000  |
| C  | 0.086085000 | 7.381684000  | 2.582926000  |
| C  | 0.086085000 | -7.381684000 | -2.582926000 |
| C  | 0.090871000 | 2.586024000  | 7.379151000  |
| C  | 0.090871000 | -2.586024000 | -7.379151000 |
| C  | 0.309355000 | 0.616746000  | -4.176534000 |
| C  | 0.309355000 | -0.616746000 | 4.176534000  |

|   |              |              |              |
|---|--------------|--------------|--------------|
| C | 0.309816000  | 4.176645000  | -0.616513000 |
| C | 0.309816000  | -4.176645000 | 0.616513000  |
| C | 0.378508000  | 6.190340000  | 1.918641000  |
| C | 0.378508000  | -6.190340000 | -1.918641000 |
| C | 0.381683000  | 1.919962000  | 6.188403000  |
| C | 0.381683000  | -1.919962000 | -6.188403000 |
| C | 0.442984000  | 1.031634000  | -2.786496000 |
| C | 0.442984000  | -1.031634000 | 2.786496000  |
| C | 0.443293000  | 2.786629000  | -1.031504000 |
| C | 0.443293000  | -2.786629000 | 1.031504000  |
| C | 0.643049000  | 1.350130000  | -5.419310000 |
| C | 0.643049000  | -1.350130000 | 5.419310000  |
| C | 0.644999000  | 5.419793000  | -1.348623000 |
| C | 0.644999000  | -5.419793000 | 1.348623000  |
| C | 0.786408000  | 2.314605000  | -2.314516000 |
| C | 0.786408000  | -2.314605000 | 2.314516000  |
| C | 1.022975000  | 4.112201000  | -4.110842000 |
| C | 1.022975000  | -4.112201000 | 4.110842000  |
| C | 1.229510000  | 2.678941000  | -7.824507000 |
| C | 1.229510000  | -2.678941000 | 7.824507000  |
| C | 1.234708000  | 7.826111000  | -2.673989000 |
| C | 1.234708000  | -7.826111000 | 2.673989000  |
| C | 1.589079000  | 3.207082000  | -3.206861000 |
| C | 1.589079000  | -3.207082000 | 3.206861000  |
| C | 1.837473000  | 4.912291000  | -4.910415000 |
| C | 1.837473000  | -4.912291000 | 4.910415000  |
| C | 1.962233000  | 1.430063000  | -5.885032000 |
| C | 1.962233000  | -1.430063000 | 5.885032000  |
| C | 1.964646000  | 5.884592000  | -1.426638000 |
| C | 1.964646000  | -5.884592000 | 1.426638000  |
| C | 2.254344000  | 2.093128000  | -7.076312000 |
| C | 2.254344000  | -2.093128000 | 7.076312000  |
| C | 2.258361000  | 7.076404000  | -2.088037000 |
| C | 2.258361000  | -7.076404000 | 2.088037000  |
| C | 2.984322000  | 3.115772000  | -3.116122000 |
| C | 2.984322000  | -3.115772000 | 3.116122000  |
| C | 3.228520000  | 4.816767000  | -4.815396000 |
| C | 3.228520000  | -4.816767000 | 4.815396000  |
| C | 3.802126000  | 3.916580000  | -3.916298000 |
| C | 3.802126000  | -3.916580000 | 3.916298000  |
| C | -0.086085000 | 7.381684000  | -2.582926000 |
| C | -0.086085000 | -7.381684000 | 2.582926000  |
| C | -0.090871000 | 2.586024000  | -7.379151000 |
| C | -0.090871000 | -2.586024000 | 7.379151000  |
| C | -0.309355000 | 0.616746000  | 4.176534000  |
| C | -0.309355000 | -0.616746000 | -4.176534000 |
| C | -0.309816000 | 4.176645000  | 0.616513000  |
| C | -0.309816000 | -4.176645000 | -0.616513000 |
| C | -0.378508000 | 6.190340000  | -1.918641000 |
| C | -0.378508000 | -6.190340000 | 1.918641000  |
| C | -0.381683000 | 1.919962000  | -6.188403000 |



|   |              |              |              |
|---|--------------|--------------|--------------|
| C | -0.381683000 | -1.919962000 | 6.188403000  |
| C | -0.442984000 | 1.031634000  | 2.786496000  |
| C | -0.442984000 | -1.031634000 | -2.786496000 |
| C | -0.443293000 | 2.786629000  | 1.031504000  |
| C | -0.443293000 | -2.786629000 | -1.031504000 |
| C | -0.643049000 | 1.350130000  | 5.419310000  |
| C | -0.643049000 | -1.350130000 | -5.419310000 |
| C | -0.644999000 | 5.419793000  | 1.348623000  |
| C | -0.644999000 | -5.419793000 | -1.348623000 |
| C | -0.786408000 | 2.314605000  | 2.314516000  |
| C | -0.786408000 | -2.314605000 | -2.314516000 |
| C | -1.022975000 | 4.112201000  | 4.110842000  |
| C | -1.022975000 | -4.112201000 | -4.110842000 |
| C | -1.229510000 | 2.678941000  | 7.824507000  |
| C | -1.229510000 | -2.678941000 | -7.824507000 |
| C | -1.234708000 | 7.826111000  | 2.673989000  |
| C | -1.234708000 | -7.826111000 | -2.673989000 |
| C | -1.589079000 | 3.207082000  | 3.206861000  |
| C | -1.589079000 | -3.207082000 | -3.206861000 |
| C | -1.837473000 | 4.912291000  | 4.910415000  |
| C | -1.837473000 | -4.912291000 | -4.910415000 |
| C | -1.962233000 | 1.430063000  | 5.885032000  |
| C | -1.962233000 | -1.430063000 | -5.885032000 |
| C | -1.964646000 | 5.884592000  | 1.426638000  |
| C | -1.964646000 | -5.884592000 | -1.426638000 |
| C | -2.254344000 | 2.093128000  | 7.076312000  |
| C | -2.254344000 | -2.093128000 | -7.076312000 |
| C | -2.258361000 | 7.076404000  | 2.088037000  |
| C | -2.258361000 | -7.076404000 | -2.088037000 |
| C | -2.984322000 | 3.115772000  | 3.116122000  |
| C | -2.984322000 | -3.115772000 | -3.116122000 |
| C | -3.228520000 | 4.816767000  | 4.815396000  |
| C | -3.228520000 | -4.816767000 | -4.815396000 |
| C | -3.802126000 | 3.916580000  | 3.916298000  |
| C | -3.802126000 | -3.916580000 | -3.916298000 |
| H | 0.060423000  | 4.185112000  | 4.183400000  |
| H | 0.060423000  | -4.185112000 | -4.183400000 |
| H | 0.892138000  | 7.965274000  | 3.026710000  |
| H | 0.892138000  | -7.965274000 | -3.026710000 |
| H | 0.897824000  | 3.029753000  | 7.961539000  |
| H | 0.897824000  | -3.029753000 | -7.961539000 |
| H | 1.383150000  | 5.612361000  | -5.609618000 |
| H | 1.383150000  | -5.612361000 | 5.609618000  |
| H | 1.407470000  | 5.839959000  | 1.842268000  |
| H | 1.407470000  | -5.839959000 | -1.842268000 |
| H | 1.410308000  | 1.842186000  | 5.837294000  |
| H | 1.410308000  | -1.842186000 | -5.837294000 |
| H | 1.459270000  | 3.200859000  | -8.753301000 |
| H | 1.459270000  | -3.200859000 | 8.753301000  |
| H | 1.465735000  | 8.755395000  | -3.194484000 |
| H | 1.465735000  | -8.755395000 | 3.194484000  |

|   |              |              |              |
|---|--------------|--------------|--------------|
| H | 2.761279000  | 0.982396000  | -5.295124000 |
| H | 2.761279000  | -0.982396000 | 5.295124000  |
| H | 2.762764000  | 5.293545000  | -0.978811000 |
| H | 2.762764000  | -5.293545000 | 0.978811000  |
| H | 3.286543000  | 2.156955000  | -7.418843000 |
| H | 3.286543000  | -2.156955000 | 7.418843000  |
| H | 3.290882000  | 7.418227000  | -2.150396000 |
| H | 3.290882000  | -7.418227000 | 2.150396000  |
| H | 3.424052000  | 2.409684000  | -2.410861000 |
| H | 3.424052000  | -2.409684000 | 2.410861000  |
| H | 3.862803000  | 5.443806000  | -5.441938000 |
| H | 3.862803000  | -5.443806000 | 5.441938000  |
| H | 4.885883000  | 3.835180000  | -3.835257000 |
| H | 4.885883000  | -3.835180000 | 3.835257000  |
| H | -0.060423000 | 4.185112000  | -4.183400000 |
| H | -0.060423000 | -4.185112000 | 4.183400000  |
| H | -0.892138000 | 7.965274000  | -3.026710000 |
| H | -0.892138000 | -7.965274000 | 3.026710000  |
| H | -0.897824000 | 3.029753000  | -7.961539000 |
| H | -0.897824000 | -3.029753000 | 7.961539000  |
| H | -1.383150000 | 5.612361000  | 5.609618000  |
| H | -1.383150000 | -5.612361000 | -5.609618000 |
| H | -1.407470000 | 5.839959000  | -1.842268000 |
| H | -1.407470000 | -5.839959000 | 1.842268000  |
| H | -1.410308000 | 1.842186000  | -5.837294000 |
| H | -1.410308000 | -1.842186000 | 5.837294000  |
| H | -1.459270000 | 3.200859000  | 8.753301000  |
| H | -1.459270000 | -3.200859000 | -8.753301000 |
| H | -1.465735000 | 8.755395000  | 3.194484000  |
| H | -1.465735000 | -8.755395000 | -3.194484000 |
| H | -2.761279000 | 0.982396000  | 5.295124000  |
| H | -2.761279000 | -0.982396000 | -5.295124000 |
| H | -2.762764000 | 5.293545000  | 0.978811000  |
| H | -2.762764000 | -5.293545000 | -0.978811000 |
| H | -3.286543000 | 2.156955000  | 7.418843000  |
| H | -3.286543000 | -2.156955000 | -7.418843000 |
| H | -3.290882000 | 7.418227000  | 2.150396000  |
| H | -3.290882000 | -7.418227000 | -2.150396000 |
| H | -3.424052000 | 2.409684000  | 2.410861000  |
| H | -3.424052000 | -2.409684000 | -2.410861000 |
| H | -3.862803000 | 5.443806000  | 5.441938000  |
| H | -3.862803000 | -5.443806000 | -5.441938000 |
| H | -4.885883000 | 3.835180000  | 3.835257000  |
| H | -4.885883000 | -3.835180000 | -3.835257000 |
| N | 0.000000000  | 0.000000000  | 1.990182000  |
| N | 0.000000000  | 0.000000000  | -1.990182000 |
| N | 0.000000000  | 1.990359000  | 0.000000000  |
| N | 0.000000000  | -1.990359000 | 0.000000000  |

7. Pt(DPP]; S = 0 (saddled)

|    |             |              |              |
|----|-------------|--------------|--------------|
| Pt | 0.000000000 | 0.000000000  | -0.030573000 |
| C  | 0.000000000 | 0.000000000  | 3.397325000  |
| C  | 0.000000000 | 0.000000000  | 4.887768000  |
| C  | 0.000000000 | 0.000000000  | 7.690670000  |
| C  | 0.000000000 | 0.000000000  | -3.474396000 |
| C  | 0.000000000 | 0.000000000  | -4.962725000 |
| C  | 0.000000000 | 0.000000000  | -7.767307000 |
| C  | 0.562150000 | -1.069576000 | 6.990229000  |
| C  | 0.569245000 | -1.064057000 | 5.596977000  |
| C  | 0.956602000 | 0.737914000  | -7.066411000 |
| C  | 0.958414000 | 0.733021000  | -5.673313000 |
| C  | 1.127038000 | -0.512487000 | -2.813242000 |
| C  | 1.234669000 | 0.114564000  | 2.742910000  |
| C  | 1.475195000 | -2.861093000 | -5.050433000 |
| C  | 1.603943000 | -3.583457000 | -6.235942000 |
| C  | 2.284582000 | -1.145962000 | -3.429750000 |
| C  | 2.375194000 | -1.830344000 | -4.735890000 |
| C  | 2.400462000 | 2.261976000  | 4.940471000  |
| C  | 2.519990000 | 0.331744000  | 3.385787000  |
| C  | 2.636002000 | -3.288689000 | -7.130653000 |
| C  | 2.703038000 | -0.666029000 | -1.243808000 |
| C  | 2.755962000 | 2.923446000  | 6.115499000  |
| C  | 2.809852000 | -0.181087000 | 1.182847000  |
| C  | 2.811891000 | 0.939739000  | 4.705531000  |
| C  | 3.267057000 | -1.204645000 | -2.464768000 |
| C  | 3.403954000 | -1.541748000 | -5.644416000 |
| C  | 3.413414000 | -0.438342000 | -0.053346000 |
| C  | 3.488502000 | 0.081548000  | 2.440139000  |
| C  | 3.530400000 | 2.273329000  | 7.079623000  |
| C  | 3.534465000 | -2.262590000 | -6.830551000 |
| C  | 3.584212000 | 0.297069000  | 5.682363000  |
| C  | 3.939722000 | 0.956637000  | 6.858820000  |
| C  | 4.537184000 | -1.959254000 | -2.585155000 |
| C  | 4.604363000 | -3.257012000 | -2.054781000 |
| C  | 4.893283000 | -0.267553000 | -0.208507000 |
| C  | 4.934671000 | 0.048443000  | 2.766319000  |
| C  | 5.337172000 | 0.924528000  | -0.799300000 |
| C  | 5.477070000 | -1.121133000 | 3.320521000  |
| C  | 5.662026000 | -1.439404000 | -3.236479000 |
| C  | 5.757702000 | 1.170611000  | 2.621202000  |
| C  | 5.772768000 | -4.011187000 | -2.163229000 |
| C  | 5.836393000 | -1.223413000 | 0.182000000  |
| C  | 6.700088000 | 1.163209000  | -0.983083000 |
| C  | 6.817100000 | -1.178209000 | 3.700171000  |
| C  | 6.832645000 | -2.190036000 | -3.342419000 |
| C  | 6.893051000 | -3.478002000 | -2.805191000 |
| C  | 7.099957000 | 1.115368000  | 2.998595000  |
| C  | 7.197646000 | -0.990362000 | -0.007218000 |
| C  | 7.633714000 | 0.204143000  | -0.586729000 |

|   |              |              |              |
|---|--------------|--------------|--------------|
| C | 7.635042000  | -0.057946000 | 3.535976000  |
| C | -0.562150000 | 1.069576000  | 6.990229000  |
| C | -0.569245000 | 1.064057000  | 5.596977000  |
| C | -0.956602000 | -0.737914000 | -7.066411000 |
| C | -0.958414000 | -0.733021000 | -5.673313000 |
| C | -1.127038000 | 0.512487000  | -2.813242000 |
| C | -1.234669000 | -0.114564000 | 2.742910000  |
| C | -1.475195000 | 2.861093000  | -5.050433000 |
| C | -1.603943000 | 3.583457000  | -6.235942000 |
| C | -2.284582000 | 1.145962000  | -3.429750000 |
| C | -2.375194000 | 1.830344000  | -4.735890000 |
| C | -2.400462000 | -2.261976000 | 4.940471000  |
| C | -2.519990000 | -0.331744000 | 3.385787000  |
| C | -2.636002000 | 3.288689000  | -7.130653000 |
| C | -2.703038000 | 0.666029000  | -1.243808000 |
| C | -2.755962000 | -2.923446000 | 6.115499000  |
| C | -2.809852000 | 0.181087000  | 1.182847000  |
| C | -2.811891000 | -0.939739000 | 4.705531000  |
| C | -3.267057000 | 1.204645000  | -2.464768000 |
| C | -3.403954000 | 1.541748000  | -5.644416000 |
| C | -3.413414000 | 0.438342000  | -0.053346000 |
| C | -3.488502000 | -0.081548000 | 2.440139000  |
| C | -3.530400000 | -2.273329000 | 7.079623000  |
| C | -3.534465000 | 2.262590000  | -6.830551000 |
| C | -3.584212000 | -0.297069000 | 5.682363000  |
| C | -3.939722000 | -0.956637000 | 6.858820000  |
| C | -4.537184000 | 1.959254000  | -2.585155000 |
| C | -4.604363000 | 3.257012000  | -2.054781000 |
| C | -4.893283000 | 0.267553000  | -0.208507000 |
| C | -4.934671000 | -0.048443000 | 2.766319000  |
| C | -5.337172000 | -0.924528000 | -0.799300000 |
| C | -5.477070000 | 1.121133000  | 3.320521000  |
| C | -5.662026000 | 1.439404000  | -3.236479000 |
| C | -5.757702000 | -1.170611000 | 2.621202000  |
| C | -5.772768000 | 4.011187000  | -2.163229000 |
| C | -5.836393000 | 1.223413000  | 0.182000000  |
| C | -6.700088000 | -1.163209000 | -0.983083000 |
| C | -6.817100000 | 1.178209000  | 3.700171000  |
| C | -6.832645000 | 2.190036000  | -3.342419000 |
| C | -6.893051000 | 3.478002000  | -2.805191000 |
| C | -7.099957000 | -1.115368000 | 2.998595000  |
| C | -7.197646000 | 0.990362000  | -0.007218000 |
| C | -7.633714000 | -0.204143000 | -0.586729000 |
| C | -7.635042000 | 0.057946000  | 3.535976000  |
| H | 0.000000000  | 0.000000000  | 8.780365000  |
| H | 0.000000000  | 0.000000000  | -8.857017000 |
| H | 0.672344000  | -3.093106000 | -4.350364000 |
| H | 0.896122000  | -4.380765000 | -6.460826000 |
| H | 0.999382000  | -1.907984000 | 7.531341000  |
| H | 1.013098000  | -1.891270000 | 5.042630000  |
| H | 1.704382000  | 1.316932000  | -7.607166000 |

|   |              |              |              |
|---|--------------|--------------|--------------|
| H | 1.704887000  | 1.302853000  | -5.119707000 |
| H | 1.800565000  | 2.769661000  | 4.184551000  |
| H | 2.428485000  | 3.950251000  | 6.276604000  |
| H | 2.737231000  | -3.853867000 | -8.056977000 |
| H | 3.728745000  | -3.666748000 | -1.551004000 |
| H | 3.811688000  | 2.789293000  | 7.997504000  |
| H | 3.902335000  | -0.730338000 | 5.518681000  |
| H | 4.094027000  | -0.730835000 | -5.422350000 |
| H | 4.339283000  | -2.019544000 | -7.523683000 |
| H | 4.539669000  | 0.437833000  | 7.605779000  |
| H | 4.600248000  | 1.665575000  | -1.110743000 |
| H | 4.833357000  | -1.992649000 | 3.441237000  |
| H | 5.340302000  | 2.084825000  | 2.201816000  |
| H | 5.495859000  | -2.157744000 | 0.623671000  |
| H | 5.625526000  | -0.424653000 | -3.629150000 |
| H | 5.807096000  | -5.017694000 | -1.747108000 |
| H | 7.030017000  | 2.097319000  | -1.437186000 |
| H | 7.222399000  | -2.096602000 | 4.124145000  |
| H | 7.703263000  | -1.763824000 | -3.839706000 |
| H | 7.730381000  | 1.994853000  | 2.873368000  |
| H | 7.808421000  | -4.063747000 | -2.887847000 |
| H | 7.919513000  | -1.746440000 | 0.297672000  |
| H | 8.683974000  | -0.097178000 | 3.829084000  |
| H | 8.699020000  | 0.384039000  | -0.730927000 |
| H | -0.672344000 | 3.093106000  | -4.350364000 |
| H | -0.896122000 | 4.380765000  | -6.460826000 |
| H | -0.999382000 | 1.907984000  | 7.531341000  |
| H | -1.013098000 | 1.891270000  | 5.042630000  |
| H | -1.704382000 | -1.316932000 | -7.607166000 |
| H | -1.704887000 | -1.302853000 | -5.119707000 |
| H | -1.800565000 | -2.769661000 | 4.184551000  |
| H | -2.428485000 | -3.950251000 | 6.276604000  |
| H | -2.737231000 | 3.853867000  | -8.056977000 |
| H | -3.728745000 | 3.666748000  | -1.551004000 |
| H | -3.811688000 | -2.789293000 | 7.997504000  |
| H | -3.902335000 | 0.730338000  | 5.518681000  |
| H | -4.094027000 | 0.730835000  | -5.422350000 |
| H | -4.339283000 | 2.019544000  | -7.523683000 |
| H | -4.539669000 | -0.437833000 | 7.605779000  |
| H | -4.600248000 | -1.665575000 | -1.110743000 |
| H | -4.833357000 | 1.992649000  | 3.441237000  |
| H | -5.340302000 | -2.084825000 | 2.201816000  |
| H | -5.495859000 | 2.157744000  | 0.623671000  |
| H | -5.625526000 | 0.424653000  | -3.629150000 |
| H | -5.807096000 | 5.017694000  | -1.747108000 |
| H | -7.030017000 | -2.097319000 | -1.437186000 |
| H | -7.222399000 | 2.096602000  | 4.124145000  |
| H | -7.703263000 | 1.763824000  | -3.839706000 |
| H | -7.730381000 | -1.994853000 | 2.873368000  |
| H | -7.808421000 | 4.063747000  | -2.887847000 |
| H | -7.919513000 | 1.746440000  | 0.297672000  |

|   |              |              |              |
|---|--------------|--------------|--------------|
| H | -8.683974000 | 0.097178000  | 3.829084000  |
| H | -8.699020000 | -0.384039000 | -0.730927000 |
| N | 1.380790000  | -0.335862000 | -1.461152000 |
| N | 1.438253000  | -0.131099000 | 1.395991000  |
| N | -1.380790000 | 0.335862000  | -1.461152000 |
| N | -1.438253000 | 0.131099000  | 1.395991000  |

**8. Pt(DPP]; S = 0 (ruffled)**

|    |             |              |              |
|----|-------------|--------------|--------------|
| Pt | 0.000000000 | 0.000000000  | 0.000000000  |
| C  | 0.121349000 | 2.592330000  | 7.377856000  |
| C  | 0.121349000 | -2.592330000 | -7.377856000 |
| C  | 0.128746000 | 7.374092000  | 2.597150000  |
| C  | 0.128746000 | -7.374092000 | -2.597150000 |
| C  | 0.301179000 | 4.180208000  | -0.620308000 |
| C  | 0.301179000 | -4.180208000 | 0.620308000  |
| C  | 0.302009000 | 0.619932000  | -4.180294000 |
| C  | 0.302009000 | -0.619932000 | 4.180294000  |
| C  | 0.403711000 | 1.924329000  | 6.186111000  |
| C  | 0.403711000 | -1.924329000 | -6.186111000 |
| C  | 0.408419000 | 6.182334000  | 1.928057000  |
| C  | 0.408419000 | -6.182334000 | -1.928057000 |
| C  | 0.432427000 | 2.793586000  | -1.037833000 |
| C  | 0.432427000 | -2.793586000 | 1.037833000  |
| C  | 0.433138000 | 1.037552000  | -2.793669000 |
| C  | 0.433138000 | -1.037552000 | 2.793669000  |
| C  | 0.623414000 | 5.424076000  | -1.356913000 |
| C  | 0.623414000 | -5.424076000 | 1.356913000  |
| C  | 0.626609000 | 1.355504000  | -5.424086000 |
| C  | 0.626609000 | -1.355504000 | 5.424086000  |
| C  | 0.770321000 | 2.322079000  | -2.322174000 |
| C  | 0.770321000 | -2.322079000 | 2.322174000  |
| C  | 1.003208000 | 4.119885000  | -4.121168000 |
| C  | 1.003208000 | -4.119885000 | 4.121168000  |
| C  | 1.187521000 | 7.831006000  | -2.691813000 |
| C  | 1.187521000 | -7.831006000 | 2.691813000  |
| C  | 1.196144000 | 2.688200000  | -7.830976000 |
| C  | 1.196144000 | -2.688200000 | 7.830976000  |
| C  | 1.570078000 | 3.216502000  | -3.215926000 |
| C  | 1.570078000 | -3.216502000 | 3.215926000  |
| C  | 1.817246000 | 4.920491000  | -4.920769000 |
| C  | 1.817246000 | -4.920491000 | 4.920769000  |
| C  | 1.938191000 | 5.901471000  | -1.438269000 |
| C  | 1.938191000 | -5.901471000 | 1.438269000  |
| C  | 1.942724000 | 1.438111000  | -5.897660000 |
| C  | 1.942724000 | -1.438111000 | 5.897660000  |
| C  | 2.219298000 | 7.093584000  | -2.104599000 |
| C  | 2.219298000 | -7.093584000 | 2.104599000  |
| C  | 2.226510000 | 2.103310000  | -7.089731000 |
| C  | 2.226510000 | -2.103310000 | 7.089731000  |

|   |              |              |              |
|---|--------------|--------------|--------------|
| C | 2.965498000  | 3.127295000  | -3.123931000 |
| C | 2.965498000  | -3.127295000 | 3.123931000  |
| C | 3.208358000  | 4.827072000  | -4.824632000 |
| C | 3.208358000  | -4.827072000 | 4.824632000  |
| C | 3.782688000  | 3.928545000  | -3.924303000 |
| C | 3.782688000  | -3.928545000 | 3.924303000  |
| C | -0.121349000 | 2.592330000  | -7.377856000 |
| C | -0.121349000 | -2.592330000 | 7.377856000  |
| C | -0.128746000 | 7.374092000  | -2.597150000 |
| C | -0.128746000 | -7.374092000 | 2.597150000  |
| C | -0.301179000 | 4.180208000  | 0.620308000  |
| C | -0.301179000 | -4.180208000 | -0.620308000 |
| C | -0.302009000 | 0.619932000  | 4.180294000  |
| C | -0.302009000 | -0.619932000 | -4.180294000 |
| C | -0.403711000 | 1.924329000  | -6.186111000 |
| C | -0.403711000 | -1.924329000 | 6.186111000  |
| C | -0.408419000 | 6.182334000  | -1.928057000 |
| C | -0.408419000 | -6.182334000 | 1.928057000  |
| C | -0.432427000 | 2.793586000  | 1.037833000  |
| C | -0.432427000 | -2.793586000 | -1.037833000 |
| C | -0.433138000 | 1.037552000  | 2.793669000  |
| C | -0.433138000 | -1.037552000 | -2.793669000 |
| C | -0.623414000 | 5.424076000  | 1.356913000  |
| C | -0.623414000 | -5.424076000 | -1.356913000 |
| C | -0.626609000 | 1.355504000  | 5.424086000  |
| C | -0.626609000 | -1.355504000 | -5.424086000 |
| C | -0.770321000 | 2.322079000  | 2.322174000  |
| C | -0.770321000 | -2.322079000 | -2.322174000 |
| C | -1.003208000 | 4.119885000  | 4.121168000  |
| C | -1.003208000 | -4.119885000 | -4.121168000 |
| C | -1.187521000 | 7.831006000  | 2.691813000  |
| C | -1.187521000 | -7.831006000 | -2.691813000 |
| C | -1.196144000 | 2.688200000  | 7.830976000  |
| C | -1.196144000 | -2.688200000 | -7.830976000 |
| C | -1.570078000 | 3.216502000  | 3.215926000  |
| C | -1.570078000 | -3.216502000 | -3.215926000 |
| C | -1.817246000 | 4.920491000  | 4.920769000  |
| C | -1.817246000 | -4.920491000 | -4.920769000 |
| C | -1.938191000 | 5.901471000  | 1.438269000  |
| C | -1.938191000 | -5.901471000 | -1.438269000 |
| C | -1.942724000 | 1.438111000  | 5.897660000  |
| C | -1.942724000 | -1.438111000 | -5.897660000 |
| C | -2.219298000 | 7.093584000  | 2.104599000  |
| C | -2.219298000 | -7.093584000 | -2.104599000 |
| C | -2.226510000 | 2.103310000  | 7.089731000  |
| C | -2.226510000 | -2.103310000 | -7.089731000 |
| C | -2.965498000 | 3.127295000  | 3.123931000  |
| C | -2.965498000 | -3.127295000 | -3.123931000 |
| C | -3.208358000 | 4.827072000  | 4.824632000  |
| C | -3.208358000 | -4.827072000 | -4.824632000 |
| C | -3.782688000 | 3.928545000  | 3.924303000  |

|   |              |              |              |
|---|--------------|--------------|--------------|
| C | -3.782688000 | -3.928545000 | -3.924303000 |
| H | 0.080227000  | 4.191229000  | 4.194693000  |
| H | 0.080227000  | -4.191229000 | -4.194693000 |
| H | 0.932563000  | 3.035254000  | 7.954922000  |
| H | 0.932563000  | -3.035254000 | -7.954922000 |
| H | 0.941100000  | 7.948156000  | 3.041935000  |
| H | 0.941100000  | -7.948156000 | -3.041935000 |
| H | 1.362485000  | 5.619340000  | -5.620971000 |
| H | 1.362485000  | -5.619340000 | 5.620971000  |
| H | 1.408695000  | 8.760541000  | -3.216113000 |
| H | 1.408695000  | -8.760541000 | 3.216113000  |
| H | 1.419349000  | 3.211634000  | -8.760505000 |
| H | 1.419349000  | -3.211634000 | 8.760505000  |
| H | 1.429880000  | 1.844482000  | 5.828463000  |
| H | 1.429880000  | -1.844482000 | -5.828463000 |
| H | 1.433620000  | 5.821657000  | 1.849180000  |
| H | 1.433620000  | -5.821657000 | -1.849180000 |
| H | 2.742564000  | 5.319636000  | -0.989641000 |
| H | 2.742564000  | -5.319636000 | 0.989641000  |
| H | 2.745967000  | 0.991333000  | -5.312854000 |
| H | 2.745967000  | -0.991333000 | 5.312854000  |
| H | 3.248326000  | 7.445199000  | -2.169841000 |
| H | 3.248326000  | -7.445199000 | 2.169841000  |
| H | 3.256504000  | 2.169539000  | -7.438288000 |
| H | 3.256504000  | -2.169539000 | 7.438288000  |
| H | 3.405223000  | 2.422377000  | -2.417505000 |
| H | 3.405223000  | -2.422377000 | 2.417505000  |
| H | 3.842193000  | 5.454446000  | -5.451278000 |
| H | 3.842193000  | -5.454446000 | 5.451278000  |
| H | 4.866532000  | 3.848864000  | -3.842420000 |
| H | 4.866532000  | -3.848864000 | 3.842420000  |
| H | -0.080227000 | 4.191229000  | -4.194693000 |
| H | -0.080227000 | -4.191229000 | 4.194693000  |
| H | -0.932563000 | 3.035254000  | -7.954922000 |
| H | -0.932563000 | -3.035254000 | 7.954922000  |
| H | -0.941100000 | 7.948156000  | -3.041935000 |
| H | -0.941100000 | -7.948156000 | 3.041935000  |
| H | -1.362485000 | 5.619340000  | 5.620971000  |
| H | -1.362485000 | -5.619340000 | -5.620971000 |
| H | -1.408695000 | 8.760541000  | 3.216113000  |
| H | -1.408695000 | -8.760541000 | -3.216113000 |
| H | -1.419349000 | 3.211634000  | 8.760505000  |
| H | -1.419349000 | -3.211634000 | -8.760505000 |
| H | -1.429880000 | 1.844482000  | -5.828463000 |
| H | -1.429880000 | -1.844482000 | 5.828463000  |
| H | -1.433620000 | 5.821657000  | -1.849180000 |
| H | -1.433620000 | -5.821657000 | 1.849180000  |
| H | -2.742564000 | 5.319636000  | 0.989641000  |
| H | -2.742564000 | -5.319636000 | -0.989641000 |
| H | -2.745967000 | 0.991333000  | 5.312854000  |
| H | -2.745967000 | -0.991333000 | -5.312854000 |



|   |              |              |              |
|---|--------------|--------------|--------------|
| H | -3.248326000 | 7.445199000  | 2.169841000  |
| H | -3.248326000 | -7.445199000 | -2.169841000 |
| H | -3.256504000 | 2.169539000  | 7.438288000  |
| H | -3.256504000 | -2.169539000 | -7.438288000 |
| H | -3.405223000 | 2.422377000  | 2.417505000  |
| H | -3.405223000 | -2.422377000 | -2.417505000 |
| H | -3.842193000 | 5.454446000  | 5.451278000  |
| H | -3.842193000 | -5.454446000 | -5.451278000 |
| H | -4.866532000 | 3.848864000  | 3.842420000  |
| H | -4.866532000 | -3.848864000 | -3.842420000 |
| N | 0.000000000  | 0.000000000  | 1.994187000  |
| N | 0.000000000  | 0.000000000  | -1.994187000 |
| N | 0.000000000  | 1.994103000  | 0.000000000  |
| N | 0.000000000  | -1.994103000 | 0.000000000  |

### 9. Zn(DPP]; S = 0 (saddled)

|    |             |              |              |
|----|-------------|--------------|--------------|
| Zn | 0.000000000 | 0.000000000  | -0.023670000 |
| C  | 0.000000000 | 0.000000000  | 3.406913000  |
| C  | 0.000000000 | 0.000000000  | 4.897366000  |
| C  | 0.000000000 | 0.000000000  | 7.701430000  |
| C  | 0.000000000 | 0.000000000  | -3.488451000 |
| C  | 0.000000000 | 0.000000000  | -4.976242000 |
| C  | 0.000000000 | 0.000000000  | -7.781883000 |
| C  | 0.509612000 | -1.095362000 | 7.000775000  |
| C  | 0.515841000 | -1.090406000 | 5.607515000  |
| C  | 0.928373000 | 0.772940000  | -7.080837000 |
| C  | 0.930369000 | 0.767808000  | -5.687826000 |
| C  | 1.155134000 | -0.473559000 | -2.831390000 |
| C  | 1.251051000 | 0.064619000  | 2.759509000  |
| C  | 1.600433000 | -2.795378000 | -5.118935000 |
| C  | 1.767738000 | -3.489287000 | -6.316828000 |
| C  | 2.325374000 | -1.076373000 | -3.460614000 |
| C  | 2.451146000 | -1.731412000 | -4.780023000 |
| C  | 2.538041000 | 2.094632000  | 5.059321000  |
| C  | 2.541216000 | 0.228166000  | 3.418186000  |
| C  | 2.723056000 | -0.618936000 | -1.266065000 |
| C  | 2.790139000 | -3.132189000 | -7.199619000 |
| C  | 2.817929000 | -0.214309000 | 1.198092000  |
| C  | 2.869374000 | 0.763023000  | 4.762002000  |
| C  | 2.940841000 | 2.681204000  | 6.258946000  |
| C  | 3.308347000 | -1.129504000 | -2.492055000 |
| C  | 3.422107000 | -0.425106000 | -0.053857000 |
| C  | 3.471470000 | -1.381122000 | -5.676525000 |
| C  | 3.506869000 | -0.010718000 | 2.462838000  |
| C  | 3.612531000 | 0.034505000  | 5.700974000  |
| C  | 3.640208000 | -2.072744000 | -6.875029000 |
| C  | 3.684490000 | 1.945548000  | 7.184851000  |
| C  | 4.015665000 | 0.618803000  | 6.901361000  |
| C  | 4.600580000 | -1.840380000 | -2.640670000 |

|   |              |              |              |
|---|--------------|--------------|--------------|
| C | 4.704017000  | -3.163043000 | -2.183070000 |
| C | 4.901693000  | -0.233571000 | -0.192612000 |
| C | 4.950198000  | -0.092350000 | 2.793658000  |
| C | 5.337233000  | 0.994880000  | -0.710909000 |
| C | 5.469623000  | -1.307342000 | 3.266484000  |
| C | 5.712463000  | -1.252547000 | -3.256115000 |
| C | 5.792347000  | 1.023589000  | 2.734335000  |
| C | 5.853679000  | -1.200480000 | 0.146269000  |
| C | 5.895647000  | -3.874569000 | -2.324062000 |
| C | 6.698693000  | 1.257765000  | -0.872967000 |
| C | 6.806215000  | -1.413751000 | 3.647679000  |
| C | 6.905813000  | -1.960537000 | -3.394492000 |
| C | 7.002787000  | -3.273548000 | -2.927456000 |
| C | 7.131211000  | 0.918741000  | 3.112879000  |
| C | 7.213388000  | -0.943550000 | -0.021352000 |
| C | 7.640316000  | 0.286930000  | -0.527695000 |
| C | 7.643833000  | -0.298827000 | 3.567401000  |
| C | -0.509612000 | 1.095362000  | 7.000775000  |
| C | -0.515841000 | 1.090406000  | 5.607515000  |
| C | -0.928373000 | -0.772940000 | -7.080837000 |
| C | -0.930369000 | -0.767808000 | -5.687826000 |
| C | -1.155134000 | 0.473559000  | -2.831390000 |
| C | -1.251051000 | -0.064619000 | 2.759509000  |
| C | -1.600433000 | 2.795378000  | -5.118935000 |
| C | -1.767738000 | 3.489287000  | -6.316828000 |
| C | -2.325374000 | 1.076373000  | -3.460614000 |
| C | -2.451146000 | 1.731412000  | -4.780023000 |
| C | -2.538041000 | -2.094632000 | 5.059321000  |
| C | -2.541216000 | -0.228166000 | 3.418186000  |
| C | -2.723056000 | 0.618936000  | -1.266065000 |
| C | -2.790139000 | 3.132189000  | -7.199619000 |
| C | -2.817929000 | 0.214309000  | 1.198092000  |
| C | -2.869374000 | -0.763023000 | 4.762002000  |
| C | -2.940841000 | -2.681204000 | 6.258946000  |
| C | -3.308347000 | 1.129504000  | -2.492055000 |
| C | -3.422107000 | 0.425106000  | -0.053857000 |
| C | -3.471470000 | 1.381122000  | -5.676525000 |
| C | -3.506869000 | 0.010718000  | 2.462838000  |
| C | -3.612531000 | -0.034505000 | 5.700974000  |
| C | -3.640208000 | 2.072744000  | -6.875029000 |
| C | -3.684490000 | -1.945548000 | 7.184851000  |
| C | -4.015665000 | -0.618803000 | 6.901361000  |
| C | -4.600580000 | 1.840380000  | -2.640670000 |
| C | -4.704017000 | 3.163043000  | -2.183070000 |
| C | -4.901693000 | 0.233571000  | -0.192612000 |
| C | -4.950198000 | 0.092350000  | 2.793658000  |
| C | -5.337233000 | -0.994880000 | -0.710909000 |
| C | -5.469623000 | 1.307342000  | 3.266484000  |
| C | -5.712463000 | 1.252547000  | -3.256115000 |
| C | -5.792347000 | -1.023589000 | 2.734335000  |
| C | -5.853679000 | 1.200480000  | 0.146269000  |

|   |              |              |              |
|---|--------------|--------------|--------------|
| C | -5.895647000 | 3.874569000  | -2.324062000 |
| C | -6.698693000 | -1.257765000 | -0.872967000 |
| C | -6.806215000 | 1.413751000  | 3.647679000  |
| C | -6.905813000 | 1.960537000  | -3.394492000 |
| C | -7.002787000 | 3.273548000  | -2.927456000 |
| C | -7.131211000 | -0.918741000 | 3.112879000  |
| C | -7.213388000 | 0.943550000  | -0.021352000 |
| C | -7.640316000 | -0.286930000 | -0.527695000 |
| C | -7.643833000 | 0.298827000  | 3.567401000  |
| H | 0.000000000  | 0.000000000  | 8.791155000  |
| H | 0.000000000  | 0.000000000  | -8.871594000 |
| H | 0.804612000  | -3.075908000 | -4.428718000 |
| H | 0.906738000  | -1.953548000 | 7.541805000  |
| H | 0.918881000  | -1.938531000 | 5.053552000  |
| H | 1.097309000  | -4.312911000 | -6.560738000 |
| H | 1.654274000  | 1.379218000  | -7.621512000 |
| H | 1.655081000  | 1.365294000  | -5.134479000 |
| H | 1.962679000  | 2.669969000  | 4.333442000  |
| H | 2.674174000  | 3.716758000  | 6.468944000  |
| H | 2.921752000  | -3.675093000 | -8.135382000 |
| H | 3.838445000  | -3.626912000 | -1.709769000 |
| H | 3.871748000  | -1.000318000 | 5.486678000  |
| H | 4.002960000  | 2.403179000  | 8.121345000  |
| H | 4.125359000  | -0.546248000 | -5.433989000 |
| H | 4.437709000  | -1.781752000 | -7.558096000 |
| H | 4.592184000  | 0.033922000  | 7.617342000  |
| H | 4.594994000  | 1.746109000  | -0.983090000 |
| H | 4.810945000  | -2.174216000 | 3.322670000  |
| H | 5.392763000  | 1.972546000  | 2.379730000  |
| H | 5.521239000  | -2.162441000 | 0.530716000  |
| H | 5.646321000  | -0.220100000 | -3.595569000 |
| H | 5.958271000  | -4.901003000 | -1.963590000 |
| H | 7.020867000  | 2.220046000  | -1.270387000 |
| H | 7.193574000  | -2.366716000 | 4.007314000  |
| H | 7.765486000  | -1.481870000 | -3.862246000 |
| H | 7.776822000  | 1.794129000  | 3.053645000  |
| H | 7.936010000  | -3.826060000 | -3.035384000 |
| H | 7.941025000  | -1.709196000 | 0.243225000  |
| H | 8.690250000  | -0.376628000 | 3.861823000  |
| H | 8.704401000  | 0.485675000  | -0.655122000 |
| H | -0.804612000 | 3.075908000  | -4.428718000 |
| H | -0.906738000 | 1.953548000  | 7.541805000  |
| H | -0.918881000 | 1.938531000  | 5.053552000  |
| H | -1.097309000 | 4.312911000  | -6.560738000 |
| H | -1.654274000 | -1.379218000 | -7.621512000 |
| H | -1.655081000 | -1.365294000 | -5.134479000 |
| H | -1.962679000 | -2.669969000 | 4.333442000  |
| H | -2.674174000 | -3.716758000 | 6.468944000  |
| H | -2.921752000 | 3.675093000  | -8.135382000 |
| H | -3.838445000 | 3.626912000  | -1.709769000 |
| H | -3.871748000 | 1.000318000  | 5.486678000  |

|   |              |              |              |
|---|--------------|--------------|--------------|
| H | -4.002960000 | -2.403179000 | 8.121345000  |
| H | -4.125359000 | 0.546248000  | -5.433989000 |
| H | -4.437709000 | 1.781752000  | -7.558096000 |
| H | -4.592184000 | -0.033922000 | 7.617342000  |
| H | -4.594994000 | -1.746109000 | -0.983090000 |
| H | -4.810945000 | 2.174216000  | 3.322670000  |
| H | -5.392763000 | -1.972546000 | 2.379730000  |
| H | -5.521239000 | 2.162441000  | 0.530716000  |
| H | -5.646321000 | 0.220100000  | -3.595569000 |
| H | -5.958271000 | 4.901003000  | -1.963590000 |
| H | -7.020867000 | -2.220046000 | -1.270387000 |
| H | -7.193574000 | 2.366716000  | 4.007314000  |
| H | -7.765486000 | 1.481870000  | -3.862246000 |
| H | -7.776822000 | -1.794129000 | 3.053645000  |
| H | -7.936010000 | 3.826060000  | -3.035384000 |
| H | -7.941025000 | 1.709196000  | 0.243225000  |
| H | -8.690250000 | 0.376628000  | 3.861823000  |
| H | -8.704401000 | -0.485675000 | -0.655122000 |
| N | 1.405037000  | -0.294289000 | -1.485003000 |
| N | 1.452759000  | -0.152219000 | 1.412400000  |
| N | -1.405037000 | 0.294289000  | -1.485003000 |
| N | -1.452759000 | 0.152219000  | 1.412400000  |

#### 10. Zn(DPP]; S = 0 (ruffled)

|    |             |              |              |
|----|-------------|--------------|--------------|
| Zn | 0.000000000 | 0.000000000  | 0.000000000  |
| C  | 0.247410000 | 2.602673000  | 7.389006000  |
| C  | 0.247410000 | -2.602673000 | -7.389006000 |
| C  | 0.261975000 | 7.382930000  | 2.609100000  |
| C  | 0.261975000 | -7.382930000 | -2.609100000 |
| C  | 0.275942000 | 4.205531000  | -0.632838000 |
| C  | 0.275942000 | -4.205531000 | 0.632838000  |
| C  | 0.277153000 | 0.632327000  | -4.205380000 |
| C  | 0.277153000 | -0.632327000 | 4.205380000  |
| C  | 0.392847000 | 2.813777000  | -1.046487000 |
| C  | 0.392847000 | -2.813777000 | 1.046487000  |
| C  | 0.393655000 | 1.046218000  | -2.813657000 |
| C  | 0.393655000 | -1.046218000 | 2.813657000  |
| C  | 0.491981000 | 1.926155000  | 6.193860000  |
| C  | 0.491981000 | -1.926155000 | -6.193860000 |
| C  | 0.501188000 | 6.188272000  | 1.929796000  |
| C  | 0.501188000 | -6.188272000 | -1.929796000 |
| C  | 0.559102000 | 5.452727000  | -1.380585000 |
| C  | 0.559102000 | -5.452727000 | 1.380585000  |
| C  | 0.564949000 | 1.377860000  | -5.452845000 |
| C  | 0.564949000 | -1.377860000 | 5.452845000  |
| C  | 0.709992000 | 2.340732000  | -2.340747000 |
| C  | 0.709992000 | -2.340732000 | 2.340747000  |
| C  | 0.876480000 | 4.141851000  | -4.144309000 |
| C  | 0.876480000 | -4.141851000 | 4.144309000  |

|   |              |              |              |
|---|--------------|--------------|--------------|
| C | 1.042008000  | 7.866574000  | -2.736061000 |
| C | 1.042008000  | -7.866574000 | 2.736061000  |
| C | 1.058605000  | 2.727709000  | -7.867661000 |
| C | 1.058605000  | -2.727709000 | 7.867661000  |
| C | 1.476697000  | 3.249844000  | -3.249306000 |
| C | 1.476697000  | -3.249844000 | 3.249306000  |
| C | 1.659571000  | 4.957450000  | -4.959540000 |
| C | 1.659571000  | -4.957450000 | 4.959540000  |
| C | 1.861211000  | 5.957197000  | -1.493953000 |
| C | 1.861211000  | -5.957197000 | 1.493953000  |
| C | 1.869200000  | 1.489302000  | -5.952285000 |
| C | 1.869200000  | -1.489302000 | 5.952285000  |
| C | 2.101870000  | 7.152490000  | -2.170608000 |
| C | 2.101870000  | -7.152490000 | 2.170608000  |
| C | 2.115213000  | 2.163187000  | -7.148036000 |
| C | 2.115213000  | -2.163187000 | 7.148036000  |
| C | 2.875179000  | 3.188632000  | -3.184253000 |
| C | 2.875179000  | -3.188632000 | 3.184253000  |
| C | 3.053756000  | 4.891220000  | -4.889767000 |
| C | 3.053756000  | -4.891220000 | 4.889767000  |
| C | 3.661924000  | 4.004708000  | -3.999934000 |
| C | 3.661924000  | -4.004708000 | 3.999934000  |
| C | -0.247410000 | 2.602673000  | -7.389006000 |
| C | -0.247410000 | -2.602673000 | 7.389006000  |
| C | -0.261975000 | 7.382930000  | -2.609100000 |
| C | -0.261975000 | -7.382930000 | 2.609100000  |
| C | -0.275942000 | 4.205531000  | 0.632838000  |
| C | -0.275942000 | -4.205531000 | -0.632838000 |
| C | -0.277153000 | 0.632327000  | 4.205380000  |
| C | -0.277153000 | -0.632327000 | -4.205380000 |
| C | -0.392847000 | 2.813777000  | 1.046487000  |
| C | -0.392847000 | -2.813777000 | -1.046487000 |
| C | -0.393655000 | 1.046218000  | 2.813657000  |
| C | -0.393655000 | -1.046218000 | -2.813657000 |
| C | -0.491981000 | 1.926155000  | -6.193860000 |
| C | -0.491981000 | -1.926155000 | 6.193860000  |
| C | -0.501188000 | 6.188272000  | -1.929796000 |
| C | -0.501188000 | -6.188272000 | 1.929796000  |
| C | -0.559102000 | 5.452727000  | 1.380585000  |
| C | -0.559102000 | -5.452727000 | -1.380585000 |
| C | -0.564949000 | 1.377860000  | 5.452845000  |
| C | -0.564949000 | -1.377860000 | -5.452845000 |
| C | -0.709992000 | 2.340732000  | 2.340747000  |
| C | -0.709992000 | -2.340732000 | -2.340747000 |
| C | -0.876480000 | 4.141851000  | 4.144309000  |
| C | -0.876480000 | -4.141851000 | -4.144309000 |
| C | -1.042008000 | 7.866574000  | 2.736061000  |
| C | -1.042008000 | -7.866574000 | -2.736061000 |
| C | -1.058605000 | 2.727709000  | 7.867661000  |
| C | -1.058605000 | -2.727709000 | -7.867661000 |
| C | -1.476697000 | 3.249844000  | 3.249306000  |

|   |              |              |              |
|---|--------------|--------------|--------------|
| C | -1.476697000 | -3.249844000 | -3.249306000 |
| C | -1.659571000 | 4.957450000  | 4.959540000  |
| C | -1.659571000 | -4.957450000 | -4.959540000 |
| C | -1.861211000 | 5.957197000  | 1.493953000  |
| C | -1.861211000 | -5.957197000 | -1.493953000 |
| C | -1.869200000 | 1.489302000  | 5.952285000  |
| C | -1.869200000 | -1.489302000 | -5.952285000 |
| C | -2.101870000 | 7.152490000  | 2.170608000  |
| C | -2.101870000 | -7.152490000 | -2.170608000 |
| C | -2.115213000 | 2.163187000  | 7.148036000  |
| C | -2.115213000 | -2.163187000 | -7.148036000 |
| C | -2.875179000 | 3.188632000  | 3.184253000  |
| C | -2.875179000 | -3.188632000 | -3.184253000 |
| C | -3.053756000 | 4.891220000  | 4.889767000  |
| C | -3.053756000 | -4.891220000 | -4.889767000 |
| C | -3.661924000 | 4.004708000  | 3.999934000  |
| C | -3.661924000 | -4.004708000 | -3.999934000 |
| H | 0.209305000  | 4.192467000  | 4.197700000  |
| H | 0.209305000  | -4.192467000 | -4.197700000 |
| H | 1.079155000  | 3.029185000  | 7.949028000  |
| H | 1.079155000  | -3.029185000 | -7.949028000 |
| H | 1.096317000  | 7.938576000  | 3.036272000  |
| H | 1.096317000  | -7.938576000 | -3.036272000 |
| H | 1.178067000  | 5.646713000  | -5.651269000 |
| H | 1.178067000  | -5.646713000 | 5.651269000  |
| H | 1.231706000  | 8.798611000  | -3.268191000 |
| H | 1.231706000  | -8.798611000 | 3.268191000  |
| H | 1.252420000  | 3.257636000  | -8.800102000 |
| H | 1.252420000  | -3.257636000 | 8.800102000  |
| H | 1.509329000  | 1.823614000  | 5.816950000  |
| H | 1.509329000  | -1.823614000 | -5.816950000 |
| H | 1.516929000  | 5.807419000  | 1.825792000  |
| H | 1.516929000  | -5.807419000 | -1.825792000 |
| H | 2.687969000  | 5.394284000  | -1.062184000 |
| H | 2.687969000  | -5.394284000 | 1.062184000  |
| H | 2.693384000  | 1.058243000  | -5.385046000 |
| H | 2.693384000  | -1.058243000 | 5.385046000  |
| H | 3.121638000  | 7.525132000  | -2.260662000 |
| H | 3.121638000  | -7.525132000 | 2.260662000  |
| H | 3.136582000  | 2.251780000  | -7.516677000 |
| H | 3.136582000  | -2.251780000 | 7.516677000  |
| H | 3.342771000  | 2.493245000  | -2.486239000 |
| H | 3.342771000  | -2.493245000 | 2.486239000  |
| H | 3.663359000  | 5.530286000  | -5.528506000 |
| H | 3.663359000  | -5.530286000 | 5.528506000  |
| H | 4.748425000  | 3.945875000  | -3.938148000 |
| H | 4.748425000  | -3.945875000 | 3.938148000  |
| H | -0.209305000 | 4.192467000  | -4.197700000 |
| H | -0.209305000 | -4.192467000 | 4.197700000  |
| H | -1.079155000 | 3.029185000  | -7.949028000 |
| H | -1.079155000 | -3.029185000 | 7.949028000  |

|   |              |              |              |
|---|--------------|--------------|--------------|
| H | -1.096317000 | 7.938576000  | -3.036272000 |
| H | -1.096317000 | -7.938576000 | 3.036272000  |
| H | -1.178067000 | 5.646713000  | 5.651269000  |
| H | -1.178067000 | -5.646713000 | -5.651269000 |
| H | -1.231706000 | 8.798611000  | 3.268191000  |
| H | -1.231706000 | -8.798611000 | -3.268191000 |
| H | -1.252420000 | 3.257636000  | 8.800102000  |
| H | -1.252420000 | -3.257636000 | -8.800102000 |
| H | -1.509329000 | 1.823614000  | -5.816950000 |
| H | -1.509329000 | -1.823614000 | 5.816950000  |
| H | -1.516929000 | 5.807419000  | -1.825792000 |
| H | -1.516929000 | -5.807419000 | 1.825792000  |
| H | -2.687969000 | 5.394284000  | 1.062184000  |
| H | -2.687969000 | -5.394284000 | -1.062184000 |
| H | -2.693384000 | 1.058243000  | 5.385046000  |
| H | -2.693384000 | -1.058243000 | -5.385046000 |
| H | -3.121638000 | 7.525132000  | 2.260662000  |
| H | -3.121638000 | -7.525132000 | -2.260662000 |
| H | -3.136582000 | 2.251780000  | 7.516677000  |
| H | -3.136582000 | -2.251780000 | -7.516677000 |
| H | -3.342771000 | 2.493245000  | 2.486239000  |
| H | -3.342771000 | -2.493245000 | -2.486239000 |
| H | -3.663359000 | 5.530286000  | 5.528506000  |
| H | -3.663359000 | -5.530286000 | -5.528506000 |
| H | -4.748425000 | 3.945875000  | 3.938148000  |
| H | -4.748425000 | -3.945875000 | -3.938148000 |
| N | 0.000000000  | 0.000000000  | 2.012617000  |
| N | 0.000000000  | 0.000000000  | -2.012617000 |
| N | 0.000000000  | 2.012823000  | 0.000000000  |
| N | 0.000000000  | -2.012823000 | 0.000000000  |

### 11. Cu[Br<sub>8</sub>TPP]; S = ½ (saddled)

|    |              |              |              |
|----|--------------|--------------|--------------|
| Cu | 0.000000000  | 0.000000000  | 0.000000000  |
| Br | 2.416674000  | 4.893563000  | 2.092269000  |
| Br | 2.416674000  | -4.893563000 | -2.092269000 |
| Br | 4.893563000  | 2.416674000  | 2.092269000  |
| Br | 4.893563000  | -2.416674000 | -2.092269000 |
| Br | -2.416674000 | 4.893563000  | -2.092269000 |
| Br | -2.416674000 | -4.893563000 | 2.092269000  |
| Br | -4.893563000 | 2.416674000  | -2.092269000 |
| Br | -4.893563000 | -2.416674000 | 2.092269000  |
| C  | 0.000000000  | 3.404387000  | 0.000000000  |
| C  | 0.000000000  | 4.887632000  | 0.000000000  |
| C  | 0.000000000  | 7.686848000  | 0.000000000  |
| C  | 0.000000000  | -3.404387000 | 0.000000000  |
| C  | 0.000000000  | -4.887632000 | 0.000000000  |
| C  | 0.000000000  | -7.686848000 | 0.000000000  |
| C  | 0.885498000  | 6.987003000  | -0.824346000 |

|   |              |              |              |
|---|--------------|--------------|--------------|
| C | 0.885498000  | -6.987003000 | 0.824346000  |
| C | 0.891629000  | 5.594356000  | -0.817074000 |
| C | 0.891629000  | -5.594356000 | 0.817074000  |
| C | 1.143840000  | 2.721803000  | 0.446208000  |
| C | 1.143840000  | -2.721803000 | -0.446208000 |
| C | 2.289280000  | 3.262520000  | 1.154182000  |
| C | 2.289280000  | -3.262520000 | -1.154182000 |
| C | 2.721803000  | 1.143840000  | 0.446208000  |
| C | 2.721803000  | -1.143840000 | -0.446208000 |
| C | 3.262520000  | 2.289280000  | 1.154182000  |
| C | 3.262520000  | -2.289280000 | -1.154182000 |
| C | 3.404387000  | 0.000000000  | 0.000000000  |
| C | 4.887632000  | 0.000000000  | 0.000000000  |
| C | 5.594356000  | 0.891629000  | -0.817074000 |
| C | 5.594356000  | -0.891629000 | 0.817074000  |
| C | 6.987003000  | 0.885498000  | -0.824346000 |
| C | 6.987003000  | -0.885498000 | 0.824346000  |
| C | 7.686848000  | 0.000000000  | 0.000000000  |
| C | -0.885498000 | 6.987003000  | 0.824346000  |
| C | -0.885498000 | -6.987003000 | -0.824346000 |
| C | -0.891629000 | 5.594356000  | 0.817074000  |
| C | -0.891629000 | -5.594356000 | -0.817074000 |
| C | -1.143840000 | 2.721803000  | -0.446208000 |
| C | -1.143840000 | -2.721803000 | 0.446208000  |
| C | -2.289280000 | 3.262520000  | -1.154182000 |
| C | -2.289280000 | -3.262520000 | 1.154182000  |
| C | -2.721803000 | 1.143840000  | -0.446208000 |
| C | -2.721803000 | -1.143840000 | 0.446208000  |
| C | -3.262520000 | 2.289280000  | -1.154182000 |
| C | -3.262520000 | -2.289280000 | 1.154182000  |
| C | -3.404387000 | 0.000000000  | 0.000000000  |
| C | -4.887632000 | 0.000000000  | 0.000000000  |
| C | -5.594356000 | 0.891629000  | 0.817074000  |
| C | -5.594356000 | -0.891629000 | -0.817074000 |
| C | -6.987003000 | 0.885498000  | 0.824346000  |
| C | -6.987003000 | -0.885498000 | -0.824346000 |
| C | -7.686848000 | 0.000000000  | 0.000000000  |
| H | 0.000000000  | 8.776444000  | 0.000000000  |
| H | 0.000000000  | -8.776444000 | 0.000000000  |
| H | 1.575451000  | 7.528271000  | -1.470060000 |
| H | 1.575451000  | -7.528271000 | 1.470060000  |
| H | 1.582908000  | 5.040059000  | -1.450634000 |
| H | 1.582908000  | -5.040059000 | 1.450634000  |
| H | 5.040059000  | 1.582908000  | -1.450634000 |
| H | 5.040059000  | -1.582908000 | 1.450634000  |
| H | 7.528271000  | 1.575451000  | -1.470060000 |
| H | 7.528271000  | -1.575451000 | 1.470060000  |
| H | 8.776444000  | 0.000000000  | 0.000000000  |
| H | -1.575451000 | 7.528271000  | 1.470060000  |
| H | -1.575451000 | -7.528271000 | -1.470060000 |
| H | -1.582908000 | 5.040059000  | 1.450634000  |



|   |              |              |              |
|---|--------------|--------------|--------------|
| H | -1.582908000 | -5.040059000 | -1.450634000 |
| H | -5.040059000 | 1.582908000  | 1.450634000  |
| H | -5.040059000 | -1.582908000 | -1.450634000 |
| H | -7.528271000 | 1.575451000  | 1.470060000  |
| H | -7.528271000 | -1.575451000 | -1.470060000 |
| H | -8.776444000 | 0.000000000  | 0.000000000  |
| N | 1.405813000  | 1.405813000  | 0.127111000  |
| N | 1.405813000  | -1.405813000 | -0.127111000 |
| N | -1.405813000 | 1.405813000  | -0.127111000 |
| N | -1.405813000 | -1.405813000 | 0.127111000  |

**12. Cu[Br<sub>8</sub>TPP]; S = ½ (ruffled)**

|    |              |              |              |
|----|--------------|--------------|--------------|
| Cu | 0.000000000  | 0.000000000  | 0.000000000  |
| Br | 1.398683000  | 5.759657000  | -0.964169000 |
| Br | 1.398683000  | -5.759657000 | 0.964169000  |
| Br | 5.759657000  | 1.398683000  | -0.964169000 |
| Br | 5.759657000  | -1.398683000 | 0.964169000  |
| Br | -1.398683000 | 5.759657000  | 0.964169000  |
| Br | -1.398683000 | -5.759657000 | -0.964169000 |
| Br | -5.759657000 | 1.398683000  | 0.964169000  |
| Br | -5.759657000 | -1.398683000 | -0.964169000 |
| C  | 0.603556000  | 4.169245000  | -0.329204000 |
| C  | 0.603556000  | -4.169245000 | 0.329204000  |
| C  | 1.032968000  | 2.781743000  | -0.441025000 |
| C  | 1.032968000  | -2.781743000 | 0.441025000  |
| C  | 2.331106000  | 2.331106000  | -0.739645000 |
| C  | 2.331106000  | -2.331106000 | 0.739645000  |
| C  | 2.781743000  | 1.032968000  | -0.441025000 |
| C  | 2.781743000  | -1.032968000 | 0.441025000  |
| C  | 3.325727000  | 3.325727000  | -1.236384000 |
| C  | 3.325727000  | -3.325727000 | 1.236384000  |
| C  | 3.508525000  | 3.508525000  | -2.608970000 |
| C  | 3.508525000  | -3.508525000 | 2.608970000  |
| C  | 4.081133000  | 4.081133000  | -0.331546000 |
| C  | 4.081133000  | -4.081133000 | 0.331546000  |
| C  | 4.169245000  | 0.603556000  | -0.329204000 |
| C  | 4.169245000  | -0.603556000 | 0.329204000  |
| C  | 4.438415000  | 4.438415000  | -3.074058000 |
| C  | 4.438415000  | -4.438415000 | 3.074058000  |
| C  | 5.009317000  | 5.009317000  | -0.793947000 |
| C  | 5.009317000  | -5.009317000 | 0.793947000  |
| C  | 5.190038000  | 5.190038000  | -2.167704000 |
| C  | 5.190038000  | -5.190038000 | 2.167704000  |
| C  | -0.603556000 | 4.169245000  | 0.329204000  |
| C  | -0.603556000 | -4.169245000 | -0.329204000 |
| C  | -1.032968000 | 2.781743000  | 0.441025000  |
| C  | -1.032968000 | -2.781743000 | -0.441025000 |
| C  | -2.331106000 | 2.331106000  | 0.739645000  |
| C  | -2.331106000 | -2.331106000 | -0.739645000 |

|   |              |              |              |
|---|--------------|--------------|--------------|
| C | -2.781743000 | 1.032968000  | 0.441025000  |
| C | -2.781743000 | -1.032968000 | -0.441025000 |
| C | -3.325727000 | 3.325727000  | 1.236384000  |
| C | -3.325727000 | -3.325727000 | -1.236384000 |
| C | -3.508525000 | 3.508525000  | 2.608970000  |
| C | -3.508525000 | -3.508525000 | -2.608970000 |
| C | -4.081133000 | 4.081133000  | 0.331546000  |
| C | -4.081133000 | -4.081133000 | -0.331546000 |
| C | -4.169245000 | 0.603556000  | 0.329204000  |
| C | -4.169245000 | -0.603556000 | -0.329204000 |
| C | -4.438415000 | 4.438415000  | 3.074058000  |
| C | -4.438415000 | -4.438415000 | -3.074058000 |
| C | -5.009317000 | 5.009317000  | 0.793947000  |
| C | -5.009317000 | -5.009317000 | -0.793947000 |
| C | -5.190038000 | 5.190038000  | 2.167704000  |
| C | -5.190038000 | -5.190038000 | -2.167704000 |
| H | 2.918637000  | 2.918637000  | -3.309282000 |
| H | 2.918637000  | -2.918637000 | 3.309282000  |
| H | 3.932028000  | 3.932028000  | 0.737000000  |
| H | 3.932028000  | -3.932028000 | -0.737000000 |
| H | 4.576349000  | 4.576349000  | -4.145488000 |
| H | 4.576349000  | -4.576349000 | 4.145488000  |
| H | 5.592538000  | 5.592538000  | -0.083021000 |
| H | 5.592538000  | -5.592538000 | 0.083021000  |
| H | 5.916168000  | 5.916168000  | -2.532075000 |
| H | 5.916168000  | -5.916168000 | 2.532075000  |
| H | -2.918637000 | 2.918637000  | 3.309282000  |
| H | -2.918637000 | -2.918637000 | -3.309282000 |
| H | -3.932028000 | 3.932028000  | -0.737000000 |
| H | -3.932028000 | -3.932028000 | 0.737000000  |
| H | -4.576349000 | 4.576349000  | 4.145488000  |
| H | -4.576349000 | -4.576349000 | -4.145488000 |
| H | -5.592538000 | 5.592538000  | 0.083021000  |
| H | -5.592538000 | -5.592538000 | -0.083021000 |
| H | -5.916168000 | 5.916168000  | 2.532075000  |
| H | -5.916168000 | -5.916168000 | -2.532075000 |
| N | 0.000000000  | 1.979136000  | 0.000000000  |
| N | 0.000000000  | -1.979136000 | 0.000000000  |
| N | 1.979136000  | 0.000000000  | 0.000000000  |
| N | -1.979136000 | 0.000000000  | 0.000000000  |

**13. Ni[Br<sub>3</sub>TPP]; S = 0 (saddled)**

|    |              |              |              |
|----|--------------|--------------|--------------|
| Ni | 0.000000000  | 0.000000000  | 0.000000000  |
| Br | 2.320972000  | 4.815410000  | 2.210905000  |
| Br | 2.320972000  | -4.815410000 | -2.210905000 |
| Br | 4.815410000  | 2.320972000  | 2.210905000  |
| Br | 4.815410000  | -2.320972000 | -2.210905000 |
| Br | -2.320972000 | 4.815410000  | -2.210905000 |
| Br | -2.320972000 | -4.815410000 | 2.210905000  |

|    |              |              |              |
|----|--------------|--------------|--------------|
| Br | -4.815410000 | 2.320972000  | -2.210905000 |
| Br | -4.815410000 | -2.320972000 | 2.210905000  |
| C  | 0.000000000  | 3.365618000  | 0.000000000  |
| C  | 0.000000000  | 4.849269000  | 0.000000000  |
| C  | 0.000000000  | 7.648167000  | 0.000000000  |
| C  | 0.000000000  | -3.365618000 | 0.000000000  |
| C  | 0.000000000  | -4.849269000 | 0.000000000  |
| C  | 0.000000000  | -7.648167000 | 0.000000000  |
| C  | 0.922279000  | 6.948255000  | -0.782786000 |
| C  | 0.922279000  | -6.948255000 | 0.782786000  |
| C  | 0.927383000  | 5.55285000   | -0.776014000 |
| C  | 0.927383000  | -5.55285000  | 0.776014000  |
| C  | 1.091666000  | 2.666228000  | 0.520625000  |
| C  | 1.091666000  | -2.666228000 | -0.520625000 |
| C  | 2.220710000  | 3.191941000  | 1.260623000  |
| C  | 2.220710000  | -3.191941000 | -1.260623000 |
| C  | 2.666228000  | 1.091666000  | 0.520625000  |
| C  | 2.666228000  | -1.091666000 | -0.520625000 |
| C  | 3.191941000  | 2.220710000  | 1.260623000  |
| C  | 3.191941000  | -2.220710000 | -1.260623000 |
| C  | 3.365618000  | 0.000000000  | 0.000000000  |
| C  | 4.849269000  | 0.000000000  | 0.000000000  |
| C  | 5.55285000   | 0.927383000  | -0.776014000 |
| C  | 5.55285000   | -0.927383000 | 0.776014000  |
| C  | 6.948255000  | 0.922279000  | -0.782786000 |
| C  | 6.948255000  | -0.922279000 | 0.782786000  |
| C  | 7.648167000  | 0.000000000  | 0.000000000  |
| C  | -0.922279000 | 6.948255000  | 0.782786000  |
| C  | -0.922279000 | -6.948255000 | -0.782786000 |
| C  | -0.927383000 | 5.55285000   | 0.776014000  |
| C  | -0.927383000 | -5.55285000  | -0.776014000 |
| C  | -1.091666000 | 2.666228000  | -0.520625000 |
| C  | -1.091666000 | -2.666228000 | 0.520625000  |
| C  | -2.220710000 | 3.191941000  | -1.260623000 |
| C  | -2.220710000 | -3.191941000 | 1.260623000  |
| C  | -2.666228000 | 1.091666000  | -0.520625000 |
| C  | -2.666228000 | -1.091666000 | 0.520625000  |
| C  | -3.191941000 | 2.220710000  | -1.260623000 |
| C  | -3.191941000 | -2.220710000 | 1.260623000  |
| C  | -3.365618000 | 0.000000000  | 0.000000000  |
| C  | -4.849269000 | 0.000000000  | 0.000000000  |
| C  | -5.55285000  | 0.927383000  | 0.776014000  |
| C  | -5.55285000  | -0.927383000 | -0.776014000 |
| C  | -6.948255000 | 0.922279000  | 0.782786000  |
| C  | -6.948255000 | -0.922279000 | -0.782786000 |
| C  | -7.648167000 | 0.000000000  | 0.000000000  |
| H  | 0.000000000  | 8.737764000  | 0.000000000  |
| H  | 0.000000000  | -8.737764000 | 0.000000000  |
| H  | 1.641615000  | 7.489454000  | -1.395757000 |
| H  | 1.641615000  | -7.489454000 | 1.395757000  |
| H  | 1.646856000  | 5.000888000  | -1.377355000 |

|   |              |              |              |
|---|--------------|--------------|--------------|
| H | 1.646856000  | -5.000888000 | 1.377355000  |
| H | 5.000888000  | 1.646856000  | -1.377355000 |
| H | 5.000888000  | -1.646856000 | 1.377355000  |
| H | 7.489454000  | 1.641615000  | -1.395757000 |
| H | 7.489454000  | -1.641615000 | 1.395757000  |
| H | 8.737764000  | 0.000000000  | 0.000000000  |
| H | -1.641615000 | 7.489454000  | 1.395757000  |
| H | -1.641615000 | -7.489454000 | -1.395757000 |
| H | -1.646856000 | 5.000888000  | 1.377355000  |
| H | -1.646856000 | -5.000888000 | -1.377355000 |
| H | -5.000888000 | 1.646856000  | 1.377355000  |
| H | -5.000888000 | -1.646856000 | -1.377355000 |
| H | -7.489454000 | 1.641615000  | 1.395757000  |
| H | -7.489454000 | -1.641615000 | -1.395757000 |
| H | -8.737764000 | 0.000000000  | 0.000000000  |
| N | 1.339515000  | 1.339515000  | 0.208541000  |
| N | 1.339515000  | -1.339515000 | -0.208541000 |
| N | -1.339515000 | 1.339515000  | -0.208541000 |
| N | -1.339515000 | -1.339515000 | 0.208541000  |

#### 14. Ni[Br<sub>8</sub>TPP]; S = 0 (ruffled)

|    |              |              |              |
|----|--------------|--------------|--------------|
| Ni | 0.000000000  | 0.000000000  | 0.000000000  |
| Br | 1.277132000  | 5.656320000  | -1.148397000 |
| Br | 1.277132000  | -5.656320000 | 1.148397000  |
| Br | 5.656320000  | 1.277132000  | -1.148397000 |
| Br | 5.656320000  | -1.277132000 | 1.148397000  |
| Br | -1.277132000 | 5.656320000  | 1.148397000  |
| Br | -1.277132000 | -5.656320000 | -1.148397000 |
| Br | -5.656320000 | 1.277132000  | 1.148397000  |
| Br | -5.656320000 | -1.277132000 | -1.148397000 |
| C  | 0.556900000  | 4.081426000  | -0.401969000 |
| C  | 0.556900000  | -4.081426000 | 0.401969000  |
| C  | 0.976162000  | 2.697062000  | -0.553047000 |
| C  | 0.976162000  | -2.697062000 | 0.553047000  |
| C  | 2.249135000  | 2.249135000  | -0.932388000 |
| C  | 2.249135000  | -2.249135000 | 0.932388000  |
| C  | 2.697062000  | 0.976162000  | -0.553047000 |
| C  | 2.697062000  | -0.976162000 | 0.553047000  |
| C  | 3.206258000  | 3.206258000  | -1.556079000 |
| C  | 3.206258000  | -3.206258000 | 1.556079000  |
| C  | 3.297140000  | 3.297140000  | -2.946758000 |
| C  | 3.297140000  | -3.297140000 | 2.946758000  |
| C  | 4.019167000  | 4.019167000  | -0.756526000 |
| C  | 4.019167000  | -4.019167000 | 0.756526000  |
| C  | 4.081426000  | 0.556900000  | -0.401969000 |
| C  | 4.081426000  | -0.556900000 | 0.401969000  |
| C  | 4.192402000  | 4.192402000  | -3.533943000 |
| C  | 4.192402000  | -4.192402000 | 3.533943000  |
| C  | 4.912337000  | 4.912337000  | -1.340169000 |

|   |              |              |              |
|---|--------------|--------------|--------------|
| C | 4.912337000  | -4.912337000 | 1.340169000  |
| C | 5.001054000  | 5.001054000  | -2.732039000 |
| C | 5.001054000  | -5.001054000 | 2.732039000  |
| C | -0.556900000 | 4.081426000  | 0.401969000  |
| C | -0.556900000 | -4.081426000 | -0.401969000 |
| C | -0.976162000 | 2.697062000  | 0.553047000  |
| C | -0.976162000 | -2.697062000 | -0.553047000 |
| C | -2.249135000 | 2.249135000  | 0.932388000  |
| C | -2.249135000 | -2.249135000 | -0.932388000 |
| C | -2.697062000 | 0.976162000  | 0.553047000  |
| C | -2.697062000 | -0.976162000 | -0.553047000 |
| C | -3.206258000 | 3.206258000  | 1.556079000  |
| C | -3.206258000 | -3.206258000 | -1.556079000 |
| C | -3.297140000 | 3.297140000  | 2.946758000  |
| C | -3.297140000 | -3.297140000 | -2.946758000 |
| C | -4.019167000 | 4.019167000  | 0.756526000  |
| C | -4.019167000 | -4.019167000 | -0.756526000 |
| C | -4.081426000 | 0.556900000  | 0.401969000  |
| C | -4.081426000 | -0.556900000 | -0.401969000 |
| C | -4.192402000 | 4.192402000  | 3.533943000  |
| C | -4.192402000 | -4.192402000 | -3.533943000 |
| C | -4.912337000 | 4.912337000  | 1.340169000  |
| C | -4.912337000 | -4.912337000 | -1.340169000 |
| C | -5.001054000 | 5.001054000  | 2.732039000  |
| C | -5.001054000 | -5.001054000 | -2.732039000 |
| H | 2.663425000  | 2.663425000  | -3.565864000 |
| H | 2.663425000  | -2.663425000 | 3.565864000  |
| H | 3.942055000  | 3.942055000  | 0.327158000  |
| H | 3.942055000  | -3.942055000 | -0.327158000 |
| H | 4.258088000  | 4.258088000  | -4.619076000 |
| H | 4.258088000  | -4.258088000 | 4.619076000  |
| H | 5.540079000  | 5.540079000  | -0.709584000 |
| H | 5.540079000  | -5.540079000 | 0.709584000  |
| H | 5.699696000  | 5.699696000  | -3.191528000 |
| H | 5.699696000  | -5.699696000 | 3.191528000  |
| H | -2.663425000 | 2.663425000  | 3.565864000  |
| H | -2.663425000 | -2.663425000 | -3.565864000 |
| H | -3.942055000 | 3.942055000  | -0.327158000 |
| H | -3.942055000 | -3.942055000 | 0.327158000  |
| H | -4.258088000 | 4.258088000  | 4.619076000  |
| H | -4.258088000 | -4.258088000 | -4.619076000 |
| H | -5.540079000 | 5.540079000  | 0.709584000  |
| H | -5.540079000 | -5.540079000 | -0.709584000 |
| H | -5.699696000 | 5.699696000  | 3.191528000  |
| H | -5.699696000 | -5.699696000 | -3.191528000 |
| N | 0.000000000  | 1.888373000  | 0.000000000  |
| N | 0.000000000  | -1.888373000 | 0.000000000  |
| N | 1.888373000  | 0.000000000  | 0.000000000  |
| N | -1.888373000 | 0.000000000  | 0.000000000  |

15. Pd[Br<sub>8</sub>TPP]; S = 0 (saddled)

|    |              |              |              |
|----|--------------|--------------|--------------|
| Pd | 0.000000000  | 0.000000000  | 0.000000000  |
| Br | 2.467241000  | 4.936350000  | 2.012843000  |
| Br | 2.467241000  | -4.936350000 | -2.012843000 |
| Br | 4.936350000  | 2.467241000  | 2.012843000  |
| Br | 4.936350000  | -2.467241000 | -2.012843000 |
| Br | -2.467241000 | 4.936350000  | -2.012843000 |
| Br | -2.467241000 | -4.936350000 | 2.012843000  |
| Br | -4.936350000 | 2.467241000  | -2.012843000 |
| Br | -4.936350000 | -2.467241000 | 2.012843000  |
| C  | 0.000000000  | 3.416723000  | 0.000000000  |
| C  | 0.000000000  | 4.901518000  | 0.000000000  |
| C  | 0.000000000  | 7.699561000  | 0.000000000  |
| C  | 0.000000000  | -3.416723000 | 0.000000000  |
| C  | 0.000000000  | -4.901518000 | 0.000000000  |
| C  | 0.000000000  | -7.699561000 | 0.000000000  |
| C  | 0.851997000  | 6.999868000  | -0.858946000 |
| C  | 0.851997000  | -6.999868000 | 0.858946000  |
| C  | 0.858247000  | 5.607184000  | -0.851992000 |
| C  | 0.858247000  | -5.607184000 | 0.851992000  |
| C  | 1.156803000  | 2.744662000  | 0.424282000  |
| C  | 1.156803000  | -2.744662000 | -0.424282000 |
| C  | 2.319954000  | 3.292370000  | 1.101706000  |
| C  | 2.319954000  | -3.292370000 | -1.101706000 |
| C  | 2.744662000  | 1.156803000  | 0.424282000  |
| C  | 2.744662000  | -1.156803000 | -0.424282000 |
| C  | 3.292370000  | 2.319954000  | 1.101706000  |
| C  | 3.292370000  | -2.319954000 | -1.101706000 |
| C  | 3.416723000  | 0.000000000  | 0.000000000  |
| C  | 4.901518000  | 0.000000000  | 0.000000000  |
| C  | 5.607184000  | 0.858247000  | -0.851992000 |
| C  | 5.607184000  | -0.858247000 | 0.851992000  |
| C  | 6.999868000  | 0.851997000  | -0.858946000 |
| C  | 6.999868000  | -0.851997000 | 0.858946000  |
| C  | 7.699561000  | 0.000000000  | 0.000000000  |
| C  | -0.851997000 | 6.999868000  | 0.858946000  |
| C  | -0.851997000 | -6.999868000 | -0.858946000 |
| C  | -0.858247000 | 5.607184000  | 0.851992000  |
| C  | -0.858247000 | -5.607184000 | -0.851992000 |
| C  | -1.156803000 | 2.744662000  | -0.424282000 |
| C  | -1.156803000 | -2.744662000 | 0.424282000  |
| C  | -2.319954000 | 3.292370000  | -1.101706000 |
| C  | -2.319954000 | -3.292370000 | 1.101706000  |
| C  | -2.744662000 | 1.156803000  | -0.424282000 |
| C  | -2.744662000 | -1.156803000 | 0.424282000  |
| C  | -3.292370000 | 2.319954000  | -1.101706000 |
| C  | -3.292370000 | -2.319954000 | 1.101706000  |
| C  | -3.416723000 | 0.000000000  | 0.000000000  |
| C  | -4.901518000 | 0.000000000  | 0.000000000  |
| C  | -5.607184000 | 0.858247000  | 0.851992000  |

|   |              |              |              |
|---|--------------|--------------|--------------|
| C | -5.607184000 | -0.858247000 | -0.851992000 |
| C | -6.999868000 | 0.851997000  | 0.858946000  |
| C | -6.999868000 | -0.851997000 | -0.858946000 |
| C | -7.699561000 | 0.000000000  | 0.000000000  |
| H | 0.000000000  | 8.789161000  | 0.000000000  |
| H | 0.000000000  | -8.789161000 | 0.000000000  |
| H | 1.515891000  | 7.541118000  | -1.531394000 |
| H | 1.515891000  | -7.541118000 | 1.531394000  |
| H | 1.523785000  | 5.052455000  | -1.512158000 |
| H | 1.523785000  | -5.052455000 | 1.512158000  |
| H | 5.052455000  | 1.523785000  | -1.512158000 |
| H | 5.052455000  | -1.523785000 | 1.512158000  |
| H | 7.541118000  | 1.515891000  | -1.531394000 |
| H | 7.541118000  | -1.515891000 | 1.531394000  |
| H | 8.789161000  | 0.000000000  | 0.000000000  |
| H | -1.515891000 | 7.541118000  | 1.531394000  |
| H | -1.515891000 | -7.541118000 | -1.531394000 |
| H | -1.523785000 | 5.052455000  | 1.512158000  |
| H | -1.523785000 | -5.052455000 | -1.512158000 |
| H | -5.052455000 | 1.523785000  | 1.512158000  |
| H | -5.052455000 | -1.523785000 | -1.512158000 |
| H | -7.541118000 | 1.515891000  | 1.531394000  |
| H | -7.541118000 | -1.515891000 | -1.531394000 |
| H | -8.789161000 | 0.000000000  | 0.000000000  |
| N | 1.422609000  | 1.422609000  | 0.123027000  |
| N | 1.422609000  | -1.422609000 | -0.123027000 |
| N | -1.422609000 | 1.422609000  | -0.123027000 |
| N | -1.422609000 | -1.422609000 | 0.123027000  |

**16. Pd[Br<sub>8</sub>TPP]; S = 0 (ruffled)**

|    |              |              |              |
|----|--------------|--------------|--------------|
| Pd | 0.000000000  | 0.000000000  | 0.000000000  |
| Br | 1.463985000  | 5.803931000  | -0.841311000 |
| Br | 1.463985000  | -5.803931000 | 0.841311000  |
| Br | 5.803931000  | 1.463985000  | -0.841311000 |
| Br | 5.803931000  | -1.463985000 | 0.841311000  |
| Br | -1.463985000 | 5.803931000  | 0.841311000  |
| Br | -1.463985000 | -5.803931000 | -0.841311000 |
| Br | -5.803931000 | 1.463985000  | 0.841311000  |
| Br | -5.803931000 | -1.463985000 | -0.841311000 |
| C  | 0.624808000  | 4.207229000  | -0.284351000 |
| C  | 0.624808000  | -4.207229000 | 0.284351000  |
| C  | 1.062457000  | 2.818718000  | -0.378332000 |
| C  | 1.062457000  | -2.818718000 | 0.378332000  |
| C  | 2.369490000  | 2.369490000  | -0.629424000 |
| C  | 2.369490000  | -2.369490000 | 0.629424000  |
| C  | 2.818718000  | 1.062457000  | -0.378332000 |
| C  | 2.818718000  | -1.062457000 | 0.378332000  |
| C  | 3.381700000  | 3.381700000  | -1.051473000 |
| C  | 3.381700000  | -3.381700000 | 1.051473000  |

|    |              |              |              |
|----|--------------|--------------|--------------|
| C  | 3.615299000  | 3.615299000  | -2.408555000 |
| C  | 3.615299000  | -3.615299000 | 2.408555000  |
| C  | 4.101199000  | 4.101199000  | -0.090556000 |
| C  | 4.101199000  | -4.101199000 | 0.090556000  |
| C  | 4.207229000  | 0.624808000  | -0.284351000 |
| C  | 4.207229000  | -0.624808000 | 0.284351000  |
| C  | 4.561126000  | 4.561126000  | -2.802809000 |
| C  | 4.561126000  | -4.561126000 | 2.802809000  |
| C  | 5.045505000  | 5.045505000  | -0.482541000 |
| C  | 5.045505000  | -5.045505000 | 0.482541000  |
| C  | 5.277468000  | 5.277468000  | -1.840824000 |
| C  | 5.277468000  | -5.277468000 | 1.840824000  |
| C  | -0.624808000 | 4.207229000  | 0.284351000  |
| C  | -0.624808000 | -4.207229000 | -0.284351000 |
| C  | -1.062457000 | 2.818718000  | 0.378332000  |
| C  | -1.062457000 | -2.818718000 | -0.378332000 |
| C  | -2.369490000 | 2.369490000  | 0.629424000  |
| C  | -2.369490000 | -2.369490000 | -0.629424000 |
| C  | -2.818718000 | 1.062457000  | 0.378332000  |
| C  | -2.818718000 | -1.062457000 | -0.378332000 |
| C  | -3.381700000 | 3.381700000  | 1.051473000  |
| C  | -3.381700000 | -3.381700000 | -1.051473000 |
| C  | -3.615299000 | 3.615299000  | 2.408555000  |
| C  | -3.615299000 | -3.615299000 | -2.408555000 |
| C  | -4.101199000 | 4.101199000  | 0.090556000  |
| C  | -4.101199000 | -4.101199000 | -0.090556000 |
| C  | -4.207229000 | 0.624808000  | 0.284351000  |
| C  | -4.207229000 | -0.624808000 | -0.284351000 |
| C  | -4.561126000 | 4.561126000  | 2.802809000  |
| C  | -4.561126000 | -4.561126000 | -2.802809000 |
| \C | -5.045505000 | 5.045505000  | 0.482541000  |
| C  | -5.045505000 | -5.045505000 | -0.482541000 |
| C  | -5.277468000 | 5.277468000  | 1.840824000  |
| C  | -5.277468000 | -5.277468000 | -1.840824000 |
| H  | 3.052246000  | 3.052246000  | -3.151650000 |
| H  | 3.052246000  | -3.052246000 | 3.151650000  |
| H  | 3.911837000  | 3.911837000  | 0.965141000  |
| H  | 3.911837000  | -3.911837000 | -0.965141000 |
| H  | 4.739353000  | 4.739353000  | -3.862242000 |
| H  | 4.739353000  | -4.739353000 | 3.862242000  |
| H  | 5.601240000  | 5.601240000  | 0.271083000  |
| H  | 5.601240000  | -5.601240000 | -0.271083000 |
| H  | 6.016290000  | 6.016290000  | -2.149964000 |
| H  | 6.016290000  | -6.016290000 | 2.149964000  |
| H  | -3.052246000 | 3.052246000  | 3.151650000  |
| H  | -3.052246000 | -3.052246000 | -3.151650000 |
| H  | -3.911837000 | 3.911837000  | -0.965141000 |
| H  | -3.911837000 | -3.911837000 | 0.965141000  |
| H  | -4.739353000 | 4.739353000  | 3.862242000  |
| H  | -4.739353000 | -4.739353000 | -3.862242000 |
| H  | -5.601240000 | 5.601240000  | -0.271083000 |



|   |              |              |              |
|---|--------------|--------------|--------------|
| H | -5.601240000 | -5.601240000 | 0.271083000  |
| H | -6.016290000 | 6.016290000  | 2.149964000  |
| H | -6.016290000 | -6.016290000 | -2.149964000 |
| N | 0.000000000  | 2.018677000  | 0.000000000  |
| N | 0.000000000  | -2.018677000 | 0.000000000  |
| N | 2.018677000  | 0.000000000  | 0.000000000  |
| N | -2.018677000 | 0.000000000  | 0.000000000  |

**17. Pt[Br<sub>8</sub>TPP]; S = 0 (saddled)**

|    |              |              |              |
|----|--------------|--------------|--------------|
| Pt | 0.000000000  | 0.000000000  | 0.000000000  |
| Br | 2.505941000  | 4.967165000  | 1.944216000  |
| Br | 2.505941000  | -4.967165000 | -1.944216000 |
| Br | 4.967165000  | 2.505941000  | 1.944216000  |
| Br | 4.967165000  | -2.505941000 | -1.944216000 |
| Br | -2.505941000 | 4.967165000  | -1.944216000 |
| Br | -2.505941000 | -4.967165000 | 1.944216000  |
| Br | -4.967165000 | 2.505941000  | -1.944216000 |
| Br | -4.967165000 | -2.505941000 | 1.944216000  |
| C  | 0.000000000  | 3.419163000  | 0.000000000  |
| C  | 0.000000000  | 4.905627000  | 0.000000000  |
| C  | 0.000000000  | 7.703212000  | 0.000000000  |
| C  | 0.000000000  | -3.419163000 | 0.000000000  |
| C  | 0.000000000  | -4.905627000 | 0.000000000  |
| C  | 0.000000000  | -7.703212000 | 0.000000000  |
| C  | 0.820473000  | 7.003564000  | -0.889058000 |
| C  | 0.820473000  | -7.003564000 | 0.889058000  |
| C  | 0.826556000  | 5.610778000  | -0.882674000 |
| C  | 0.826556000  | -5.610778000 | 0.882674000  |
| C  | 1.160409000  | 2.751602000  | 0.420037000  |
| C  | 1.160409000  | -2.751602000 | -0.420037000 |
| C  | 2.336543000  | 3.308206000  | 1.064923000  |
| C  | 2.336543000  | -3.308206000 | -1.064923000 |
| C  | 2.751602000  | 1.160409000  | 0.420037000  |
| C  | 2.751602000  | -1.160409000 | -0.420037000 |
| C  | 3.308206000  | 2.336543000  | 1.064923000  |
| C  | 3.308206000  | -2.336543000 | -1.064923000 |
| C  | 3.419163000  | 0.000000000  | 0.000000000  |
| C  | 4.905627000  | 0.000000000  | 0.000000000  |
| C  | 5.610778000  | 0.826556000  | -0.882674000 |
| C  | 5.610778000  | -0.826556000 | 0.882674000  |
| C  | 7.003564000  | 0.820473000  | -0.889058000 |
| C  | 7.003564000  | -0.820473000 | 0.889058000  |
| C  | 7.703212000  | 0.000000000  | 0.000000000  |
| C  | -0.820473000 | 7.003564000  | 0.889058000  |
| C  | -0.820473000 | -7.003564000 | -0.889058000 |
| C  | -0.826556000 | 5.610778000  | 0.882674000  |
| C  | -0.826556000 | -5.610778000 | -0.882674000 |
| C  | -1.160409000 | 2.751602000  | -0.420037000 |
| C  | -1.160409000 | -2.751602000 | 0.420037000  |

|   |              |              |              |
|---|--------------|--------------|--------------|
| C | -2.336543000 | 3.308206000  | -1.064923000 |
| C | -2.336543000 | -3.308206000 | 1.064923000  |
| C | -2.751602000 | 1.160409000  | -0.420037000 |
| C | -2.751602000 | -1.160409000 | 0.420037000  |
| C | -3.308206000 | 2.336543000  | -1.064923000 |
| C | -3.308206000 | -2.336543000 | 1.064923000  |
| C | -3.419163000 | 0.000000000  | 0.000000000  |
| C | -4.905627000 | 0.000000000  | 0.000000000  |
| C | -5.610778000 | 0.826556000  | 0.882674000  |
| C | -5.610778000 | -0.826556000 | -0.882674000 |
| C | -7.003564000 | 0.820473000  | 0.889058000  |
| C | -7.003564000 | -0.820473000 | -0.889058000 |
| C | -7.703212000 | 0.000000000  | 0.000000000  |
| H | 0.000000000  | 8.792780000  | 0.000000000  |
| H | 0.000000000  | -8.792780000 | 0.000000000  |
| H | 1.460030000  | 7.544830000  | -1.584655000 |
| H | 1.460030000  | -7.544830000 | 1.584655000  |
| H | 1.467470000  | 5.055977000  | -1.566709000 |
| H | 1.467470000  | -5.055977000 | 1.566709000  |
| H | 5.055977000  | 1.467470000  | -1.566709000 |
| H | 5.055977000  | -1.467470000 | 1.566709000  |
| H | 7.544830000  | 1.460030000  | -1.584655000 |
| H | 7.544830000  | -1.460030000 | 1.584655000  |
| H | 8.792780000  | 0.000000000  | 0.000000000  |
| H | -1.460030000 | 7.544830000  | 1.584655000  |
| H | -1.460030000 | -7.544830000 | -1.584655000 |
| H | -1.467470000 | 5.055977000  | 1.566709000  |
| H | -1.467470000 | -5.055977000 | -1.566709000 |
| H | -5.055977000 | 1.467470000  | 1.566709000  |
| H | -5.055977000 | -1.467470000 | -1.566709000 |
| H | -7.544830000 | 1.460030000  | 1.584655000  |
| H | -7.544830000 | -1.460030000 | -1.584655000 |
| H | -8.792780000 | 0.000000000  | 0.000000000  |
| N | 1.418074000  | 1.418074000  | 0.149964000  |
| N | 1.418074000  | -1.418074000 | -0.149964000 |
| N | -1.418074000 | 1.418074000  | -0.149964000 |
| N | -1.418074000 | -1.418074000 | 0.149964000  |

**18. Pt[Br<sub>8</sub>TPP]; S = 0 (ruffled)**

|    |              |              |              |
|----|--------------|--------------|--------------|
| Pt | 0.000000000  | 0.000000000  | 0.000000000  |
| Br | 1.472291000  | 5.807558000  | -0.821927000 |
| Br | 1.472291000  | -5.807558000 | 0.821927000  |
| Br | 5.807558000  | 1.472291000  | -0.821927000 |
| Br | 5.807558000  | -1.472291000 | 0.821927000  |
| Br | -1.472291000 | 5.807558000  | 0.821927000  |
| Br | -1.472291000 | -5.807558000 | -0.821927000 |
| Br | -5.807558000 | 1.472291000  | 0.821927000  |
| Br | -5.807558000 | -1.472291000 | -0.821927000 |
| C  | 0.627630000  | 4.209747000  | -0.277069000 |

|   |              |              |              |
|---|--------------|--------------|--------------|
| C | 0.627630000  | -4.209747000 | 0.277069000  |
| C | 1.067161000  | 2.823874000  | -0.369116000 |
| C | 1.067161000  | -2.823874000 | 0.369116000  |
| C | 2.375027000  | 2.375027000  | -0.613794000 |
| C | 2.375027000  | -2.375027000 | 0.613794000  |
| C | 2.823874000  | 1.067161000  | -0.369116000 |
| C | 2.823874000  | -1.067161000 | 0.369116000  |
| C | 3.389708000  | 3.389708000  | -1.025205000 |
| C | 3.389708000  | -3.389708000 | 1.025205000  |
| C | 3.630208000  | 3.630208000  | -2.379980000 |
| C | 3.630208000  | -3.630208000 | 2.379980000  |
| C | 4.104082000  | 4.104082000  | -0.056640000 |
| C | 4.104082000  | -4.104082000 | 0.056640000  |
| C | 4.209747000  | 0.627630000  | -0.277069000 |
| C | 4.209747000  | -0.627630000 | 0.277069000  |
| C | 4.578062000  | 4.578062000  | -2.764338000 |
| C | 4.578062000  | -4.578062000 | 2.764338000  |
| C | 5.050395000  | 5.050395000  | -0.438921000 |
| C | 5.050395000  | -5.050395000 | 0.438921000  |
| C | 5.289349000  | 5.289349000  | -1.794811000 |
| C | 5.289349000  | -5.289349000 | 1.794811000  |
| C | -0.627630000 | 4.209747000  | 0.277069000  |
| C | -0.627630000 | -4.209747000 | -0.277069000 |
| C | -1.067161000 | 2.823874000  | 0.369116000  |
| C | -1.067161000 | -2.823874000 | -0.369116000 |
| C | -2.375027000 | 2.375027000  | 0.613794000  |
| C | -2.375027000 | -2.375027000 | -0.613794000 |
| C | -2.823874000 | 1.067161000  | 0.369116000  |
| C | -2.823874000 | -1.067161000 | -0.369116000 |
| C | -3.389708000 | 3.389708000  | 1.025205000  |
| C | -3.389708000 | -3.389708000 | -1.025205000 |
| C | -3.630208000 | 3.630208000  | 2.379980000  |
| C | -3.630208000 | -3.630208000 | -2.379980000 |
| C | -4.104082000 | 4.104082000  | 0.056640000  |
| C | -4.104082000 | -4.104082000 | -0.056640000 |
| C | -4.209747000 | 0.627630000  | 0.277069000  |
| C | -4.209747000 | -0.627630000 | -0.277069000 |
| C | -4.578062000 | 4.578062000  | 2.764338000  |
| C | -4.578062000 | -4.578062000 | -2.764338000 |
| C | -5.050395000 | 5.050395000  | 0.438921000  |
| C | -5.050395000 | -5.050395000 | -0.438921000 |
| C | -5.289349000 | 5.289349000  | 1.794811000  |
| C | -5.289349000 | -5.289349000 | -1.794811000 |
| H | 3.070861000  | 3.070861000  | -3.128673000 |
| H | 3.070861000  | -3.070861000 | 3.128673000  |
| H | 3.909119000  | 3.909119000  | 0.997036000  |
| H | 3.909119000  | -3.909119000 | -0.997036000 |
| H | 4.761897000  | 4.761897000  | -3.821864000 |
| H | 4.761897000  | -4.761897000 | 3.821864000  |
| H | 5.602304000  | 5.602304000  | 0.320310000  |
| H | 5.602304000  | -5.602304000 | -0.320310000 |

|   |              |              |              |
|---|--------------|--------------|--------------|
| H | 6.029783000  | 6.029783000  | -2.096222000 |
| H | 6.029783000  | -6.029783000 | 2.096222000  |
| H | -3.070861000 | 3.070861000  | 3.128673000  |
| H | -3.070861000 | -3.070861000 | -3.128673000 |
| H | -3.909119000 | 3.909119000  | -0.997036000 |
| H | -3.909119000 | -3.909119000 | 0.997036000  |
| H | -4.761897000 | 4.761897000  | 3.821864000  |
| H | -4.761897000 | -4.761897000 | -3.821864000 |
| H | -5.602304000 | 5.602304000  | -0.320310000 |
| H | -5.602304000 | -5.602304000 | 0.320310000  |
| H | -6.029783000 | 6.029783000  | 2.096222000  |
| H | -6.029783000 | -6.029783000 | -2.096222000 |
| N | 0.000000000  | 2.020007000  | 0.000000000  |
| N | 0.000000000  | -2.020007000 | 0.000000000  |
| N | 2.020007000  | 0.000000000  | 0.000000000  |
| N | -2.020007000 | 0.000000000  | 0.000000000  |

**19. Zn[Br<sub>8</sub>TPP]; S = 0 (saddled)**

|    |              |              |              |
|----|--------------|--------------|--------------|
| Zn | 0.000000000  | 0.000000000  | 0.000000000  |
| Br | 2.522443000  | 4.980079000  | 1.935999000  |
| Br | 2.522443000  | -4.980079000 | -1.935999000 |
| Br | 4.980079000  | 2.522443000  | 1.935999000  |
| Br | 4.980079000  | -2.522443000 | -1.935999000 |
| Br | -2.522443000 | 4.980079000  | -1.935999000 |
| Br | -2.522443000 | -4.980079000 | 1.935999000  |
| Br | -4.980079000 | 2.522443000  | -1.935999000 |
| Br | -4.980079000 | -2.522443000 | 1.935999000  |
| C  | 0.000000000  | 3.424408000  | 0.000000000  |
| C  | 0.000000000  | 4.909992000  | 0.000000000  |
| C  | 0.000000000  | 7.708984000  | 0.000000000  |
| C  | 0.000000000  | -3.424408000 | 0.000000000  |
| C  | 0.000000000  | -4.909992000 | 0.000000000  |
| C  | 0.000000000  | -7.708984000 | 0.000000000  |
| C  | 0.821150000  | 7.009136000  | -0.888330000 |
| C  | 0.821150000  | -7.009136000 | 0.888330000  |
| C  | 0.827255000  | 5.616438000  | -0.881738000 |
| C  | 0.827255000  | -5.616438000 | 0.881738000  |
| C  | 1.174412000  | 2.758881000  | 0.406837000  |
| C  | 1.174412000  | -2.758881000 | -0.406837000 |
| C  | 2.346679000  | 3.321386000  | 1.054669000  |
| C  | 2.346679000  | -3.321386000 | -1.054669000 |
| C  | 2.758881000  | 1.174412000  | 0.406837000  |
| C  | 2.758881000  | -1.174412000 | -0.406837000 |
| C  | 3.321386000  | 2.346679000  | 1.054669000  |
| C  | 3.321386000  | -2.346679000 | -1.054669000 |
| C  | 3.424408000  | 0.000000000  | 0.000000000  |
| C  | 4.909992000  | 0.000000000  | 0.000000000  |
| C  | 5.616438000  | 0.827255000  | -0.881738000 |
| C  | 5.616438000  | -0.827255000 | 0.881738000  |

|   |              |              |              |
|---|--------------|--------------|--------------|
| C | 7.009136000  | 0.821150000  | -0.888330000 |
| C | 7.009136000  | -0.821150000 | 0.888330000  |
| C | 7.708984000  | 0.000000000  | 0.000000000  |
| C | -0.821150000 | 7.009136000  | 0.888330000  |
| C | -0.821150000 | -7.009136000 | -0.888330000 |
| C | -0.827255000 | 5.616438000  | 0.881738000  |
| C | -0.827255000 | -5.616438000 | -0.881738000 |
| C | -1.174412000 | 2.758881000  | -0.406837000 |
| C | -1.174412000 | -2.758881000 | 0.406837000  |
| C | -2.346679000 | 3.321386000  | -1.054669000 |
| C | -2.346679000 | -3.321386000 | 1.054669000  |
| C | -2.758881000 | 1.174412000  | -0.406837000 |
| C | -2.758881000 | -1.174412000 | 0.406837000  |
| C | -3.321386000 | 2.346679000  | -1.054669000 |
| C | -3.321386000 | -2.346679000 | 1.054669000  |
| C | -3.424408000 | 0.000000000  | 0.000000000  |
| C | -4.909992000 | 0.000000000  | 0.000000000  |
| C | -5.616438000 | 0.827255000  | 0.881738000  |
| C | -5.616438000 | -0.827255000 | -0.881738000 |
| C | -7.009136000 | 0.821150000  | 0.888330000  |
| C | -7.009136000 | -0.821150000 | -0.888330000 |
| C | -7.708984000 | 0.000000000  | 0.000000000  |
| H | 0.000000000  | 8.798581000  | 0.000000000  |
| H | 0.000000000  | -8.798581000 | 0.000000000  |
| H | 1.461018000  | 7.550377000  | -1.583732000 |
| H | 1.461018000  | -7.550377000 | 1.583732000  |
| H | 1.468826000  | 5.062102000  | -1.565527000 |
| H | 1.468826000  | -5.062102000 | 1.565527000  |
| H | 5.062102000  | 1.468826000  | -1.565527000 |
| H | 5.062102000  | -1.468826000 | 1.565527000  |
| H | 7.550377000  | 1.461018000  | -1.583732000 |
| H | 7.550377000  | -1.461018000 | 1.583732000  |
| H | 8.798581000  | 0.000000000  | 0.000000000  |
| H | -1.461018000 | 7.550377000  | 1.583732000  |
| H | -1.461018000 | -7.550377000 | -1.583732000 |
| H | -1.468826000 | 5.062102000  | 1.565527000  |
| H | -1.468826000 | -5.062102000 | -1.565527000 |
| H | -5.062102000 | 1.468826000  | 1.565527000  |
| H | -5.062102000 | -1.468826000 | -1.565527000 |
| H | -7.550377000 | 1.461018000  | 1.583732000  |
| H | -7.550377000 | -1.461018000 | -1.583732000 |
| H | -8.798581000 | 0.000000000  | 0.000000000  |
| N | 1.435327000  | 1.435327000  | 0.123335000  |
| N | 1.435327000  | -1.435327000 | -0.123335000 |
| N | -1.435327000 | 1.435327000  | -0.123335000 |
| N | -1.435327000 | -1.435327000 | 0.123335000  |

20. Zn[Br<sub>8</sub>TPP]; S = 0 (ruffled)

|    |              |              |              |
|----|--------------|--------------|--------------|
| Zn | 0.000000000  | 0.000000000  | 0.000000000  |
| Br | 1.502098000  | 5.843852000  | -0.748869000 |
| Br | 1.502098000  | -5.843852000 | 0.748869000  |
| Br | 5.843852000  | 1.502098000  | -0.748869000 |
| Br | 5.843852000  | -1.502098000 | 0.748869000  |
| Br | -1.502098000 | 5.843852000  | 0.748869000  |
| Br | -1.502098000 | -5.843852000 | -0.748869000 |
| Br | -5.843852000 | 1.502098000  | 0.748869000  |
| Br | -5.843852000 | -1.502098000 | -0.748869000 |
| C  | 0.641718000  | 4.237708000  | -0.247867000 |
| C  | 0.641718000  | -4.237708000 | 0.247867000  |
| C  | 1.077878000  | 2.848899000  | -0.323798000 |
| C  | 1.077878000  | -2.848899000 | 0.323798000  |
| C  | 2.394552000  | 2.394552000  | -0.540687000 |
| C  | 2.394552000  | -2.394552000 | 0.540687000  |
| C  | 2.848899000  | 1.077878000  | -0.323798000 |
| C  | 2.848899000  | -1.077878000 | 0.323798000  |
| C  | 3.418485000  | 3.418485000  | -0.904607000 |
| C  | 3.418485000  | -3.418485000 | 0.904607000  |
| C  | 3.691569000  | 3.691569000  | -2.247197000 |
| C  | 3.691569000  | -3.691569000 | 2.247197000  |
| C  | 4.109663000  | 4.109663000  | 0.096819000  |
| C  | 4.109663000  | -4.109663000 | -0.096819000 |
| C  | 4.237708000  | 0.641718000  | -0.247867000 |
| C  | 4.237708000  | -0.641718000 | 0.247867000  |
| C  | 4.647706000  | 4.647706000  | -2.586800000 |
| C  | 4.647706000  | -4.647706000 | 2.586800000  |
| C  | 5.064606000  | 5.064606000  | -0.240608000 |
| C  | 5.064606000  | -5.064606000 | 0.240608000  |
| C  | 5.335692000  | 5.335692000  | -1.584232000 |
| C  | 5.335692000  | -5.335692000 | 1.584232000  |
| C  | -0.641718000 | 4.237708000  | 0.247867000  |
| C  | -0.641718000 | -4.237708000 | -0.247867000 |
| C  | -1.077878000 | 2.848899000  | 0.323798000  |
| C  | -1.077878000 | -2.848899000 | -0.323798000 |
| C  | -2.394552000 | 2.394552000  | 0.540687000  |
| C  | -2.394552000 | -2.394552000 | -0.540687000 |
| C  | -2.848899000 | 1.077878000  | 0.323798000  |
| C  | -2.848899000 | -1.077878000 | -0.323798000 |
| C  | -3.418485000 | 3.418485000  | 0.904607000  |
| C  | -3.418485000 | -3.418485000 | -0.904607000 |
| C  | -3.691569000 | 3.691569000  | 2.247197000  |
| C  | -3.691569000 | -3.691569000 | -2.247197000 |
| C  | -4.109663000 | 4.109663000  | -0.096819000 |
| C  | -4.109663000 | -4.109663000 | 0.096819000  |
| C  | -4.237708000 | 0.641718000  | 0.247867000  |
| C  | -4.237708000 | -0.641718000 | -0.247867000 |
| C  | -4.647706000 | 4.647706000  | 2.586800000  |

|   |              |              |              |
|---|--------------|--------------|--------------|
| C | -4.647706000 | -4.647706000 | -2.586800000 |
| C | -5.064606000 | 5.064606000  | 0.240608000  |
| C | -5.064606000 | -5.064606000 | -0.240608000 |
| C | -5.335692000 | 5.335692000  | 1.584232000  |
| C | -5.335692000 | -5.335692000 | -1.584232000 |
| H | 3.150533000  | 3.150533000  | -3.022296000 |
| H | 3.150533000  | -3.150533000 | 3.022296000  |
| H | 3.890220000  | 3.890220000  | 1.140790000  |
| H | 3.890220000  | -3.890220000 | -1.140790000 |
| H | 4.856363000  | 4.856363000  | -3.635115000 |
| H | 4.856363000  | -4.856363000 | 3.635115000  |
| H | 5.598215000  | 5.598215000  | 0.544378000  |
| H | 5.598215000  | -5.598215000 | -0.544378000 |
| H | 6.082861000  | 6.082861000  | -1.850285000 |
| H | 6.082861000  | -6.082861000 | 1.850285000  |
| H | -3.150533000 | 3.150533000  | 3.022296000  |
| H | -3.150533000 | -3.150533000 | -3.022296000 |
| H | -3.890220000 | 3.890220000  | -1.140790000 |
| H | -3.890220000 | -3.890220000 | 1.140790000  |
| H | -4.856363000 | 4.856363000  | 3.635115000  |
| H | -4.856363000 | -4.856363000 | -3.635115000 |
| H | -5.598215000 | 5.598215000  | -0.544378000 |
| H | -5.598215000 | -5.598215000 | 0.544378000  |
| H | -6.082861000 | 6.082861000  | 1.850285000  |
| H | -6.082861000 | -6.082861000 | -1.850285000 |
| N | 0.000000000  | 2.045410000  | 0.000000000  |
| N | 0.000000000  | -2.045410000 | 0.000000000  |
| N | 2.045410000  | 0.000000000  | 0.000000000  |
| N | -2.045410000 | 0.000000000  | 0.000000000  |

**21. Cu[Cl<sub>8</sub>TPP]; S = ½ (saddled)**

|    |             |              |              |
|----|-------------|--------------|--------------|
| Cu | 0.000000000 | 0.000000000  | 0.000000000  |
| C  | 0.000000000 | 3.412854000  | 0.000000000  |
| C  | 0.000000000 | 4.897934000  | 0.000000000  |
| C  | 0.000000000 | 7.697475000  | 0.000000000  |
| C  | 0.000000000 | -3.412854000 | 0.000000000  |
| C  | 0.000000000 | -4.897934000 | 0.000000000  |
| C  | 0.000000000 | -7.697475000 | 0.000000000  |
| C  | 0.838970000 | 6.997427000  | -0.871333000 |
| C  | 0.838970000 | -6.997427000 | 0.871333000  |
| C  | 0.844376000 | 5.604352000  | -0.865409000 |
| C  | 0.844376000 | -5.604352000 | 0.865409000  |
| C  | 1.155408000 | 2.731889000  | 0.412408000  |
| C  | 1.155408000 | -2.731889000 | -0.412408000 |
| C  | 2.320174000 | 3.292289000  | 1.068583000  |
| C  | 2.320174000 | -3.292289000 | -1.068583000 |
| C  | 2.731889000 | 1.155408000  | 0.412408000  |
| C  | 2.731889000 | -1.155408000 | -0.412408000 |
| C  | 3.292289000 | 2.320174000  | 1.068583000  |

|    |              |              |              |
|----|--------------|--------------|--------------|
| C  | 3.292289000  | -2.320174000 | -1.068583000 |
| C  | 3.412854000  | 0.000000000  | 0.000000000  |
| C  | 4.897934000  | 0.000000000  | 0.000000000  |
| C  | 5.604352000  | 0.844376000  | -0.865409000 |
| C  | 5.604352000  | -0.844376000 | 0.865409000  |
| C  | 6.997427000  | 0.838970000  | -0.871333000 |
| C  | 6.997427000  | -0.838970000 | 0.871333000  |
| C  | 7.697475000  | 0.000000000  | 0.000000000  |
| C  | -0.838970000 | 6.997427000  | 0.871333000  |
| C  | -0.838970000 | -6.997427000 | -0.871333000 |
| C  | -0.844376000 | 5.604352000  | 0.865409000  |
| C  | -0.844376000 | -5.604352000 | -0.865409000 |
| C  | -1.155408000 | 2.731889000  | -0.412408000 |
| C  | -1.155408000 | -2.731889000 | 0.412408000  |
| C  | -2.320174000 | 3.292289000  | -1.068583000 |
| C  | -2.320174000 | -3.292289000 | 1.068583000  |
| C  | -2.731889000 | 1.155408000  | -0.412408000 |
| C  | -2.731889000 | -1.155408000 | 0.412408000  |
| C  | -3.292289000 | 2.320174000  | -1.068583000 |
| C  | -3.292289000 | -2.320174000 | 1.068583000  |
| C  | -3.412854000 | 0.000000000  | 0.000000000  |
| C  | -4.897934000 | 0.000000000  | 0.000000000  |
| C  | -5.604352000 | 0.844376000  | 0.865409000  |
| C  | -5.604352000 | -0.844376000 | -0.865409000 |
| C  | -6.997427000 | 0.838970000  | 0.871333000  |
| C  | -6.997427000 | -0.838970000 | -0.871333000 |
| C  | -7.697475000 | 0.000000000  | 0.000000000  |
| C1 | 2.474166000  | 4.813402000  | 1.849153000  |
| C1 | 2.474166000  | -4.813402000 | -1.849153000 |
| C1 | 4.813402000  | 2.474166000  | 1.849153000  |
| C1 | 4.813402000  | -2.474166000 | -1.849153000 |
| C1 | -2.474166000 | 4.813402000  | -1.849153000 |
| C1 | -2.474166000 | -4.813402000 | 1.849153000  |
| C1 | -4.813402000 | 2.474166000  | -1.849153000 |
| C1 | -4.813402000 | -2.474166000 | 1.849153000  |
| H  | 0.000000000  | 8.787037000  | 0.000000000  |
| H  | 0.000000000  | -8.787037000 | 0.000000000  |
| H  | 1.492635000  | 7.538342000  | -1.554050000 |
| H  | 1.492635000  | -7.538342000 | 1.554050000  |
| H  | 1.500380000  | 5.050472000  | -1.536140000 |
| H  | 1.500380000  | -5.050472000 | 1.536140000  |
| H  | 5.050472000  | 1.500380000  | -1.536140000 |
| H  | 5.050472000  | -1.500380000 | 1.536140000  |
| H  | 7.538342000  | 1.492635000  | -1.554050000 |
| H  | 7.538342000  | -1.492635000 | 1.554050000  |
| H  | 8.787037000  | 0.000000000  | 0.000000000  |
| H  | -1.492635000 | 7.538342000  | 1.554050000  |
| H  | -1.492635000 | -7.538342000 | -1.554050000 |
| H  | -1.500380000 | 5.050472000  | 1.536140000  |
| H  | -1.500380000 | -5.050472000 | -1.536140000 |
| H  | -5.050472000 | 1.500380000  | 1.536140000  |



|   |              |              |              |
|---|--------------|--------------|--------------|
| H | -5.050472000 | -1.500380000 | -1.536140000 |
| H | -7.538342000 | 1.492635000  | 1.554050000  |
| H | -7.538342000 | -1.492635000 | -1.554050000 |
| H | -8.787037000 | 0.000000000  | 0.000000000  |
| N | 1.408687000  | 1.408687000  | 0.117203000  |
| N | 1.408687000  | -1.408687000 | -0.117203000 |
| N | -1.408687000 | 1.408687000  | -0.117203000 |
| N | -1.408687000 | -1.408687000 | 0.117203000  |

**22. Cu[Cl<sub>8</sub>TPP]; S = ½ (ruffled)**

|    |              |              |              |
|----|--------------|--------------|--------------|
| Cu | 0.000000000  | 0.000000000  | 0.000000000  |
| C  | 0.622653000  | 4.182152000  | -0.288540000 |
| C  | 0.622653000  | -4.182152000 | 0.288540000  |
| C  | 1.051099000  | 2.796314000  | -0.388781000 |
| C  | 1.051099000  | -2.796314000 | 0.388781000  |
| C  | 2.357049000  | 2.357049000  | -0.655968000 |
| C  | 2.357049000  | -2.357049000 | 0.655968000  |
| C  | 2.796314000  | 1.051099000  | -0.388781000 |
| C  | 2.796314000  | -1.051099000 | 0.388781000  |
| C  | 3.362987000  | 3.362987000  | -1.109088000 |
| C  | 3.362987000  | -3.362987000 | 1.109088000  |
| C  | 3.572891000  | 3.572891000  | -2.473696000 |
| C  | 3.572891000  | -3.572891000 | 2.473696000  |
| C  | 4.100011000  | 4.100011000  | -0.174932000 |
| C  | 4.100011000  | -4.100011000 | 0.174932000  |
| C  | 4.182152000  | 0.622653000  | -0.288540000 |
| C  | 4.182152000  | -0.622653000 | 0.288540000  |
| C  | 4.511954000  | 4.511954000  | -2.902476000 |
| C  | 4.511954000  | -4.511954000 | 2.902476000  |
| C  | 5.036876000  | 5.036876000  | -0.600817000 |
| C  | 5.036876000  | -5.036876000 | 0.600817000  |
| C  | 5.245205000  | 5.245205000  | -1.967246000 |
| C  | 5.245205000  | -5.245205000 | 1.967246000  |
| C  | -0.622653000 | 4.182152000  | 0.288540000  |
| C  | -0.622653000 | -4.182152000 | -0.288540000 |
| C  | -1.051099000 | 2.796314000  | 0.388781000  |
| C  | -1.051099000 | -2.796314000 | -0.388781000 |
| C  | -2.357049000 | 2.357049000  | 0.655968000  |
| C  | -2.357049000 | -2.357049000 | -0.655968000 |
| C  | -2.796314000 | 1.051099000  | 0.388781000  |
| C  | -2.796314000 | -1.051099000 | -0.388781000 |
| C  | -3.362987000 | 3.362987000  | 1.109088000  |
| C  | -3.362987000 | -3.362987000 | -1.109088000 |
| C  | -3.572891000 | 3.572891000  | 2.473696000  |
| C  | -3.572891000 | -3.572891000 | -2.473696000 |
| C  | -4.100011000 | 4.100011000  | 0.174932000  |
| C  | -4.100011000 | -4.100011000 | -0.174932000 |
| C  | -4.182152000 | 0.622653000  | 0.288540000  |
| C  | -4.182152000 | -0.622653000 | -0.288540000 |

|    |              |              |              |
|----|--------------|--------------|--------------|
| C  | -4.511954000 | 4.511954000  | 2.902476000  |
| C  | -4.511954000 | -4.511954000 | -2.902476000 |
| C  | -5.036876000 | 5.036876000  | 0.600817000  |
| C  | -5.036876000 | -5.036876000 | -0.600817000 |
| C  | -5.245205000 | 5.245205000  | 1.967246000  |
| C  | -5.245205000 | -5.245205000 | -1.967246000 |
| Cl | 1.413574000  | 5.629531000  | -0.765805000 |
| Cl | 1.413574000  | -5.629531000 | 0.765805000  |
| Cl | 5.629531000  | 1.413574000  | -0.765805000 |
| Cl | 5.629531000  | -1.413574000 | 0.765805000  |
| Cl | -1.413574000 | 5.629531000  | 0.765805000  |
| Cl | -1.413574000 | -5.629531000 | -0.765805000 |
| Cl | -5.629531000 | 1.413574000  | 0.765805000  |
| Cl | -5.629531000 | -1.413574000 | -0.765805000 |
| H  | 2.997119000  | 2.997119000  | -3.197470000 |
| H  | 2.997119000  | -2.997119000 | 3.197470000  |
| H  | 3.930429000  | 3.930429000  | 0.887651000  |
| H  | 3.930429000  | -3.930429000 | -0.887651000 |
| H  | 4.670526000  | 4.670526000  | -3.968236000 |
| H  | 4.670526000  | -4.670526000 | 3.968236000  |
| H  | 5.605792000  | 5.605792000  | 0.133066000  |
| H  | 5.605792000  | -5.605792000 | -0.133066000 |
| H  | 5.978324000  | 5.978324000  | -2.302294000 |
| H  | 5.978324000  | -5.978324000 | 2.302294000  |
| H  | -2.997119000 | 2.997119000  | 3.197470000  |
| H  | -2.997119000 | -2.997119000 | -3.197470000 |
| H  | -3.930429000 | 3.930429000  | -0.887651000 |
| H  | -3.930429000 | -3.930429000 | 0.887651000  |
| H  | -4.670526000 | 4.670526000  | 3.968236000  |
| H  | -4.670526000 | -4.670526000 | -3.968236000 |
| H  | -5.605792000 | 5.605792000  | -0.133066000 |
| H  | -5.605792000 | -5.605792000 | 0.133066000  |
| H  | -5.978324000 | 5.978324000  | 2.302294000  |
| H  | -5.978324000 | -5.978324000 | -2.302294000 |
| N  | 0.000000000  | 1.989719000  | 0.000000000  |
| N  | 0.000000000  | -1.989719000 | 0.000000000  |
| N  | 1.989719000  | 0.000000000  | 0.000000000  |
| N  | -1.989719000 | 0.000000000  | 0.000000000  |

**23. Ni[Cl<sub>8</sub>TPP]; S = 0 (saddled)**

|    |             |              |              |
|----|-------------|--------------|--------------|
| Ni | 0.000000000 | 0.000000000  | 0.000000000  |
| C  | 0.000000000 | 3.375073000  | 0.000000000  |
| C  | 0.000000000 | 4.860166000  | 0.000000000  |
| C  | 0.000000000 | 7.659527000  | 0.000000000  |
| C  | 0.000000000 | -3.375073000 | 0.000000000  |
| C  | 0.000000000 | -4.860166000 | 0.000000000  |
| C  | 0.000000000 | -7.659527000 | 0.000000000  |
| C  | 0.889757000 | 6.959401000  | -0.819242000 |
| C  | 0.889757000 | -6.959401000 | 0.819242000  |

|    |              |              |              |
|----|--------------|--------------|--------------|
| C  | 0.894153000  | 5.566054000  | -0.813687000 |
| C  | 0.894153000  | -5.566054000 | 0.813687000  |
| C  | 1.103355000  | 2.676353000  | 0.492433000  |
| C  | 1.103355000  | -2.676353000 | -0.492433000 |
| C  | 2.247687000  | 3.217989000  | 1.193158000  |
| C  | 2.247687000  | -3.217989000 | -1.193158000 |
| C  | 2.676353000  | 1.103355000  | 0.492433000  |
| C  | 2.676353000  | -1.103355000 | -0.492433000 |
| C  | 3.217989000  | 2.247687000  | 1.193158000  |
| C  | 3.217989000  | -2.247687000 | -1.193158000 |
| C  | 3.375073000  | 0.000000000  | 0.000000000  |
| C  | 4.860166000  | 0.000000000  | 0.000000000  |
| C  | 5.566054000  | 0.894153000  | -0.813687000 |
| C  | 5.566054000  | -0.894153000 | 0.813687000  |
| C  | 6.959401000  | 0.889757000  | -0.819242000 |
| C  | 6.959401000  | -0.889757000 | 0.819242000  |
| C  | 7.659527000  | 0.000000000  | 0.000000000  |
| C  | -0.889757000 | 6.959401000  | 0.819242000  |
| C  | -0.889757000 | -6.959401000 | -0.819242000 |
| C  | -0.894153000 | 5.566054000  | 0.813687000  |
| C  | -0.894153000 | -5.566054000 | -0.813687000 |
| C  | -1.103355000 | 2.676353000  | -0.492433000 |
| C  | -1.103355000 | -2.676353000 | 0.492433000  |
| C  | -2.247687000 | 3.217989000  | -1.193158000 |
| C  | -2.247687000 | -3.217989000 | 1.193158000  |
| C  | -2.676353000 | 1.103355000  | -0.492433000 |
| C  | -2.676353000 | -1.103355000 | 0.492433000  |
| C  | -3.217989000 | 2.247687000  | -1.193158000 |
| C  | -3.217989000 | -2.247687000 | 1.193158000  |
| C  | -3.375073000 | 0.000000000  | 0.000000000  |
| C  | -4.860166000 | 0.000000000  | 0.000000000  |
| C  | -5.566054000 | 0.894153000  | 0.813687000  |
| C  | -5.566054000 | -0.894153000 | -0.813687000 |
| C  | -6.959401000 | 0.889757000  | 0.819242000  |
| C  | -6.959401000 | -0.889757000 | -0.819242000 |
| C  | -7.659527000 | 0.000000000  | 0.000000000  |
| C1 | 2.371307000  | 4.728356000  | 1.996839000  |
| C1 | 2.371307000  | -4.728356000 | -1.996839000 |
| C1 | 4.728356000  | 2.371307000  | 1.996839000  |
| C1 | 4.728356000  | -2.371307000 | -1.996839000 |
| C1 | -2.371307000 | 4.728356000  | -1.996839000 |
| C1 | -2.371307000 | -4.728356000 | 1.996839000  |
| C1 | -4.728356000 | 2.371307000  | -1.996839000 |
| C1 | -4.728356000 | -2.371307000 | 1.996839000  |
| H  | 0.000000000  | 8.749081000  | 0.000000000  |
| H  | 0.000000000  | -8.749081000 | 0.000000000  |
| H  | 1.583660000  | 7.500274000  | -1.461113000 |
| H  | 1.583660000  | -7.500274000 | 1.461113000  |
| H  | 1.588932000  | 5.012107000  | -1.444088000 |
| H  | 1.588932000  | -5.012107000 | 1.444088000  |
| H  | 5.012107000  | 1.588932000  | -1.444088000 |

|   |              |              |              |
|---|--------------|--------------|--------------|
| H | 5.012107000  | -1.588932000 | 1.444088000  |
| H | 7.500274000  | 1.583660000  | -1.461113000 |
| H | 7.500274000  | -1.583660000 | 1.461113000  |
| H | 8.749081000  | 0.000000000  | 0.000000000  |
| H | -1.583660000 | 7.500274000  | 1.461113000  |
| H | -1.583660000 | -7.500274000 | -1.461113000 |
| H | -1.588932000 | 5.012107000  | 1.444088000  |
| H | -1.588932000 | -5.012107000 | -1.444088000 |
| H | -5.012107000 | 1.588932000  | 1.444088000  |
| H | -5.012107000 | -1.588932000 | -1.444088000 |
| H | -7.500274000 | 1.583660000  | 1.461113000  |
| H | -7.500274000 | -1.583660000 | -1.461113000 |
| H | -8.749081000 | 0.000000000  | 0.000000000  |
| N | 1.345020000  | 1.345020000  | 0.196700000  |
| N | 1.345020000  | -1.345020000 | -0.196700000 |
| N | -1.345020000 | 1.345020000  | -0.196700000 |
| N | -1.345020000 | -1.345020000 | 0.196700000  |

**24. Ni[Cl<sub>8</sub>TPP]; S = 0 (ruffled)**

|    |              |              |              |
|----|--------------|--------------|--------------|
| Ni | 0.000000000  | 0.000000000  | 0.000000000  |
| C  | 0.571832000  | 4.088052000  | -0.378787000 |
| C  | 0.571832000  | -4.088052000 | 0.378787000  |
| C  | 0.988964000  | 2.705531000  | -0.525557000 |
| C  | 0.988964000  | -2.705531000 | 0.525557000  |
| C  | 2.265976000  | 2.265976000  | -0.892932000 |
| C  | 2.265976000  | -2.265976000 | 0.892932000  |
| C  | 2.705531000  | 0.988964000  | -0.525557000 |
| C  | 2.705531000  | -0.988964000 | 0.525557000  |
| C  | 3.223780000  | 3.223780000  | -1.517406000 |
| C  | 3.223780000  | -3.223780000 | 1.517406000  |
| C  | 3.308587000  | 3.308587000  | -2.908776000 |
| C  | 3.308587000  | -3.308587000 | 2.908776000  |
| C  | 4.040105000  | 4.040105000  | -0.725510000 |
| C  | 4.040105000  | -4.040105000 | 0.725510000  |
| C  | 4.088052000  | 0.571832000  | -0.378787000 |
| C  | 4.088052000  | -0.571832000 | 0.378787000  |
| C  | 4.201509000  | 4.201509000  | -3.504841000 |
| C  | 4.201509000  | -4.201509000 | 3.504841000  |
| C  | 4.930461000  | 4.930461000  | -1.317579000 |
| C  | 4.930461000  | -4.930461000 | 1.317579000  |
| C  | 5.013427000  | 5.013427000  | -2.710726000 |
| C  | 5.013427000  | -5.013427000 | 2.710726000  |
| C  | -0.571832000 | 4.088052000  | 0.378787000  |
| C  | -0.571832000 | -4.088052000 | -0.378787000 |
| C  | -0.988964000 | 2.705531000  | 0.525557000  |
| C  | -0.988964000 | -2.705531000 | -0.525557000 |
| C  | -2.265976000 | 2.265976000  | 0.892932000  |
| C  | -2.265976000 | -2.265976000 | -0.892932000 |
| C  | -2.705531000 | 0.988964000  | 0.525557000  |

|    |              |              |              |
|----|--------------|--------------|--------------|
| C  | -2.705531000 | -0.988964000 | -0.525557000 |
| C  | -3.223780000 | 3.223780000  | 1.517406000  |
| C  | -3.223780000 | -3.223780000 | -1.517406000 |
| C  | -3.308587000 | 3.308587000  | 2.908776000  |
| C  | -3.308587000 | -3.308587000 | -2.908776000 |
| C  | -4.040105000 | 4.040105000  | 0.725510000  |
| C  | -4.040105000 | -4.040105000 | -0.725510000 |
| C  | -4.088052000 | 0.571832000  | 0.378787000  |
| C  | -4.088052000 | -0.571832000 | -0.378787000 |
| C  | -4.201509000 | 4.201509000  | 3.504841000  |
| C  | -4.201509000 | -4.201509000 | -3.504841000 |
| C  | -4.930461000 | 4.930461000  | 1.317579000  |
| C  | -4.930461000 | -4.930461000 | -1.317579000 |
| C  | -5.013427000 | 5.013427000  | 2.710726000  |
| C  | -5.013427000 | -5.013427000 | -2.710726000 |
| C1 | 1.295489000  | 5.521913000  | -0.981957000 |
| C1 | 1.295489000  | -5.521913000 | 0.981957000  |
| C1 | 5.521913000  | 1.295489000  | -0.981957000 |
| C1 | 5.521913000  | -1.295489000 | 0.981957000  |
| C1 | -1.295489000 | 5.521913000  | 0.981957000  |
| C1 | -1.295489000 | -5.521913000 | -0.981957000 |
| C1 | -5.521913000 | 1.295489000  | 0.981957000  |
| C1 | -5.521913000 | -1.295489000 | -0.981957000 |
| H  | 2.672108000  | 2.672108000  | -3.522575000 |
| H  | 2.672108000  | -2.672108000 | 3.522575000  |
| H  | 3.968660000  | 3.968660000  | 0.359029000  |
| H  | 3.968660000  | -3.968660000 | -0.359029000 |
| H  | 4.261692000  | 4.261692000  | -4.590583000 |
| H  | 4.261692000  | -4.261692000 | 4.590583000  |
| H  | 5.561026000  | 5.561026000  | -0.692514000 |
| H  | 5.561026000  | -5.561026000 | 0.692514000  |
| H  | 5.710101000  | 5.710101000  | -3.175986000 |
| H  | 5.710101000  | -5.710101000 | 3.175986000  |
| H  | -2.672108000 | 2.672108000  | 3.522575000  |
| H  | -2.672108000 | -2.672108000 | -3.522575000 |
| H  | -3.968660000 | 3.968660000  | -0.359029000 |
| H  | -3.968660000 | -3.968660000 | 0.359029000  |
| H  | -4.261692000 | 4.261692000  | 4.590583000  |
| H  | -4.261692000 | -4.261692000 | -4.590583000 |
| H  | -5.561026000 | 5.561026000  | 0.692514000  |
| H  | -5.561026000 | -5.561026000 | -0.692514000 |
| H  | -5.710101000 | 5.710101000  | 3.175986000  |
| H  | -5.710101000 | -5.710101000 | -3.175986000 |
| N  | 0.000000000  | 1.894139000  | 0.000000000  |
| N  | 0.000000000  | -1.894139000 | 0.000000000  |
| N  | 1.894139000  | 0.000000000  | 0.000000000  |
| N  | -1.894139000 | 0.000000000  | 0.000000000  |

25. Pd[Cl<sub>8</sub>TPP]; S = 0 (saddled)

|    |              |              |              |
|----|--------------|--------------|--------------|
| Pd | 0.000000000  | 0.000000000  | 0.000000000  |
| C  | 0.000000000  | 3.424764000  | 0.000000000  |
| C  | 0.000000000  | 4.911455000  | 0.000000000  |
| C  | 0.000000000  | 7.709696000  | 0.000000000  |
| C  | 0.000000000  | -3.424764000 | 0.000000000  |
| C  | 0.000000000  | -4.911455000 | 0.000000000  |
| C  | 0.000000000  | -7.709696000 | 0.000000000  |
| C  | 0.796018000  | 7.009795000  | -0.910799000 |
| C  | 0.796018000  | -7.009795000 | 0.910799000  |
| C  | 0.801610000  | 5.616663000  | -0.905140000 |
| C  | 0.801610000  | -5.616663000 | 0.905140000  |
| C  | 1.168075000  | 2.754152000  | 0.388325000  |
| C  | 1.168075000  | -2.754152000 | -0.388325000 |
| C  | 2.350764000  | 3.322000000  | 1.009233000  |
| C  | 2.350764000  | -3.322000000 | -1.009233000 |
| C  | 2.754152000  | 1.168075000  | 0.388325000  |
| C  | 2.754152000  | -1.168075000 | -0.388325000 |
| C  | 3.322000000  | 2.350764000  | 1.009233000  |
| C  | 3.322000000  | -2.350764000 | -1.009233000 |
| C  | 3.424764000  | 0.000000000  | 0.000000000  |
| C  | 4.911455000  | 0.000000000  | 0.000000000  |
| C  | 5.616663000  | 0.801610000  | -0.905140000 |
| C  | 5.616663000  | -0.801610000 | 0.905140000  |
| C  | 7.009795000  | 0.796018000  | -0.910799000 |
| C  | 7.009795000  | -0.796018000 | 0.910799000  |
| C  | 7.709696000  | 0.000000000  | 0.000000000  |
| C  | -0.796018000 | 7.009795000  | 0.910799000  |
| C  | -0.796018000 | -7.009795000 | -0.910799000 |
| C  | -0.801610000 | 5.616663000  | 0.905140000  |
| C  | -0.801610000 | -5.616663000 | -0.905140000 |
| C  | -1.168075000 | 2.754152000  | -0.388325000 |
| C  | -1.168075000 | -2.754152000 | 0.388325000  |
| C  | -2.350764000 | 3.322000000  | -1.009233000 |
| C  | -2.350764000 | -3.322000000 | 1.009233000  |
| C  | -2.754152000 | 1.168075000  | -0.388325000 |
| C  | -2.754152000 | -1.168075000 | 0.388325000  |
| C  | -3.322000000 | 2.350764000  | -1.009233000 |
| C  | -3.322000000 | -2.350764000 | 1.009233000  |
| C  | -3.424764000 | 0.000000000  | 0.000000000  |
| C  | -4.911455000 | 0.000000000  | 0.000000000  |
| C  | -5.616663000 | 0.801610000  | 0.905140000  |
| C  | -5.616663000 | -0.801610000 | -0.905140000 |
| C  | -7.009795000 | 0.796018000  | 0.910799000  |
| C  | -7.009795000 | -0.796018000 | -0.910799000 |
| C  | -7.709696000 | 0.000000000  | 0.000000000  |
| Cl | 2.524087000  | 4.856650000  | 1.757805000  |
| Cl | 2.524087000  | -4.856650000 | -1.757805000 |
| Cl | 4.856650000  | 2.524087000  | 1.757805000  |

|    |              |              |              |
|----|--------------|--------------|--------------|
| C1 | 4.856650000  | -2.524087000 | -1.757805000 |
| C1 | -2.524087000 | 4.856650000  | -1.757805000 |
| C1 | -2.524087000 | -4.856650000 | 1.757805000  |
| C1 | -4.856650000 | 2.524087000  | -1.757805000 |
| C1 | -4.856650000 | -2.524087000 | 1.757805000  |
| H  | 0.000000000  | 8.799235000  | 0.000000000  |
| H  | 0.000000000  | -8.799235000 | 0.000000000  |
| H  | 1.416247000  | 7.550677000  | -1.624020000 |
| H  | 1.416247000  | -7.550677000 | 1.624020000  |
| H  | 1.424646000  | 5.062389000  | -1.606225000 |
| H  | 1.424646000  | -5.062389000 | 1.606225000  |
| H  | 5.062389000  | 1.424646000  | -1.606225000 |
| H  | 5.062389000  | -1.424646000 | 1.606225000  |
| H  | 7.550677000  | 1.416247000  | -1.624020000 |
| H  | 7.550677000  | -1.416247000 | 1.624020000  |
| H  | 8.799235000  | 0.000000000  | 0.000000000  |
| H  | -1.416247000 | 7.550677000  | 1.624020000  |
| H  | -1.416247000 | -7.550677000 | -1.624020000 |
| H  | -1.424646000 | 5.062389000  | 1.606225000  |
| H  | -1.424646000 | -5.062389000 | -1.606225000 |
| H  | -5.062389000 | 1.424646000  | 1.606225000  |
| H  | -5.062389000 | -1.424646000 | -1.606225000 |
| H  | -7.550677000 | 1.416247000  | 1.624020000  |
| H  | -7.550677000 | -1.416247000 | -1.624020000 |
| H  | -8.799235000 | 0.000000000  | 0.000000000  |
| N  | 1.425004000  | 1.425004000  | 0.112717000  |
| N  | 1.425004000  | -1.425004000 | -0.112717000 |
| N  | -1.425004000 | 1.425004000  | -0.112717000 |
| N  | -1.425004000 | -1.425004000 | 0.112717000  |

**26. Pd[Cl<sub>3</sub>TPP]; S = 0 (ruffled)**

|    |             |              |              |
|----|-------------|--------------|--------------|
| Pd | 0.000000000 | 0.000000000  | 0.000000000  |
| C  | 0.644682000 | 4.218940000  | -0.231834000 |
| C  | 0.644682000 | -4.218940000 | 0.231834000  |
| C  | 1.081011000 | 2.832468000  | -0.310849000 |
| C  | 1.081011000 | -2.832468000 | 0.310849000  |
| C  | 2.396101000 | 2.396101000  | -0.520275000 |
| C  | 2.396101000 | -2.396101000 | 0.520275000  |
| C  | 2.832468000 | 1.081011000  | -0.310849000 |
| C  | 2.832468000 | -1.081011000 | 0.310849000  |
| C  | 3.421594000 | 3.421594000  | -0.877419000 |
| C  | 3.421594000 | -3.421594000 | 0.877419000  |
| C  | 3.696318000 | 3.696318000  | -2.218745000 |
| C  | 3.696318000 | -3.696318000 | 2.218745000  |
| C  | 4.110797000 | 4.110797000  | 0.126341000  |
| C  | 4.110797000 | -4.110797000 | -0.126341000 |
| C  | 4.218940000 | 0.644682000  | -0.231834000 |
| C  | 4.218940000 | -0.644682000 | 0.231834000  |
| C  | 4.653587000 | 4.653587000  | -2.555466000 |

|    |              |              |              |
|----|--------------|--------------|--------------|
| C  | 4.653587000  | -4.653587000 | 2.555466000  |
| C  | 5.066170000  | 5.066170000  | -0.208069000 |
| C  | 5.066170000  | -5.066170000 | 0.208069000  |
| C  | 5.339854000  | 5.339854000  | -1.551162000 |
| C  | 5.339854000  | -5.339854000 | 1.551162000  |
| C  | -0.644682000 | 4.218940000  | 0.231834000  |
| C  | -0.644682000 | -4.218940000 | -0.231834000 |
| C  | -1.081011000 | 2.832468000  | 0.310849000  |
| C  | -1.081011000 | -2.832468000 | -0.310849000 |
| C  | -2.396101000 | 2.396101000  | 0.520275000  |
| C  | -2.396101000 | -2.396101000 | -0.520275000 |
| C  | -2.832468000 | 1.081011000  | 0.310849000  |
| C  | -2.832468000 | -1.081011000 | -0.310849000 |
| C  | -3.421594000 | 3.421594000  | 0.877419000  |
| C  | -3.421594000 | -3.421594000 | -0.877419000 |
| C  | -3.696318000 | 3.696318000  | 2.218745000  |
| C  | -3.696318000 | -3.696318000 | -2.218745000 |
| C  | -4.110797000 | 4.110797000  | -0.126341000 |
| C  | -4.110797000 | -4.110797000 | 0.126341000  |
| C  | -4.218940000 | 0.644682000  | 0.231834000  |
| C  | -4.218940000 | -0.644682000 | -0.231834000 |
| C  | -4.653587000 | 4.653587000  | 2.555466000  |
| C  | -4.653587000 | -4.653587000 | -2.555466000 |
| C  | -5.066170000 | 5.066170000  | 0.208069000  |
| C  | -5.066170000 | -5.066170000 | -0.208069000 |
| C  | -5.339854000 | 5.339854000  | 1.551162000  |
| C  | -5.339854000 | -5.339854000 | -1.551162000 |
| C1 | 1.475850000  | 5.670522000  | -0.618543000 |
| C1 | 1.475850000  | -5.670522000 | 0.618543000  |
| C1 | 5.670522000  | 1.475850000  | -0.618543000 |
| C1 | 5.670522000  | -1.475850000 | 0.618543000  |
| C1 | -1.475850000 | 5.670522000  | 0.618543000  |
| C1 | -1.475850000 | -5.670522000 | -0.618543000 |
| C1 | -5.670522000 | 1.475850000  | 0.618543000  |
| C1 | -5.670522000 | -1.475850000 | -0.618543000 |
| H  | 3.156502000  | 3.156502000  | -2.995839000 |
| H  | 3.156502000  | -3.156502000 | 2.995839000  |
| H  | 3.889953000  | 3.889953000  | 1.169920000  |
| H  | 3.889953000  | -3.889953000 | -1.169920000 |
| H  | 4.863558000  | 4.863558000  | -3.603267000 |
| H  | 4.863558000  | -4.863558000 | 3.603267000  |
| H  | 5.598439000  | 5.598439000  | 0.578845000  |
| H  | 5.598439000  | -5.598439000 | -0.578845000 |
| H  | 6.087450000  | 6.087450000  | -1.814548000 |
| H  | 6.087450000  | -6.087450000 | 1.814548000  |
| H  | -3.156502000 | 3.156502000  | 2.995839000  |
| H  | -3.156502000 | -3.156502000 | -2.995839000 |
| H  | -3.889953000 | 3.889953000  | -1.169920000 |
| H  | -3.889953000 | -3.889953000 | 1.169920000  |
| H  | -4.863558000 | 4.863558000  | 3.603267000  |
| H  | -4.863558000 | -4.863558000 | -3.603267000 |



|   |              |              |              |
|---|--------------|--------------|--------------|
| H | -5.598439000 | 5.598439000  | -0.578845000 |
| H | -5.598439000 | -5.598439000 | 0.578845000  |
| H | -6.087450000 | 6.087450000  | 1.814548000  |
| H | -6.087450000 | -6.087450000 | -1.814548000 |
| N | 0.000000000  | 2.027486000  | 0.000000000  |
| N | 0.000000000  | -2.027486000 | 0.000000000  |
| N | 2.027486000  | 0.000000000  | 0.000000000  |
| N | -2.027486000 | 0.000000000  | 0.000000000  |

**27. Pt[Cl<sub>8</sub>TPP]; S = 0 (saddled)**

|    |              |              |              |
|----|--------------|--------------|--------------|
| Pt | 0.000000000  | 0.000000000  | 0.000000000  |
| C  | 0.000000000  | 3.427560000  | 0.000000000  |
| C  | 0.000000000  | 4.916076000  | 0.000000000  |
| C  | 0.000000000  | 7.713729000  | 0.000000000  |
| C  | 0.000000000  | -3.427560000 | 0.000000000  |
| C  | 0.000000000  | -4.916076000 | 0.000000000  |
| C  | 0.000000000  | -7.713729000 | 0.000000000  |
| C  | 0.754341000  | 7.013874000  | -0.945556000 |
| C  | 0.754341000  | -7.013874000 | 0.945556000  |
| C  | 0.759529000  | 5.620608000  | -0.940691000 |
| C  | 0.759529000  | -5.620608000 | 0.940691000  |
| C  | 1.172099000  | 2.761277000  | 0.381043000  |
| C  | 1.172099000  | -2.761277000 | -0.381043000 |
| C  | 2.367673000  | 3.338077000  | 0.965223000  |
| C  | 2.367673000  | -3.338077000 | -0.965223000 |
| C  | 2.761277000  | 1.172099000  | 0.381043000  |
| C  | 2.761277000  | -1.172099000 | -0.381043000 |
| C  | 3.338077000  | 2.367673000  | 0.965223000  |
| C  | 3.338077000  | -2.367673000 | -0.965223000 |
| C  | 3.427560000  | 0.000000000  | 0.000000000  |
| C  | 4.916076000  | 0.000000000  | 0.000000000  |
| C  | 5.620608000  | 0.759529000  | -0.940691000 |
| C  | 5.620608000  | -0.759529000 | 0.940691000  |
| C  | 7.013874000  | 0.754341000  | -0.945556000 |
| C  | 7.013874000  | -0.754341000 | 0.945556000  |
| C  | 7.713729000  | 0.000000000  | 0.000000000  |
| C  | -0.754341000 | 7.013874000  | 0.945556000  |
| C  | -0.754341000 | -7.013874000 | -0.945556000 |
| C  | -0.759529000 | 5.620608000  | 0.940691000  |
| C  | -0.759529000 | -5.620608000 | -0.940691000 |
| C  | -1.172099000 | 2.761277000  | -0.381043000 |
| C  | -1.172099000 | -2.761277000 | 0.381043000  |
| C  | -2.367673000 | 3.338077000  | -0.965223000 |
| C  | -2.367673000 | -3.338077000 | 0.965223000  |
| C  | -2.761277000 | 1.172099000  | -0.381043000 |
| C  | -2.761277000 | -1.172099000 | 0.381043000  |
| C  | -3.338077000 | 2.367673000  | -0.965223000 |
| C  | -3.338077000 | -2.367673000 | 0.965223000  |
| C  | -3.427560000 | 0.000000000  | 0.000000000  |

|    |              |              |              |
|----|--------------|--------------|--------------|
| C  | -4.916076000 | 0.000000000  | 0.000000000  |
| C  | -5.620608000 | 0.759529000  | 0.940691000  |
| C  | -5.620608000 | -0.759529000 | -0.940691000 |
| C  | -7.013874000 | 0.754341000  | 0.945556000  |
| C  | -7.013874000 | -0.754341000 | -0.945556000 |
| C  | -7.713729000 | 0.000000000  | 0.000000000  |
| Cl | 2.562015000  | 4.887529000  | 1.676690000  |
| Cl | 2.562015000  | -4.887529000 | -1.676690000 |
| Cl | 4.887529000  | 2.562015000  | 1.676690000  |
| Cl | 4.887529000  | -2.562015000 | -1.676690000 |
| Cl | -2.562015000 | 4.887529000  | -1.676690000 |
| Cl | -2.562015000 | -4.887529000 | 1.676690000  |
| Cl | -4.887529000 | 2.562015000  | -1.676690000 |
| Cl | -4.887529000 | -2.562015000 | 1.676690000  |
| H  | 0.000000000  | 8.803266000  | 0.000000000  |
| H  | 0.000000000  | -8.803266000 | 0.000000000  |
| H  | 1.342068000  | 7.554815000  | -1.685794000 |
| H  | 1.342068000  | -7.554815000 | 1.685794000  |
| H  | 1.349743000  | 5.066260000  | -1.669593000 |
| H  | 1.349743000  | -5.066260000 | 1.669593000  |
| H  | 5.066260000  | 1.349743000  | -1.669593000 |
| H  | 5.066260000  | -1.349743000 | 1.669593000  |
| H  | 7.554815000  | 1.342068000  | -1.685794000 |
| H  | 7.554815000  | -1.342068000 | 1.685794000  |
| H  | 8.803266000  | 0.000000000  | 0.000000000  |
| H  | -1.342068000 | 7.554815000  | 1.685794000  |
| H  | -1.342068000 | -7.554815000 | -1.685794000 |
| H  | -1.349743000 | 5.066260000  | 1.669593000  |
| H  | -1.349743000 | -5.066260000 | -1.669593000 |
| H  | -5.066260000 | 1.349743000  | 1.669593000  |
| H  | -5.066260000 | -1.349743000 | -1.669593000 |
| H  | -7.554815000 | 1.342068000  | 1.685794000  |
| H  | -7.554815000 | -1.342068000 | -1.685794000 |
| H  | -8.803266000 | 0.000000000  | 0.000000000  |
| N  | 1.421301000  | 1.421301000  | 0.136661000  |
| N  | 1.421301000  | -1.421301000 | -0.136661000 |
| N  | -1.421301000 | 1.421301000  | -0.136661000 |
| N  | -1.421301000 | -1.421301000 | 0.136661000  |

**28. Pt[Cl<sub>8</sub>TPP]; S = 0 (ruffled)**

|    |             |              |              |
|----|-------------|--------------|--------------|
| Pt | 0.000000000 | 0.000000000  | 0.000000000  |
| C  | 0.647422000 | 4.221104000  | -0.222723000 |
| C  | 0.647422000 | -4.221104000 | 0.222723000  |
| C  | 1.085739000 | 2.837401000  | -0.299174000 |
| C  | 1.085739000 | -2.837401000 | 0.299174000  |
| C  | 2.401545000 | 2.401545000  | -0.500571000 |
| C  | 2.401545000 | -2.401545000 | 0.500571000  |
| C  | 2.837401000 | 1.085739000  | -0.299174000 |
| C  | 2.837401000 | -1.085739000 | 0.299174000  |

|    |              |              |              |
|----|--------------|--------------|--------------|
| C  | 3.429675000  | 3.429675000  | -0.843845000 |
| C  | 3.429675000  | -3.429675000 | 0.843845000  |
| C  | 3.713427000  | 3.713427000  | -2.181447000 |
| C  | 3.713427000  | -3.713427000 | 2.181447000  |
| C  | 4.111770000  | 4.111770000  | 0.169544000  |
| C  | 4.111770000  | -4.111770000 | -0.169544000 |
| C  | 4.221104000  | 0.647422000  | -0.222723000 |
| C  | 4.221104000  | -0.647422000 | 0.222723000  |
| C  | 4.672949000  | 4.672949000  | -2.504901000 |
| C  | 4.672949000  | -4.672949000 | 2.504901000  |
| C  | 5.069401000  | 5.069401000  | -0.151811000 |
| C  | 5.069401000  | -5.069401000 | 0.151811000  |
| C  | 5.352253000  | 5.352253000  | -1.491117000 |
| C  | 5.352253000  | -5.352253000 | 1.491117000  |
| C  | -0.647422000 | 4.221104000  | 0.222723000  |
| C  | -0.647422000 | -4.221104000 | -0.222723000 |
| C  | -1.085739000 | 2.837401000  | 0.299174000  |
| C  | -1.085739000 | -2.837401000 | -0.299174000 |
| C  | -2.401545000 | 2.401545000  | 0.500571000  |
| C  | -2.401545000 | -2.401545000 | -0.500571000 |
| C  | -2.837401000 | 1.085739000  | 0.299174000  |
| C  | -2.837401000 | -1.085739000 | -0.299174000 |
| C  | -3.429675000 | 3.429675000  | 0.843845000  |
| C  | -3.429675000 | -3.429675000 | -0.843845000 |
| C  | -3.713427000 | 3.713427000  | 2.181447000  |
| C  | -3.713427000 | -3.713427000 | -2.181447000 |
| C  | -4.111770000 | 4.111770000  | -0.169544000 |
| C  | -4.111770000 | -4.111770000 | 0.169544000  |
| C  | -4.221104000 | 0.647422000  | 0.222723000  |
| C  | -4.221104000 | -0.647422000 | -0.222723000 |
| C  | -4.672949000 | 4.672949000  | 2.504901000  |
| C  | -4.672949000 | -4.672949000 | -2.504901000 |
| C  | -5.069401000 | 5.069401000  | 0.151811000  |
| C  | -5.069401000 | -5.069401000 | -0.151811000 |
| C  | -5.352253000 | 5.352253000  | 1.491117000  |
| C  | -5.352253000 | -5.352253000 | -1.491117000 |
| C1 | 1.483339000  | 5.673554000  | -0.595232000 |
| C1 | 1.483339000  | -5.673554000 | 0.595232000  |
| C1 | 5.673554000  | 1.483339000  | -0.595232000 |
| C1 | 5.673554000  | -1.483339000 | 0.595232000  |
| C1 | -1.483339000 | 5.673554000  | 0.595232000  |
| C1 | -1.483339000 | -5.673554000 | -0.595232000 |
| C1 | -5.673554000 | 1.483339000  | 0.595232000  |
| C1 | -5.673554000 | -1.483339000 | -0.595232000 |
| H  | 3.178831000  | 3.178831000  | -2.965733000 |
| H  | 3.178831000  | -3.178831000 | 2.965733000  |
| H  | 3.883628000  | 3.883628000  | 1.209981000  |
| H  | 3.883628000  | -3.883628000 | -1.209981000 |
| H  | 4.890147000  | 4.890147000  | -3.549740000 |
| H  | 4.890147000  | -4.890147000 | 3.549740000  |
| H  | 5.596287000  | 5.596287000  | 0.642333000  |

|   |              |              |              |
|---|--------------|--------------|--------------|
| H | 5.596287000  | -5.596287000 | -0.642333000 |
| H | 6.101646000  | 6.101646000  | -1.744187000 |
| H | 6.101646000  | -6.101646000 | 1.744187000  |
| H | -3.178831000 | 3.178831000  | 2.965733000  |
| H | -3.178831000 | -3.178831000 | -2.965733000 |
| H | -3.883628000 | 3.883628000  | -1.209981000 |
| H | -3.883628000 | -3.883628000 | 1.209981000  |
| H | -4.890147000 | 4.890147000  | 3.549740000  |
| H | -4.890147000 | -4.890147000 | -3.549740000 |
| H | -5.596287000 | 5.596287000  | -0.642333000 |
| H | -5.596287000 | -5.596287000 | 0.642333000  |
| H | -6.101646000 | 6.101646000  | 1.744187000  |
| H | -6.101646000 | -6.101646000 | -1.744187000 |
| N | 0.000000000  | 2.028486000  | 0.000000000  |
| N | 0.000000000  | -2.028486000 | 0.000000000  |
| N | 2.028486000  | 0.000000000  | 0.000000000  |
| N | -2.028486000 | 0.000000000  | 0.000000000  |

**29. Zn[Cl<sub>2</sub>TPP]; S = 0 (saddled)**

|    |              |              |              |
|----|--------------|--------------|--------------|
| Zn | 0.000000000  | 0.000000000  | 0.000000000  |
| C  | 0.000000000  | 3.433360000  | 0.000000000  |
| C  | 0.000000000  | 4.921250000  | 0.000000000  |
| C  | 0.000000000  | 7.720176000  | 0.000000000  |
| C  | 0.000000000  | -3.433360000 | 0.000000000  |
| C  | 0.000000000  | -4.921250000 | 0.000000000  |
| C  | 0.000000000  | -7.720176000 | 0.000000000  |
| C  | 0.749235000  | 7.020163000  | -0.949468000 |
| C  | 0.749235000  | -7.020163000 | 0.949468000  |
| C  | 0.754739000  | 5.626987000  | -0.944204000 |
| C  | 0.754739000  | -5.626987000 | 0.944204000  |
| C  | 1.187341000  | 2.770371000  | 0.364662000  |
| C  | 1.187341000  | -2.770371000 | -0.364662000 |
| C  | 2.382098000  | 3.355498000  | 0.944256000  |
| C  | 2.382098000  | -3.355498000 | -0.944256000 |
| C  | 2.770371000  | 1.187341000  | 0.364662000  |
| C  | 2.770371000  | -1.187341000 | -0.364662000 |
| C  | 3.355498000  | 2.382098000  | 0.944256000  |
| C  | 3.355498000  | -2.382098000 | -0.944256000 |
| C  | 3.433360000  | 0.000000000  | 0.000000000  |
| C  | 4.921250000  | 0.000000000  | 0.000000000  |
| C  | 5.626987000  | 0.754739000  | -0.944204000 |
| C  | 5.626987000  | -0.754739000 | 0.944204000  |
| C  | 7.020163000  | 0.749235000  | -0.949468000 |
| C  | 7.020163000  | -0.749235000 | 0.949468000  |
| C  | 7.720176000  | 0.000000000  | 0.000000000  |
| C  | -0.749235000 | 7.020163000  | 0.949468000  |
| C  | -0.749235000 | -7.020163000 | -0.949468000 |
| C  | -0.754739000 | 5.626987000  | 0.944204000  |
| C  | -0.754739000 | -5.626987000 | -0.944204000 |

|    |              |              |              |
|----|--------------|--------------|--------------|
| C  | -1.187341000 | 2.770371000  | -0.364662000 |
| C  | -1.187341000 | -2.770371000 | 0.364662000  |
| C  | -2.382098000 | 3.355498000  | -0.944256000 |
| C  | -2.382098000 | -3.355498000 | 0.944256000  |
| C  | -2.770371000 | 1.187341000  | -0.364662000 |
| C  | -2.770371000 | -1.187341000 | 0.364662000  |
| C  | -3.355498000 | 2.382098000  | -0.944256000 |
| C  | -3.355498000 | -2.382098000 | 0.944256000  |
| C  | -3.433360000 | 0.000000000  | 0.000000000  |
| C  | -4.921250000 | 0.000000000  | 0.000000000  |
| C  | -5.626987000 | 0.754739000  | 0.944204000  |
| C  | -5.626987000 | -0.754739000 | -0.944204000 |
| C  | -7.020163000 | 0.749235000  | 0.949468000  |
| C  | -7.020163000 | -0.749235000 | -0.949468000 |
| C  | -7.720176000 | 0.000000000  | 0.000000000  |
| C1 | 2.586312000  | 4.906191000  | 1.652611000  |
| C1 | 2.586312000  | -4.906191000 | -1.652611000 |
| C1 | 4.906191000  | 2.586312000  | 1.652611000  |
| C1 | 4.906191000  | -2.586312000 | -1.652611000 |
| C1 | -2.586312000 | 4.906191000  | -1.652611000 |
| C1 | -2.586312000 | -4.906191000 | 1.652611000  |
| C1 | -4.906191000 | 2.586312000  | -1.652611000 |
| C1 | -4.906191000 | -2.586312000 | 1.652611000  |
| H  | 0.000000000  | 8.809737000  | 0.000000000  |
| H  | 0.000000000  | -8.809737000 | 0.000000000  |
| H  | 1.332974000  | 7.561109000  | -1.692872000 |
| H  | 1.332974000  | -7.561109000 | 1.692872000  |
| H  | 1.341420000  | 5.072980000  | -1.676191000 |
| H  | 1.341420000  | -5.072980000 | 1.676191000  |
| H  | 5.072980000  | 1.341420000  | -1.676191000 |
| H  | 5.072980000  | -1.341420000 | 1.676191000  |
| H  | 7.561109000  | 1.332974000  | -1.692872000 |
| H  | 7.561109000  | -1.332974000 | 1.692872000  |
| H  | 8.809737000  | 0.000000000  | 0.000000000  |
| H  | -1.332974000 | 7.561109000  | 1.692872000  |
| H  | -1.332974000 | -7.561109000 | -1.692872000 |
| H  | -1.341420000 | 5.072980000  | 1.676191000  |
| H  | -1.341420000 | -5.072980000 | -1.676191000 |
| H  | -5.072980000 | 1.341420000  | 1.676191000  |
| H  | -5.072980000 | -1.341420000 | -1.676191000 |
| H  | -7.561109000 | 1.332974000  | 1.692872000  |
| H  | -7.561109000 | -1.332974000 | -1.692872000 |
| H  | -8.809737000 | 0.000000000  | 0.000000000  |
| N  | 1.438154000  | 1.438154000  | 0.112702000  |
| N  | 1.438154000  | -1.438154000 | -0.112702000 |
| N  | -1.438154000 | 1.438154000  | -0.112702000 |
| N  | -1.438154000 | -1.438154000 | 0.112702000  |

30. Zn[Cl<sub>8</sub>TPP]; S = 0 (ruffled)

|    |              |              |              |
|----|--------------|--------------|--------------|
| Zn | 0.000000000  | 0.000000000  | 0.000000000  |
| C  | 0.666539000  | 4.255953000  | -0.163704000 |
| C  | 0.666539000  | -4.255953000 | 0.163704000  |
| C  | 1.101555000  | 2.869062000  | -0.215109000 |
| C  | 1.101555000  | -2.869062000 | 0.215109000  |
| C  | 2.428891000  | 2.428891000  | -0.361584000 |
| C  | 2.428891000  | -2.428891000 | 0.361584000  |
| C  | 2.869062000  | 1.101555000  | -0.215109000 |
| C  | 2.869062000  | -1.101555000 | 0.215109000  |
| C  | 3.470755000  | 3.470755000  | -0.610131000 |
| C  | 3.470755000  | -3.470755000 | 0.610131000  |
| C  | 3.816796000  | 3.816796000  | -1.918504000 |
| C  | 3.816796000  | -3.816796000 | 1.918504000  |
| C  | 4.104252000  | 4.104252000  | 0.464110000  |
| C  | 4.104252000  | -4.104252000 | -0.464110000 |
| C  | 4.255953000  | 0.666539000  | -0.163704000 |
| C  | 4.255953000  | -0.666539000 | 0.163704000  |
| C  | 4.788849000  | 4.788849000  | -2.152257000 |
| C  | 4.788849000  | -4.788849000 | 2.152257000  |
| C  | 5.075016000  | 5.075016000  | 0.232411000  |
| C  | 5.075016000  | -5.075016000 | -0.232411000 |
| C  | 5.419634000  | 5.419634000  | -1.077387000 |
| C  | 5.419634000  | -5.419634000 | 1.077387000  |
| C  | -0.666539000 | 4.255953000  | 0.163704000  |
| C  | -0.666539000 | -4.255953000 | -0.163704000 |
| C  | -1.101555000 | 2.869062000  | 0.215109000  |
| C  | -1.101555000 | -2.869062000 | -0.215109000 |
| C  | -2.428891000 | 2.428891000  | 0.361584000  |
| C  | -2.428891000 | -2.428891000 | -0.361584000 |
| C  | -2.869062000 | 1.101555000  | 0.215109000  |
| C  | -2.869062000 | -1.101555000 | -0.215109000 |
| C  | -3.470755000 | 3.470755000  | 0.610131000  |
| C  | -3.470755000 | -3.470755000 | -0.610131000 |
| C  | -3.816796000 | 3.816796000  | 1.918504000  |
| C  | -3.816796000 | -3.816796000 | -1.918504000 |
| C  | -4.104252000 | 4.104252000  | -0.464110000 |
| C  | -4.104252000 | -4.104252000 | 0.464110000  |
| C  | -4.255953000 | 0.666539000  | 0.163704000  |
| C  | -4.255953000 | -0.666539000 | -0.163704000 |
| C  | -4.788849000 | 4.788849000  | 2.152257000  |
| C  | -4.788849000 | -4.788849000 | -2.152257000 |
| C  | -5.075016000 | 5.075016000  | -0.232411000 |
| C  | -5.075016000 | -5.075016000 | 0.232411000  |
| C  | -5.419634000 | 5.419634000  | 1.077387000  |
| C  | -5.419634000 | -5.419634000 | -1.077387000 |
| Cl | 1.525389000  | 5.717078000  | -0.445801000 |
| Cl | 1.525389000  | -5.717078000 | 0.445801000  |
| Cl | 5.717078000  | 1.525389000  | -0.445801000 |

|    |              |              |              |
|----|--------------|--------------|--------------|
| C1 | 5.717078000  | -1.525389000 | 0.445801000  |
| C1 | -1.525389000 | 5.717078000  | 0.445801000  |
| C1 | -1.525389000 | -5.717078000 | -0.445801000 |
| C1 | -5.717078000 | 1.525389000  | 0.445801000  |
| C1 | -5.717078000 | -1.525389000 | -0.445801000 |
| H  | 3.320031000  | 3.320031000  | -2.751129000 |
| H  | 3.320031000  | -3.320031000 | 2.751129000  |
| H  | 3.828529000  | 3.828529000  | 1.481239000  |
| H  | 3.828529000  | -3.828529000 | -1.481239000 |
| H  | 5.054162000  | 5.054162000  | -3.174660000 |
| H  | 5.054162000  | -5.054162000 | 3.174660000  |
| H  | 5.563862000  | 5.563862000  | 1.073834000  |
| H  | 5.563862000  | -5.563862000 | -1.073834000 |
| H  | 6.179197000  | 6.179197000  | -1.260044000 |
| H  | 6.179197000  | -6.179197000 | 1.260044000  |
| H  | -3.320031000 | 3.320031000  | 2.751129000  |
| H  | -3.320031000 | -3.320031000 | -2.751129000 |
| H  | -3.828529000 | 3.828529000  | -1.481239000 |
| H  | -3.828529000 | -3.828529000 | 1.481239000  |
| H  | -5.054162000 | 5.054162000  | 3.174660000  |
| H  | -5.054162000 | -5.054162000 | -3.174660000 |
| H  | -5.563862000 | 5.563862000  | -1.073834000 |
| H  | -5.563862000 | -5.563862000 | 1.073834000  |
| H  | -6.179197000 | 6.179197000  | 1.260044000  |
| H  | -6.179197000 | -6.179197000 | -1.260044000 |
| N  | 0.000000000  | 2.059916000  | 0.000000000  |
| N  | 0.000000000  | -2.059916000 | 0.000000000  |
| N  | 2.059916000  | 0.000000000  | 0.000000000  |
| N  | -2.059916000 | 0.000000000  | 0.000000000  |

**31. Cu[(CF<sub>3</sub>)<sub>8</sub>TPP]; S = ½ (saddled)**

|   |             |              |              |
|---|-------------|--------------|--------------|
| C | 0.000000000 | 0.000000000  | 3.387892000  |
| C | 0.000000000 | 0.000000000  | 4.856074000  |
| C | 0.000000000 | 0.000000000  | 7.657429000  |
| C | 0.000000000 | 0.000000000  | -3.387892000 |
| C | 0.000000000 | 0.000000000  | -4.856074000 |
| C | 0.000000000 | 0.000000000  | -7.657429000 |
| C | 1.084283000 | 0.576831000  | -2.670281000 |
| C | 1.084283000 | -0.576831000 | 2.670281000  |
| C | 1.116974000 | 0.465525000  | 6.958373000  |
| C | 1.116974000 | -0.465525000 | -6.958373000 |
| C | 1.122546000 | 0.454355000  | 5.567737000  |
| C | 1.122546000 | -0.454355000 | -5.567737000 |
| C | 2.057560000 | 2.426538000  | -4.299652000 |
| C | 2.057560000 | -2.426538000 | 4.299652000  |
| C | 2.079493000 | 1.559696000  | -3.058854000 |
| C | 2.079493000 | -1.559696000 | 3.058854000  |
| C | 2.619052000 | 0.620116000  | -1.056197000 |
| C | 2.619052000 | -0.620116000 | 1.056197000  |

|    |              |              |              |
|----|--------------|--------------|--------------|
| C  | 3.016998000  | 1.611657000  | -2.031300000 |
| C  | 3.016998000  | -1.611657000 | 2.031300000  |
| C  | 3.340853000  | 0.000000000  | 0.000000000  |
| C  | 4.054929000  | 2.699303000  | -1.833002000 |
| C  | 4.054929000  | -2.699303000 | 1.833002000  |
| C  | 4.803684000  | 0.000000000  | 0.000000000  |
| C  | 5.519179000  | 0.214893000  | 1.193052000  |
| C  | 5.519179000  | -0.214893000 | -1.193052000 |
| C  | 6.909296000  | 0.218120000  | 1.190596000  |
| C  | 6.909296000  | -0.218120000 | -1.190596000 |
| C  | 7.609327000  | 0.000000000  | 0.000000000  |
| C  | -1.084283000 | 0.576831000  | 2.670281000  |
| C  | -1.084283000 | -0.576831000 | -2.670281000 |
| C  | -1.116974000 | 0.465525000  | -6.958373000 |
| C  | -1.116974000 | -0.465525000 | 6.958373000  |
| C  | -1.122546000 | 0.454355000  | -5.567737000 |
| C  | -1.122546000 | -0.454355000 | 5.567737000  |
| C  | -2.057560000 | 2.426538000  | 4.299652000  |
| C  | -2.057560000 | -2.426538000 | -4.299652000 |
| C  | -2.079493000 | 1.559696000  | 3.058854000  |
| C  | -2.079493000 | -1.559696000 | -3.058854000 |
| C  | -2.619052000 | 0.620116000  | 1.056197000  |
| C  | -2.619052000 | -0.620116000 | -1.056197000 |
| C  | -3.016998000 | 1.611657000  | 2.031300000  |
| C  | -3.016998000 | -1.611657000 | -2.031300000 |
| C  | -3.340853000 | 0.000000000  | 0.000000000  |
| C  | -4.054929000 | 2.699303000  | 1.833002000  |
| C  | -4.054929000 | -2.699303000 | -1.833002000 |
| C  | -4.803684000 | 0.000000000  | 0.000000000  |
| C  | -5.519179000 | 0.214893000  | -1.193052000 |
| C  | -5.519179000 | -0.214893000 | 1.193052000  |
| C  | -6.909296000 | 0.218120000  | -1.190596000 |
| C  | -6.909296000 | -0.218120000 | 1.190596000  |
| C  | -7.609327000 | 0.000000000  | 0.000000000  |
| Cu | 0.000000000  | 0.000000000  | 0.000000000  |
| F  | 0.796569000  | 2.648994000  | -4.742306000 |
| F  | 0.796569000  | -2.648994000 | 4.742306000  |
| F  | 2.610773000  | 3.646766000  | -4.103636000 |
| F  | 2.610773000  | -3.646766000 | 4.103636000  |
| F  | 2.765508000  | 1.851745000  | -5.317332000 |
| F  | 2.765508000  | -1.851745000 | 5.317332000  |
| F  | 3.456142000  | 3.917696000  | -1.725492000 |
| F  | 3.456142000  | -3.917696000 | 1.725492000  |
| F  | 4.778738000  | 2.558314000  | -0.700797000 |
| F  | 4.778738000  | -2.558314000 | 0.700797000  |
| F  | 4.933428000  | 2.759222000  | -2.873040000 |
| F  | 4.933428000  | -2.759222000 | 2.873040000  |
| F  | -0.796569000 | 2.648994000  | 4.742306000  |
| F  | -0.796569000 | -2.648994000 | -4.742306000 |
| F  | -2.610773000 | 3.646766000  | 4.103636000  |
| F  | -2.610773000 | -3.646766000 | -4.103636000 |



|   |              |              |              |
|---|--------------|--------------|--------------|
| F | -2.765508000 | 1.851745000  | 5.317332000  |
| F | -2.765508000 | -1.851745000 | -5.317332000 |
| F | -3.456142000 | 3.917696000  | 1.725492000  |
| F | -3.456142000 | -3.917696000 | -1.725492000 |
| F | -4.778738000 | 2.558314000  | 0.700797000  |
| F | -4.778738000 | -2.558314000 | -0.700797000 |
| F | -4.933428000 | 2.759222000  | 2.873040000  |
| F | -4.933428000 | -2.759222000 | -2.873040000 |
| H | 0.000000000  | 0.000000000  | 8.746847000  |
| H | 0.000000000  | 0.000000000  | -8.746847000 |
| H | 1.986620000  | 0.834994000  | 7.498890000  |
| H | 1.986620000  | -0.834994000 | -7.498890000 |
| H | 1.987411000  | 0.820806000  | 5.017549000  |
| H | 1.987411000  | -0.820806000 | -5.017549000 |
| H | 4.972684000  | 0.406358000  | 2.115364000  |
| H | 4.972684000  | -0.406358000 | -2.115364000 |
| H | 7.450186000  | 0.397512000  | 2.118201000  |
| H | 7.450186000  | -0.397512000 | -2.118201000 |
| H | 8.698621000  | 0.000000000  | 0.000000000  |
| H | -1.986620000 | 0.834994000  | -7.498890000 |
| H | -1.986620000 | -0.834994000 | 7.498890000  |
| H | -1.987411000 | 0.820806000  | -5.017549000 |
| H | -1.987411000 | -0.820806000 | 5.017549000  |
| H | -4.972684000 | 0.406358000  | -2.115364000 |
| H | -4.972684000 | -0.406358000 | 2.115364000  |
| H | -7.450186000 | 0.397512000  | -2.118201000 |
| H | -7.450186000 | -0.397512000 | 2.118201000  |
| H | -8.698621000 | 0.000000000  | 0.000000000  |
| N | 1.390072000  | 0.124441000  | -1.410669000 |
| N | 1.390072000  | -0.124441000 | 1.410669000  |
| N | -1.390072000 | 0.124441000  | 1.410669000  |
| N | -1.390072000 | -0.124441000 | -1.410669000 |

### 32. Cu[(CF<sub>3</sub>)<sub>8</sub>TPP]; S = ½ (ruffled)

|    |             |              |              |
|----|-------------|--------------|--------------|
| Cu | 0.000000000 | 0.000000000  | 0.000000000  |
| C  | 0.519799000 | 4.086691000  | 0.457870000  |
| C  | 0.519799000 | -4.086691000 | -0.457870000 |
| C  | 0.940463000 | 2.695455000  | 0.622886000  |
| C  | 0.940463000 | -2.695455000 | -0.622886000 |
| C  | 0.949211000 | 5.323037000  | 1.230133000  |
| C  | 0.949211000 | -5.323037000 | -1.230133000 |
| C  | 2.193635000 | 2.193635000  | 1.071039000  |
| C  | 2.193635000 | -2.193635000 | -1.071039000 |
| C  | 2.695455000 | 0.940463000  | 0.622886000  |
| C  | 2.695455000 | -0.940463000 | -0.622886000 |
| C  | 2.926522000 | 2.926522000  | 3.324977000  |
| C  | 2.926522000 | -2.926522000 | -3.324977000 |
| C  | 3.051419000 | 3.051419000  | 1.934105000  |
| C  | 3.051419000 | -3.051419000 | -1.934105000 |

|   |              |              |              |
|---|--------------|--------------|--------------|
| C | 3.707816000  | 3.707816000  | 4.170292000  |
| C | 3.707816000  | -3.707816000 | -4.170292000 |
| C | 3.962774000  | 3.962774000  | 1.401759000  |
| C | 3.962774000  | -3.962774000 | -1.401759000 |
| C | 4.086691000  | 0.519799000  | 0.457870000  |
| C | 4.086691000  | -0.519799000 | -0.457870000 |
| C | 4.620640000  | 4.620640000  | 3.632794000  |
| C | 4.620640000  | -4.620640000 | -3.632794000 |
| C | 4.746359000  | 4.746359000  | 2.250236000  |
| C | 4.746359000  | -4.746359000 | -2.250236000 |
| C | 5.323037000  | 0.949211000  | 1.230133000  |
| C | 5.323037000  | -0.949211000 | -1.230133000 |
| C | -0.519799000 | 4.086691000  | -0.457870000 |
| C | -0.519799000 | -4.086691000 | 0.457870000  |
| C | -0.940463000 | 2.695455000  | -0.622886000 |
| C | -0.940463000 | -2.695455000 | 0.622886000  |
| C | -0.949211000 | 5.323037000  | -1.230133000 |
| C | -0.949211000 | -5.323037000 | 1.230133000  |
| C | -2.193635000 | 2.193635000  | -1.071039000 |
| C | -2.193635000 | -2.193635000 | 1.071039000  |
| C | -2.695455000 | 0.940463000  | -0.622886000 |
| C | -2.695455000 | -0.940463000 | 0.622886000  |
| C | -2.926522000 | 2.926522000  | -3.324977000 |
| C | -2.926522000 | -2.926522000 | 3.324977000  |
| C | -3.051419000 | 3.051419000  | -1.934105000 |
| C | -3.051419000 | -3.051419000 | 1.934105000  |
| C | -3.707816000 | 3.707816000  | -4.170292000 |
| C | -3.707816000 | -3.707816000 | 4.170292000  |
| C | -3.962774000 | 3.962774000  | -1.401759000 |
| C | -3.962774000 | -3.962774000 | 1.401759000  |
| C | -4.086691000 | 0.519799000  | -0.457870000 |
| C | -4.086691000 | -0.519799000 | 0.457870000  |
| C | -4.620640000 | 4.620640000  | -3.632794000 |
| C | -4.620640000 | -4.620640000 | 3.632794000  |
| C | -4.746359000 | 4.746359000  | -2.250236000 |
| C | -4.746359000 | -4.746359000 | 2.250236000  |
| C | -5.323037000 | 0.949211000  | -1.230133000 |
| C | -5.323037000 | -0.949211000 | 1.230133000  |
| F | 0.060309000  | 6.237307000  | -1.276978000 |
| F | 0.060309000  | -6.237307000 | 1.276978000  |
| F | 1.215735000  | 5.024100000  | 2.522220000  |
| F | 1.215735000  | -5.024100000 | -2.522220000 |
| F | 2.031538000  | 5.952135000  | 0.706808000  |
| F | 2.031538000  | -5.952135000 | -0.706808000 |
| F | 5.024100000  | 1.215735000  | 2.522220000  |
| F | 5.024100000  | -1.215735000 | -2.522220000 |
| F | 5.952135000  | 2.031538000  | 0.706808000  |
| F | 5.952135000  | -2.031538000 | -0.706808000 |
| F | 6.237307000  | 0.060309000  | -1.276978000 |
| F | 6.237307000  | -0.060309000 | 1.276978000  |
| F | -0.060309000 | 6.237307000  | 1.276978000  |

|   |              |              |              |
|---|--------------|--------------|--------------|
| F | -0.060309000 | -6.237307000 | -1.276978000 |
| F | -1.215735000 | 5.024100000  | -2.522220000 |
| F | -1.215735000 | -5.024100000 | 2.522220000  |
| F | -2.031538000 | 5.952135000  | -0.706808000 |
| F | -2.031538000 | -5.952135000 | 0.706808000  |
| F | -5.024100000 | 1.215735000  | -2.522220000 |
| F | -5.024100000 | -1.215735000 | 2.522220000  |
| F | -5.952135000 | 2.031538000  | -0.706808000 |
| F | -5.952135000 | -2.031538000 | 0.706808000  |
| F | -6.237307000 | 0.060309000  | 1.276978000  |
| F | -6.237307000 | -0.060309000 | -1.276978000 |
| H | 2.213126000  | 2.213126000  | 3.735478000  |
| H | 2.213126000  | -2.213126000 | -3.735478000 |
| H | 3.605409000  | 3.605409000  | 5.249455000  |
| H | 3.605409000  | -3.605409000 | -5.249455000 |
| H | 4.057554000  | 4.057554000  | 0.322057000  |
| H | 4.057554000  | -4.057554000 | -0.322057000 |
| H | 5.232735000  | 5.232735000  | 4.294220000  |
| H | 5.232735000  | -5.232735000 | -4.294220000 |
| H | 5.454982000  | 5.454982000  | 1.825238000  |
| H | 5.454982000  | -5.454982000 | -1.825238000 |
| H | -2.213126000 | 2.213126000  | -3.735478000 |
| H | -2.213126000 | -2.213126000 | 3.735478000  |
| H | -3.605409000 | 3.605409000  | -5.249455000 |
| H | -3.605409000 | -3.605409000 | 5.249455000  |
| H | -4.057554000 | 4.057554000  | -0.322057000 |
| H | -4.057554000 | -4.057554000 | 0.322057000  |
| H | -5.232735000 | 5.232735000  | -4.294220000 |
| H | -5.232735000 | -5.232735000 | 4.294220000  |
| H | -5.454982000 | 5.454982000  | -1.825238000 |
| H | -5.454982000 | -5.454982000 | 1.825238000  |
| N | 0.000000000  | 1.918601000  | 0.000000000  |
| N | 0.000000000  | -1.918601000 | 0.000000000  |
| N | 1.918601000  | 0.000000000  | 0.000000000  |
| N | -1.918601000 | 0.000000000  | 0.000000000  |

### 33. Ni[(CF<sub>3</sub>)<sub>8</sub>TPP]; S = 0 (saddled)

|    |             |              |              |
|----|-------------|--------------|--------------|
| Ni | 0.000000000 | 0.000000000  | 0.000000000  |
| C  | 0.000000000 | 0.000000000  | 3.345188000  |
| C  | 0.000000000 | 0.000000000  | 4.818864000  |
| C  | 0.000000000 | 0.000000000  | 7.618427000  |
| C  | 0.000000000 | 0.000000000  | -3.345188000 |
| C  | 0.000000000 | 0.000000000  | -4.818864000 |
| C  | 0.000000000 | 0.000000000  | -7.618427000 |
| C  | 1.037367000 | 0.627808000  | -2.620187000 |
| C  | 1.037367000 | -0.627808000 | 2.620187000  |
| C  | 1.102127000 | 0.498636000  | 6.919439000  |
| C  | 1.102127000 | -0.498636000 | -6.919439000 |
| C  | 1.107701000 | 0.487551000  | 5.527981000  |

|   |              |              |              |
|---|--------------|--------------|--------------|
| C | 1.107701000  | -0.487551000 | -5.527981000 |
| C | 2.047798000  | 2.424128000  | -4.279879000 |
| C | 2.047798000  | -2.424128000 | 4.279879000  |
| C | 2.050070000  | 1.586345000  | -3.019827000 |
| C | 2.050070000  | -1.586345000 | 3.019827000  |
| C | 2.574017000  | 0.674699000  | -1.002388000 |
| C | 2.574017000  | -0.674699000 | 1.002388000  |
| C | 2.983926000  | 1.642901000  | -1.992788000 |
| C | 2.983926000  | -1.642901000 | 1.992788000  |
| C | 3.304423000  | 0.000000000  | 0.000000000  |
| C | 4.045303000  | 2.709253000  | -1.805529000 |
| C | 4.045303000  | -2.709253000 | 1.805529000  |
| C | 4.772216000  | 0.000000000  | 0.000000000  |
| C | 5.485026000  | 0.207548000  | 1.193562000  |
| C | 5.485026000  | -0.207548000 | -1.193562000 |
| C | 6.875916000  | 0.210718000  | 1.191493000  |
| C | 6.875916000  | -0.210718000 | -1.191493000 |
| C | 7.575882000  | 0.000000000  | 0.000000000  |
| C | -1.037367000 | 0.627808000  | 2.620187000  |
| C | -1.037367000 | -0.627808000 | -2.620187000 |
| C | -1.102127000 | 0.498636000  | -6.919439000 |
| C | -1.102127000 | -0.498636000 | 6.919439000  |
| C | -1.107701000 | 0.487551000  | -5.527981000 |
| C | -1.107701000 | -0.487551000 | 5.527981000  |
| C | -2.047798000 | 2.424128000  | 4.279879000  |
| C | -2.047798000 | -2.424128000 | -4.279879000 |
| C | -2.050070000 | 1.586345000  | 3.019827000  |
| C | -2.050070000 | -1.586345000 | -3.019827000 |
| C | -2.574017000 | 0.674699000  | 1.002388000  |
| C | -2.574017000 | -0.674699000 | -1.002388000 |
| C | -2.983926000 | 1.642901000  | 1.992788000  |
| C | -2.983926000 | -1.642901000 | -1.992788000 |
| C | -3.304423000 | 0.000000000  | 0.000000000  |
| C | -4.045303000 | 2.709253000  | 1.805529000  |
| C | -4.045303000 | -2.709253000 | -1.805529000 |
| C | -4.772216000 | 0.000000000  | 0.000000000  |
| C | -5.485026000 | 0.207548000  | -1.193562000 |
| C | -5.485026000 | -0.207548000 | 1.193562000  |
| C | -6.875916000 | 0.210718000  | -1.191493000 |
| C | -6.875916000 | -0.210718000 | 1.191493000  |
| C | -7.575882000 | 0.000000000  | 0.000000000  |
| F | 0.791892000  | 2.666001000  | -4.726276000 |
| F | 0.791892000  | -2.666001000 | 4.726276000  |
| F | 2.629625000  | 3.634591000  | -4.106408000 |
| F | 2.629625000  | -3.634591000 | 4.106408000  |
| F | 2.742610000  | 1.814264000  | -5.285074000 |
| F | 2.742610000  | -1.814264000 | 5.285074000  |
| F | 3.473452000  | 3.942945000  | -1.732797000 |
| F | 3.473452000  | -3.942945000 | 1.732797000  |
| F | 4.747498000  | 2.574432000  | -0.659240000 |
| F | 4.747498000  | -2.574432000 | 0.659240000  |

|   |              |              |              |
|---|--------------|--------------|--------------|
| F | 4.938703000  | 2.727282000  | -2.833779000 |
| F | 4.938703000  | -2.727282000 | 2.833779000  |
| F | -0.791892000 | 2.666001000  | 4.726276000  |
| F | -0.791892000 | -2.666001000 | -4.726276000 |
| F | -2.629625000 | 3.634591000  | 4.106408000  |
| F | -2.629625000 | -3.634591000 | -4.106408000 |
| F | -2.742610000 | 1.814264000  | 5.285074000  |
| F | -2.742610000 | -1.814264000 | -5.285074000 |
| F | -3.473452000 | 3.942945000  | 1.732797000  |
| F | -3.473452000 | -3.942945000 | -1.732797000 |
| F | -4.747498000 | 2.574432000  | 0.659240000  |
| F | -4.747498000 | -2.574432000 | -0.659240000 |
| F | -4.938703000 | 2.727282000  | 2.833779000  |
| F | -4.938703000 | -2.727282000 | -2.833779000 |
| H | 0.000000000  | 0.000000000  | 8.707867000  |
| H | 0.000000000  | 0.000000000  | -8.707867000 |
| H | 1.961135000  | 0.892869000  | 7.459532000  |
| H | 1.961135000  | -0.892869000 | -7.459532000 |
| H | 1.962663000  | 0.876150000  | 4.977326000  |
| H | 1.962663000  | -0.876150000 | -4.977326000 |
| H | 4.937934000  | 0.389137000  | 2.117612000  |
| H | 4.937934000  | -0.389137000 | -2.117612000 |
| H | 7.416476000  | 0.382942000  | 2.120633000  |
| H | 7.416476000  | -0.382942000 | -2.120633000 |
| H | 8.665192000  | 0.000000000  | 0.000000000  |
| H | -1.961135000 | 0.892869000  | -7.459532000 |
| H | -1.961135000 | -0.892869000 | 7.459532000  |
| H | -1.962663000 | 0.876150000  | -4.977326000 |
| H | -1.962663000 | -0.876150000 | 4.977326000  |
| H | -4.937934000 | 0.389137000  | -2.117612000 |
| H | -4.937934000 | -0.389137000 | 2.117612000  |
| H | -7.416476000 | 0.382942000  | -2.120633000 |
| H | -7.416476000 | -0.382942000 | 2.120633000  |
| H | -8.665192000 | 0.000000000  | 0.000000000  |
| N | 1.311788000  | 0.222816000  | -1.328768000 |
| N | 1.311788000  | -0.222816000 | 1.328768000  |
| N | -1.311788000 | 0.222816000  | 1.328768000  |
| N | -1.311788000 | -0.222816000 | -1.328768000 |

**34. Ni[(CF<sub>3</sub>)<sub>8</sub>TPP]; S = 0 (ruffled)**

|    |             |              |              |
|----|-------------|--------------|--------------|
| Ni | 0.000000000 | 0.000000000  | 0.000000000  |
| C  | 0.491632000 | 4.014967000  | 0.486852000  |
| C  | 0.491632000 | -4.014967000 | -0.486852000 |
| C  | 0.895544000 | 5.246986000  | 1.275639000  |
| C  | 0.895544000 | -5.246986000 | -1.275639000 |
| C  | 0.901334000 | 2.628662000  | 0.677052000  |
| C  | 0.901334000 | -2.628662000 | -0.677052000 |
| C  | 2.134229000 | 2.134229000  | 1.166667000  |
| C  | 2.134229000 | -2.134229000 | -1.166667000 |

|   |              |              |              |
|---|--------------|--------------|--------------|
| C | 2.628662000  | 0.901334000  | 0.677052000  |
| C | 2.628662000  | -0.901334000 | -0.677052000 |
| C | 2.797150000  | 2.797150000  | 3.461156000  |
| C | 2.797150000  | -2.797150000 | -3.461156000 |
| C | 2.964593000  | 2.964593000  | 2.079581000  |
| C | 2.964593000  | -2.964593000 | -2.079581000 |
| C | 3.552356000  | 3.552356000  | 4.353149000  |
| C | 3.552356000  | -3.552356000 | -4.353149000 |
| C | 3.891337000  | 3.891337000  | 1.602914000  |
| C | 3.891337000  | -3.891337000 | -1.602914000 |
| C | 4.014967000  | 0.491632000  | 0.486852000  |
| C | 4.014967000  | -0.491632000 | -0.486852000 |
| C | 4.480613000  | 4.480613000  | 3.871772000  |
| C | 4.480613000  | -4.480613000 | -3.871772000 |
| C | 4.648193000  | 4.648193000  | 2.497954000  |
| C | 4.648193000  | -4.648193000 | -2.497954000 |
| C | 5.246986000  | 0.895544000  | 1.275639000  |
| C | 5.246986000  | -0.895544000 | -1.275639000 |
| C | -0.491632000 | 4.014967000  | -0.486852000 |
| C | -0.491632000 | -4.014967000 | 0.486852000  |
| C | -0.895544000 | 5.246986000  | -1.275639000 |
| C | -0.895544000 | -5.246986000 | 1.275639000  |
| C | -0.901334000 | 2.628662000  | -0.677052000 |
| C | -0.901334000 | -2.628662000 | 0.677052000  |
| C | -2.134229000 | 2.134229000  | -1.166667000 |
| C | -2.134229000 | -2.134229000 | 1.166667000  |
| C | -2.628662000 | 0.901334000  | -0.677052000 |
| C | -2.628662000 | -0.901334000 | 0.677052000  |
| C | -2.797150000 | 2.797150000  | -3.461156000 |
| C | -2.797150000 | -2.797150000 | 3.461156000  |
| C | -2.964593000 | 2.964593000  | -2.079581000 |
| C | -2.964593000 | -2.964593000 | 2.079581000  |
| C | -3.552356000 | 3.552356000  | -4.353149000 |
| C | -3.552356000 | -3.552356000 | 4.353149000  |
| C | -3.891337000 | 3.891337000  | -1.602914000 |
| C | -3.891337000 | -3.891337000 | 1.602914000  |
| C | -4.014967000 | 0.491632000  | -0.486852000 |
| C | -4.014967000 | -0.491632000 | 0.486852000  |
| C | -4.480613000 | 4.480613000  | -3.871772000 |
| C | -4.480613000 | -4.480613000 | 3.871772000  |
| C | -4.648193000 | 4.648193000  | -2.497954000 |
| C | -4.648193000 | -4.648193000 | 2.497954000  |
| C | -5.246986000 | 0.895544000  | -1.275639000 |
| C | -5.246986000 | -0.895544000 | 1.275639000  |
| F | 0.111115000  | 6.164810000  | -1.281402000 |
| F | 0.111115000  | -6.164810000 | 1.281402000  |
| F | 1.114171000  | 4.946650000  | 2.576424000  |
| F | 1.114171000  | -4.946650000 | -2.576424000 |
| F | 1.999810000  | 5.871962000  | 0.792769000  |
| F | 1.999810000  | -5.871962000 | -0.792769000 |
| F | 4.946650000  | 1.114171000  | 2.576424000  |

|   |              |              |              |
|---|--------------|--------------|--------------|
| F | 4.946650000  | -1.114171000 | -2.576424000 |
| F | 5.871962000  | 1.999810000  | 0.792769000  |
| F | 5.871962000  | -1.999810000 | -0.792769000 |
| F | 6.164810000  | 0.111115000  | -1.281402000 |
| F | 6.164810000  | -0.111115000 | 1.281402000  |
| F | -0.111115000 | 6.164810000  | 1.281402000  |
| F | -0.111115000 | -6.164810000 | -1.281402000 |
| F | -1.114171000 | 4.946650000  | -2.576424000 |
| F | -1.114171000 | -4.946650000 | 2.576424000  |
| F | -1.999810000 | 5.871962000  | -0.792769000 |
| F | -1.999810000 | -5.871962000 | 0.792769000  |
| F | -4.946650000 | 1.114171000  | -2.576424000 |
| F | -4.946650000 | -1.114171000 | 2.576424000  |
| F | -5.871962000 | 1.999810000  | -0.792769000 |
| F | -5.871962000 | -1.999810000 | 0.792769000  |
| F | -6.164810000 | 0.111115000  | 1.281402000  |
| F | -6.164810000 | -0.111115000 | -1.281402000 |
| H | 2.071905000  | 2.071905000  | 3.827648000  |
| H | 2.071905000  | -2.071905000 | -3.827648000 |
| H | 3.417255000  | 3.417255000  | 5.425084000  |
| H | 3.417255000  | -3.417255000 | -5.425084000 |
| H | 4.018767000  | 4.018767000  | 0.530245000  |
| H | 4.018767000  | -4.018767000 | -0.530245000 |
| H | 5.072015000  | 5.072015000  | 4.569795000  |
| H | 5.072015000  | -5.072015000 | -4.569795000 |
| H | 5.369026000  | 5.369026000  | 2.116389000  |
| H | 5.369026000  | -5.369026000 | -2.116389000 |
| H | -2.071905000 | 2.071905000  | -3.827648000 |
| H | -2.071905000 | -2.071905000 | 3.827648000  |
| H | -3.417255000 | 3.417255000  | -5.425084000 |
| H | -3.417255000 | -3.417255000 | 5.425084000  |
| H | -4.018767000 | 4.018767000  | -0.530245000 |
| H | -4.018767000 | -4.018767000 | 0.530245000  |
| H | -5.072015000 | 5.072015000  | -4.569795000 |
| H | -5.072015000 | -5.072015000 | 4.569795000  |
| H | -5.369026000 | 5.369026000  | -2.116389000 |
| H | -5.369026000 | -5.369026000 | 2.116389000  |
| N | 0.000000000  | 1.842268000  | 0.000000000  |
| N | 0.000000000  | -1.842268000 | 0.000000000  |
| N | 1.842268000  | 0.000000000  | 0.000000000  |
| N | -1.842268000 | 0.000000000  | 0.000000000  |

**35. Pd[(CF<sub>3</sub>)<sub>8</sub>TPP]; S = 0 (saddled)**

|    |             |             |              |
|----|-------------|-------------|--------------|
| Pd | 0.000000000 | 0.000000000 | 0.000000000  |
| C  | 0.000000000 | 0.000000000 | 3.406456000  |
| C  | 0.000000000 | 0.000000000 | 4.882611000  |
| C  | 0.000000000 | 0.000000000 | 7.681320000  |
| C  | 0.000000000 | 0.000000000 | -3.406456000 |
| C  | 0.000000000 | 0.000000000 | -4.882611000 |

|   |              |              |              |
|---|--------------|--------------|--------------|
| C | 0.000000000  | 0.000000000  | -7.681320000 |
| C | 1.030861000  | 0.633318000  | 6.982766000  |
| C | 1.030861000  | -0.633318000 | -6.982766000 |
| C | 1.039710000  | 0.619184000  | 5.591336000  |
| C | 1.039710000  | -0.619184000 | -5.591336000 |
| C | 1.104002000  | 0.552641000  | -2.705170000 |
| C | 1.104002000  | -0.552641000 | 2.705170000  |
| C | 2.142387000  | 1.488236000  | -3.113803000 |
| C | 2.142387000  | -1.488236000 | 3.113803000  |
| C | 2.165608000  | 2.295379000  | -4.394569000 |
| C | 2.165608000  | -2.295379000 | 4.394569000  |
| C | 2.644806000  | 0.606962000  | -1.069344000 |
| C | 2.644806000  | -0.606962000 | 1.069344000  |
| C | 3.067176000  | 1.556076000  | -2.077527000 |
| C | 3.067176000  | -1.556076000 | 2.077527000  |
| C | 3.351372000  | 0.000000000  | 0.000000000  |
| C | 4.122313000  | 2.631019000  | -1.885122000 |
| C | 4.122313000  | -2.631019000 | 1.885122000  |
| C | 4.819107000  | 0.000000000  | 0.000000000  |
| C | 5.533165000  | 0.257208000  | 1.183965000  |
| C | 5.533165000  | -0.257208000 | -1.183965000 |
| C | 6.923685000  | 0.259377000  | 1.181921000  |
| C | 6.923685000  | -0.259377000 | -1.181921000 |
| C | 7.623734000  | 0.000000000  | 0.000000000  |
| C | -1.030861000 | 0.633318000  | -6.982766000 |
| C | -1.030861000 | -0.633318000 | 6.982766000  |
| C | -1.039710000 | 0.619184000  | -5.591336000 |
| C | -1.039710000 | -0.619184000 | 5.591336000  |
| C | -1.104002000 | 0.552641000  | 2.705170000  |
| C | -1.104002000 | -0.552641000 | -2.705170000 |
| C | -2.142387000 | 1.488236000  | 3.113803000  |
| C | -2.142387000 | -1.488236000 | -3.113803000 |
| C | -2.165608000 | 2.295379000  | 4.394569000  |
| C | -2.165608000 | -2.295379000 | -4.394569000 |
| C | -2.644806000 | 0.606962000  | 1.069344000  |
| C | -2.644806000 | -0.606962000 | -1.069344000 |
| C | -3.067176000 | 1.556076000  | 2.077527000  |
| C | -3.067176000 | -1.556076000 | -2.077527000 |
| C | -3.351372000 | 0.000000000  | 0.000000000  |
| C | -4.122313000 | 2.631019000  | 1.885122000  |
| C | -4.122313000 | -2.631019000 | -1.885122000 |
| C | -4.819107000 | 0.000000000  | 0.000000000  |
| C | -5.533165000 | 0.257208000  | -1.183965000 |
| C | -5.533165000 | -0.257208000 | 1.183965000  |
| C | -6.923685000 | 0.259377000  | -1.181921000 |
| C | -6.923685000 | -0.259377000 | 1.181921000  |
| C | -7.623734000 | 0.000000000  | 0.000000000  |
| F | 0.918248000  | 2.664098000  | -4.778350000 |
| F | 0.918248000  | -2.664098000 | 4.778350000  |
| F | 2.731232000  | 1.588244000  | -5.415474000 |
| F | 2.731232000  | -1.588244000 | 5.415474000  |



|   |              |              |              |
|---|--------------|--------------|--------------|
| F | 2.886420000  | 3.436245000  | -4.295268000 |
| F | 2.886420000  | -3.436245000 | 4.295268000  |
| F | 3.554595000  | 3.868188000  | -1.907852000 |
| F | 3.554595000  | -3.868188000 | 1.907852000  |
| F | 4.749346000  | 2.553001000  | -0.689673000 |
| F | 4.749346000  | -2.553001000 | 0.689673000  |
| F | 5.080462000  | 2.594430000  | -2.851571000 |
| F | 5.080462000  | -2.594430000 | 2.851571000  |
| F | -0.918248000 | 2.664098000  | 4.778350000  |
| F | -0.918248000 | -2.664098000 | -4.778350000 |
| F | -2.731232000 | 1.588244000  | 5.415474000  |
| F | -2.731232000 | -1.588244000 | -5.415474000 |
| F | -2.886420000 | 3.436245000  | 4.295268000  |
| F | -2.886420000 | -3.436245000 | -4.295268000 |
| F | -3.554595000 | 3.868188000  | 1.907852000  |
| F | -3.554595000 | -3.868188000 | -1.907852000 |
| F | -4.749346000 | 2.553001000  | 0.689673000  |
| F | -4.749346000 | -2.553001000 | -0.689673000 |
| F | -5.080462000 | 2.594430000  | 2.851571000  |
| F | -5.080462000 | -2.594430000 | -2.851571000 |
| H | 0.000000000  | 0.000000000  | 8.770710000  |
| H | 0.000000000  | 0.000000000  | -8.770710000 |
| H | 1.833279000  | 1.132649000  | 7.522929000  |
| H | 1.833279000  | -1.132649000 | -7.522929000 |
| H | 1.841285000  | 1.107371000  | 5.039470000  |
| H | 1.841285000  | -1.107371000 | -5.039470000 |
| H | 4.986822000  | 0.482100000  | 2.098757000  |
| H | 4.986822000  | -0.482100000 | -2.098757000 |
| H | 7.464170000  | 0.470512000  | 2.102989000  |
| H | 7.464170000  | -0.470512000 | -2.102989000 |
| H | 8.713063000  | 0.000000000  | 0.000000000  |
| H | -1.833279000 | 1.132649000  | -7.522929000 |
| H | -1.833279000 | -1.132649000 | 7.522929000  |
| H | -1.841285000 | 1.107371000  | -5.039470000 |
| H | -1.841285000 | -1.107371000 | 5.039470000  |
| H | -4.986822000 | 0.482100000  | -2.098757000 |
| H | -4.986822000 | -0.482100000 | 2.098757000  |
| H | -7.464170000 | 0.470512000  | -2.102989000 |
| H | -7.464170000 | -0.470512000 | 2.102989000  |
| H | -8.713063000 | 0.000000000  | 0.000000000  |
| N | 1.398212000  | 0.141702000  | -1.422878000 |
| N | 1.398212000  | -0.141702000 | 1.422878000  |
| N | -1.398212000 | 0.141702000  | 1.422878000  |
| N | -1.398212000 | -0.141702000 | -1.422878000 |

**36. Pd[(CF<sub>3</sub>)<sub>8</sub>TPP]; S = 0 (ruffled)**

|    |             |              |              |
|----|-------------|--------------|--------------|
| Pd | 0.000000000 | 0.000000000  | 0.000000000  |
| C  | 0.538825000 | 4.129086000  | 0.435110000  |
| C  | 0.538825000 | -4.129086000 | -0.435110000 |

|   |              |              |              |
|---|--------------|--------------|--------------|
| C | 0.971915000  | 2.738159000  | 0.586795000  |
| C | 0.971915000  | -2.738159000 | -0.586795000 |
| C | 0.990212000  | 5.368558000  | 1.192783000  |
| C | 0.990212000  | -5.368558000 | -1.192783000 |
| C | 2.235773000  | 2.235773000  | 1.003119000  |
| C | 2.235773000  | -2.235773000 | -1.003119000 |
| C | 2.738159000  | 0.971915000  | 0.586795000  |
| C | 2.738159000  | -0.971915000 | -0.586795000 |
| C | 3.018331000  | 3.018331000  | 3.223992000  |
| C | 3.018331000  | -3.018331000 | -3.223992000 |
| C | 3.112913000  | 3.112913000  | 1.828254000  |
| C | 3.112913000  | -3.112913000 | -1.828254000 |
| C | 3.817584000  | 3.817584000  | 4.034517000  |
| C | 3.817584000  | -3.817584000 | -4.034517000 |
| C | 4.011796000  | 4.011796000  | 1.255896000  |
| C | 4.011796000  | -4.011796000 | -1.255896000 |
| C | 4.129086000  | 0.538825000  | 0.435110000  |
| C | 4.129086000  | -0.538825000 | -0.435110000 |
| C | 4.718173000  | 4.718173000  | 3.457011000  |
| C | 4.718173000  | -4.718173000 | -3.457011000 |
| C | 4.813705000  | 4.813705000  | 2.069758000  |
| C | 4.813705000  | -4.813705000 | -2.069758000 |
| C | 5.368558000  | 0.990212000  | 1.192783000  |
| C | 5.368558000  | -0.990212000 | -1.192783000 |
| C | -0.538825000 | 4.129086000  | -0.435110000 |
| C | -0.538825000 | -4.129086000 | 0.435110000  |
| C | -0.971915000 | 2.738159000  | -0.586795000 |
| C | -0.971915000 | -2.738159000 | 0.586795000  |
| C | -0.990212000 | 5.368558000  | -1.192783000 |
| C | -0.990212000 | -5.368558000 | 1.192783000  |
| C | -2.235773000 | 2.235773000  | -1.003119000 |
| C | -2.235773000 | -2.235773000 | 1.003119000  |
| C | -2.738159000 | 0.971915000  | -0.586795000 |
| C | -2.738159000 | -0.971915000 | 0.586795000  |
| C | -3.018331000 | 3.018331000  | -3.223992000 |
| C | -3.018331000 | -3.018331000 | 3.223992000  |
| C | -3.112913000 | 3.112913000  | -1.828254000 |
| C | -3.112913000 | -3.112913000 | 1.828254000  |
| C | -3.817584000 | 3.817584000  | -4.034517000 |
| C | -3.817584000 | -3.817584000 | 4.034517000  |
| C | -4.011796000 | 4.011796000  | -1.255896000 |
| C | -4.011796000 | -4.011796000 | 1.255896000  |
| C | -4.129086000 | 0.538825000  | -0.435110000 |
| C | -4.129086000 | -0.538825000 | 0.435110000  |
| C | -4.718173000 | 4.718173000  | -3.457011000 |
| C | -4.718173000 | -4.718173000 | 3.457011000  |
| C | -4.813705000 | 4.813705000  | -2.069758000 |
| C | -4.813705000 | -4.813705000 | 2.069758000  |
| C | -5.368558000 | 0.990212000  | -1.192783000 |
| C | -5.368558000 | -0.990212000 | 1.192783000  |
| F | 0.019457000  | 6.280645000  | -1.268826000 |

|   |              |              |              |
|---|--------------|--------------|--------------|
| F | 0.019457000  | -6.280645000 | 1.268826000  |
| F | 1.291988000  | 5.073480000  | 2.477710000  |
| F | 1.291988000  | -5.073480000 | -2.477710000 |
| F | 2.055611000  | 5.998680000  | 0.638331000  |
| F | 2.055611000  | -5.998680000 | -0.638331000 |
| F | 5.073480000  | 1.291988000  | 2.477710000  |
| F | 5.073480000  | -1.291988000 | -2.477710000 |
| F | 5.998680000  | 2.055611000  | 0.638331000  |
| F | 5.998680000  | -2.055611000 | -0.638331000 |
| F | 6.280645000  | 0.019457000  | -1.268826000 |
| F | 6.280645000  | -0.019457000 | 1.268826000  |
| F | -0.019457000 | 6.280645000  | 1.268826000  |
| F | -0.019457000 | -6.280645000 | -1.268826000 |
| F | -1.291988000 | 5.073480000  | -2.477710000 |
| F | -1.291988000 | -5.073480000 | 2.477710000  |
| F | -2.055611000 | 5.998680000  | -0.638331000 |
| F | -2.055611000 | -5.998680000 | 0.638331000  |
| F | -5.073480000 | 1.291988000  | -2.477710000 |
| F | -5.073480000 | -1.291988000 | 2.477710000  |
| F | -5.998680000 | 2.055611000  | -0.638331000 |
| F | -5.998680000 | -2.055611000 | 0.638331000  |
| F | -6.280645000 | 0.019457000  | 1.268826000  |
| F | -6.280645000 | -0.019457000 | -1.268826000 |
| H | 2.314126000  | 2.314126000  | 3.665088000  |
| H | 2.314126000  | -2.314126000 | -3.665088000 |
| H | 3.738822000  | 3.738822000  | 5.117614000  |
| H | 3.738822000  | -3.738822000 | -5.117614000 |
| H | 4.082807000  | 4.082807000  | 0.172419000  |
| H | 4.082807000  | -4.082807000 | -0.172419000 |
| H | 5.344524000  | 5.344524000  | 4.091229000  |
| H | 5.344524000  | -5.344524000 | -4.091229000 |
| H | 5.512662000  | 5.512662000  | 1.614056000  |
| H | 5.512662000  | -5.512662000 | -1.614056000 |
| H | -2.314126000 | 2.314126000  | -3.665088000 |
| H | -2.314126000 | -2.314126000 | 3.665088000  |
| H | -3.738822000 | 3.738822000  | -5.117614000 |
| H | -3.738822000 | -3.738822000 | 5.117614000  |
| H | -4.082807000 | 4.082807000  | -0.172419000 |
| H | -4.082807000 | -4.082807000 | 0.172419000  |
| H | -5.344524000 | 5.344524000  | -4.091229000 |
| H | -5.344524000 | -5.344524000 | 4.091229000  |
| H | -5.512662000 | 5.512662000  | -1.614056000 |
| H | -5.512662000 | -5.512662000 | 1.614056000  |
| N | 0.000000000  | 1.965902000  | 0.000000000  |
| N | 0.000000000  | -1.965902000 | 0.000000000  |
| N | 1.965902000  | 0.000000000  | 0.000000000  |
| N | -1.965902000 | 0.000000000  | 0.000000000  |

**37. Pt[(CF<sub>3</sub>)<sub>8</sub>TPP]; S = 0 (saddled)**

|    |              |              |              |
|----|--------------|--------------|--------------|
| Pt | 0.000000000  | 0.000000000  | 0.000000000  |
| C  | 0.000000000  | 0.000000000  | 3.421202000  |
| C  | 0.000000000  | 0.000000000  | 4.909577000  |
| C  | 0.000000000  | 0.000000000  | 7.704256000  |
| C  | 0.000000000  | 0.000000000  | -3.421202000 |
| C  | 0.000000000  | 0.000000000  | -4.909577000 |
| C  | 0.000000000  | 0.000000000  | -7.704256000 |
| C  | 0.714324000  | 0.975654000  | 7.005914000  |
| C  | 0.714324000  | -0.975654000 | -7.005914000 |
| C  | 0.726021000  | 0.967397000  | 5.612911000  |
| C  | 0.726021000  | -0.967397000 | -5.612911000 |
| C  | 1.130129000  | 0.512113000  | -2.736954000 |
| C  | 1.130129000  | -0.512113000 | 2.736954000  |
| C  | 2.239468000  | 1.348401000  | -3.192274000 |
| C  | 2.239468000  | -1.348401000 | 3.192274000  |
| C  | 2.344649000  | 2.072071000  | -4.518265000 |
| C  | 2.344649000  | -2.072071000 | 4.518265000  |
| C  | 2.662776000  | 0.582275000  | -1.086247000 |
| C  | 2.662776000  | -0.582275000 | 1.086247000  |
| C  | 3.140162000  | 1.448126000  | -2.142715000 |
| C  | 3.140162000  | -1.448126000 | 2.142715000  |
| C  | 3.356811000  | 0.000000000  | 0.000000000  |
| C  | 4.211979000  | 2.510185000  | -1.954971000 |
| C  | 4.211979000  | -2.510185000 | 1.954971000  |
| C  | 4.829759000  | 0.000000000  | 0.000000000  |
| C  | 5.543554000  | 0.338691000  | 1.162449000  |
| C  | 5.543554000  | -0.338691000 | -1.162449000 |
| C  | 6.934545000  | 0.341334000  | 1.160305000  |
| C  | 6.934545000  | -0.341334000 | -1.160305000 |
| C  | 7.634638000  | 0.000000000  | 0.000000000  |
| C  | -0.714324000 | 0.975654000  | -7.005914000 |
| C  | -0.714324000 | -0.975654000 | 7.005914000  |
| C  | -0.726021000 | 0.967397000  | -5.612911000 |
| C  | -0.726021000 | -0.967397000 | 5.612911000  |
| C  | -1.130129000 | 0.512113000  | 2.736954000  |
| C  | -1.130129000 | -0.512113000 | -2.736954000 |
| C  | -2.239468000 | 1.348401000  | 3.192274000  |
| C  | -2.239468000 | -1.348401000 | -3.192274000 |
| C  | -2.344649000 | 2.072071000  | 4.518265000  |
| C  | -2.344649000 | -2.072071000 | -4.518265000 |
| C  | -2.662776000 | 0.582275000  | 1.086247000  |
| C  | -2.662776000 | -0.582275000 | -1.086247000 |
| C  | -3.140162000 | 1.448126000  | 2.142715000  |
| C  | -3.140162000 | -1.448126000 | -2.142715000 |
| C  | -3.356811000 | 0.000000000  | 0.000000000  |
| C  | -4.211979000 | 2.510185000  | 1.954971000  |
| C  | -4.211979000 | -2.510185000 | -1.954971000 |
| C  | -4.829759000 | 0.000000000  | 0.000000000  |

|   |              |              |              |
|---|--------------|--------------|--------------|
| C | -5.543554000 | 0.338691000  | -1.162449000 |
| C | -5.543554000 | -0.338691000 | 1.162449000  |
| C | -6.934545000 | 0.341334000  | -1.160305000 |
| C | -6.934545000 | -0.341334000 | 1.160305000  |
| C | -7.634638000 | 0.000000000  | 0.000000000  |
| F | 1.254161000  | 2.858311000  | -4.736705000 |
| F | 1.254161000  | -2.858311000 | 4.736705000  |
| F | 2.465054000  | 1.215846000  | -5.562685000 |
| F | 2.465054000  | -1.215846000 | 5.562685000  |
| F | 3.428982000  | 2.880567000  | -4.592054000 |
| F | 3.428982000  | -2.880567000 | 4.592054000  |
| F | 3.711365000  | 3.744113000  | -2.241780000 |
| F | 3.711365000  | -3.744113000 | 2.241780000  |
| F | 4.630740000  | 2.587573000  | -0.668884000 |
| F | 4.630740000  | -2.587573000 | 0.668884000  |
| F | 5.310212000  | 2.317480000  | -2.729958000 |
| F | 5.310212000  | -2.317480000 | 2.729958000  |
| F | -1.254161000 | 2.858311000  | 4.736705000  |
| F | -1.254161000 | -2.858311000 | -4.736705000 |
| F | -2.465054000 | 1.215846000  | 5.562685000  |
| F | -2.465054000 | -1.215846000 | -5.562685000 |
| F | -3.428982000 | 2.880567000  | 4.592054000  |
| F | -3.428982000 | -2.880567000 | -4.592054000 |
| F | -3.711365000 | 3.744113000  | 2.241780000  |
| F | -3.711365000 | -3.744113000 | -2.241780000 |
| F | -4.630740000 | 2.587573000  | 0.668884000  |
| F | -4.630740000 | -2.587573000 | -0.668884000 |
| F | -5.310212000 | 2.317480000  | 2.729958000  |
| F | -5.310212000 | -2.317480000 | -2.729958000 |
| H | 0.000000000  | 0.000000000  | 8.793709000  |
| H | 0.000000000  | 0.000000000  | -8.793709000 |
| H | 1.269826000  | 1.740634000  | 7.545747000  |
| H | 1.269826000  | -1.740634000 | -7.545747000 |
| H | 1.287351000  | 1.719248000  | 5.060803000  |
| H | 1.287351000  | -1.719248000 | -5.060803000 |
| H | 4.997952000  | 0.627760000  | 2.059424000  |
| H | 4.997952000  | -0.627760000 | -2.059424000 |
| H | 7.474330000  | 0.615723000  | 2.064927000  |
| H | 7.474330000  | -0.615723000 | -2.064927000 |
| H | 8.723961000  | 0.000000000  | 0.000000000  |
| H | -1.269826000 | 1.740634000  | -7.545747000 |
| H | -1.269826000 | -1.740634000 | 7.545747000  |
| H | -1.287351000 | 1.719248000  | -5.060803000 |
| H | -1.287351000 | -1.719248000 | 5.060803000  |
| H | -4.997952000 | 0.627760000  | -2.059424000 |
| H | -4.997952000 | -0.627760000 | 2.059424000  |
| H | -7.474330000 | 0.615723000  | -2.064927000 |
| H | -7.474330000 | -0.615723000 | 2.064927000  |
| H | -8.723961000 | 0.000000000  | 0.000000000  |
| N | 1.387165000  | 0.182135000  | -1.418765000 |
| N | 1.387165000  | -0.182135000 | 1.418765000  |

|   |              |              |              |
|---|--------------|--------------|--------------|
| N | -1.387165000 | 0.182135000  | 1.418765000  |
| N | -1.387165000 | -0.182135000 | -1.418765000 |

**38. Pt[(CF<sub>3</sub>)<sub>8</sub>TPP]; S = 0 (ruffled)**

|    |              |              |              |
|----|--------------|--------------|--------------|
| Pt | 0.000000000  | 0.000000000  | 0.000000000  |
| C  | 0.543653000  | 4.136571000  | 0.428801000  |
| C  | 0.543653000  | -4.136571000 | -0.428801000 |
| C  | 0.980062000  | 2.748740000  | 0.576843000  |
| C  | 0.980062000  | -2.748740000 | -0.576843000 |
| C  | 0.999548000  | 5.376649000  | 1.182741000  |
| C  | 0.999548000  | -5.376649000 | -1.182741000 |
| C  | 2.246730000  | 2.246730000  | 0.986216000  |
| C  | 2.246730000  | -2.246730000 | -0.986216000 |
| C  | 2.748740000  | 0.980062000  | 0.576843000  |
| C  | 2.748740000  | -0.980062000 | -0.576843000 |
| C  | 3.039565000  | 3.039565000  | 3.199588000  |
| C  | 3.039565000  | -3.039565000 | -3.199588000 |
| C  | 3.128048000  | 3.128048000  | 1.802955000  |
| C  | 3.128048000  | -3.128048000 | -1.802955000 |
| C  | 3.842362000  | 3.842362000  | 4.002957000  |
| C  | 3.842362000  | -3.842362000 | -4.002957000 |
| C  | 4.024294000  | 4.024294000  | 1.222539000  |
| C  | 4.024294000  | -4.024294000 | -1.222539000 |
| C  | 4.136571000  | 0.543653000  | 0.428801000  |
| C  | 4.136571000  | -0.543653000 | -0.428801000 |
| C  | 4.740346000  | 4.740346000  | 3.417363000  |
| C  | 4.740346000  | -4.740346000 | -3.417363000 |
| C  | 4.829793000  | 4.829793000  | 2.029337000  |
| C  | 4.829793000  | -4.829793000 | -2.029337000 |
| C  | 5.376649000  | 0.999548000  | 1.182741000  |
| C  | 5.376649000  | -0.999548000 | -1.182741000 |
| C  | -0.543653000 | 4.136571000  | -0.428801000 |
| C  | -0.543653000 | -4.136571000 | 0.428801000  |
| C  | -0.980062000 | 2.748740000  | -0.576843000 |
| C  | -0.980062000 | -2.748740000 | 0.576843000  |
| C  | -0.999548000 | 5.376649000  | -1.182741000 |
| C  | -0.999548000 | -5.376649000 | 1.182741000  |
| C  | -2.246730000 | 2.246730000  | -0.986216000 |
| C  | -2.246730000 | -2.246730000 | 0.986216000  |
| C  | -2.748740000 | 0.980062000  | -0.576843000 |
| C  | -2.748740000 | -0.980062000 | 0.576843000  |
| C  | -3.039565000 | 3.039565000  | -3.199588000 |
| C  | -3.039565000 | -3.039565000 | 3.199588000  |
| C  | -3.128048000 | 3.128048000  | -1.802955000 |
| C  | -3.128048000 | -3.128048000 | 1.802955000  |
| C  | -3.842362000 | 3.842362000  | -4.002957000 |
| C  | -3.842362000 | -3.842362000 | 4.002957000  |
| C  | -4.024294000 | 4.024294000  | -1.222539000 |
| C  | -4.024294000 | -4.024294000 | 1.222539000  |

|   |              |              |              |
|---|--------------|--------------|--------------|
| C | -4.136571000 | 0.543653000  | -0.428801000 |
| C | -4.136571000 | -0.543653000 | 0.428801000  |
| C | -4.740346000 | 4.740346000  | -3.417363000 |
| C | -4.740346000 | -4.740346000 | 3.417363000  |
| C | -4.829793000 | 4.829793000  | -2.029337000 |
| C | -4.829793000 | -4.829793000 | 2.029337000  |
| C | -5.376649000 | 0.999548000  | -1.182741000 |
| C | -5.376649000 | -0.999548000 | 1.182741000  |
| F | 0.010457000  | 6.287701000  | -1.266230000 |
| F | 0.010457000  | -6.287701000 | 1.266230000  |
| F | 1.310162000  | 5.082774000  | 2.465781000  |
| F | 1.310162000  | -5.082774000 | -2.465781000 |
| F | 2.060455000  | 6.007792000  | 0.620842000  |
| F | 2.060455000  | -6.007792000 | -0.620842000 |
| F | 5.082774000  | 1.310162000  | 2.465781000  |
| F | 5.082774000  | -1.310162000 | -2.465781000 |
| F | 6.007792000  | 2.060455000  | 0.620842000  |
| F | 6.007792000  | -2.060455000 | -0.620842000 |
| F | 6.287701000  | 0.010457000  | -1.266230000 |
| F | 6.287701000  | -0.010457000 | 1.266230000  |
| F | -0.010457000 | 6.287701000  | 1.266230000  |
| F | -0.010457000 | -6.287701000 | -1.266230000 |
| F | -1.310162000 | 5.082774000  | -2.465781000 |
| F | -1.310162000 | -5.082774000 | 2.465781000  |
| F | -2.060455000 | 6.007792000  | -0.620842000 |
| F | -2.060455000 | -6.007792000 | 0.620842000  |
| F | -5.082774000 | 1.310162000  | -2.465781000 |
| F | -5.082774000 | -1.310162000 | 2.465781000  |
| F | -6.007792000 | 2.060455000  | -0.620842000 |
| F | -6.007792000 | -2.060455000 | 0.620842000  |
| F | -6.287701000 | 0.010457000  | 1.266230000  |
| F | -6.287701000 | -0.010457000 | -1.266230000 |
| H | 2.337178000  | 2.337178000  | 3.646378000  |
| H | 2.337178000  | -2.337178000 | -3.646378000 |
| H | 3.768537000  | 3.768537000  | 5.086720000  |
| H | 3.768537000  | -3.768537000 | -5.086720000 |
| H | 4.090354000  | 4.090354000  | 0.138401000  |
| H | 4.090354000  | -4.090354000 | -0.138401000 |
| H | 5.369495000  | 5.369495000  | 4.045988000  |
| H | 5.369495000  | -5.369495000 | -4.045988000 |
| H | 5.526762000  | 5.526762000  | 1.567567000  |
| H | 5.526762000  | -5.526762000 | -1.567567000 |
| H | -2.337178000 | 2.337178000  | -3.646378000 |
| H | -2.337178000 | -2.337178000 | 3.646378000  |
| H | -3.768537000 | 3.768537000  | -5.086720000 |
| H | -3.768537000 | -3.768537000 | 5.086720000  |
| H | -4.090354000 | 4.090354000  | -0.138401000 |
| H | -4.090354000 | -4.090354000 | 0.138401000  |
| H | -5.369495000 | 5.369495000  | -4.045988000 |
| H | -5.369495000 | -5.369495000 | 4.045988000  |
| H | -5.526762000 | 5.526762000  | -1.567567000 |

|   |              |              |             |
|---|--------------|--------------|-------------|
| H | -5.526762000 | -5.526762000 | 1.567567000 |
| N | 0.000000000  | 1.973353000  | 0.000000000 |
| N | 0.000000000  | -1.973353000 | 0.000000000 |
| N | 1.973353000  | 0.000000000  | 0.000000000 |
| N | -1.973353000 | 0.000000000  | 0.000000000 |

**39. Zn[(CF<sub>3</sub>)<sub>8</sub>TPP]; S = 0 (saddled)**

|    |              |              |              |
|----|--------------|--------------|--------------|
| Zn | 0.000000000  | 0.000000000  | 0.000000000  |
| C  | 0.000000000  | 0.000000000  | 3.408437000  |
| C  | 0.000000000  | 0.000000000  | 4.878070000  |
| C  | 0.000000000  | 0.000000000  | 7.680413000  |
| C  | 0.000000000  | 0.000000000  | -3.408437000 |
| C  | 0.000000000  | 0.000000000  | -4.878070000 |
| C  | 0.000000000  | 0.000000000  | -7.680413000 |
| C  | 1.095060000  | 0.514458000  | 6.981105000  |
| C  | 1.095060000  | -0.514458000 | -6.981105000 |
| C  | 1.100722000  | 0.503664000  | 5.590402000  |
| C  | 1.100722000  | -0.503664000 | -5.590402000 |
| C  | 1.111380000  | 0.552566000  | -2.703214000 |
| C  | 1.111380000  | -0.552566000 | 2.703214000  |
| C  | 2.125557000  | 1.513527000  | -3.104863000 |
| C  | 2.125557000  | -1.513527000 | 3.104863000  |
| C  | 2.125606000  | 2.360285000  | -4.360990000 |
| C  | 2.125606000  | -2.360285000 | 4.360990000  |
| C  | 2.650607000  | 0.596421000  | -1.083824000 |
| C  | 2.650607000  | -0.596421000 | 1.083824000  |
| C  | 3.062838000  | 1.567921000  | -2.074681000 |
| C  | 3.062838000  | -1.567921000 | 2.074681000  |
| C  | 3.360290000  | 0.000000000  | 0.000000000  |
| C  | 4.108079000  | 2.652260000  | -1.887570000 |
| C  | 4.108079000  | -2.652260000 | 1.887570000  |
| C  | 4.823564000  | 0.000000000  | 0.000000000  |
| C  | 5.540319000  | 0.248867000  | 1.186190000  |
| C  | 5.540319000  | -0.248867000 | -1.186190000 |
| C  | 6.930398000  | 0.250498000  | 1.184012000  |
| C  | 6.930398000  | -0.250498000 | -1.184012000 |
| C  | 7.630780000  | 0.000000000  | 0.000000000  |
| C  | -1.095060000 | 0.514458000  | -6.981105000 |
| C  | -1.095060000 | -0.514458000 | 6.981105000  |
| C  | -1.100722000 | 0.503664000  | -5.590402000 |
| C  | -1.100722000 | -0.503664000 | 5.590402000  |
| C  | -1.111380000 | 0.552566000  | 2.703214000  |
| C  | -1.111380000 | -0.552566000 | -2.703214000 |
| C  | -2.125557000 | 1.513527000  | 3.104863000  |
| C  | -2.125557000 | -1.513527000 | -3.104863000 |
| C  | -2.125606000 | 2.360285000  | 4.360990000  |
| C  | -2.125606000 | -2.360285000 | -4.360990000 |
| C  | -2.650607000 | 0.596421000  | 1.083824000  |
| C  | -2.650607000 | -0.596421000 | -1.083824000 |



|   |              |              |              |
|---|--------------|--------------|--------------|
| C | -3.062838000 | 1.567921000  | 2.074681000  |
| C | -3.062838000 | -1.567921000 | -2.074681000 |
| C | -3.360290000 | 0.000000000  | 0.000000000  |
| C | -4.108079000 | 2.652260000  | 1.887570000  |
| C | -4.108079000 | -2.652260000 | -1.887570000 |
| C | -4.823564000 | 0.000000000  | 0.000000000  |
| C | -5.540319000 | 0.248867000  | -1.186190000 |
| C | -5.540319000 | -0.248867000 | 1.186190000  |
| C | -6.930398000 | 0.250498000  | -1.184012000 |
| C | -6.930398000 | -0.250498000 | 1.184012000  |
| C | -7.630780000 | 0.000000000  | 0.000000000  |
| F | 0.869923000  | 2.621930000  | -4.797093000 |
| F | 0.869923000  | -2.621930000 | 4.797093000  |
| F | 2.724214000  | 3.563028000  | -4.193630000 |
| F | 2.724214000  | -3.563028000 | 4.193630000  |
| F | 2.804299000  | 1.741799000  | -5.372250000 |
| F | 2.804299000  | -1.741799000 | 5.372250000  |
| F | 3.515177000  | 3.876704000  | -1.815183000 |
| F | 3.515177000  | -3.876704000 | 1.815183000  |
| F | 4.814097000  | 2.534778000  | -0.741875000 |
| F | 4.814097000  | -2.534778000 | 0.741875000  |
| F | 5.001931000  | 2.682234000  | -2.914941000 |
| F | 5.001931000  | -2.682234000 | 2.914941000  |
| F | -0.869923000 | 2.621930000  | 4.797093000  |
| F | -0.869923000 | -2.621930000 | -4.797093000 |
| F | -2.724214000 | 3.563028000  | 4.193630000  |
| F | -2.724214000 | -3.563028000 | -4.193630000 |
| F | -2.804299000 | 1.741799000  | 5.372250000  |
| F | -2.804299000 | -1.741799000 | -5.372250000 |
| F | -3.515177000 | 3.876704000  | 1.815183000  |
| F | -3.515177000 | -3.876704000 | -1.815183000 |
| F | -4.814097000 | 2.534778000  | 0.741875000  |
| F | -4.814097000 | -2.534778000 | -0.741875000 |
| F | -5.001931000 | 2.682234000  | 2.914941000  |
| F | -5.001931000 | -2.682234000 | -2.914941000 |
| H | 0.000000000  | 0.000000000  | 8.769843000  |
| H | 0.000000000  | 0.000000000  | -8.769843000 |
| H | 1.947658000  | 0.922122000  | 7.521363000  |
| H | 1.947658000  | -0.922122000 | -7.521363000 |
| H | 1.948364000  | 0.908436000  | 5.040219000  |
| H | 1.948364000  | -0.908436000 | -5.040219000 |
| H | 4.994367000  | 0.469688000  | 2.102188000  |
| H | 4.994367000  | -0.469688000 | -2.102188000 |
| H | 7.471183000  | 0.455847000  | 2.106322000  |
| H | 7.471183000  | -0.455847000 | -2.106322000 |
| H | 8.720092000  | 0.000000000  | 0.000000000  |
| H | -1.947658000 | 0.922122000  | -7.521363000 |
| H | -1.947658000 | -0.922122000 | 7.521363000  |
| H | -1.948364000 | 0.908436000  | -5.040219000 |
| H | -1.948364000 | -0.908436000 | 5.040219000  |
| H | -4.994367000 | 0.469688000  | -2.102188000 |

|   |              |              |              |
|---|--------------|--------------|--------------|
| H | -4.994367000 | -0.469688000 | 2.102188000  |
| H | -7.471183000 | 0.455847000  | -2.106322000 |
| H | -7.471183000 | -0.455847000 | 2.106322000  |
| H | -8.720092000 | 0.000000000  | 0.000000000  |
| N | 1.419222000  | 0.116365000  | -1.440795000 |
| N | 1.419222000  | -0.116365000 | 1.440795000  |
| N | -1.419222000 | 0.116365000  | 1.440795000  |
| N | -1.419222000 | -0.116365000 | -1.440795000 |

**40. Zn[(CF<sub>3</sub>)<sub>8</sub>TPP]; S = 0 (ruffled)**

|    |              |              |              |
|----|--------------|--------------|--------------|
| Zn | 0.000000000  | 0.000000000  | 0.000000000  |
| C  | 0.544148000  | 4.145322000  | 0.429586000  |
| C  | 0.544148000  | -4.145322000 | -0.429586000 |
| C  | 0.974640000  | 2.751993000  | 0.571702000  |
| C  | 0.974640000  | -2.751993000 | -0.571702000 |
| C  | 0.995323000  | 5.385510000  | 1.186117000  |
| C  | 0.995323000  | -5.385510000 | -1.186117000 |
| C  | 2.244801000  | 2.244801000  | 0.980668000  |
| C  | 2.244801000  | -2.244801000 | -0.980668000 |
| C  | 2.751993000  | 0.974640000  | 0.571702000  |
| C  | 2.751993000  | -0.974640000 | -0.571702000 |
| C  | 3.051561000  | 3.051561000  | 3.186671000  |
| C  | 3.051561000  | -3.051561000 | -3.186671000 |
| C  | 3.130178000  | 3.130178000  | 1.788981000  |
| C  | 3.130178000  | -3.130178000 | -1.788981000 |
| C  | 3.859311000  | 3.859311000  | 3.980056000  |
| C  | 3.859311000  | -3.859311000 | -3.980056000 |
| C  | 4.023070000  | 4.023070000  | 1.197836000  |
| C  | 4.023070000  | -4.023070000 | -1.197836000 |
| C  | 4.145322000  | 0.544148000  | 0.429586000  |
| C  | 4.145322000  | -0.544148000 | -0.429586000 |
| C  | 4.753540000  | 4.753540000  | 3.383272000  |
| C  | 4.753540000  | -4.753540000 | -3.383272000 |
| C  | 4.833804000  | 4.833804000  | 1.994179000  |
| C  | 4.833804000  | -4.833804000 | -1.994179000 |
| C  | 5.385510000  | 0.995323000  | 1.186117000  |
| C  | 5.385510000  | -0.995323000 | -1.186117000 |
| C  | -0.544148000 | 4.145322000  | -0.429586000 |
| C  | -0.544148000 | -4.145322000 | 0.429586000  |
| C  | -0.974640000 | 2.751993000  | -0.571702000 |
| C  | -0.974640000 | -2.751993000 | 0.571702000  |
| C  | -0.995323000 | 5.385510000  | -1.186117000 |
| C  | -0.995323000 | -5.385510000 | 1.186117000  |
| C  | -2.244801000 | 2.244801000  | -0.980668000 |
| C  | -2.244801000 | -2.244801000 | 0.980668000  |
| C  | -2.751993000 | 0.974640000  | -0.571702000 |
| C  | -2.751993000 | -0.974640000 | 0.571702000  |
| C  | -3.051561000 | 3.051561000  | -3.186671000 |
| C  | -3.051561000 | -3.051561000 | 3.186671000  |

|   |              |              |              |
|---|--------------|--------------|--------------|
| C | -3.130178000 | 3.130178000  | -1.788981000 |
| C | -3.130178000 | -3.130178000 | 1.788981000  |
| C | -3.859311000 | 3.859311000  | -3.980056000 |
| C | -3.859311000 | -3.859311000 | 3.980056000  |
| C | -4.023070000 | 4.023070000  | -1.197836000 |
| C | -4.023070000 | -4.023070000 | 1.197836000  |
| C | -4.145322000 | 0.544148000  | -0.429586000 |
| C | -4.145322000 | -0.544148000 | 0.429586000  |
| C | -4.753540000 | 4.753540000  | -3.383272000 |
| C | -4.753540000 | -4.753540000 | 3.383272000  |
| C | -4.833804000 | 4.833804000  | -1.994179000 |
| C | -4.833804000 | -4.833804000 | 1.994179000  |
| C | -5.385510000 | 0.995323000  | -1.186117000 |
| C | -5.385510000 | -0.995323000 | 1.186117000  |
| F | 0.015068000  | 6.296707000  | -1.269985000 |
| F | 0.015068000  | -6.296707000 | 1.269985000  |
| F | 1.303337000  | 5.087894000  | 2.469426000  |
| F | 1.303337000  | -5.087894000 | -2.469426000 |
| F | 2.057076000  | 6.018346000  | 0.628421000  |
| F | 2.057076000  | -6.018346000 | -0.628421000 |
| F | 5.087894000  | 1.303337000  | 2.469426000  |
| F | 5.087894000  | -1.303337000 | -2.469426000 |
| F | 6.018346000  | 2.057076000  | 0.628421000  |
| F | 6.018346000  | -2.057076000 | -0.628421000 |
| F | 6.296707000  | 0.015068000  | -1.269985000 |
| F | 6.296707000  | -0.015068000 | 1.269985000  |
| F | -0.015068000 | 6.296707000  | 1.269985000  |
| F | -0.015068000 | -6.296707000 | -1.269985000 |
| F | -1.303337000 | 5.087894000  | -2.469426000 |
| F | -1.303337000 | -5.087894000 | 2.469426000  |
| F | -2.057076000 | 6.018346000  | -0.628421000 |
| F | -2.057076000 | -6.018346000 | 0.628421000  |
| F | -5.087894000 | 1.303337000  | -2.469426000 |
| F | -5.087894000 | -1.303337000 | 2.469426000  |
| F | -6.018346000 | 2.057076000  | -0.628421000 |
| F | -6.018346000 | -2.057076000 | 0.628421000  |
| F | -6.296707000 | 0.015068000  | 1.269985000  |
| F | -6.296707000 | -0.015068000 | -1.269985000 |
| H | 2.352457000  | 2.352457000  | 3.643625000  |
| H | 2.352457000  | -2.352457000 | -3.643625000 |
| H | 3.792179000  | 3.792179000  | 5.064711000  |
| H | 3.792179000  | -3.792179000 | -5.064711000 |
| H | 4.082492000  | 4.082492000  | 0.112878000  |
| H | 4.082492000  | -4.082492000 | -0.112878000 |
| H | 5.386715000  | 5.386715000  | 4.003789000  |
| H | 5.386715000  | -5.386715000 | -4.003789000 |
| H | 5.527690000  | 5.527690000  | 1.523224000  |
| H | 5.527690000  | -5.527690000 | -1.523224000 |
| H | -2.352457000 | 2.352457000  | -3.643625000 |
| H | -2.352457000 | -2.352457000 | 3.643625000  |
| H | -3.792179000 | 3.792179000  | -5.064711000 |

|   |              |              |              |
|---|--------------|--------------|--------------|
| H | -3.792179000 | -3.792179000 | 5.064711000  |
| H | -4.082492000 | 4.082492000  | -0.112878000 |
| H | -4.082492000 | -4.082492000 | 0.112878000  |
| H | -5.386715000 | 5.386715000  | -4.003789000 |
| H | -5.386715000 | -5.386715000 | 4.003789000  |
| H | -5.527690000 | 5.527690000  | -1.523224000 |
| H | -5.527690000 | -5.527690000 | 1.523224000  |
| N | 0.000000000  | 1.977195000  | 0.000000000  |
| N | 0.000000000  | -1.977195000 | 0.000000000  |
| N | 1.977195000  | 0.000000000  | 0.000000000  |
| N | -1.977195000 | 0.000000000  | 0.000000000  |

**41. Cu[Me<sub>8</sub>TPP]; S = ½ (saddled)**

|    |              |              |              |
|----|--------------|--------------|--------------|
| Cu | 0.000000000  | 0.000000000  | 0.000000000  |
| C  | 0.000000000  | 0.000000000  | 3.396883000  |
| C  | 0.000000000  | 0.000000000  | 4.882326000  |
| C  | 0.000000000  | 0.000000000  | 7.694377000  |
| C  | 0.000000000  | 0.000000000  | -3.396883000 |
| C  | 0.000000000  | 0.000000000  | -4.882326000 |
| C  | 0.000000000  | 0.000000000  | -7.694377000 |
| C  | 0.917189000  | 0.786674000  | 6.991614000  |
| C  | 0.917189000  | -0.786674000 | -6.991614000 |
| C  | 0.919198000  | 0.781796000  | 5.597199000  |
| C  | 0.919198000  | -0.781796000 | -5.597199000 |
| C  | 1.158702000  | 0.428754000  | -2.724021000 |
| C  | 1.158702000  | -0.428754000 | 2.724021000  |
| C  | 2.314574000  | 1.105658000  | -3.289446000 |
| C  | 2.314574000  | -1.105658000 | 3.289446000  |
| C  | 2.436940000  | 1.792755000  | -4.617432000 |
| C  | 2.436940000  | -1.792755000 | 4.617432000  |
| C  | 2.723997000  | 0.428709000  | -1.158710000 |
| C  | 2.723997000  | -0.428709000 | 1.158710000  |
| C  | 3.289446000  | 1.105560000  | -2.314571000 |
| C  | 3.289446000  | -1.105560000 | 2.314571000  |
| C  | 3.396825000  | 0.000000000  | 0.000000000  |
| C  | 4.617462000  | 1.792596000  | -2.436808000 |
| C  | 4.617462000  | -1.792596000 | 2.436808000  |
| C  | 4.882225000  | 0.000000000  | 0.000000000  |
| C  | 5.597062000  | 0.782370000  | 0.918715000  |
| C  | 5.597062000  | -0.782370000 | -0.918715000 |
| C  | 6.991460000  | 0.787387000  | 0.916581000  |
| C  | 6.991460000  | -0.787387000 | -0.916581000 |
| C  | 7.694217000  | 0.000000000  | 0.000000000  |
| C  | -0.917189000 | 0.786674000  | -6.991614000 |
| C  | -0.917189000 | -0.786674000 | 6.991614000  |
| C  | -0.919198000 | 0.781796000  | -5.597199000 |
| C  | -0.919198000 | -0.781796000 | 5.597199000  |
| C  | -1.158702000 | 0.428754000  | 2.724021000  |
| C  | -1.158702000 | -0.428754000 | -2.724021000 |

|   |              |              |              |
|---|--------------|--------------|--------------|
| C | -2.314574000 | 1.105658000  | 3.289446000  |
| C | -2.314574000 | -1.105658000 | -3.289446000 |
| C | -2.436940000 | 1.792755000  | 4.617432000  |
| C | -2.436940000 | -1.792755000 | -4.617432000 |
| C | -2.723997000 | 0.428709000  | 1.158710000  |
| C | -2.723997000 | -0.428709000 | -1.158710000 |
| C | -3.289446000 | 1.105560000  | 2.314571000  |
| C | -3.289446000 | -1.105560000 | -2.314571000 |
| C | -3.396825000 | 0.000000000  | 0.000000000  |
| C | -4.617462000 | 1.792596000  | 2.436808000  |
| C | -4.617462000 | -1.792596000 | -2.436808000 |
| C | -4.882225000 | 0.000000000  | 0.000000000  |
| C | -5.597062000 | 0.782370000  | -0.918715000 |
| C | -5.597062000 | -0.782370000 | 0.918715000  |
| C | -6.991460000 | 0.787387000  | -0.916581000 |
| C | -6.991460000 | -0.787387000 | 0.916581000  |
| C | -7.694217000 | 0.000000000  | 0.000000000  |
| H | 0.000000000  | 0.000000000  | 8.784005000  |
| H | 0.000000000  | 0.000000000  | -8.784005000 |
| H | 1.467262000  | 2.126647000  | -5.002129000 |
| H | 1.467262000  | -2.126647000 | 5.002129000  |
| H | 1.632701000  | 1.405548000  | 7.531969000  |
| H | 1.632701000  | -1.405548000 | -7.531969000 |
| H | 1.633483000  | 1.389261000  | 5.041988000  |
| H | 1.633483000  | -1.389261000 | -5.041988000 |
| H | 2.880076000  | 1.140484000  | -5.384552000 |
| H | 2.880076000  | -1.140484000 | 5.384552000  |
| H | 3.087603000  | 2.672746000  | -4.526726000 |
| H | 3.087603000  | -2.672746000 | 4.526726000  |
| H | 4.526863000  | 2.672605000  | -3.087462000 |
| H | 4.526863000  | -2.672605000 | 3.087462000  |
| H | 5.002089000  | 2.126453000  | -1.467091000 |
| H | 5.002089000  | -2.126453000 | 1.467091000  |
| H | 5.041836000  | 1.390319000  | 1.632585000  |
| H | 5.041836000  | -1.390319000 | -1.632585000 |
| H | 5.384589000  | 1.140290000  | -2.879870000 |
| H | 5.384589000  | -1.140290000 | 2.879870000  |
| H | 7.531787000  | 1.406927000  | 1.631511000  |
| H | 7.531787000  | -1.406927000 | -1.631511000 |
| H | 8.783844000  | 0.000000000  | 0.000000000  |
| H | -1.467262000 | 2.126647000  | 5.002129000  |
| H | -1.467262000 | -2.126647000 | -5.002129000 |
| H | -1.632701000 | 1.405548000  | -7.531969000 |
| H | -1.632701000 | -1.405548000 | 7.531969000  |
| H | -1.633483000 | 1.389261000  | -5.041988000 |
| H | -1.633483000 | -1.389261000 | 5.041988000  |
| H | -2.880076000 | 1.140484000  | 5.384552000  |
| H | -2.880076000 | -1.140484000 | -5.384552000 |
| H | -3.087603000 | 2.672746000  | 4.526726000  |
| H | -3.087603000 | -2.672746000 | -4.526726000 |
| H | -4.526863000 | 2.672605000  | 3.087462000  |

|   |              |              |              |
|---|--------------|--------------|--------------|
| H | -4.526863000 | -2.672605000 | -3.087462000 |
| H | -5.002089000 | 2.126453000  | 1.467091000  |
| H | -5.002089000 | -2.126453000 | -1.467091000 |
| H | -5.041836000 | 1.390319000  | -1.632585000 |
| H | -5.041836000 | -1.390319000 | 1.632585000  |
| H | -5.384589000 | 1.140290000  | 2.879870000  |
| H | -5.384589000 | -1.140290000 | -2.879870000 |
| H | -7.531787000 | 1.406927000  | -1.631511000 |
| H | -7.531787000 | -1.406927000 | 1.631511000  |
| H | -8.783844000 | 0.000000000  | 0.000000000  |
| N | 1.402231000  | 0.126000000  | -1.402239000 |
| N | 1.402231000  | -0.126000000 | 1.402239000  |
| N | -1.402231000 | 0.126000000  | 1.402239000  |
| N | -1.402231000 | -0.126000000 | -1.402239000 |

**42. Cu[Me<sub>3</sub>TPP]; S = ½ (ruffled)**

|    |              |              |              |
|----|--------------|--------------|--------------|
| Cu | 0.000000000  | 0.000000000  | 0.000000000  |
| C  | 0.617749000  | 4.186902000  | 0.302882000  |
| C  | 0.617749000  | -4.186902000 | -0.302882000 |
| C  | 1.034840000  | 2.792934000  | 0.407667000  |
| C  | 1.034840000  | -2.792934000 | -0.407667000 |
| C  | 1.312005000  | 5.446966000  | 0.739371000  |
| C  | 1.312005000  | -5.446966000 | -0.739371000 |
| C  | 2.333161000  | 2.333161000  | 0.694636000  |
| C  | 2.333161000  | -2.333161000 | -0.694636000 |
| C  | 2.792934000  | 1.034840000  | 0.407667000  |
| C  | 2.792934000  | -1.034840000 | -0.407667000 |
| C  | 3.324039000  | 3.324039000  | 1.211382000  |
| C  | 3.324039000  | -3.324039000 | -1.211382000 |
| C  | 3.488522000  | 3.488522000  | 2.591874000  |
| C  | 3.488522000  | -3.488522000 | -2.591874000 |
| C  | 4.097718000  | 4.097718000  | 0.339656000  |
| C  | 4.097718000  | -4.097718000 | -0.339656000 |
| C  | 4.186902000  | 0.617749000  | 0.302882000  |
| C  | 4.186902000  | -0.617749000 | -0.302882000 |
| C  | 4.410193000  | 4.410193000  | 3.092129000  |
| C  | 4.410193000  | -4.410193000 | -3.092129000 |
| C  | 5.019509000  | 5.019509000  | 0.834664000  |
| C  | 5.019509000  | -5.019509000 | -0.834664000 |
| C  | 5.178667000  | 5.178667000  | 2.213611000  |
| C  | 5.178667000  | -5.178667000 | -2.213611000 |
| C  | 5.446966000  | 1.312005000  | 0.739371000  |
| C  | 5.446966000  | -1.312005000 | -0.739371000 |
| C  | -0.617749000 | 4.186902000  | -0.302882000 |
| C  | -0.617749000 | -4.186902000 | 0.302882000  |
| C  | -1.034840000 | 2.792934000  | -0.407667000 |
| C  | -1.034840000 | -2.792934000 | 0.407667000  |
| C  | -1.312005000 | 5.446966000  | -0.739371000 |
| C  | -1.312005000 | -5.446966000 | 0.739371000  |

|   |              |              |              |
|---|--------------|--------------|--------------|
| C | -2.333161000 | 2.333161000  | -0.694636000 |
| C | -2.333161000 | -2.333161000 | 0.694636000  |
| C | -2.792934000 | 1.034840000  | -0.407667000 |
| C | -2.792934000 | -1.034840000 | 0.407667000  |
| C | -3.324039000 | 3.324039000  | -1.211382000 |
| C | -3.324039000 | -3.324039000 | 1.211382000  |
| C | -3.488522000 | 3.488522000  | -2.591874000 |
| C | -3.488522000 | -3.488522000 | 2.591874000  |
| C | -4.097718000 | 4.097718000  | -0.339656000 |
| C | -4.097718000 | -4.097718000 | 0.339656000  |
| C | -4.186902000 | 0.617749000  | -0.302882000 |
| C | -4.186902000 | -0.617749000 | 0.302882000  |
| C | -4.410193000 | 4.410193000  | -3.092129000 |
| C | -4.410193000 | -4.410193000 | 3.092129000  |
| C | -5.019509000 | 5.019509000  | -0.834664000 |
| C | -5.019509000 | -5.019509000 | 0.834664000  |
| C | -5.178667000 | 5.178667000  | -2.213611000 |
| C | -5.178667000 | -5.178667000 | 2.213611000  |
| C | -5.446966000 | 1.312005000  | -0.739371000 |
| C | -5.446966000 | -1.312005000 | 0.739371000  |
| H | 0.576656000  | 6.248658000  | 0.874352000  |
| H | 0.576656000  | -6.248658000 | -0.874352000 |
| H | 1.840723000  | 5.323970000  | 1.689921000  |
| H | 1.840723000  | -5.323970000 | -1.689921000 |
| H | 2.052796000  | 5.795537000  | 0.004857000  |
| H | 2.052796000  | -5.795537000 | -0.004857000 |
| H | 2.885429000  | 2.885429000  | 3.269870000  |
| H | 2.885429000  | -2.885429000 | -3.269870000 |
| H | 3.966831000  | 3.966831000  | -0.734178000 |
| H | 3.966831000  | -3.966831000 | 0.734178000  |
| H | 4.528589000  | 4.528589000  | 4.168490000  |
| H | 4.528589000  | -4.528589000 | -4.168490000 |
| H | 5.323970000  | 1.840723000  | 1.689921000  |
| H | 5.323970000  | -1.840723000 | -1.689921000 |
| H | 5.615167000  | 5.615167000  | 0.143772000  |
| H | 5.615167000  | -5.615167000 | -0.143772000 |
| H | 5.795537000  | 2.052796000  | 0.004857000  |
| H | 5.795537000  | -2.052796000 | -0.004857000 |
| H | 5.898372000  | 5.898372000  | 2.602456000  |
| H | 5.898372000  | -5.898372000 | -2.602456000 |
| H | 6.248658000  | 0.576656000  | 0.874352000  |
| H | 6.248658000  | -0.576656000 | -0.874352000 |
| H | -0.576656000 | 6.248658000  | -0.874352000 |
| H | -0.576656000 | -6.248658000 | 0.874352000  |
| H | -1.840723000 | 5.323970000  | -1.689921000 |
| H | -1.840723000 | -5.323970000 | 1.689921000  |
| H | -2.052796000 | 5.795537000  | -0.004857000 |
| H | -2.052796000 | -5.795537000 | 0.004857000  |
| H | -2.885429000 | 2.885429000  | -3.269870000 |
| H | -2.885429000 | -2.885429000 | 3.269870000  |
| H | -3.966831000 | 3.966831000  | 0.734178000  |

|   |              |              |              |
|---|--------------|--------------|--------------|
| H | -3.966831000 | -3.966831000 | -0.734178000 |
| H | -4.528589000 | 4.528589000  | -4.168490000 |
| H | -4.528589000 | -4.528589000 | 4.168490000  |
| H | -5.323970000 | 1.840723000  | -1.689921000 |
| H | -5.323970000 | -1.840723000 | 1.689921000  |
| H | -5.615167000 | 5.615167000  | -0.143772000 |
| H | -5.615167000 | -5.615167000 | 0.143772000  |
| H | -5.795537000 | 2.052796000  | -0.004857000 |
| H | -5.795537000 | -2.052796000 | 0.004857000  |
| H | -5.898372000 | 5.898372000  | -2.602456000 |
| H | -5.898372000 | -5.898372000 | 2.602456000  |
| H | -6.248658000 | 0.576656000  | -0.874352000 |
| H | -6.248658000 | -0.576656000 | 0.874352000  |
| N | 0.000000000  | 1.979388000  | 0.000000000  |
| N | 0.000000000  | -1.979388000 | 0.000000000  |
| N | 1.979388000  | 0.000000000  | 0.000000000  |
| N | -1.979388000 | 0.000000000  | 0.000000000  |

**43. Ni[Me<sub>3</sub>TPP]; S = 0 (saddled)**

|    |             |              |              |
|----|-------------|--------------|--------------|
| Ni | 0.000000000 | 0.000000000  | 0.000000000  |
| C  | 0.000000000 | 0.000000000  | 3.358514000  |
| C  | 0.000000000 | 0.000000000  | 4.843853000  |
| C  | 0.000000000 | 0.000000000  | 7.655338000  |
| C  | 0.000000000 | 0.000000000  | -3.358514000 |
| C  | 0.000000000 | 0.000000000  | -4.843853000 |
| C  | 0.000000000 | 0.000000000  | -7.655338000 |
| C  | 0.958030000 | 0.736332000  | 6.952658000  |
| C  | 0.958030000 | -0.736332000 | -6.952658000 |
| C  | 0.959502000 | 0.731662000  | 5.558039000  |
| C  | 0.959502000 | -0.731662000 | -5.558039000 |
| C  | 1.106273000 | 0.506669000  | -2.668717000 |
| C  | 1.106273000 | -0.506669000 | 2.668717000  |
| C  | 2.242440000 | 1.222520000  | -3.215763000 |
| C  | 2.242440000 | -1.222520000 | 3.215763000  |
| C  | 2.344126000 | 1.926817000  | -4.535975000 |
| C  | 2.344126000 | -1.926817000 | 4.535975000  |
| C  | 2.668724000 | 0.506731000  | -1.106167000 |
| C  | 2.668724000 | -0.506731000 | 1.106167000  |
| C  | 3.215805000 | 1.222630000  | -2.242230000 |
| C  | 3.215805000 | -1.222630000 | 2.242230000  |
| C  | 3.358567000 | 0.000000000  | 0.000000000  |
| C  | 4.535917000 | 1.927104000  | -2.343632000 |
| C  | 4.535917000 | -1.927104000 | 2.343632000  |
| C  | 4.843918000 | 0.000000000  | 0.000000000  |
| C  | 5.558118000 | 0.731793000  | 0.959394000  |
| C  | 5.558118000 | -0.731793000 | -0.959394000 |
| C  | 6.952743000 | 0.736450000  | 0.957937000  |
| C  | 6.952743000 | -0.736450000 | -0.957937000 |
| C  | 7.655436000 | 0.000000000  | 0.000000000  |



|   |              |              |              |
|---|--------------|--------------|--------------|
| C | -0.958030000 | 0.736332000  | -6.952658000 |
| C | -0.958030000 | -0.736332000 | 6.952658000  |
| C | -0.959502000 | 0.731662000  | -5.558039000 |
| C | -0.959502000 | -0.731662000 | 5.558039000  |
| C | -1.106273000 | 0.506669000  | 2.668717000  |
| C | -1.106273000 | -0.506669000 | -2.668717000 |
| C | -2.242440000 | 1.222520000  | 3.215763000  |
| C | -2.242440000 | -1.222520000 | -3.215763000 |
| C | -2.344126000 | 1.926817000  | 4.535975000  |
| C | -2.344126000 | -1.926817000 | -4.535975000 |
| C | -2.668724000 | 0.506731000  | 1.106167000  |
| C | -2.668724000 | -0.506731000 | -1.106167000 |
| C | -3.215805000 | 1.222630000  | 2.242230000  |
| C | -3.215805000 | -1.222630000 | -2.242230000 |
| C | -3.358567000 | 0.000000000  | 0.000000000  |
| C | -4.535917000 | 1.927104000  | 2.343632000  |
| C | -4.535917000 | -1.927104000 | -2.343632000 |
| C | -4.843918000 | 0.000000000  | 0.000000000  |
| C | -5.558118000 | 0.731793000  | -0.959394000 |
| C | -5.558118000 | -0.731793000 | 0.959394000  |
| C | -6.952743000 | 0.736450000  | -0.957937000 |
| C | -6.952743000 | -0.736450000 | 0.957937000  |
| C | -7.655436000 | 0.000000000  | 0.000000000  |
| H | 0.000000000  | 0.000000000  | 8.744941000  |
| H | 0.000000000  | 0.000000000  | -8.744941000 |
| H | 1.363959000  | 2.232562000  | -4.917912000 |
| H | 1.363959000  | -2.232562000 | 4.917912000  |
| H | 1.705443000  | 1.299741000  | 5.002650000  |
| H | 1.705443000  | -1.299741000 | -5.002650000 |
| H | 1.705793000  | 1.315804000  | 7.493049000  |
| H | 1.705793000  | -1.315804000 | -7.493049000 |
| H | 2.809638000  | 1.298242000  | -5.309699000 |
| H | 2.809638000  | -1.298242000 | 5.309699000  |
| H | 2.965422000  | 2.826689000  | -4.433105000 |
| H | 2.965422000  | -2.826689000 | 4.433105000  |
| H | 4.433142000  | 2.826769000  | -2.965242000 |
| H | 4.433142000  | -2.826769000 | 2.965242000  |
| H | 4.917412000  | 2.233228000  | -1.363400000 |
| H | 4.917412000  | -2.233228000 | 1.363400000  |
| H | 5.002745000  | 1.299887000  | 1.705330000  |
| H | 5.002745000  | -1.299887000 | -1.705330000 |
| H | 5.309940000  | 1.298516000  | -2.808634000 |
| H | 5.309940000  | -1.298516000 | 2.808634000  |
| H | 7.493108000  | 1.315982000  | 1.705668000  |
| H | 7.493108000  | -1.315982000 | -1.705668000 |
| H | 8.745048000  | 0.000000000  | 0.000000000  |
| H | -1.363959000 | 2.232562000  | 4.917912000  |
| H | -1.363959000 | -2.232562000 | -4.917912000 |
| H | -1.705443000 | 1.299741000  | -5.002650000 |
| H | -1.705443000 | -1.299741000 | 5.002650000  |
| H | -1.705793000 | 1.315804000  | -7.493049000 |

|   |              |              |              |
|---|--------------|--------------|--------------|
| H | -1.705793000 | -1.315804000 | 7.493049000  |
| H | -2.809638000 | 1.298242000  | 5.309699000  |
| H | -2.809638000 | -1.298242000 | -5.309699000 |
| H | -2.965422000 | 2.826689000  | 4.433105000  |
| H | -2.965422000 | -2.826689000 | -4.433105000 |
| H | -4.433142000 | 2.826769000  | 2.965242000  |
| H | -4.433142000 | -2.826769000 | -2.965242000 |
| H | -4.917412000 | 2.233228000  | 1.363400000  |
| H | -4.917412000 | -2.233228000 | -1.363400000 |
| H | -5.002745000 | 1.299887000  | -1.705330000 |
| H | -5.002745000 | -1.299887000 | 1.705330000  |
| H | -5.309940000 | 1.298516000  | 2.808634000  |
| H | -5.309940000 | -1.298516000 | -2.808634000 |
| H | -7.493108000 | 1.315982000  | -1.705668000 |
| H | -7.493108000 | -1.315982000 | 1.705668000  |
| H | -8.745048000 | 0.000000000  | 0.000000000  |
| N | 1.338197000  | 0.204529000  | -1.338158000 |
| N | 1.338197000  | -0.204529000 | 1.338158000  |
| N | -1.338197000 | 0.204529000  | 1.338158000  |
| N | -1.338197000 | -0.204529000 | -1.338158000 |

**44. Ni[Me<sub>8</sub>TPP]; S = 0 (ruffled)**

|    |             |              |              |
|----|-------------|--------------|--------------|
| Ni | 0.000000000 | 0.000000000  | 0.000000000  |
| C  | 0.574534000 | 4.099357000  | 0.377605000  |
| C  | 0.574534000 | -4.099357000 | -0.377605000 |
| C  | 0.981193000 | 2.709979000  | 0.521886000  |
| C  | 0.981193000 | -2.709979000 | -0.521886000 |
| C  | 1.214291000 | 5.352698000  | 0.904949000  |
| C  | 1.214291000 | -5.352698000 | -0.904949000 |
| C  | 2.254284000 | 2.254284000  | 0.889949000  |
| C  | 2.254284000 | -2.254284000 | -0.889949000 |
| C  | 2.709979000 | 0.981193000  | 0.521886000  |
| C  | 2.709979000 | -0.981193000 | -0.521886000 |
| C  | 3.208212000 | 3.208212000  | 1.526815000  |
| C  | 3.208212000 | -3.208212000 | -1.526815000 |
| C  | 3.285673000 | 3.285673000  | 2.922164000  |
| C  | 3.285673000 | -3.285673000 | -2.922164000 |
| C  | 4.033849000 | 4.033849000  | 0.755228000  |
| C  | 4.033849000 | -4.033849000 | -0.755228000 |
| C  | 4.099357000 | 0.574534000  | 0.377605000  |
| C  | 4.099357000 | -0.574534000 | -0.377605000 |
| C  | 4.172794000 | 4.172794000  | 3.535672000  |
| C  | 4.172794000 | -4.172794000 | -3.535672000 |
| C  | 4.920836000 | 4.920836000  | 1.363275000  |
| C  | 4.920836000 | -4.920836000 | -1.363275000 |
| C  | 4.993093000 | 4.993093000  | 2.757010000  |
| C  | 4.993093000 | -4.993093000 | -2.757010000 |
| C  | 5.352698000 | 1.214291000  | 0.904949000  |
| C  | 5.352698000 | -1.214291000 | -0.904949000 |

|   |              |              |              |
|---|--------------|--------------|--------------|
| C | -0.574534000 | 4.099357000  | -0.377605000 |
| C | -0.574534000 | -4.099357000 | 0.377605000  |
| C | -0.981193000 | 2.709979000  | -0.521886000 |
| C | -0.981193000 | -2.709979000 | 0.521886000  |
| C | -1.214291000 | 5.352698000  | -0.904949000 |
| C | -1.214291000 | -5.352698000 | 0.904949000  |
| C | -2.254284000 | 2.254284000  | -0.889949000 |
| C | -2.254284000 | -2.254284000 | 0.889949000  |
| C | -2.709979000 | 0.981193000  | -0.521886000 |
| C | -2.709979000 | -0.981193000 | 0.521886000  |
| C | -3.208212000 | 3.208212000  | -1.526815000 |
| C | -3.208212000 | -3.208212000 | 1.526815000  |
| C | -3.285673000 | 3.285673000  | -2.922164000 |
| C | -3.285673000 | -3.285673000 | 2.922164000  |
| C | -4.033849000 | 4.033849000  | -0.755228000 |
| C | -4.033849000 | -4.033849000 | 0.755228000  |
| C | -4.099357000 | 0.574534000  | -0.377605000 |
| C | -4.099357000 | -0.574534000 | 0.377605000  |
| C | -4.172794000 | 4.172794000  | -3.535672000 |
| C | -4.172794000 | -4.172794000 | 3.535672000  |
| C | -4.920836000 | 4.920836000  | -1.363275000 |
| C | -4.920836000 | -4.920836000 | 1.363275000  |
| C | -4.993093000 | 4.993093000  | -2.757010000 |
| C | -4.993093000 | -4.993093000 | 2.757010000  |
| C | -5.352698000 | 1.214291000  | -0.904949000 |
| C | -5.352698000 | -1.214291000 | 0.904949000  |
| H | 0.459826000  | 6.143937000  | 0.992517000  |
| H | 0.459826000  | -6.143937000 | -0.992517000 |
| H | 1.657810000  | 5.207702000  | 1.895583000  |
| H | 1.657810000  | -5.207702000 | -1.895583000 |
| H | 2.013292000  | 5.727668000  | 0.248245000  |
| H | 2.013292000  | -5.727668000 | -0.248245000 |
| H | 2.642665000  | 2.642665000  | 3.522283000  |
| H | 2.642665000  | -2.642665000 | -3.522283000 |
| H | 3.970393000  | 3.970393000  | -0.330674000 |
| H | 3.970393000  | -3.970393000 | 0.330674000  |
| H | 4.223201000  | 4.223201000  | 4.622667000  |
| H | 4.223201000  | -4.223201000 | -4.622667000 |
| H | 5.207702000  | 1.657810000  | 1.895583000  |
| H | 5.207702000  | -1.657810000 | -1.895583000 |
| H | 5.557301000  | 5.557301000  | 0.749527000  |
| H | 5.557301000  | -5.557301000 | -0.749527000 |
| H | 5.685634000  | 5.685634000  | 3.234416000  |
| H | 5.685634000  | -5.685634000 | -3.234416000 |
| H | 5.727668000  | 2.013292000  | 0.248245000  |
| H | 5.727668000  | -2.013292000 | -0.248245000 |
| H | 6.143937000  | 0.459826000  | 0.992517000  |
| H | 6.143937000  | -0.459826000 | -0.992517000 |
| H | -0.459826000 | 6.143937000  | -0.992517000 |
| H | -0.459826000 | -6.143937000 | 0.992517000  |
| H | -1.657810000 | 5.207702000  | -1.895583000 |

|   |              |              |              |
|---|--------------|--------------|--------------|
| H | -1.657810000 | -5.207702000 | 1.895583000  |
| H | -2.013292000 | 5.727668000  | -0.248245000 |
| H | -2.013292000 | -5.727668000 | 0.248245000  |
| H | -2.642665000 | 2.642665000  | -3.522283000 |
| H | -2.642665000 | -2.642665000 | 3.522283000  |
| H | -3.970393000 | 3.970393000  | 0.330674000  |
| H | -3.970393000 | -3.970393000 | -0.330674000 |
| H | -4.223201000 | 4.223201000  | -4.622667000 |
| H | -4.223201000 | -4.223201000 | 4.622667000  |
| H | -5.207702000 | 1.657810000  | -1.895583000 |
| H | -5.207702000 | -1.657810000 | 1.895583000  |
| H | -5.557301000 | 5.557301000  | -0.749527000 |
| H | -5.557301000 | -5.557301000 | 0.749527000  |
| H | -5.685634000 | 5.685634000  | -3.234416000 |
| H | -5.685634000 | -5.685634000 | 3.234416000  |
| H | -5.727668000 | 2.013292000  | -0.248245000 |
| H | -5.727668000 | -2.013292000 | 0.248245000  |
| H | -6.143937000 | 0.459826000  | -0.992517000 |
| H | -6.143937000 | -0.459826000 | 0.992517000  |
| N | 0.000000000  | 1.889557000  | 0.000000000  |
| N | 0.000000000  | -1.889557000 | 0.000000000  |
| N | 1.889557000  | 0.000000000  | 0.000000000  |
| N | -1.889557000 | 0.000000000  | 0.000000000  |

**45. Pd[Me<sub>8</sub>TPP]; S = 0 (saddled)**

|    |             |              |              |
|----|-------------|--------------|--------------|
| Pd | 0.000000000 | 0.000000000  | 0.000000000  |
| C  | 0.000000000 | 0.000000000  | 3.408516000  |
| C  | 0.000000000 | 0.000000000  | 4.895752000  |
| C  | 0.000000000 | 0.000000000  | 7.706414000  |
| C  | 0.000000000 | 0.000000000  | -3.408516000 |
| C  | 0.000000000 | 0.000000000  | -4.895752000 |
| C  | 0.000000000 | 0.000000000  | -7.706414000 |
| C  | 0.879250000 | 0.828926000  | 7.003850000  |
| C  | 0.879250000 | -0.828926000 | -7.003850000 |
| C  | 0.881830000 | 0.823573000  | 5.609379000  |
| C  | 0.881830000 | -0.823573000 | -5.609379000 |
| C  | 1.171232000 | 0.407341000  | -2.746648000 |
| C  | 1.171232000 | -0.407341000 | 2.746648000  |
| C  | 2.342781000 | 1.056073000  | -3.317305000 |
| C  | 2.342781000 | -1.056073000 | 3.317305000  |
| C  | 2.475498000 | 1.719912000  | -4.656386000 |
| C  | 2.475498000 | -1.719912000 | 4.656386000  |
| C  | 2.746738000 | 0.407228000  | -1.171293000 |
| C  | 2.746738000 | -0.407228000 | 1.171293000  |
| C  | 3.317356000 | 1.055810000  | -2.342958000 |
| C  | 3.317356000 | -1.055810000 | 2.342958000  |
| C  | 3.408632000 | 0.000000000  | 0.000000000  |
| C  | 4.656514000 | 1.719519000  | -2.475791000 |
| C  | 4.656514000 | -1.719519000 | 2.475791000  |

|   |              |              |              |
|---|--------------|--------------|--------------|
| C | 4.895859000  | 0.000000000  | 0.000000000  |
| C | 5.609506000  | 0.824054000  | 0.881379000  |
| C | 5.609506000  | -0.824054000 | -0.881379000 |
| C | 7.003979000  | 0.829478000  | 0.878728000  |
| C | 7.003979000  | -0.829478000 | -0.878728000 |
| C | 7.706553000  | 0.000000000  | 0.000000000  |
| C | -0.879250000 | 0.828926000  | -7.003850000 |
| C | -0.879250000 | -0.828926000 | 7.003850000  |
| C | -0.881830000 | 0.823573000  | -5.609379000 |
| C | -0.881830000 | -0.823573000 | 5.609379000  |
| C | -1.171232000 | 0.407341000  | 2.746648000  |
| C | -1.171232000 | -0.407341000 | -2.746648000 |
| C | -2.342781000 | 1.056073000  | 3.317305000  |
| C | -2.342781000 | -1.056073000 | -3.317305000 |
| C | -2.475498000 | 1.719912000  | 4.656386000  |
| C | -2.475498000 | -1.719912000 | -4.656386000 |
| C | -2.746738000 | 0.407228000  | 1.171293000  |
| C | -2.746738000 | -0.407228000 | -1.171293000 |
| C | -3.317356000 | 1.055810000  | 2.342958000  |
| C | -3.317356000 | -1.055810000 | -2.342958000 |
| C | -3.408632000 | 0.000000000  | 0.000000000  |
| C | -4.656514000 | 1.719519000  | 2.475791000  |
| C | -4.656514000 | -1.719519000 | -2.475791000 |
| C | -4.895859000 | 0.000000000  | 0.000000000  |
| C | -5.609506000 | 0.824054000  | -0.881379000 |
| C | -5.609506000 | -0.824054000 | 0.881379000  |
| C | -7.003979000 | 0.829478000  | -0.878728000 |
| C | -7.003979000 | -0.829478000 | 0.878728000  |
| C | -7.706553000 | 0.000000000  | 0.000000000  |
| H | 0.000000000  | 0.000000000  | 8.796013000  |
| H | 0.000000000  | 0.000000000  | -8.796013000 |
| H | 1.516671000  | 2.099122000  | -5.026463000 |
| H | 1.516671000  | -2.099122000 | 5.026463000  |
| H | 1.565030000  | 1.480597000  | 7.544094000  |
| H | 1.565030000  | -1.480597000 | -7.544094000 |
| H | 1.567557000  | 1.462715000  | 5.053689000  |
| H | 1.567557000  | -1.462715000 | -5.053689000 |
| H | 2.868401000  | 1.037256000  | -5.424331000 |
| H | 2.868401000  | -1.037256000 | 5.424331000  |
| H | 3.171171000  | 2.566362000  | -4.589465000 |
| H | 3.171171000  | -2.566362000 | 4.589465000  |
| H | 4.589224000  | 2.566840000  | -3.170379000 |
| H | 4.589224000  | -2.566840000 | 3.170379000  |
| H | 5.027302000  | 2.097506000  | -1.516758000 |
| H | 5.027302000  | -2.097506000 | 1.516758000  |
| H | 5.053827000  | 1.463534000  | 1.566793000  |
| H | 5.053827000  | -1.463534000 | -1.566793000 |
| H | 5.424048000  | 1.037181000  | -2.870061000 |
| H | 5.424048000  | -1.037181000 | 2.870061000  |
| H | 7.544220000  | 1.481542000  | 1.564143000  |
| H | 7.544220000  | -1.481542000 | -1.564143000 |

|   |              |              |              |
|---|--------------|--------------|--------------|
| H | 8.796163000  | 0.000000000  | 0.000000000  |
| H | -1.516671000 | 2.099122000  | 5.026463000  |
| H | -1.516671000 | -2.099122000 | -5.026463000 |
| H | -1.565030000 | 1.480597000  | -7.544094000 |
| H | -1.565030000 | -1.480597000 | 7.544094000  |
| H | -1.567557000 | 1.462715000  | -5.053689000 |
| H | -1.567557000 | -1.462715000 | 5.053689000  |
| H | -2.868401000 | 1.037256000  | 5.424331000  |
| H | -2.868401000 | -1.037256000 | -5.424331000 |
| H | -3.171171000 | 2.566362000  | 4.589465000  |
| H | -3.171171000 | -2.566362000 | -4.589465000 |
| H | -4.589224000 | 2.566840000  | 3.170379000  |
| H | -4.589224000 | -2.566840000 | -3.170379000 |
| H | -5.027302000 | 2.097506000  | 1.516758000  |
| H | -5.027302000 | -2.097506000 | -1.516758000 |
| H | -5.053827000 | 1.463534000  | -1.566793000 |
| H | -5.053827000 | -1.463534000 | 1.566793000  |
| H | -5.424048000 | 1.037181000  | 2.870061000  |
| H | -5.424048000 | -1.037181000 | -2.870061000 |
| H | -7.544220000 | 1.481542000  | -1.564143000 |
| H | -7.544220000 | -1.481542000 | 1.564143000  |
| H | -8.796163000 | 0.000000000  | 0.000000000  |
| N | 1.420043000  | 0.119909000  | -1.419994000 |
| N | 1.420043000  | -0.119909000 | 1.419994000  |
| N | -1.420043000 | 0.119909000  | 1.419994000  |
| N | -1.420043000 | -0.119909000 | -1.419994000 |

**46. Pd[Me<sub>3</sub>TPP]; S = 0 (ruffled)**

|    |             |              |              |
|----|-------------|--------------|--------------|
| Pd | 0.000000000 | 0.000000000  | 0.000000000  |
| C  | 0.633368000 | 4.217948000  | 0.267672000  |
| C  | 0.633368000 | -4.217948000 | -0.267672000 |
| C  | 1.058619000 | 2.823653000  | 0.358838000  |
| C  | 1.058619000 | -2.823653000 | -0.358838000 |
| C  | 1.353190000 | 5.478723000  | 0.659304000  |
| C  | 1.353190000 | -5.478723000 | -0.659304000 |
| C  | 2.363179000 | 2.363179000  | 0.608227000  |
| C  | 2.363179000 | -2.363179000 | -0.608227000 |
| C  | 2.823653000 | 1.058619000  | 0.358838000  |
| C  | 2.823653000 | -1.058619000 | -0.358838000 |
| C  | 3.367172000 | 3.367172000  | 1.073703000  |
| C  | 3.367172000 | -3.367172000 | -1.073703000 |
| C  | 3.565773000 | 3.565773000  | 2.445106000  |
| C  | 3.565773000 | -3.565773000 | -2.445106000 |
| C  | 4.117789000 | 4.117789000  | 0.163428000  |
| C  | 4.117789000 | -4.117789000 | -0.163428000 |
| C  | 4.217948000 | 0.633368000  | 0.267672000  |
| C  | 4.217948000 | -0.633368000 | -0.267672000 |
| C  | 4.499255000 | 4.499255000  | 2.898738000  |
| C  | 4.499255000 | -4.499255000 | -2.898738000 |

|   |              |              |              |
|---|--------------|--------------|--------------|
| C | 5.051526000  | 5.051526000  | 0.611904000  |
| C | 5.051526000  | -5.051526000 | -0.611904000 |
| C | 5.245138000  | 5.245138000  | 1.981884000  |
| C | 5.245138000  | -5.245138000 | -1.981884000 |
| C | 5.478723000  | 1.353190000  | 0.659304000  |
| C | 5.478723000  | -1.353190000 | -0.659304000 |
| C | -0.633368000 | 4.217948000  | -0.267672000 |
| C | -0.633368000 | -4.217948000 | 0.267672000  |
| C | -1.058619000 | 2.823653000  | -0.358838000 |
| C | -1.058619000 | -2.823653000 | 0.358838000  |
| C | -1.353190000 | 5.478723000  | -0.659304000 |
| C | -1.353190000 | -5.478723000 | 0.659304000  |
| C | -2.363179000 | 2.363179000  | -0.608227000 |
| C | -2.363179000 | -2.363179000 | 0.608227000  |
| C | -2.823653000 | 1.058619000  | -0.358838000 |
| C | -2.823653000 | -1.058619000 | 0.358838000  |
| C | -3.367172000 | 3.367172000  | -1.073703000 |
| C | -3.367172000 | -3.367172000 | 1.073703000  |
| C | -3.565773000 | 3.565773000  | -2.445106000 |
| C | -3.565773000 | -3.565773000 | 2.445106000  |
| C | -4.117789000 | 4.117789000  | -0.163428000 |
| C | -4.117789000 | -4.117789000 | 0.163428000  |
| C | -4.217948000 | 0.633368000  | -0.267672000 |
| C | -4.217948000 | -0.633368000 | 0.267672000  |
| C | -4.499255000 | 4.499255000  | -2.898738000 |
| C | -4.499255000 | -4.499255000 | 2.898738000  |
| C | -5.051526000 | 5.051526000  | -0.611904000 |
| C | -5.051526000 | -5.051526000 | 0.611904000  |
| C | -5.245138000 | 5.245138000  | -1.981884000 |
| C | -5.245138000 | -5.245138000 | 1.981884000  |
| C | -5.478723000 | 1.353190000  | -0.659304000 |
| C | -5.478723000 | -1.353190000 | 0.659304000  |
| H | 0.630542000  | 6.289868000  | 0.801918000  |
| H | 0.630542000  | -6.289868000 | -0.801918000 |
| H | 1.907869000  | 5.368602000  | 1.596593000  |
| H | 1.907869000  | -5.368602000 | -1.596593000 |
| H | 2.075471000  | 5.806148000  | -0.102533000 |
| H | 2.075471000  | -5.806148000 | 0.102533000  |
| H | 2.979841000  | 2.979841000  | 3.152581000  |
| H | 2.979841000  | -2.979841000 | -3.152581000 |
| H | 3.960035000  | 3.960035000  | -0.903118000 |
| H | 3.960035000  | -3.960035000 | 0.903118000  |
| H | 4.644552000  | 4.644552000  | 3.968459000  |
| H | 4.644552000  | -4.644552000 | -3.968459000 |
| H | 5.368602000  | 1.907869000  | 1.596593000  |
| H | 5.368602000  | -1.907869000 | -1.596593000 |
| H | 5.629436000  | 5.629436000  | -0.108456000 |
| H | 5.629436000  | -5.629436000 | 0.108456000  |
| H | 5.806148000  | 2.075471000  | -0.102533000 |
| H | 5.806148000  | -2.075471000 | 0.102533000  |
| H | 5.974184000  | 5.974184000  | 2.334174000  |

|   |              |              |              |
|---|--------------|--------------|--------------|
| H | 5.974184000  | -5.974184000 | -2.334174000 |
| H | 6.289868000  | 0.630542000  | 0.801918000  |
| H | 6.289868000  | -0.630542000 | -0.801918000 |
| H | -0.630542000 | 6.289868000  | -0.801918000 |
| H | -0.630542000 | -6.289868000 | 0.801918000  |
| H | -1.907869000 | 5.368602000  | -1.596593000 |
| H | -1.907869000 | -5.368602000 | 1.596593000  |
| H | -2.075471000 | 5.806148000  | 0.102533000  |
| H | -2.075471000 | -5.806148000 | -0.102533000 |
| H | -2.979841000 | 2.979841000  | -3.152581000 |
| H | -2.979841000 | -2.979841000 | 3.152581000  |
| H | -3.960035000 | 3.960035000  | 0.903118000  |
| H | -3.960035000 | -3.960035000 | -0.903118000 |
| H | -4.644552000 | 4.644552000  | -3.968459000 |
| H | -4.644552000 | -4.644552000 | 3.968459000  |
| H | -5.368602000 | 1.907869000  | -1.596593000 |
| H | -5.368602000 | -1.907869000 | 1.596593000  |
| H | -5.629436000 | 5.629436000  | 0.108456000  |
| H | -5.629436000 | -5.629436000 | -0.108456000 |
| H | -5.806148000 | 2.075471000  | 0.102533000  |
| H | -5.806148000 | -2.075471000 | -0.102533000 |
| H | -5.974184000 | 5.974184000  | -2.334174000 |
| H | -5.974184000 | -5.974184000 | 2.334174000  |
| H | -6.289868000 | 0.630542000  | -0.801918000 |
| H | -6.289868000 | -0.630542000 | 0.801918000  |
| N | 0.000000000  | 2.014030000  | 0.000000000  |
| N | 0.000000000  | -2.014030000 | 0.000000000  |
| N | 2.014030000  | 0.000000000  | 0.000000000  |
| N | -2.014030000 | 0.000000000  | 0.000000000  |

**47. Pt[Me<sub>8</sub>TPP]; S = 0 (saddled)**

|    |             |              |              |
|----|-------------|--------------|--------------|
| Pt | 0.000000000 | 0.000000000  | 0.000000000  |
| C  | 0.000000000 | 0.000000000  | 3.411643000  |
| C  | 0.000000000 | 0.000000000  | 4.900280000  |
| C  | 0.000000000 | 0.000000000  | 7.710689000  |
| C  | 0.000000000 | 0.000000000  | -3.411643000 |
| C  | 0.000000000 | 0.000000000  | -4.900280000 |
| C  | 0.000000000 | 0.000000000  | -7.710689000 |
| C  | 0.850806000 | 0.858049000  | 7.008159000  |
| C  | 0.850806000 | -0.858049000 | -7.008159000 |
| C  | 0.853554000 | 0.852715000  | 5.613559000  |
| C  | 0.853554000 | -0.852715000 | -5.613559000 |
| C  | 1.175408000 | 0.401009000  | -2.753878000 |
| C  | 1.175408000 | -0.401009000 | 2.753878000  |
| C  | 2.357617000 | 1.020370000  | -3.331254000 |
| C  | 2.357617000 | -1.020370000 | 3.331254000  |
| C  | 2.504344000 | 1.659069000  | -4.680889000 |
| C  | 2.504344000 | -1.659069000 | 4.680889000  |
| C  | 2.754112000 | 0.401200000  | -1.175147000 |



|   |              |              |              |
|---|--------------|--------------|--------------|
| C | 2.754112000  | -0.401200000 | 1.175147000  |
| C | 3.331429000  | 1.020835000  | -2.357169000 |
| C | 3.331429000  | -1.020835000 | 2.357169000  |
| C | 3.412037000  | 0.000000000  | 0.000000000  |
| C | 4.680988000  | 1.659801000  | -2.503540000 |
| C | 4.680988000  | -1.659801000 | 2.503540000  |
| C | 4.900677000  | 0.000000000  | 0.000000000  |
| C | 5.614020000  | 0.852268000  | 0.854022000  |
| C | 5.614020000  | -0.852268000 | -0.854022000 |
| C | 7.008615000  | 0.857676000  | 0.851156000  |
| C | 7.008615000  | -0.857676000 | -0.851156000 |
| C | 7.711144000  | 0.000000000  | 0.000000000  |
| C | -0.850806000 | 0.858049000  | -7.008159000 |
| C | -0.850806000 | -0.858049000 | 7.008159000  |
| C | -0.853554000 | 0.852715000  | -5.613559000 |
| C | -0.853554000 | -0.852715000 | 5.613559000  |
| C | -1.175408000 | 0.401009000  | 2.753878000  |
| C | -1.175408000 | -0.401009000 | -2.753878000 |
| C | -2.357617000 | 1.020370000  | 3.331254000  |
| C | -2.357617000 | -1.020370000 | -3.331254000 |
| C | -2.504344000 | 1.659069000  | 4.680889000  |
| C | -2.504344000 | -1.659069000 | -4.680889000 |
| C | -2.754112000 | 0.401200000  | 1.175147000  |
| C | -2.754112000 | -0.401200000 | -1.175147000 |
| C | -3.331429000 | 1.020835000  | 2.357169000  |
| C | -3.331429000 | -1.020835000 | -2.357169000 |
| C | -3.412037000 | 0.000000000  | 0.000000000  |
| C | -4.680988000 | 1.659801000  | 2.503540000  |
| C | -4.680988000 | -1.659801000 | -2.503540000 |
| C | -4.900677000 | 0.000000000  | 0.000000000  |
| C | -5.614020000 | 0.852268000  | -0.854022000 |
| C | -5.614020000 | -0.852268000 | 0.854022000  |
| C | -7.008615000 | 0.857676000  | -0.851156000 |
| C | -7.008615000 | -0.857676000 | 0.851156000  |
| C | -7.711144000 | 0.000000000  | 0.000000000  |
| H | 0.000000000  | 0.000000000  | 8.800302000  |
| H | 0.000000000  | 0.000000000  | -8.800302000 |
| H | 1.514478000  | 1.532205000  | 7.548451000  |
| H | 1.514478000  | -1.532205000 | -7.548451000 |
| H | 1.517631000  | 1.514276000  | 5.057821000  |
| H | 1.517631000  | -1.514276000 | -5.057821000 |
| H | 1.555580000  | 2.059236000  | -5.054208000 |
| H | 1.555580000  | -2.059236000 | 5.054208000  |
| H | 2.875889000  | 0.954412000  | -5.439391000 |
| H | 2.875889000  | -0.954412000 | 5.439391000  |
| H | 3.222968000  | 2.486891000  | -4.628804000 |
| H | 3.222968000  | -2.486891000 | 4.628804000  |
| H | 4.629080000  | 2.487572000  | -3.222234000 |
| H | 4.629080000  | -2.487572000 | 3.222234000  |
| H | 5.053857000  | 2.060102000  | -1.554625000 |
| H | 5.053857000  | -2.060102000 | 1.554625000  |

|   |              |              |              |
|---|--------------|--------------|--------------|
| H | 5.058501000  | 1.513509000  | 1.518666000  |
| H | 5.058501000  | -1.513509000 | -1.518666000 |
| H | 5.439821000  | 0.955298000  | -2.874696000 |
| H | 5.439821000  | -0.955298000 | 2.874696000  |
| H | 7.548890000  | 1.531404000  | 1.515245000  |
| H | 7.548890000  | -1.531404000 | -1.515245000 |
| H | 8.800744000  | 0.000000000  | 0.000000000  |
| H | -1.514478000 | 1.532205000  | -7.548451000 |
| H | -1.514478000 | -1.532205000 | 7.548451000  |
| H | -1.517631000 | 1.514276000  | -5.057821000 |
| H | -1.517631000 | -1.514276000 | 5.057821000  |
| H | -1.555580000 | 2.059236000  | 5.054208000  |
| H | -1.555580000 | -2.059236000 | -5.054208000 |
| H | -2.875889000 | 0.954412000  | 5.439391000  |
| H | -2.875889000 | -0.954412000 | -5.439391000 |
| H | -3.222968000 | 2.486891000  | 4.628804000  |
| H | -3.222968000 | -2.486891000 | -4.628804000 |
| H | -4.629080000 | 2.487572000  | 3.222234000  |
| H | -4.629080000 | -2.487572000 | -3.222234000 |
| H | -5.053857000 | 2.060102000  | 1.554625000  |
| H | -5.053857000 | -2.060102000 | -1.554625000 |
| H | -5.058501000 | 1.513509000  | -1.518666000 |
| H | -5.058501000 | -1.513509000 | 1.518666000  |
| H | -5.439821000 | 0.955298000  | 2.874696000  |
| H | -5.439821000 | -0.955298000 | -2.874696000 |
| H | -7.548890000 | 1.531404000  | -1.515245000 |
| H | -7.548890000 | -1.531404000 | 1.515245000  |
| H | -8.800744000 | 0.000000000  | 0.000000000  |
| N | 1.417844000  | 0.140231000  | -1.417594000 |
| N | 1.417844000  | -0.140231000 | 1.417594000  |
| N | -1.417844000 | 0.140231000  | 1.417594000  |
| N | -1.417844000 | -0.140231000 | -1.417594000 |

**48. Pt[Me<sub>3</sub>TPP]; S = 0 (ruffled)**

|    |             |              |              |
|----|-------------|--------------|--------------|
| Pt | 0.000000000 | 0.000000000  | 0.000000000  |
| C  | 0.634693000 | 4.218585000  | 0.263798000  |
| C  | 0.634693000 | -4.218585000 | -0.263798000 |
| C  | 1.061805000 | 2.827339000  | 0.354388000  |
| C  | 1.061805000 | -2.827339000 | -0.354388000 |
| C  | 1.357190000 | 5.479358000  | 0.649570000  |
| C  | 1.357190000 | -5.479358000 | -0.649570000 |
| C  | 2.366252000 | 2.366252000  | 0.601585000  |
| C  | 2.366252000 | -2.366252000 | -0.601585000 |
| C  | 2.827339000 | 1.061805000  | 0.354388000  |
| C  | 2.827339000 | -1.061805000 | -0.354388000 |
| C  | 3.369837000 | 3.369837000  | 1.069749000  |
| C  | 3.369837000 | -3.369837000 | -1.069749000 |
| C  | 3.565445000 | 3.565445000  | 2.442074000  |
| C  | 3.565445000 | -3.565445000 | -2.442074000 |

|   |              |              |              |
|---|--------------|--------------|--------------|
| C | 4.122281000  | 4.122281000  | 0.162480000  |
| C | 4.122281000  | -4.122281000 | -0.162480000 |
| C | 4.218585000  | 0.634693000  | 0.263798000  |
| C | 4.218585000  | -0.634693000 | -0.263798000 |
| C | 4.497974000  | 4.497974000  | 2.899647000  |
| C | 4.497974000  | -4.497974000 | -2.899647000 |
| C | 5.055038000  | 5.055038000  | 0.615069000  |
| C | 5.055038000  | -5.055038000 | -0.615069000 |
| C | 5.245740000  | 5.245740000  | 1.985894000  |
| C | 5.245740000  | -5.245740000 | -1.985894000 |
| C | 5.479358000  | 1.357190000  | 0.649570000  |
| C | 5.479358000  | -1.357190000 | -0.649570000 |
| C | -0.634693000 | 4.218585000  | -0.263798000 |
| C | -0.634693000 | -4.218585000 | 0.263798000  |
| C | -1.061805000 | 2.827339000  | -0.354388000 |
| C | -1.061805000 | -2.827339000 | 0.354388000  |
| C | -1.357190000 | 5.479358000  | -0.649570000 |
| C | -1.357190000 | -5.479358000 | 0.649570000  |
| C | -2.366252000 | 2.366252000  | -0.601585000 |
| C | -2.366252000 | -2.366252000 | 0.601585000  |
| C | -2.827339000 | 1.061805000  | -0.354388000 |
| C | -2.827339000 | -1.061805000 | 0.354388000  |
| C | -3.369837000 | 3.369837000  | -1.069749000 |
| C | -3.369837000 | -3.369837000 | 1.069749000  |
| C | -3.565445000 | 3.565445000  | -2.442074000 |
| C | -3.565445000 | -3.565445000 | 2.442074000  |
| C | -4.122281000 | 4.122281000  | -0.162480000 |
| C | -4.122281000 | -4.122281000 | 0.162480000  |
| C | -4.218585000 | 0.634693000  | -0.263798000 |
| C | -4.218585000 | -0.634693000 | 0.263798000  |
| C | -4.497974000 | 4.497974000  | -2.899647000 |
| C | -4.497974000 | -4.497974000 | 2.899647000  |
| C | -5.055038000 | 5.055038000  | -0.615069000 |
| C | -5.055038000 | -5.055038000 | 0.615069000  |
| C | -5.245740000 | 5.245740000  | -1.985894000 |
| C | -5.245740000 | -5.245740000 | 1.985894000  |
| C | -5.479358000 | 1.357190000  | -0.649570000 |
| C | -5.479358000 | -1.357190000 | 0.649570000  |
| H | 0.636156000  | 6.291728000  | 0.792676000  |
| H | 0.636156000  | -6.291728000 | -0.792676000 |
| H | 1.914961000  | 5.371206000  | 1.585172000  |
| H | 1.914961000  | -5.371206000 | -1.585172000 |
| H | 2.077142000  | 5.803847000  | -0.115679000 |
| H | 2.077142000  | -5.803847000 | 0.115679000  |
| H | 2.977869000  | 2.977869000  | 3.146821000  |
| H | 2.977869000  | -2.977869000 | -3.146821000 |
| H | 3.966708000  | 3.966708000  | -0.904715000 |
| H | 3.966708000  | -3.966708000 | 0.904715000  |
| H | 4.641079000  | 4.641079000  | 3.969975000  |
| H | 4.641079000  | -4.641079000 | -3.969975000 |
| H | 5.371206000  | 1.914961000  | 1.585172000  |

|   |              |              |              |
|---|--------------|--------------|--------------|
| H | 5.371206000  | -1.914961000 | -1.585172000 |
| H | 5.634501000  | 5.634501000  | -0.102697000 |
| H | 5.634501000  | -5.634501000 | 0.102697000  |
| H | 5.803847000  | 2.077142000  | -0.115679000 |
| H | 5.803847000  | -2.077142000 | 0.115679000  |
| H | 5.974045000  | 5.974045000  | 2.341298000  |
| H | 5.974045000  | -5.974045000 | -2.341298000 |
| H | 6.291728000  | 0.636156000  | 0.792676000  |
| H | 6.291728000  | -0.636156000 | -0.792676000 |
| H | -0.636156000 | 6.291728000  | -0.792676000 |
| H | -0.636156000 | -6.291728000 | 0.792676000  |
| H | -1.914961000 | 5.371206000  | -1.585172000 |
| H | -1.914961000 | -5.371206000 | 1.585172000  |
| H | -2.077142000 | 5.803847000  | 0.115679000  |
| H | -2.077142000 | -5.803847000 | -0.115679000 |
| H | -2.977869000 | 2.977869000  | -3.146821000 |
| H | -2.977869000 | -2.977869000 | 3.146821000  |
| H | -3.966708000 | 3.966708000  | 0.904715000  |
| H | -3.966708000 | -3.966708000 | -0.904715000 |
| H | -4.641079000 | 4.641079000  | -3.969975000 |
| H | -4.641079000 | -4.641079000 | 3.969975000  |
| H | -5.371206000 | 1.914961000  | -1.585172000 |
| H | -5.371206000 | -1.914961000 | 1.585172000  |
| H | -5.634501000 | 5.634501000  | 0.102697000  |
| H | -5.634501000 | -5.634501000 | -0.102697000 |
| H | -5.803847000 | 2.077142000  | 0.115679000  |
| H | -5.803847000 | -2.077142000 | -0.115679000 |
| H | -5.974045000 | 5.974045000  | -2.341298000 |
| H | -5.974045000 | -5.974045000 | 2.341298000  |
| H | -6.291728000 | 0.636156000  | -0.792676000 |
| H | -6.291728000 | -0.636156000 | 0.792676000  |
| N | 0.000000000  | 2.015082000  | 0.000000000  |
| N | 0.000000000  | -2.015082000 | 0.000000000  |
| N | 2.015082000  | 0.000000000  | 0.000000000  |
| N | -2.015082000 | 0.000000000  | 0.000000000  |

**49. Zn[Me<sub>8</sub>TPP]; S = 0 (saddled)**

|    |             |              |              |
|----|-------------|--------------|--------------|
| Zn | 0.000000000 | 0.000000000  | 0.000000000  |
| C  | 0.000000000 | 0.000000000  | 3.417965000  |
| C  | 0.000000000 | 0.000000000  | 4.904525000  |
| C  | 0.000000000 | 0.000000000  | 7.716857000  |
| C  | 0.000000000 | 0.000000000  | -3.417965000 |
| C  | 0.000000000 | 0.000000000  | -4.904525000 |
| C  | 0.000000000 | 0.000000000  | -7.716857000 |
| C  | 0.874747000 | 0.833509000  | 7.013986000  |
| C  | 0.874747000 | -0.833509000 | -7.013986000 |
| C  | 0.876930000 | 0.828548000  | 5.619653000  |
| C  | 0.876930000 | -0.828548000 | -5.619653000 |
| C  | 1.190130000 | 0.383817000  | -2.760204000 |

|   |              |              |              |
|---|--------------|--------------|--------------|
| C | 1.190130000  | -0.383817000 | 2.760204000  |
| C | 2.364729000  | 1.018117000  | -3.340986000 |
| C | 2.364729000  | -1.018117000 | 3.340986000  |
| C | 2.510011000  | 1.675298000  | -4.682232000 |
| C | 2.510011000  | -1.675298000 | 4.682232000  |
| C | 2.760153000  | 0.383921000  | -1.190115000 |
| C | 2.760153000  | -0.383921000 | 1.190115000  |
| C | 3.340991000  | 1.018081000  | -2.364794000 |
| C | 3.340991000  | -1.018081000 | 2.364794000  |
| C | 3.417891000  | 0.000000000  | 0.000000000  |
| C | 4.682210000  | 1.675298000  | -2.510189000 |
| C | 4.682210000  | -1.675298000 | 2.510189000  |
| C | 4.904435000  | 0.000000000  | 0.000000000  |
| C | 5.619552000  | 0.828424000  | 0.877051000  |
| C | 5.619552000  | -0.828424000 | -0.877051000 |
| C | 7.013878000  | 0.833579000  | 0.874680000  |
| C | 7.013878000  | -0.833579000 | -0.874680000 |
| C | 7.716738000  | 0.000000000  | 0.000000000  |
| C | -0.874747000 | 0.833509000  | -7.013986000 |
| C | -0.874747000 | -0.833509000 | 7.013986000  |
| C | -0.876930000 | 0.828548000  | -5.619653000 |
| C | -0.876930000 | -0.828548000 | 5.619653000  |
| C | -1.190130000 | 0.383817000  | 2.760204000  |
| C | -1.190130000 | -0.383817000 | -2.760204000 |
| C | -2.364729000 | 1.018117000  | 3.340986000  |
| C | -2.364729000 | -1.018117000 | -3.340986000 |
| C | -2.510011000 | 1.675298000  | 4.682232000  |
| C | -2.510011000 | -1.675298000 | -4.682232000 |
| C | -2.760153000 | 0.383921000  | 1.190115000  |
| C | -2.760153000 | -0.383921000 | -1.190115000 |
| C | -3.340991000 | 1.018081000  | 2.364794000  |
| C | -3.340991000 | -1.018081000 | -2.364794000 |
| C | -3.417891000 | 0.000000000  | 0.000000000  |
| C | -4.682210000 | 1.675298000  | 2.510189000  |
| C | -4.682210000 | -1.675298000 | -2.510189000 |
| C | -4.904435000 | 0.000000000  | 0.000000000  |
| C | -5.619552000 | 0.828424000  | -0.877051000 |
| C | -5.619552000 | -0.828424000 | 0.877051000  |
| C | -7.013878000 | 0.833579000  | -0.874680000 |
| C | -7.013878000 | -0.833579000 | 0.874680000  |
| C | -7.716738000 | 0.000000000  | 0.000000000  |
| H | 0.000000000  | 0.000000000  | 8.806473000  |
| H | 0.000000000  | 0.000000000  | -8.806473000 |
| H | 1.552899000  | 2.037870000  | -5.072085000 |
| H | 1.552899000  | -2.037870000 | 5.072085000  |
| H | 1.556920000  | 1.489027000  | 7.554209000  |
| H | 1.556920000  | -1.489027000 | -7.554209000 |
| H | 1.558536000  | 1.472411000  | 5.064433000  |
| H | 1.558536000  | -1.472411000 | -5.064433000 |
| H | 2.926421000  | 0.992230000  | -5.437380000 |
| H | 2.926421000  | -0.992230000 | 5.437380000  |

|   |              |              |              |
|---|--------------|--------------|--------------|
| H | 3.193224000  | 2.531885000  | -4.610640000 |
| H | 3.193224000  | -2.531885000 | 4.610640000  |
| H | 4.610270000  | 2.532533000  | -3.192554000 |
| H | 4.610270000  | -2.532533000 | 3.192554000  |
| H | 5.064363000  | 1.472340000  | 1.558635000  |
| H | 5.064363000  | -1.472340000 | -1.558635000 |
| H | 5.072611000  | 2.036991000  | -1.552984000 |
| H | 5.072611000  | -2.036991000 | 1.552984000  |
| H | 5.437072000  | 0.992564000  | -2.927686000 |
| H | 5.437072000  | -0.992564000 | 2.927686000  |
| H | 7.554081000  | 1.489148000  | 1.556833000  |
| H | 7.554081000  | -1.489148000 | -1.556833000 |
| H | 8.806330000  | 0.000000000  | 0.000000000  |
| H | -1.552899000 | 2.037870000  | 5.072085000  |
| H | -1.552899000 | -2.037870000 | -5.072085000 |
| H | -1.556920000 | 1.489027000  | -7.554209000 |
| H | -1.556920000 | -1.489027000 | 7.554209000  |
| H | -1.558536000 | 1.472411000  | -5.064433000 |
| H | -1.558536000 | -1.472411000 | 5.064433000  |
| H | -2.926421000 | 0.992230000  | 5.437380000  |
| H | -2.926421000 | -0.992230000 | -5.437380000 |
| H | -3.193224000 | 2.531885000  | 4.610640000  |
| H | -3.193224000 | -2.531885000 | -4.610640000 |
| H | -4.610270000 | 2.532533000  | 3.192554000  |
| H | -4.610270000 | -2.532533000 | -3.192554000 |
| H | -5.064363000 | 1.472340000  | -1.558635000 |
| H | -5.064363000 | -1.472340000 | 1.558635000  |
| H | -5.072611000 | 2.036991000  | 1.552984000  |
| H | -5.072611000 | -2.036991000 | -1.552984000 |
| H | -5.437072000 | 0.992564000  | 2.927686000  |
| H | -5.437072000 | -0.992564000 | -2.927686000 |
| H | -7.554081000 | 1.489148000  | -1.556833000 |
| H | -7.554081000 | -1.489148000 | 1.556833000  |
| H | -8.806330000 | 0.000000000  | 0.000000000  |
| N | 1.435783000  | 0.101449000  | -1.435812000 |
| N | 1.435783000  | -0.101449000 | 1.435812000  |
| N | -1.435783000 | 0.101449000  | 1.435812000  |
| N | -1.435783000 | -0.101449000 | -1.435812000 |

**50. Zn[Me<sub>8</sub>TPP]; S = 0 (ruffled)**

|    |             |              |              |
|----|-------------|--------------|--------------|
| Zn | 0.000000000 | 0.000000000  | 0.000000000  |
| C  | 0.648891000 | 4.249393000  | 0.230472000  |
| C  | 0.648891000 | -4.249393000 | -0.230472000 |
| C  | 1.072313000 | 2.853073000  | 0.302595000  |
| C  | 1.072313000 | -2.853073000 | -0.302595000 |
| C  | 1.387611000 | 5.513552000  | 0.574172000  |
| C  | 1.387611000 | -5.513552000 | -0.574172000 |
| C  | 2.387508000 | 2.387508000  | 0.516516000  |
| C  | 2.387508000 | -2.387508000 | -0.516516000 |

|   |              |              |              |
|---|--------------|--------------|--------------|
| C | 2.853073000  | 1.072313000  | 0.302595000  |
| C | 2.853073000  | -1.072313000 | -0.302595000 |
| C | 3.404237000  | 3.404237000  | 0.925167000  |
| C | 3.404237000  | -3.404237000 | -0.925167000 |
| C | 3.641605000  | 3.641605000  | 2.284327000  |
| C | 3.641605000  | -3.641605000 | -2.284327000 |
| C | 4.128975000  | 4.128975000  | -0.025874000 |
| C | 4.128975000  | -4.128975000 | 0.025874000  |
| C | 4.249393000  | 0.648891000  | 0.230472000  |
| C | 4.249393000  | -0.648891000 | -0.230472000 |
| C | 4.586744000  | 4.586744000  | 2.686010000  |
| C | 4.586744000  | -4.586744000 | -2.686010000 |
| C | 5.074661000  | 5.074661000  | 0.370326000  |
| C | 5.074661000  | -5.074661000 | -0.370326000 |
| C | 5.306530000  | 5.306530000  | 1.728265000  |
| C | 5.306530000  | -5.306530000 | -1.728265000 |
| C | 5.513552000  | 1.387611000  | 0.574172000  |
| C | 5.513552000  | -1.387611000 | -0.574172000 |
| C | -0.648891000 | 4.249393000  | -0.230472000 |
| C | -0.648891000 | -4.249393000 | 0.230472000  |
| C | -1.072313000 | 2.853073000  | -0.302595000 |
| C | -1.072313000 | -2.853073000 | 0.302595000  |
| C | -1.387611000 | 5.513552000  | -0.574172000 |
| C | -1.387611000 | -5.513552000 | 0.574172000  |
| C | -2.387508000 | 2.387508000  | -0.516516000 |
| C | -2.387508000 | -2.387508000 | 0.516516000  |
| C | -2.853073000 | 1.072313000  | -0.302595000 |
| C | -2.853073000 | -1.072313000 | 0.302595000  |
| C | -3.404237000 | 3.404237000  | -0.925167000 |
| C | -3.404237000 | -3.404237000 | 0.925167000  |
| C | -3.641605000 | 3.641605000  | -2.284327000 |
| C | -3.641605000 | -3.641605000 | 2.284327000  |
| C | -4.128975000 | 4.128975000  | 0.025874000  |
| C | -4.128975000 | -4.128975000 | -0.025874000 |
| C | -4.249393000 | 0.648891000  | -0.230472000 |
| C | -4.249393000 | -0.648891000 | 0.230472000  |
| C | -4.586744000 | 4.586744000  | -2.686010000 |
| C | -4.586744000 | -4.586744000 | 2.686010000  |
| C | -5.074661000 | 5.074661000  | -0.370326000 |
| C | -5.074661000 | -5.074661000 | 0.370326000  |
| C | -5.306530000 | 5.306530000  | -1.728265000 |
| C | -5.306530000 | -5.306530000 | 1.728265000  |
| C | -5.513552000 | 1.387611000  | -0.574172000 |
| C | -5.513552000 | -1.387611000 | 0.574172000  |
| H | 0.676491000  | 6.330773000  | 0.737339000  |
| H | 0.676491000  | -6.330773000 | -0.737339000 |
| H | 1.983094000  | 5.414637000  | 1.487001000  |
| H | 1.983094000  | -5.414637000 | -1.487001000 |
| H | 2.077178000  | 5.826351000  | -0.223299000 |
| H | 2.077178000  | -5.826351000 | 0.223299000  |
| H | 3.075951000  | 3.075951000  | 3.023988000  |

|   |              |              |              |
|---|--------------|--------------|--------------|
| H | 3.075951000  | -3.075951000 | -3.023988000 |
| H | 3.941827000  | 3.941827000  | -1.082891000 |
| H | 3.941827000  | -3.941827000 | 1.082891000  |
| H | 4.761699000  | 4.761699000  | 3.746834000  |
| H | 4.761699000  | -4.761699000 | -3.746834000 |
| H | 5.414637000  | 1.983094000  | 1.487001000  |
| H | 5.414637000  | -1.983094000 | -1.487001000 |
| H | 5.632046000  | 5.632046000  | -0.381660000 |
| H | 5.632046000  | -5.632046000 | 0.381660000  |
| H | 5.826351000  | 2.077178000  | -0.223299000 |
| H | 5.826351000  | -2.077178000 | 0.223299000  |
| H | 6.044837000  | 6.044837000  | 2.039531000  |
| H | 6.044837000  | -6.044837000 | -2.039531000 |
| H | 6.330773000  | 0.676491000  | 0.737339000  |
| H | 6.330773000  | -0.676491000 | -0.737339000 |
| H | -0.676491000 | 6.330773000  | -0.737339000 |
| H | -0.676491000 | -6.330773000 | 0.737339000  |
| H | -1.983094000 | 5.414637000  | -1.487001000 |
| H | -1.983094000 | -5.414637000 | 1.487001000  |
| H | -2.077178000 | 5.826351000  | 0.223299000  |
| H | -2.077178000 | -5.826351000 | -0.223299000 |
| H | -3.075951000 | 3.075951000  | -3.023988000 |
| H | -3.075951000 | -3.075951000 | 3.023988000  |
| H | -3.941827000 | 3.941827000  | 1.082891000  |
| H | -3.941827000 | -3.941827000 | -1.082891000 |
| H | -4.761699000 | 4.761699000  | -3.746834000 |
| H | -4.761699000 | -4.761699000 | 3.746834000  |
| H | -5.414637000 | 1.983094000  | -1.487001000 |
| H | -5.414637000 | -1.983094000 | 1.487001000  |
| H | -5.632046000 | 5.632046000  | 0.381660000  |
| H | -5.632046000 | -5.632046000 | -0.381660000 |
| H | -5.826351000 | 2.077178000  | 0.223299000  |
| H | -5.826351000 | -2.077178000 | -0.223299000 |
| H | -6.044837000 | 6.044837000  | -2.039531000 |
| H | -6.044837000 | -6.044837000 | 2.039531000  |
| H | -6.330773000 | 0.676491000  | -0.737339000 |
| H | -6.330773000 | -0.676491000 | 0.737339000  |
| N | 0.000000000  | 2.040300000  | 0.000000000  |
| N | 0.000000000  | -2.040300000 | 0.000000000  |
| N | 2.040300000  | 0.000000000  | 0.000000000  |
| N | -2.040300000 | 0.000000000  | 0.000000000  |

**51. Cu[A<sub>4</sub>Br<sub>8</sub>]; S = ½ (saddled)**

|    |              |              |              |
|----|--------------|--------------|--------------|
| Cu | 0.000000000  | 0.000000000  | 0.004317000  |
| Br | 1.484323000  | -5.512787000 | -1.417179000 |
| Br | 1.881957000  | 5.114076000  | -2.216799000 |
| Br | 5.130773000  | -1.913377000 | 2.168092000  |
| Br | 5.549443000  | 1.452838000  | 1.382950000  |
| Br | -1.484323000 | 5.512787000  | -1.417179000 |



|    |              |              |              |
|----|--------------|--------------|--------------|
| Br | -1.881957000 | -5.114076000 | -2.216799000 |
| Br | -5.130773000 | 1.913377000  | 2.168092000  |
| Br | -5.549443000 | -1.452838000 | 1.382950000  |
| C  | 0.437484000  | -4.042480000 | -0.874493000 |
| C  | 0.860211000  | -2.846535000 | -0.187057000 |
| C  | 0.890863000  | 3.872268000  | -1.205906000 |
| C  | 1.297848000  | 2.588732000  | -0.674258000 |
| C  | 2.100995000  | -2.602683000 | 0.462844000  |
| C  | 2.590423000  | -1.296331000 | 0.674596000  |
| C  | 2.606403000  | 2.107907000  | -0.449556000 |
| C  | 2.832375000  | -3.723055000 | 0.896085000  |
| C  | 2.853585000  | 0.861828000  | 0.188194000  |
| C  | 3.188249000  | -7.233439000 | 2.973121000  |
| C  | 3.393162000  | -4.731045000 | 1.302803000  |
| C  | 3.718920000  | 2.870748000  | -0.847650000 |
| C  | 3.879985000  | -0.897601000 | 1.194976000  |
| C  | 4.054008000  | 0.430445000  | 0.865045000  |
| C  | 4.707561000  | 3.484857000  | -1.223026000 |
| C  | 4.750885000  | -7.200476000 | 0.306356000  |
| C  | 5.840752000  | -5.630426000 | 2.763440000  |
| C  | 6.013386000  | 6.169844000  | -0.971502000 |
| C  | 6.139428000  | 4.578255000  | -3.622240000 |
| C  | 7.703433000  | 3.568462000  | -1.131630000 |
| C  | -0.437484000 | 4.042480000  | -0.874493000 |
| C  | -0.860211000 | 2.846535000  | -0.187057000 |
| C  | -0.890863000 | -3.872268000 | -1.205906000 |
| C  | -1.297848000 | -2.588732000 | -0.674258000 |
| C  | -2.100995000 | 2.602683000  | 0.462844000  |
| C  | -2.590423000 | 1.296331000  | 0.674596000  |
| C  | -2.606403000 | -2.107907000 | -0.449556000 |
| C  | -2.832375000 | 3.723055000  | 0.896085000  |
| C  | -2.853585000 | -0.861828000 | 0.188194000  |
| C  | -3.188249000 | 7.233439000  | 2.973121000  |
| C  | -3.393162000 | 4.731045000  | 1.302803000  |
| C  | -3.718920000 | -2.870748000 | -0.847650000 |
| C  | -3.879985000 | 0.897601000  | 1.194976000  |
| C  | -4.054008000 | -0.430445000 | 0.865045000  |
| C  | -4.707561000 | -3.484857000 | -1.223026000 |
| C  | -4.750885000 | 7.200476000  | 0.306356000  |
| C  | -5.840752000 | 5.630426000  | 2.763440000  |
| C  | -6.013386000 | -6.169844000 | -0.971502000 |
| C  | -6.139428000 | -4.578255000 | -3.622240000 |
| C  | -7.703433000 | -3.568462000 | -1.131630000 |
| H  | 2.274138000  | -7.530944000 | 2.439793000  |
| H  | 2.892091000  | -6.655545000 | 3.859967000  |
| H  | 3.703327000  | -8.145641000 | 3.310929000  |
| H  | 3.840055000  | -7.495935000 | -0.233997000 |
| H  | 5.075905000  | 6.651532000  | -1.284554000 |
| H  | 5.208581000  | 5.051116000  | -3.966634000 |
| H  | 5.305108000  | -8.113802000 | 0.570822000  |
| H  | 5.371926000  | -6.601004000 | -0.373718000 |

|    |              |              |              |
|----|--------------|--------------|--------------|
| H  | 5.559052000  | -5.020108000 | 3.633614000  |
| H  | 6.008512000  | 6.101796000  | 0.125598000  |
| H  | 6.201788000  | 3.580228000  | -4.078349000 |
| H  | 6.440552000  | -6.481224000 | 3.119958000  |
| H  | 6.470491000  | -5.015244000 | 2.104883000  |
| H  | 6.852772000  | 6.813665000  | -1.275287000 |
| H  | 6.986714000  | 5.179383000  | -3.985754000 |
| H  | 7.701106000  | 3.500957000  | -0.034365000 |
| H  | 7.744125000  | 2.545615000  | -1.531637000 |
| H  | 8.615912000  | 4.099882000  | -1.441537000 |
| H  | -2.274138000 | 7.530944000  | 2.439793000  |
| H  | -2.892091000 | 6.655545000  | 3.859967000  |
| H  | -3.703327000 | 8.145641000  | 3.310929000  |
| H  | -3.840055000 | 7.495935000  | -0.233997000 |
| H  | -5.075905000 | -6.651532000 | -1.284554000 |
| H  | -5.208581000 | -5.051116000 | -3.966634000 |
| H  | -5.305108000 | 8.113802000  | 0.570822000  |
| H  | -5.371926000 | 6.601004000  | -0.373718000 |
| H  | -5.559052000 | 5.020108000  | 3.633614000  |
| H  | -6.008512000 | -6.101796000 | 0.125598000  |
| H  | -6.201788000 | -3.580228000 | -4.078349000 |
| H  | -6.440552000 | 6.481224000  | 3.119958000  |
| H  | -6.470491000 | 5.015244000  | 2.104883000  |
| H  | -6.852772000 | -6.813665000 | -1.275287000 |
| H  | -6.986714000 | -5.179383000 | -3.985754000 |
| H  | -7.701106000 | -3.500957000 | -0.034365000 |
| H  | -7.744125000 | -2.545615000 | -1.531637000 |
| H  | -8.615912000 | -4.099882000 | -1.441537000 |
| N  | 0.185894000  | 1.962870000  | -0.150693000 |
| N  | 1.966195000  | -0.182560000 | 0.154049000  |
| N  | -0.185894000 | -1.962870000 | -0.150693000 |
| N  | -1.966195000 | 0.182560000  | 0.154049000  |
| Si | 4.305820000  | -6.221276000 | 1.850286000  |
| Si | 6.166610000  | 4.462034000  | -1.744948000 |
| Si | -4.305820000 | 6.221276000  | 1.850286000  |
| Si | -6.166610000 | -4.462034000 | -1.744948000 |

**52. Cu[A<sub>4</sub>Br<sub>8</sub>]; S = ½ (ruffled)**

|    |              |              |              |
|----|--------------|--------------|--------------|
| Cu | 0.000000000  | 0.000000000  | 0.000000000  |
| Br | 1.585989000  | 5.727948000  | -0.690920000 |
| Br | 1.585989000  | -5.727948000 | 0.690920000  |
| Br | 5.727948000  | 1.585989000  | -0.690920000 |
| Br | 5.727948000  | -1.585989000 | 0.690920000  |
| Br | -1.585989000 | 5.727948000  | 0.690920000  |
| Br | -1.585989000 | -5.727948000 | -0.690920000 |
| Br | -5.727948000 | 1.585989000  | 0.690920000  |
| Br | -5.727948000 | -1.585989000 | -0.690920000 |
| C  | 0.620408000  | 4.157000000  | -0.302178000 |
| C  | 0.620408000  | -4.157000000 | 0.302178000  |

|   |              |              |              |
|---|--------------|--------------|--------------|
| C | 1.021046000  | 2.775800000  | -0.448184000 |
| C | 1.021046000  | -2.775800000 | 0.448184000  |
| C | 2.293379000  | 2.293379000  | -0.844551000 |
| C | 2.293379000  | -2.293379000 | 0.844551000  |
| C | 2.775800000  | 1.021046000  | -0.448184000 |
| C | 2.775800000  | -1.021046000 | 0.448184000  |
| C | 3.109924000  | 3.109924000  | -1.645327000 |
| C | 3.109924000  | -3.109924000 | 1.645327000  |
| C | 3.756609000  | 5.960676000  | -4.489885000 |
| C | 3.756609000  | -5.960676000 | 4.489885000  |
| C | 3.772672000  | 3.772672000  | -2.431473000 |
| C | 3.772672000  | -3.772672000 | 2.431473000  |
| C | 4.157000000  | 0.620408000  | -0.302178000 |
| C | 4.157000000  | -0.620408000 | 0.302178000  |
| C | 5.873404000  | 5.873404000  | -2.226640000 |
| C | 5.873404000  | -5.873404000 | 2.226640000  |
| C | 5.960676000  | 3.756609000  | -4.489885000 |
| C | 5.960676000  | -3.756609000 | 4.489885000  |
| C | -0.620408000 | 4.157000000  | 0.302178000  |
| C | -0.620408000 | -4.157000000 | -0.302178000 |
| C | -1.021046000 | 2.775800000  | 0.448184000  |
| C | -1.021046000 | -2.775800000 | -0.448184000 |
| C | -2.293379000 | 2.293379000  | 0.844551000  |
| C | -2.293379000 | -2.293379000 | -0.844551000 |
| C | -2.775800000 | 1.021046000  | 0.448184000  |
| C | -2.775800000 | -1.021046000 | -0.448184000 |
| C | -3.109924000 | 3.109924000  | 1.645327000  |
| C | -3.109924000 | -3.109924000 | -1.645327000 |
| C | -3.756609000 | 5.960676000  | 4.489885000  |
| C | -3.756609000 | -5.960676000 | -4.489885000 |
| C | -3.772672000 | 3.772672000  | 2.431473000  |
| C | -3.772672000 | -3.772672000 | -2.431473000 |
| C | -4.157000000 | 0.620408000  | 0.302178000  |
| C | -4.157000000 | -0.620408000 | -0.302178000 |
| C | -5.873404000 | 5.873404000  | 2.226640000  |
| C | -5.873404000 | -5.873404000 | -2.226640000 |
| C | -5.960676000 | 3.756609000  | 4.489885000  |
| C | -5.960676000 | -3.756609000 | -4.489885000 |
| H | 3.069927000  | 6.536174000  | -3.852335000 |
| H | 3.069927000  | -6.536174000 | 3.852335000  |
| H | 3.150426000  | 5.363372000  | -5.185597000 |
| H | 3.150426000  | -5.363372000 | 5.185597000  |
| H | 4.359913000  | 6.669342000  | -5.077192000 |
| H | 4.359913000  | -6.669342000 | 5.077192000  |
| H | 5.218271000  | 6.475126000  | -1.580796000 |
| H | 5.218271000  | -6.475126000 | 1.580796000  |
| H | 5.363372000  | 3.150426000  | -5.185597000 |
| H | 5.363372000  | -3.150426000 | 5.185597000  |
| H | 6.475126000  | 5.218271000  | -1.580796000 |
| H | 6.475126000  | -5.218271000 | 1.580796000  |
| H | 6.536174000  | 3.069927000  | -3.852335000 |

|    |              |              |              |
|----|--------------|--------------|--------------|
| H  | 6.536174000  | -3.069927000 | 3.852335000  |
| H  | 6.553403000  | 6.553403000  | -2.762107000 |
| H  | 6.553403000  | -6.553403000 | 2.762107000  |
| H  | 6.669342000  | 4.359913000  | -5.077192000 |
| H  | 6.669342000  | -4.359913000 | 5.077192000  |
| H  | -3.069927000 | 6.536174000  | 3.852335000  |
| H  | -3.069927000 | -6.536174000 | -3.852335000 |
| H  | -3.150426000 | 5.363372000  | 5.185597000  |
| H  | -3.150426000 | -5.363372000 | -5.185597000 |
| H  | -4.359913000 | 6.669342000  | 5.077192000  |
| H  | -4.359913000 | -6.669342000 | -5.077192000 |
| H  | -5.218271000 | 6.475126000  | 1.580796000  |
| H  | -5.218271000 | -6.475126000 | -1.580796000 |
| H  | -5.363372000 | 3.150426000  | 5.185597000  |
| H  | -5.363372000 | -3.150426000 | -5.185597000 |
| H  | -6.475126000 | 5.218271000  | 1.580796000  |
| H  | -6.475126000 | -5.218271000 | -1.580796000 |
| H  | -6.536174000 | 3.069927000  | 3.852335000  |
| H  | -6.536174000 | -3.069927000 | -3.852335000 |
| H  | -6.553403000 | 6.553403000  | 2.762107000  |
| H  | -6.553403000 | -6.553403000 | -2.762107000 |
| H  | -6.669342000 | 4.359913000  | 5.077192000  |
| H  | -6.669342000 | -4.359913000 | -5.077192000 |
| N  | 0.000000000  | 1.975142000  | 0.000000000  |
| N  | 0.000000000  | -1.975142000 | 0.000000000  |
| N  | 1.975142000  | 0.000000000  | 0.000000000  |
| N  | -1.975142000 | 0.000000000  | 0.000000000  |
| Si | 4.854702000  | 4.854702000  | -3.438577000 |
| Si | 4.854702000  | -4.854702000 | 3.438577000  |
| Si | -4.854702000 | 4.854702000  | 3.438577000  |
| Si | -4.854702000 | -4.854702000 | -3.438577000 |

**53. Ni[A<sub>4</sub>Br<sub>8</sub>]; S = 0 (saddled)**

|    |              |              |              |
|----|--------------|--------------|--------------|
| Ni | -0.001197000 | -0.001614000 | 0.000000000  |
| Br | 1.501014000  | -2.456367000 | 5.013586000  |
| Br | 1.501014000  | -2.456367000 | -5.013586000 |
| Br | 5.305193000  | 1.586484000  | 1.750299000  |
| Br | 5.305193000  | 1.586484000  | -1.750299000 |
| Br | -1.997026000 | -2.074184000 | 5.013666000  |
| Br | -1.997026000 | -2.074184000 | -5.013666000 |
| Br | -4.845488000 | 2.687232000  | 1.749663000  |
| Br | -4.845488000 | 2.687232000  | -1.749663000 |
| C  | 0.538762000  | -1.400035000 | 3.788899000  |
| C  | 0.538762000  | -1.400035000 | -3.788899000 |
| C  | 1.039880000  | -0.698414000 | 2.631920000  |
| C  | 1.039880000  | -0.698414000 | -2.631920000 |
| C  | 2.352784000  | -0.256655000 | 2.375076000  |
| C  | 2.352784000  | -0.256655000 | -2.375076000 |
| C  | 2.688525000  | 0.264678000  | 1.111443000  |

|   |              |              |              |
|---|--------------|--------------|--------------|
| C | 2.688525000  | 0.264678000  | -1.111443000 |
| C | 3.315195000  | -0.321722000 | 3.399477000  |
| C | 3.315195000  | -0.321722000 | -3.399477000 |
| C | 3.933956000  | 0.857985000  | 0.688079000  |
| C | 3.933956000  | 0.857985000  | -0.688079000 |
| C | 4.129303000  | -0.372066000 | 4.309830000  |
| C | 4.129303000  | -0.372066000 | -4.309830000 |
| C | 4.771877000  | 0.620319000  | 7.079511000  |
| C | 4.771877000  | 0.620319000  | -7.079511000 |
| C | 5.458010000  | -2.266067000 | 6.205029000  |
| C | 5.458010000  | -2.266067000 | -6.205029000 |
| C | 7.002059000  | 0.144705000  | 4.978580000  |
| C | 7.002059000  | 0.144705000  | -4.978580000 |
| C | -0.829307000 | -1.250446000 | 3.789065000  |
| C | -0.829307000 | -1.250446000 | -3.789065000 |
| C | -1.167203000 | -0.457214000 | 2.632162000  |
| C | -1.167203000 | -0.457214000 | -2.632162000 |
| C | -2.354067000 | 0.257357000  | 2.375602000  |
| C | -2.354067000 | 0.257357000  | -2.375602000 |
| C | -2.571004000 | 0.836886000  | 1.111489000  |
| C | -2.571004000 | 0.836886000  | -1.111489000 |
| C | -3.304775000 | 0.405037000  | 3.402333000  |
| C | -3.304775000 | 0.405037000  | -3.402333000 |
| C | -3.660305000 | 1.683412000  | 0.688052000  |
| C | -3.660305000 | 1.683412000  | -0.688052000 |
| C | -4.105992000 | 0.535928000  | 4.316092000  |
| C | -4.105992000 | 0.535928000  | -4.316092000 |
| C | -4.498855000 | 1.643366000  | 7.088599000  |
| C | -4.498855000 | 1.643366000  | -7.088599000 |
| C | -5.827596000 | -1.008863000 | 6.212352000  |
| C | -5.827596000 | -1.008863000 | -6.212352000 |
| C | -6.783115000 | 1.693000000  | 4.992492000  |
| C | -6.783115000 | 1.693000000  | -4.992492000 |
| H | 3.790494000  | 0.284818000  | 7.443849000  |
| H | 3.790494000  | 0.284818000  | -7.443849000 |
| H | 4.474271000  | -2.614495000 | 6.551387000  |
| H | 4.474271000  | -2.614495000 | -6.551387000 |
| H | 4.675290000  | 1.666473000  | 6.756204000  |
| H | 4.675290000  | 1.666473000  | -6.756204000 |
| H | 5.483953000  | 0.582155000  | 7.918038000  |
| H | 5.483953000  | 0.582155000  | -7.918038000 |
| H | 5.773851000  | -2.911061000 | 5.373218000  |
| H | 5.773851000  | -2.911061000 | -5.373218000 |
| H | 6.175319000  | -2.386432000 | 7.030942000  |
| H | 6.175319000  | -2.386432000 | -7.030942000 |
| H | 6.919040000  | 1.194330000  | 4.661495000  |
| H | 6.919040000  | 1.194330000  | -4.661495000 |
| H | 7.307222000  | -0.449445000 | 4.105800000  |
| H | 7.307222000  | -0.449445000 | -4.105800000 |
| H | 7.794456000  | 0.078801000  | 5.739327000  |
| H | 7.794456000  | 0.078801000  | -5.739327000 |

|    |              |              |              |
|----|--------------|--------------|--------------|
| H  | -3.618830000 | 1.092416000  | 7.449746000  |
| H  | -3.618830000 | 1.092416000  | -7.449746000 |
| H  | -4.167139000 | 2.640483000  | 6.766066000  |
| H  | -4.167139000 | 2.640483000  | -6.766066000 |
| H  | -4.948385000 | -1.573525000 | 6.554789000  |
| H  | -4.948385000 | -1.573525000 | -6.554789000 |
| H  | -5.198713000 | 1.767128000  | 7.929147000  |
| H  | -5.198713000 | 1.767128000  | -7.929147000 |
| H  | -6.284980000 | -1.562880000 | 5.380741000  |
| H  | -6.284980000 | -1.562880000 | -5.380741000 |
| H  | -6.463183000 | 2.696960000  | 4.678113000  |
| H  | -6.463183000 | 2.696960000  | -4.678113000 |
| H  | -6.550912000 | -0.963911000 | 7.040583000  |
| H  | -6.550912000 | -0.963911000 | -7.040583000 |
| H  | -7.216670000 | 1.186580000  | 4.118721000  |
| H  | -7.216670000 | 1.186580000  | -4.118721000 |
| H  | -7.568798000 | 1.807345000  | 5.754444000  |
| H  | -7.568798000 | 1.807345000  | -5.754444000 |
| N  | 1.902014000  | 0.030063000  | 0.000000000  |
| N  | -0.028466000 | -0.254356000 | 1.878448000  |
| N  | -0.028466000 | -0.254356000 | -1.878448000 |
| N  | -1.853367000 | 0.438683000  | 0.000000000  |
| Si | 5.360274000  | -0.467190000 | 5.662741000  |
| Si | 5.360274000  | -0.467190000 | -5.662741000 |
| Si | -5.323060000 | 0.721173000  | 5.672143000  |
| Si | -5.323060000 | 0.721173000  | -5.672143000 |

#### 54. Ni[A<sub>4</sub>Br<sub>8</sub>]; S = 0 (ruffled)

|    |              |              |              |
|----|--------------|--------------|--------------|
| Ni | 0.000000000  | 0.000000000  | -0.000713000 |
| Br | 0.854314000  | -5.719999000 | 1.101841000  |
| Br | 2.124929000  | 5.450277000  | -0.706116000 |
| Br | 5.452853000  | -2.130707000 | 0.686629000  |
| Br | 5.718992000  | 0.845545000  | -1.119303000 |
| Br | -0.854314000 | 5.719999000  | 1.101841000  |
| Br | -2.124929000 | -5.450277000 | -0.706116000 |
| Br | -5.452853000 | 2.130707000  | 0.686629000  |
| Br | -5.718992000 | -0.845545000 | -1.119303000 |
| C  | 0.128866000  | -4.093531000 | 0.494489000  |
| C  | 0.678924000  | -2.763658000 | 0.606848000  |
| C  | 1.023692000  | 3.991848000  | -0.255592000 |
| C  | 1.244100000  | 2.587129000  | -0.504044000 |
| C  | 1.982653000  | -2.413572000 | 1.018791000  |
| C  | 2.414449000  | 1.983984000  | -1.018918000 |
| C  | 2.587205000  | -1.244712000 | 0.501342000  |
| C  | 2.704823000  | -3.241091000 | 1.893625000  |
| C  | 2.764068000  | 0.678662000  | -0.609742000 |
| C  | 3.237504000  | -5.731820000 | 5.117060000  |
| C  | 3.251049000  | 2.707720000  | -1.884502000 |
| C  | 3.315858000  | -3.885516000 | 2.735158000  |

|   |              |              |              |
|---|--------------|--------------|--------------|
| C | 3.920013000  | 3.308933000  | -2.713766000 |
| C | 3.991453000  | -1.025892000 | 0.250383000  |
| C | 4.093883000  | 0.126589000  | -0.499981000 |
| C | 4.533003000  | 4.072630000  | -5.577027000 |
| C | 4.881777000  | 6.083188000  | -3.245536000 |
| C | 5.215688000  | -6.181448000 | 2.770936000  |
| C | 5.604419000  | -3.761477000 | 4.667415000  |
| C | 6.782885000  | 3.631975000  | -3.490719000 |
| C | -0.128866000 | 4.093531000  | 0.494489000  |
| C | -0.678924000 | 2.763658000  | 0.606848000  |
| C | -1.023692000 | -3.991848000 | -0.255592000 |
| C | -1.244100000 | -2.587129000 | -0.504044000 |
| C | -1.982653000 | 2.413572000  | 1.018791000  |
| C | -2.414449000 | -1.983984000 | -1.018918000 |
| C | -2.587205000 | 1.244712000  | 0.501342000  |
| C | -2.704823000 | 3.241091000  | 1.893625000  |
| C | -2.764068000 | -0.678662000 | -0.609742000 |
| C | -3.237504000 | 5.731820000  | 5.117060000  |
| C | -3.251049000 | -2.707720000 | -1.884502000 |
| C | -3.315858000 | 3.885516000  | 2.735158000  |
| C | -3.920013000 | -3.308933000 | -2.713766000 |
| C | -3.991453000 | 1.025892000  | 0.250383000  |
| C | -4.093883000 | -0.126589000 | -0.499981000 |
| C | -4.533003000 | -4.072630000 | -5.577027000 |
| C | -4.881777000 | -6.083188000 | -3.245536000 |
| C | -5.215688000 | 6.181448000  | 2.770936000  |
| C | -5.604419000 | 3.761477000  | 4.667415000  |
| C | -6.782885000 | -3.631975000 | -3.490719000 |
| H | 2.479330000  | -6.352671000 | 4.618702000  |
| H | 2.713946000  | -4.982197000 | 5.727197000  |
| H | 3.501622000  | 4.418781000  | -5.734381000 |
| H | 3.823231000  | -6.376331000 | 5.789996000  |
| H | 3.847909000  | 6.432203000  | -3.379476000 |
| H | 4.479987000  | -6.818499000 | 2.259895000  |
| H | 4.588221000  | 3.016505000  | -5.876773000 |
| H | 5.099727000  | -3.008572000 | 5.289194000  |
| H | 5.145703000  | 6.197300000  | -2.184461000 |
| H | 5.196062000  | 4.653466000  | -6.236219000 |
| H | 5.544443000  | 6.730958000  | -3.838942000 |
| H | 5.826640000  | -5.687105000 | 2.002237000  |
| H | 5.872330000  | -6.825412000 | 3.375594000  |
| H | 6.192804000  | -3.230067000 | 3.905527000  |
| H | 6.296681000  | -4.330515000 | 5.306274000  |
| H | 6.843896000  | 2.569103000  | -3.765190000 |
| H | 7.061309000  | 3.727472000  | -2.431468000 |
| H | 7.517812000  | 4.186564000  | -4.093290000 |
| H | -2.479330000 | 6.352671000  | 4.618702000  |
| H | -2.713946000 | 4.982197000  | 5.727197000  |
| H | -3.501622000 | -4.418781000 | -5.734381000 |
| H | -3.823231000 | 6.376331000  | 5.789996000  |
| H | -3.847909000 | -6.432203000 | -3.379476000 |

|    |              |              |              |
|----|--------------|--------------|--------------|
| H  | -4.479987000 | 6.818499000  | 2.259895000  |
| H  | -4.588221000 | -3.016505000 | -5.876773000 |
| H  | -5.099727000 | 3.008572000  | 5.289194000  |
| H  | -5.145703000 | -6.197300000 | -2.184461000 |
| H  | -5.196062000 | -4.653466000 | -6.236219000 |
| H  | -5.544443000 | -6.730958000 | -3.838942000 |
| H  | -5.826640000 | 5.687105000  | 2.002237000  |
| H  | -5.872330000 | 6.825412000  | 3.375594000  |
| H  | -6.192804000 | 3.230067000  | 3.905527000  |
| H  | -6.296681000 | 4.330515000  | 5.306274000  |
| H  | -6.843896000 | -2.569103000 | -3.765190000 |
| H  | -7.061309000 | -3.727472000 | -2.431468000 |
| H  | -7.517812000 | -4.186564000 | -4.093290000 |
| N  | 0.192579000  | 1.874462000  | 0.020133000  |
| N  | 1.874982000  | -0.192609000 | -0.022544000 |
| N  | -0.192579000 | -1.874462000 | 0.020133000  |
| N  | -1.874982000 | 0.192609000  | -0.022544000 |
| Si | 4.353458000  | -4.903387000 | 3.851140000  |
| Si | 5.042724000  | 4.286391000  | -3.780423000 |
| Si | -4.353458000 | 4.903387000  | 3.851140000  |
| Si | -5.042724000 | -4.286391000 | -3.780423000 |

**55. Pd[A<sub>4</sub>Br<sub>8</sub>]; S = 0 (saddled)**

|    |              |              |              |
|----|--------------|--------------|--------------|
| Pd | 0.000000000  | 0.000000000  | -0.030946000 |
| Br | 1.219210000  | -5.392690000 | -2.025292000 |
| Br | 2.241430000  | 5.000543000  | -2.155942000 |
| Br | 5.140532000  | -2.255643000 | 1.861846000  |
| Br | 5.527324000  | 1.174810000  | 1.755830000  |
| Br | -1.219210000 | 5.392690000  | -2.025292000 |
| Br | -2.241430000 | -5.000543000 | -2.155942000 |
| Br | -5.140532000 | 2.255643000  | 1.861846000  |
| Br | -5.527324000 | -1.174810000 | 1.755830000  |
| C  | 0.281464000  | -4.006629000 | -1.160225000 |
| C  | 0.819791000  | -2.853860000 | -0.472023000 |
| C  | 1.086488000  | 3.850616000  | -1.211131000 |
| C  | 1.401271000  | 2.604408000  | -0.545162000 |
| C  | 2.125553000  | -2.666079000 | 0.044479000  |
| C  | 2.623820000  | -1.405251000 | 0.439910000  |
| C  | 2.658243000  | 2.140360000  | -0.089633000 |
| C  | 2.874619000  | 0.820541000  | 0.369424000  |
| C  | 2.925914000  | -3.814204000 | 0.200258000  |
| C  | 3.564606000  | -4.844094000 | 0.359640000  |
| C  | 3.570472000  | -7.562098000 | 1.656085000  |
| C  | 3.721940000  | 3.062617000  | -0.059058000 |
| C  | 3.895640000  | -1.094250000 | 1.057790000  |
| C  | 4.051469000  | 0.273080000  | 1.010839000  |
| C  | 4.614830000  | 3.896083000  | -0.019588000 |
| C  | 4.870711000  | -7.098512000 | -1.111531000 |
| C  | 5.376175000  | 6.602190000  | 1.052873000  |



|   |              |              |              |
|---|--------------|--------------|--------------|
| C | 6.159421000  | -5.865934000 | 1.441672000  |
| C | 6.331736000  | 5.650315000  | -1.730674000 |
| C | 7.450936000  | 4.305001000  | 0.845409000  |
| C | -0.281464000 | 4.006629000  | -1.160225000 |
| C | -0.819791000 | 2.853860000  | -0.472023000 |
| C | -1.086488000 | -3.850616000 | -1.211131000 |
| C | -1.401271000 | -2.604408000 | -0.545162000 |
| C | -2.125553000 | 2.666079000  | 0.044479000  |
| C | -2.623820000 | 1.405251000  | 0.439910000  |
| C | -2.658243000 | -2.140360000 | -0.089633000 |
| C | -2.874619000 | -0.820541000 | 0.369424000  |
| C | -2.925914000 | 3.814204000  | 0.200258000  |
| C | -3.564606000 | 4.844094000  | 0.359640000  |
| C | -3.570472000 | 7.562098000  | 1.656085000  |
| C | -3.721940000 | -3.062617000 | -0.059058000 |
| C | -3.895640000 | 1.094250000  | 1.057790000  |
| C | -4.051469000 | -0.273080000 | 1.010839000  |
| C | -4.614830000 | -3.896083000 | -0.019588000 |
| C | -4.870711000 | 7.098512000  | -1.111531000 |
| C | -5.376175000 | -6.602190000 | 1.052873000  |
| C | -6.159421000 | 5.865934000  | 1.441672000  |
| C | -6.331736000 | -5.650315000 | -1.730674000 |
| C | -7.450936000 | -4.305001000 | 0.845409000  |
| H | 2.614009000  | -7.809554000 | 1.173962000  |
| H | 3.351945000  | -7.123388000 | 2.640022000  |
| H | 3.917756000  | -7.331375000 | -1.608238000 |
| H | 4.131793000  | -8.496172000 | 1.811061000  |
| H | 4.477067000  | 7.046084000  | 0.602256000  |
| H | 5.126530000  | 6.296032000  | 2.078700000  |
| H | 5.422906000  | -6.392761000 | -1.747599000 |
| H | 5.432153000  | 6.076402000  | -2.197912000 |
| H | 5.454271000  | -8.028398000 | -1.034482000 |
| H | 5.949982000  | -5.424831000 | 2.427028000  |
| H | 6.156808000  | 7.376540000  | 1.103401000  |
| H | 6.653160000  | 4.789936000  | -2.334040000 |
| H | 6.701869000  | -5.120478000 | 0.843139000  |
| H | 6.815385000  | -6.737010000 | 1.589286000  |
| H | 7.126322000  | 6.411297000  | -1.757596000 |
| H | 7.211811000  | 4.005622000  | 1.876186000  |
| H | 7.745301000  | 3.403830000  | 0.289312000  |
| H | 8.311734000  | 4.989664000  | 0.879404000  |
| H | -2.614009000 | 7.809554000  | 1.173962000  |
| H | -3.351945000 | 7.123388000  | 2.640022000  |
| H | -3.917756000 | 7.331375000  | -1.608238000 |
| H | -4.131793000 | 8.496172000  | 1.811061000  |
| H | -4.477067000 | -7.046084000 | 0.602256000  |
| H | -5.126530000 | -6.296032000 | 2.078700000  |
| H | -5.422906000 | 6.392761000  | -1.747599000 |
| H | -5.432153000 | -6.076402000 | -2.197912000 |
| H | -5.454271000 | 8.028398000  | -1.034482000 |
| H | -5.949982000 | 5.424831000  | 2.427028000  |

|    |              |              |              |
|----|--------------|--------------|--------------|
| H  | -6.156808000 | -7.376540000 | 1.103401000  |
| H  | -6.653160000 | -4.789936000 | -2.334040000 |
| H  | -6.701869000 | 5.120478000  | 0.843139000  |
| H  | -6.815385000 | 6.737010000  | 1.589286000  |
| H  | -7.126322000 | -6.411297000 | -1.757596000 |
| H  | -7.211811000 | -4.005622000 | 1.876186000  |
| H  | -7.745301000 | -3.403830000 | 0.289312000  |
| H  | -8.311734000 | -4.989664000 | 0.879404000  |
| N  | 0.216462000  | 1.989409000  | -0.204287000 |
| N  | 2.004309000  | -0.216954000 | 0.110916000  |
| N  | -0.216462000 | -1.989409000 | -0.204287000 |
| N  | -2.004309000 | 0.216954000  | 0.110916000  |
| Si | 4.556781000  | -6.365912000 | 0.592426000  |
| Si | 5.965386000  | 5.131771000  | 0.040042000  |
| Si | -4.556781000 | 6.365912000  | 0.592426000  |
| Si | -5.965386000 | -5.131771000 | 0.040042000  |

**56. Pd[A<sub>4</sub>Br<sub>8</sub>]; S = 0 (ruffled)**

|    |              |              |              |
|----|--------------|--------------|--------------|
| Pd | 0.000000000  | 0.000000000  | 0.000000000  |
| Br | 1.629144000  | 5.765043000  | -0.568686000 |
| Br | 1.629144000  | -5.765043000 | 0.568686000  |
| Br | 5.765043000  | 1.629144000  | -0.568686000 |
| Br | 5.765043000  | -1.629144000 | 0.568686000  |
| Br | -1.629144000 | 5.765043000  | 0.568686000  |
| Br | -1.629144000 | -5.765043000 | -0.568686000 |
| Br | -5.765043000 | 1.629144000  | 0.568686000  |
| Br | -5.765043000 | -1.629144000 | -0.568686000 |
| C  | 0.637483000  | 4.192787000  | -0.261833000 |
| C  | 0.637483000  | -4.192787000 | 0.261833000  |
| C  | 1.048385000  | 2.810810000  | -0.393436000 |
| C  | 1.048385000  | -2.810810000 | 0.393436000  |
| C  | 2.331812000  | 2.331812000  | -0.751588000 |
| C  | 2.331812000  | -2.331812000 | 0.751588000  |
| C  | 2.810810000  | 1.048385000  | -0.393436000 |
| C  | 2.810810000  | -1.048385000 | 0.393436000  |
| C  | 3.168551000  | 3.168551000  | -1.511670000 |
| C  | 3.168551000  | -3.168551000 | 1.511670000  |
| C  | 3.847693000  | 3.847693000  | -2.268801000 |
| C  | 3.847693000  | -3.847693000 | 2.268801000  |
| C  | 3.871166000  | 6.075702000  | -4.282819000 |
| C  | 3.871166000  | -6.075702000 | 4.282819000  |
| C  | 4.192787000  | 0.637483000  | -0.261833000 |
| C  | 4.192787000  | -0.637483000 | 0.261833000  |
| C  | 5.943757000  | 5.943757000  | -1.981135000 |
| C  | 5.943757000  | -5.943757000 | 1.981135000  |
| C  | 6.075702000  | 3.871166000  | -4.282819000 |
| C  | 6.075702000  | -3.871166000 | 4.282819000  |
| C  | -0.637483000 | 4.192787000  | 0.261833000  |
| C  | -0.637483000 | -4.192787000 | -0.261833000 |

|   |              |              |              |
|---|--------------|--------------|--------------|
| C | -1.048385000 | 2.810810000  | 0.393436000  |
| C | -1.048385000 | -2.810810000 | -0.393436000 |
| C | -2.331812000 | 2.331812000  | 0.751588000  |
| C | -2.331812000 | -2.331812000 | -0.751588000 |
| C | -2.810810000 | 1.048385000  | 0.393436000  |
| C | -2.810810000 | -1.048385000 | -0.393436000 |
| C | -3.168551000 | 3.168551000  | 1.511670000  |
| C | -3.168551000 | -3.168551000 | -1.511670000 |
| C | -3.847693000 | 3.847693000  | 2.268801000  |
| C | -3.847693000 | -3.847693000 | -2.268801000 |
| C | -3.871166000 | 6.075702000  | 4.282819000  |
| C | -3.871166000 | -6.075702000 | -4.282819000 |
| C | -4.192787000 | 0.637483000  | 0.261833000  |
| C | -4.192787000 | -0.637483000 | -0.261833000 |
| C | -5.943757000 | 5.943757000  | 1.981135000  |
| C | -5.943757000 | -5.943757000 | -1.981135000 |
| C | -6.075702000 | 3.871166000  | 4.282819000  |
| C | -6.075702000 | -3.871166000 | -4.282819000 |
| H | 3.171606000  | 6.637809000  | -3.647307000 |
| H | 3.171606000  | -6.637809000 | 3.647307000  |
| H | 3.279104000  | 5.492091000  | -5.001898000 |
| H | 3.279104000  | -5.492091000 | 5.001898000  |
| H | 4.485185000  | 6.796265000  | -4.843962000 |
| H | 4.485185000  | -6.796265000 | 4.843962000  |
| H | 5.275998000  | 6.532844000  | -1.336560000 |
| H | 5.275998000  | -6.532844000 | 1.336560000  |
| H | 5.492091000  | 3.279104000  | -5.001898000 |
| H | 5.492091000  | -3.279104000 | 5.001898000  |
| H | 6.532844000  | 5.275998000  | -1.336560000 |
| H | 6.532844000  | -5.275998000 | 1.336560000  |
| H | 6.634099000  | 6.634099000  | -2.489435000 |
| H | 6.634099000  | -6.634099000 | 2.489435000  |
| H | 6.637809000  | 3.171606000  | -3.647307000 |
| H | 6.637809000  | -3.171606000 | 3.647307000  |
| H | 6.796265000  | 4.485185000  | -4.843962000 |
| H | 6.796265000  | -4.485185000 | 4.843962000  |
| H | -3.171606000 | 6.637809000  | 3.647307000  |
| H | -3.171606000 | -6.637809000 | -3.647307000 |
| H | -3.279104000 | 5.492091000  | 5.001898000  |
| H | -3.279104000 | -5.492091000 | -5.001898000 |
| H | -4.485185000 | 6.796265000  | 4.843962000  |
| H | -4.485185000 | -6.796265000 | -4.843962000 |
| H | -5.275998000 | 6.532844000  | 1.336560000  |
| H | -5.275998000 | -6.532844000 | -1.336560000 |
| H | -5.492091000 | 3.279104000  | 5.001898000  |
| H | -5.492091000 | -3.279104000 | -5.001898000 |
| H | -6.532844000 | 5.275998000  | 1.336560000  |
| H | -6.532844000 | -5.275998000 | -1.336560000 |
| H | -6.634099000 | 6.634099000  | 2.489435000  |
| H | -6.634099000 | -6.634099000 | -2.489435000 |
| H | -6.637809000 | 3.171606000  | 3.647307000  |

|    |              |              |              |
|----|--------------|--------------|--------------|
| H  | -6.637809000 | -3.171606000 | -3.647307000 |
| H  | -6.796265000 | 4.485185000  | 4.843962000  |
| H  | -6.796265000 | -4.485185000 | -4.843962000 |
| N  | 0.000000000  | 2.012863000  | 0.000000000  |
| N  | 0.000000000  | -2.012863000 | 0.000000000  |
| N  | 2.012863000  | 0.000000000  | 0.000000000  |
| N  | -2.012863000 | 0.000000000  | 0.000000000  |
| Si | 4.949243000  | 4.949243000  | -3.232641000 |
| Si | 4.949243000  | -4.949243000 | 3.232641000  |
| Si | -4.949243000 | 4.949243000  | 3.232641000  |
| Si | -4.949243000 | -4.949243000 | -3.232641000 |

**57. Pt[A<sub>4</sub>Br<sub>8</sub>]; S = 0 (saddled)**

|    |              |              |              |
|----|--------------|--------------|--------------|
| Pt | 0.000000000  | 0.000000000  | -0.042922000 |
| Br | 1.210259000  | -5.425172000 | -1.988173000 |
| Br | 2.244675000  | 5.034344000  | -2.116860000 |
| Br | 5.186658000  | -2.260476000 | 1.767276000  |
| Br | 5.571603000  | 1.160061000  | 1.667423000  |
| Br | -1.210259000 | 5.425172000  | -1.988173000 |
| Br | -2.244675000 | -5.034344000 | -2.116860000 |
| Br | -5.186658000 | 2.260476000  | 1.767276000  |
| Br | -5.571603000 | -1.160061000 | 1.667423000  |
| C  | 0.276993000  | -4.027171000 | -1.138128000 |
| C  | 0.819813000  | -2.863000000 | -0.476039000 |
| C  | 1.090016000  | 3.871405000  | -1.188351000 |
| C  | 1.404426000  | 2.613151000  | -0.548098000 |
| C  | 2.125394000  | -2.670689000 | 0.037425000  |
| C  | 2.631718000  | -1.409251000 | 0.418880000  |
| C  | 2.659808000  | 2.144394000  | -0.094243000 |
| C  | 2.883006000  | 0.821198000  | 0.350167000  |
| C  | 2.917685000  | -3.823374000 | 0.210854000  |
| C  | 3.521376000  | -7.565301000 | 1.710063000  |
| C  | 3.541520000  | -4.859286000 | 0.387665000  |
| C  | 3.717064000  | 3.075158000  | -0.044196000 |
| C  | 3.916400000  | -1.098562000 | 1.005507000  |
| C  | 4.071910000  | 0.267975000  | 0.960228000  |
| C  | 4.597261000  | 3.920480000  | 0.017087000  |
| C  | 4.845528000  | -7.135989000 | -1.051532000 |
| C  | 5.315715000  | 6.619846000  | 1.134542000  |
| C  | 6.121475000  | -5.884636000 | 1.498001000  |
| C  | 6.323032000  | 5.713907000  | -1.645911000 |
| C  | 7.415815000  | 4.344810000  | 0.928116000  |
| C  | -0.276993000 | 4.027171000  | -1.138128000 |
| C  | -0.819813000 | 2.863000000  | -0.476039000 |
| C  | -1.090016000 | -3.871405000 | -1.188351000 |
| C  | -1.404426000 | -2.613151000 | -0.548098000 |
| C  | -2.125394000 | 2.670689000  | 0.037425000  |
| C  | -2.631718000 | 1.409251000  | 0.418880000  |
| C  | -2.659808000 | -2.144394000 | -0.094243000 |

|   |              |              |              |
|---|--------------|--------------|--------------|
| C | -2.883006000 | -0.821198000 | 0.350167000  |
| C | -2.917685000 | 3.823374000  | 0.210854000  |
| C | -3.521376000 | 7.565301000  | 1.710063000  |
| C | -3.541520000 | 4.859286000  | 0.387665000  |
| C | -3.717064000 | -3.075158000 | -0.044196000 |
| C | -3.916400000 | 1.098562000  | 1.005507000  |
| C | -4.071910000 | -0.267975000 | 0.960228000  |
| C | -4.597261000 | -3.920480000 | 0.017087000  |
| C | -4.845528000 | 7.135989000  | -1.051532000 |
| C | -5.315715000 | -6.619846000 | 1.134542000  |
| C | -6.121475000 | 5.884636000  | 1.498001000  |
| C | -6.323032000 | -5.713907000 | -1.645911000 |
| C | -7.415815000 | -4.344810000 | 0.928116000  |
| H | 2.566982000  | -7.811543000 | 1.223230000  |
| H | 3.298317000  | -7.116374000 | 2.688351000  |
| H | 3.895385000  | -7.369036000 | -1.553514000 |
| H | 4.075952000  | -8.501230000 | 1.877467000  |
| H | 4.418643000  | 7.060163000  | 0.676332000  |
| H | 5.054317000  | 6.298161000  | 2.152645000  |
| H | 5.406168000  | -6.439081000 | -1.689992000 |
| H | 5.423854000  | -8.067925000 | -0.960966000 |
| H | 5.426904000  | 6.137845000  | -2.121629000 |
| H | 5.907210000  | -5.426190000 | 2.474323000  |
| H | 6.087353000  | 7.401489000  | 1.206179000  |
| H | 6.661975000  | 4.864588000  | -2.255340000 |
| H | 6.675121000  | -5.153404000 | 0.892046000  |
| H | 6.769270000  | -6.758349000 | 1.664776000  |
| H | 7.110692000  | 6.482489000  | -1.650481000 |
| H | 7.163555000  | 4.026708000  | 1.950131000  |
| H | 7.728822000  | 3.455944000  | 0.362332000  |
| H | 8.268680000  | 5.037678000  | 0.986556000  |
| H | -2.566982000 | 7.811543000  | 1.223230000  |
| H | -3.298317000 | 7.116374000  | 2.688351000  |
| H | -3.895385000 | 7.369036000  | -1.553514000 |
| H | -4.075952000 | 8.501230000  | 1.877467000  |
| H | -4.418643000 | -7.060163000 | 0.676332000  |
| H | -5.054317000 | -6.298161000 | 2.152645000  |
| H | -5.406168000 | 6.439081000  | -1.689992000 |
| H | -5.423854000 | 8.067925000  | -0.960966000 |
| H | -5.426904000 | -6.137845000 | -2.121629000 |
| H | -5.907210000 | 5.426190000  | 2.474323000  |
| H | -6.087353000 | -7.401489000 | 1.206179000  |
| H | -6.661975000 | -4.864588000 | -2.255340000 |
| H | -6.675121000 | 5.153404000  | 0.892046000  |
| H | -6.769270000 | 6.758349000  | 1.664776000  |
| H | -7.110692000 | -6.482489000 | -1.650481000 |
| H | -7.163555000 | -4.026708000 | 1.950131000  |
| H | -7.728822000 | -3.455944000 | 0.362332000  |
| H | -8.268680000 | -5.037678000 | 0.986556000  |
| N | 0.215589000  | 1.985541000  | -0.233849000 |
| N | 2.000914000  | -0.216434000 | 0.114747000  |

|    |              |              |              |
|----|--------------|--------------|--------------|
| N  | -0.215589000 | -1.985541000 | -0.233849000 |
| N  | -2.000914000 | 0.216434000  | 0.114747000  |
| Si | 4.522074000  | -6.384802000 | 0.642525000  |
| Si | 5.934219000  | 5.168460000  | 0.111835000  |
| Si | -4.522074000 | 6.384802000  | 0.642525000  |
| Si | -5.934219000 | -5.168460000 | 0.111835000  |

**58. Pt[A<sub>4</sub>Br<sub>8</sub>]; S = 0 (ruffled)**

|    |              |              |              |
|----|--------------|--------------|--------------|
| Pt | 0.000000000  | 0.000000000  | 0.000000000  |
| Br | 1.634003000  | 5.765038000  | -0.554910000 |
| Br | 1.634003000  | -5.765038000 | 0.554910000  |
| Br | 5.765038000  | 1.634003000  | -0.554910000 |
| Br | 5.765038000  | -1.634003000 | 0.554910000  |
| Br | -1.634003000 | 5.765038000  | 0.554910000  |
| Br | -1.634003000 | -5.765038000 | -0.554910000 |
| Br | -5.765038000 | 1.634003000  | 0.554910000  |
| Br | -5.765038000 | -1.634003000 | -0.554910000 |
| C  | 0.638904000  | 4.193514000  | -0.257538000 |
| C  | 0.638904000  | -4.193514000 | 0.257538000  |
| C  | 1.051568000  | 2.814214000  | -0.388426000 |
| C  | 1.051568000  | -2.814214000 | 0.388426000  |
| C  | 2.335173000  | 2.335173000  | -0.744980000 |
| C  | 2.335173000  | -2.335173000 | 0.744980000  |
| C  | 2.814214000  | 1.051568000  | -0.388426000 |
| C  | 2.814214000  | -1.051568000 | 0.388426000  |
| C  | 3.172213000  | 3.172213000  | -1.505374000 |
| C  | 3.172213000  | -3.172213000 | 1.505374000  |
| C  | 3.849996000  | 3.849996000  | -2.264888000 |
| C  | 3.849996000  | -3.849996000 | 2.264888000  |
| C  | 3.868793000  | 6.073245000  | -4.283946000 |
| C  | 3.868793000  | -6.073245000 | 4.283946000  |
| C  | 4.193514000  | 0.638904000  | -0.257538000 |
| C  | 4.193514000  | -0.638904000 | 0.257538000  |
| C  | 5.946784000  | 5.946784000  | -1.986607000 |
| C  | 5.946784000  | -5.946784000 | 1.986607000  |
| C  | 6.073245000  | 3.868793000  | -4.283946000 |
| C  | 6.073245000  | -3.868793000 | 4.283946000  |
| C  | -0.638904000 | 4.193514000  | 0.257538000  |
| C  | -0.638904000 | -4.193514000 | -0.257538000 |
| C  | -1.051568000 | 2.814214000  | 0.388426000  |
| C  | -1.051568000 | -2.814214000 | -0.388426000 |
| C  | -2.335173000 | 2.335173000  | 0.744980000  |
| C  | -2.335173000 | -2.335173000 | -0.744980000 |
| C  | -2.814214000 | 1.051568000  | 0.388426000  |
| C  | -2.814214000 | -1.051568000 | -0.388426000 |
| C  | -3.172213000 | 3.172213000  | 1.505374000  |
| C  | -3.172213000 | -3.172213000 | -1.505374000 |
| C  | -3.849996000 | 3.849996000  | 2.264888000  |
| C  | -3.849996000 | -3.849996000 | -2.264888000 |

|    |              |              |              |
|----|--------------|--------------|--------------|
| C  | -3.868793000 | 6.073245000  | 4.283946000  |
| C  | -3.868793000 | -6.073245000 | -4.283946000 |
| C  | -4.193514000 | 0.638904000  | 0.257538000  |
| C  | -4.193514000 | -0.638904000 | -0.257538000 |
| C  | -5.946784000 | 5.946784000  | 1.986607000  |
| C  | -5.946784000 | -5.946784000 | -1.986607000 |
| C  | -6.073245000 | 3.868793000  | 4.283946000  |
| C  | -6.073245000 | -3.868793000 | -4.283946000 |
| H  | 3.170583000  | 6.636673000  | -3.648130000 |
| H  | 3.170583000  | -6.636673000 | 3.648130000  |
| H  | 3.275190000  | 5.487703000  | -5.000218000 |
| H  | 3.275190000  | -5.487703000 | 5.000218000  |
| H  | 4.481233000  | 6.792644000  | -4.848294000 |
| H  | 4.481233000  | -6.792644000 | 4.848294000  |
| H  | 5.280589000  | 6.537450000  | -1.341832000 |
| H  | 5.280589000  | -6.537450000 | 1.341832000  |
| H  | 5.487703000  | 3.275190000  | -5.000218000 |
| H  | 5.487703000  | -3.275190000 | 5.000218000  |
| H  | 6.537450000  | 5.280589000  | -1.341832000 |
| H  | 6.537450000  | -5.280589000 | 1.341832000  |
| H  | 6.635941000  | 6.635941000  | -2.498139000 |
| H  | 6.635941000  | -6.635941000 | 2.498139000  |
| H  | 6.636673000  | 3.170583000  | -3.648130000 |
| H  | 6.636673000  | -3.170583000 | 3.648130000  |
| H  | 6.792644000  | 4.481233000  | -4.848294000 |
| H  | 6.792644000  | -4.481233000 | 4.848294000  |
| H  | -3.170583000 | 6.636673000  | 3.648130000  |
| H  | -3.170583000 | -6.636673000 | -3.648130000 |
| H  | -3.275190000 | 5.487703000  | 5.000218000  |
| H  | -3.275190000 | -5.487703000 | -5.000218000 |
| H  | -4.481233000 | 6.792644000  | 4.848294000  |
| H  | -4.481233000 | -6.792644000 | -4.848294000 |
| H  | -5.280589000 | 6.537450000  | 1.341832000  |
| H  | -5.280589000 | -6.537450000 | -1.341832000 |
| H  | -5.487703000 | 3.275190000  | 5.000218000  |
| H  | -5.487703000 | -3.275190000 | -5.000218000 |
| H  | -6.537450000 | 5.280589000  | 1.341832000  |
| H  | -6.537450000 | -5.280589000 | -1.341832000 |
| H  | -6.635941000 | 6.635941000  | 2.498139000  |
| H  | -6.635941000 | -6.635941000 | -2.498139000 |
| H  | -6.636673000 | 3.170583000  | 3.648130000  |
| H  | -6.636673000 | -3.170583000 | -3.648130000 |
| H  | -6.792644000 | 4.481233000  | 4.848294000  |
| H  | -6.792644000 | -4.481233000 | -4.848294000 |
| N  | 0.000000000  | 2.013189000  | 0.000000000  |
| N  | 0.000000000  | -2.013189000 | 0.000000000  |
| N  | 2.013189000  | 0.000000000  | 0.000000000  |
| N  | -2.013189000 | 0.000000000  | 0.000000000  |
| Si | 4.949410000  | 4.949410000  | -3.233585000 |
| Si | 4.949410000  | -4.949410000 | 3.233585000  |
| Si | -4.949410000 | 4.949410000  | 3.233585000  |

Si -4.949410000 -4.949410000 -3.233585000

**59. Zn[A<sub>4</sub>Br<sub>8</sub>]; S = 0 (saddled)**

|    |              |              |              |
|----|--------------|--------------|--------------|
| Zn | 0.000000000  | 0.000000000  | -0.005049000 |
| Br | 1.142292000  | -5.407794000 | -2.064042000 |
| Br | 2.310027000  | 5.027177000  | -2.051324000 |
| Br | 5.211928000  | -2.315276000 | 1.734345000  |
| Br | 5.595719000  | 1.107077000  | 1.734083000  |
| Br | -1.142292000 | 5.407794000  | -2.064042000 |
| Br | -2.310027000 | -5.027177000 | -2.051324000 |
| Br | -5.211928000 | 2.315276000  | 1.734345000  |
| Br | -5.595719000 | -1.107077000 | 1.734083000  |
| C  | 0.247168000  | -4.012909000 | -1.166292000 |
| C  | 0.805098000  | -2.857999000 | -0.499980000 |
| C  | 1.126028000  | 3.861092000  | -1.162010000 |
| C  | 1.414186000  | 2.611929000  | -0.494554000 |
| C  | 2.129940000  | -2.671094000 | -0.014159000 |
| C  | 2.649623000  | -1.420017000 | 0.410441000  |
| C  | 2.664352000  | 2.138119000  | -0.005332000 |
| C  | 2.896843000  | 0.801938000  | 0.413893000  |
| C  | 2.941957000  | -3.817239000 | 0.080828000  |
| C  | 3.601823000  | -4.841537000 | 0.182715000  |
| C  | 3.675605000  | -7.611028000 | 1.360614000  |
| C  | 3.705370000  | 3.080086000  | 0.099354000  |
| C  | 3.937715000  | -1.134381000 | 1.004920000  |
| C  | 4.090744000  | 0.238064000  | 1.006449000  |
| C  | 4.569654000  | 3.937738000  | 0.210896000  |
| C  | 4.890852000  | -7.015205000 | -1.419762000 |
| C  | 5.226574000  | 6.623729000  | 1.400399000  |
| C  | 6.240077000  | -5.877961000 | 1.144729000  |
| C  | 6.308396000  | 5.787951000  | -1.373098000 |
| C  | 7.361070000  | 4.380466000  | 1.196041000  |
| C  | -0.247168000 | 4.012909000  | -1.166292000 |
| C  | -0.805098000 | 2.857999000  | -0.499980000 |
| C  | -1.126028000 | -3.861092000 | -1.162010000 |
| C  | -1.414186000 | -2.611929000 | -0.494554000 |
| C  | -2.129940000 | 2.671094000  | -0.014159000 |
| C  | -2.649623000 | 1.420017000  | 0.410441000  |
| C  | -2.664352000 | -2.138119000 | -0.005332000 |
| C  | -2.896843000 | -0.801938000 | 0.413893000  |
| C  | -2.941957000 | 3.817239000  | 0.080828000  |
| C  | -3.601823000 | 4.841537000  | 0.182715000  |
| C  | -3.675605000 | 7.611028000  | 1.360614000  |
| C  | -3.705370000 | -3.080086000 | 0.099354000  |
| C  | -3.937715000 | 1.134381000  | 1.004920000  |
| C  | -4.090744000 | -0.238064000 | 1.006449000  |
| C  | -4.569654000 | -3.937738000 | 0.210896000  |
| C  | -4.890852000 | 7.015205000  | -1.419762000 |
| C  | -5.226574000 | -6.623729000 | 1.400399000  |



|    |              |              |              |
|----|--------------|--------------|--------------|
| C  | -6.240077000 | 5.877961000  | 1.144729000  |
| C  | -6.308396000 | -5.787951000 | -1.373098000 |
| C  | -7.361070000 | -4.380466000 | 1.196041000  |
| H  | 2.707418000  | -7.846908000 | 0.896417000  |
| H  | 3.482663000  | -7.218267000 | 2.368999000  |
| H  | 3.927001000  | -7.238581000 | -1.899477000 |
| H  | 4.250014000  | -8.544980000 | 1.457313000  |
| H  | 4.335329000  | 7.062680000  | 0.929755000  |
| H  | 4.945550000  | 6.279282000  | 2.405735000  |
| H  | 5.416820000  | -6.276533000 | -2.040522000 |
| H  | 5.418698000  | 6.213437000  | -1.859340000 |
| H  | 5.486719000  | -7.940234000 | -1.398452000 |
| H  | 5.987009000  | 7.412612000  | 1.505072000  |
| H  | 6.056529000  | -5.483153000 | 2.154539000  |
| H  | 6.669559000  | 4.955439000  | -1.992834000 |
| H  | 6.756687000  | -5.100871000 | 0.563839000  |
| H  | 6.908771000  | -6.747330000 | 1.233592000  |
| H  | 7.088023000  | 6.564159000  | -1.343272000 |
| H  | 7.088208000  | 4.029055000  | 2.201681000  |
| H  | 7.704773000  | 3.513776000  | 0.613836000  |
| H  | 8.199446000  | 5.086163000  | 1.295853000  |
| H  | -2.707418000 | 7.846908000  | 0.896417000  |
| H  | -3.482663000 | 7.218267000  | 2.368999000  |
| H  | -3.927001000 | 7.238581000  | -1.899477000 |
| H  | -4.250014000 | 8.544980000  | 1.457313000  |
| H  | -4.335329000 | -7.062680000 | 0.929755000  |
| H  | -4.945550000 | -6.279282000 | 2.405735000  |
| H  | -5.416820000 | 6.276533000  | -2.040522000 |
| H  | -5.418698000 | -6.213437000 | -1.859340000 |
| H  | -5.486719000 | 7.940234000  | -1.398452000 |
| H  | -5.987009000 | -7.412612000 | 1.505072000  |
| H  | -6.056529000 | 5.483153000  | 2.154539000  |
| H  | -6.669559000 | -4.955439000 | -1.992834000 |
| H  | -6.756687000 | 5.100871000  | 0.563839000  |
| H  | -6.908771000 | 6.747330000  | 1.233592000  |
| H  | -7.088023000 | -6.564159000 | -1.343272000 |
| H  | -7.088208000 | -4.029055000 | 2.201681000  |
| H  | -7.704773000 | -3.513776000 | 0.613836000  |
| H  | -8.199446000 | -5.086163000 | 1.295853000  |
| N  | 0.221607000  | 1.992492000  | -0.203515000 |
| N  | 2.022125000  | -0.225059000 | 0.145175000  |
| N  | -0.221607000 | -1.992492000 | -0.203515000 |
| N  | -2.022125000 | 0.225059000  | 0.145175000  |
| Si | 4.617784000  | -6.358493000 | 0.321972000  |
| Si | 5.886554000  | 5.200670000  | 0.363752000  |
| Si | -4.617784000 | 6.358493000  | 0.321972000  |
| Si | -5.886554000 | -5.200670000 | 0.363752000  |

60. Zn[A<sub>4</sub>Br<sub>8</sub>]; S = 0 (ruffled)

|    |              |              |              |
|----|--------------|--------------|--------------|
| Zn | 0.000000000  | 0.000000000  | 0.000000000  |
| Br | 1.653840000  | 5.804802000  | -0.461906000 |
| Br | 1.653840000  | -5.804802000 | 0.461906000  |
| Br | 5.804802000  | 1.653840000  | -0.461906000 |
| Br | 5.804802000  | -1.653840000 | 0.461906000  |
| Br | -1.653840000 | 5.804802000  | 0.461906000  |
| Br | -1.653840000 | -5.804802000 | -0.461906000 |
| Br | -5.804802000 | 1.653840000  | 0.461906000  |
| Br | -5.804802000 | -1.653840000 | -0.461906000 |
| C  | 0.653382000  | 4.224223000  | -0.222894000 |
| C  | 0.653382000  | -4.224223000 | 0.222894000  |
| C  | 1.065111000  | 2.842332000  | -0.335937000 |
| C  | 1.065111000  | -2.842332000 | 0.335937000  |
| C  | 2.361759000  | 2.361759000  | -0.661176000 |
| C  | 2.361759000  | -2.361759000 | 0.661176000  |
| C  | 2.842332000  | 1.065111000  | -0.335937000 |
| C  | 2.842332000  | -1.065111000 | 0.335937000  |
| C  | 3.217112000  | 3.217112000  | -1.379646000 |
| C  | 3.217112000  | -3.217112000 | 1.379646000  |
| C  | 3.914203000  | 3.914203000  | -2.103690000 |
| C  | 3.914203000  | -3.914203000 | 2.103690000  |
| C  | 3.992672000  | 6.197538000  | -4.053184000 |
| C  | 3.992672000  | -6.197538000 | 4.053184000  |
| C  | 4.224223000  | 0.653382000  | -0.222894000 |
| C  | 4.224223000  | -0.653382000 | 0.222894000  |
| C  | 5.999524000  | 5.999524000  | -1.698335000 |
| C  | 5.999524000  | -5.999524000 | 1.698335000  |
| C  | 6.197538000  | 3.992672000  | -4.053184000 |
| C  | 6.197538000  | -3.992672000 | 4.053184000  |
| C  | -0.653382000 | 4.224223000  | 0.222894000  |
| C  | -0.653382000 | -4.224223000 | -0.222894000 |
| C  | -1.065111000 | 2.842332000  | 0.335937000  |
| C  | -1.065111000 | -2.842332000 | -0.335937000 |
| C  | -2.361759000 | 2.361759000  | 0.661176000  |
| C  | -2.361759000 | -2.361759000 | -0.661176000 |
| C  | -2.842332000 | 1.065111000  | 0.335937000  |
| C  | -2.842332000 | -1.065111000 | -0.335937000 |
| C  | -3.217112000 | 3.217112000  | 1.379646000  |
| C  | -3.217112000 | -3.217112000 | -1.379646000 |
| C  | -3.914203000 | 3.914203000  | 2.103690000  |
| C  | -3.914203000 | -3.914203000 | -2.103690000 |
| C  | -3.992672000 | 6.197538000  | 4.053184000  |
| C  | -3.992672000 | -6.197538000 | -4.053184000 |
| C  | -4.224223000 | 0.653382000  | 0.222894000  |
| C  | -4.224223000 | -0.653382000 | -0.222894000 |
| C  | -5.999524000 | 5.999524000  | 1.698335000  |
| C  | -5.999524000 | -5.999524000 | -1.698335000 |
| C  | -6.197538000 | 3.992672000  | 4.053184000  |

|    |              |              |              |
|----|--------------|--------------|--------------|
| C  | -6.197538000 | -3.992672000 | -4.053184000 |
| H  | 3.273702000  | 6.739328000  | -3.421649000 |
| H  | 3.273702000  | -6.739328000 | 3.421649000  |
| H  | 3.422862000  | 5.634951000  | -4.806225000 |
| H  | 3.422862000  | -5.634951000 | 4.806225000  |
| H  | 4.621141000  | 6.935305000  | -4.574537000 |
| H  | 4.621141000  | -6.935305000 | 4.574537000  |
| H  | 5.313074000  | 6.569913000  | -1.056566000 |
| H  | 5.313074000  | -6.569913000 | 1.056566000  |
| H  | 5.634951000  | 3.422862000  | -4.806225000 |
| H  | 5.634951000  | -3.422862000 | 4.806225000  |
| H  | 6.569913000  | 5.313074000  | -1.056566000 |
| H  | 6.569913000  | -5.313074000 | 1.056566000  |
| H  | 6.703910000  | 6.703910000  | -2.166494000 |
| H  | 6.703910000  | -6.703910000 | 2.166494000  |
| H  | 6.739328000  | 3.273702000  | -3.421649000 |
| H  | 6.739328000  | -3.273702000 | 3.421649000  |
| H  | 6.935305000  | 4.621141000  | -4.574537000 |
| H  | 6.935305000  | -4.621141000 | 4.574537000  |
| H  | -3.273702000 | 6.739328000  | 3.421649000  |
| H  | -3.273702000 | -6.739328000 | -3.421649000 |
| H  | -3.422862000 | 5.634951000  | 4.806225000  |
| H  | -3.422862000 | -5.634951000 | -4.806225000 |
| H  | -4.621141000 | 6.935305000  | 4.574537000  |
| H  | -4.621141000 | -6.935305000 | -4.574537000 |
| H  | -5.313074000 | 6.569913000  | 1.056566000  |
| H  | -5.313074000 | -6.569913000 | -1.056566000 |
| H  | -5.634951000 | 3.422862000  | 4.806225000  |
| H  | -5.634951000 | -3.422862000 | -4.806225000 |
| H  | -6.569913000 | 5.313074000  | 1.056566000  |
| H  | -6.569913000 | -5.313074000 | -1.056566000 |
| H  | -6.703910000 | 6.703910000  | 2.166494000  |
| H  | -6.703910000 | -6.703910000 | -2.166494000 |
| H  | -6.739328000 | 3.273702000  | 3.421649000  |
| H  | -6.739328000 | -3.273702000 | -3.421649000 |
| H  | -6.935305000 | 4.621141000  | 4.574537000  |
| H  | -6.935305000 | -4.621141000 | -4.574537000 |
| N  | 0.000000000  | 2.040294000  | 0.000000000  |
| N  | 0.000000000  | -2.040294000 | 0.000000000  |
| N  | 2.040294000  | 0.000000000  | 0.000000000  |
| N  | -2.040294000 | 0.000000000  | 0.000000000  |
| Si | 5.041422000  | 5.041422000  | -3.005452000 |
| Si | 5.041422000  | -5.041422000 | 3.005452000  |
| Si | -5.041422000 | 5.041422000  | 3.005452000  |
| Si | -5.041422000 | -5.041422000 | -3.005452000 |

61. Cu[Ph<sub>4</sub>Bz<sub>8</sub>]; S = ½ (saddled)

|   |              |              |              |
|---|--------------|--------------|--------------|
| C | 0.000000000  | 3.402148000  | 0.000000000  |
| C | 0.000000000  | 4.891312000  | 0.000000000  |
| C | 0.000000000  | 7.696899000  | 0.000000000  |
| C | 0.000000000  | -3.402148000 | 0.000000000  |
| C | 0.000000000  | -4.891312000 | 0.000000000  |
| C | 0.000000000  | -7.696899000 | 0.000000000  |
| C | 0.781663000  | 6.995481000  | -0.922122000 |
| C | 0.781663000  | -6.995481000 | 0.922122000  |
| C | 0.783650000  | 5.600646000  | -0.918384000 |
| C | 0.783650000  | -5.600646000 | 0.918384000  |
| C | 1.162675000  | 2.743363000  | 0.415038000  |
| C | 1.162675000  | -2.743363000 | -0.415038000 |
| C | 2.349462000  | 3.350681000  | 1.003298000  |
| C | 2.349462000  | -3.350681000 | -1.003298000 |
| C | 2.601540000  | 4.604938000  | 1.583657000  |
| C | 2.601540000  | -4.604938000 | -1.583657000 |
| C | 2.743363000  | 1.162675000  | 0.415038000  |
| C | 2.743363000  | -1.162675000 | -0.415038000 |
| C | 3.350681000  | 2.349462000  | 1.003298000  |
| C | 3.350681000  | -2.349462000 | -1.003298000 |
| C | 3.402148000  | 0.000000000  | 0.000000000  |
| C | 3.849361000  | 4.842772000  | 2.148171000  |
| C | 3.849361000  | -4.842772000 | -2.148171000 |
| C | 4.604938000  | 2.601540000  | 1.583657000  |
| C | 4.604938000  | -2.601540000 | -1.583657000 |
| C | 4.842772000  | 3.849361000  | 2.148171000  |
| C | 4.842772000  | -3.849361000 | -2.148171000 |
| C | 4.891312000  | 0.000000000  | 0.000000000  |
| C | 5.600646000  | 0.783650000  | -0.918384000 |
| C | 5.600646000  | -0.783650000 | 0.918384000  |
| C | 6.995481000  | 0.781663000  | -0.922122000 |
| C | 6.995481000  | -0.781663000 | 0.922122000  |
| C | 7.696899000  | 0.000000000  | 0.000000000  |
| C | -0.781663000 | 6.995481000  | 0.922122000  |
| C | -0.781663000 | -6.995481000 | -0.922122000 |
| C | -0.783650000 | 5.600646000  | 0.918384000  |
| C | -0.783650000 | -5.600646000 | -0.918384000 |
| C | -1.162675000 | 2.743363000  | -0.415038000 |
| C | -1.162675000 | -2.743363000 | 0.415038000  |
| C | -2.349462000 | 3.350681000  | -1.003298000 |
| C | -2.349462000 | -3.350681000 | 1.003298000  |
| C | -2.601540000 | 4.604938000  | -1.583657000 |
| C | -2.601540000 | -4.604938000 | 1.583657000  |
| C | -2.743363000 | 1.162675000  | -0.415038000 |
| C | -2.743363000 | -1.162675000 | 0.415038000  |
| C | -3.350681000 | 2.349462000  | -1.003298000 |
| C | -3.350681000 | -2.349462000 | 1.003298000  |

|    |              |              |              |
|----|--------------|--------------|--------------|
| C  | -3.402148000 | 0.000000000  | 0.000000000  |
| C  | -3.849361000 | 4.842772000  | -2.148171000 |
| C  | -3.849361000 | -4.842772000 | 2.148171000  |
| C  | -4.604938000 | 2.601540000  | -1.583657000 |
| C  | -4.604938000 | -2.601540000 | 1.583657000  |
| C  | -4.842772000 | 3.849361000  | -2.148171000 |
| C  | -4.842772000 | -3.849361000 | 2.148171000  |
| C  | -4.891312000 | 0.000000000  | 0.000000000  |
| C  | -5.600646000 | 0.783650000  | 0.918384000  |
| C  | -5.600646000 | -0.783650000 | -0.918384000 |
| C  | -6.995481000 | 0.781663000  | 0.922122000  |
| C  | -6.995481000 | -0.781663000 | -0.922122000 |
| C  | -7.696899000 | 0.000000000  | 0.000000000  |
| Cu | 0.000000000  | 0.000000000  | 0.000000000  |
| H  | 0.000000000  | 8.786403000  | 0.000000000  |
| H  | 0.000000000  | -8.786403000 | 0.000000000  |
| H  | 1.392944000  | 7.535499000  | -1.643785000 |
| H  | 1.392944000  | -7.535499000 | 1.643785000  |
| H  | 1.396283000  | 5.046001000  | -1.627794000 |
| H  | 1.396283000  | -5.046001000 | 1.627794000  |
| H  | 1.838586000  | 5.377259000  | 1.617842000  |
| H  | 1.838586000  | -5.377259000 | -1.617842000 |
| H  | 4.051298000  | 5.808205000  | 2.609962000  |
| H  | 4.051298000  | -5.808205000 | -2.609962000 |
| H  | 5.046001000  | 1.396283000  | -1.627794000 |
| H  | 5.046001000  | -1.396283000 | 1.627794000  |
| H  | 5.377259000  | 1.838586000  | 1.617842000  |
| H  | 5.377259000  | -1.838586000 | -1.617842000 |
| H  | 5.808205000  | 4.051298000  | 2.609962000  |
| H  | 5.808205000  | -4.051298000 | -2.609962000 |
| H  | 7.535499000  | 1.392944000  | -1.643785000 |
| H  | 7.535499000  | -1.392944000 | 1.643785000  |
| H  | 8.786403000  | 0.000000000  | 0.000000000  |
| H  | -1.392944000 | 7.535499000  | 1.643785000  |
| H  | -1.392944000 | -7.535499000 | -1.643785000 |
| H  | -1.396283000 | 5.046001000  | 1.627794000  |
| H  | -1.396283000 | -5.046001000 | -1.627794000 |
| H  | -1.838586000 | 5.377259000  | -1.617842000 |
| H  | -1.838586000 | -5.377259000 | 1.617842000  |
| H  | -4.051298000 | 5.808205000  | -2.609962000 |
| H  | -4.051298000 | -5.808205000 | 2.609962000  |
| H  | -5.046001000 | 1.396283000  | 1.627794000  |
| H  | -5.046001000 | -1.396283000 | -1.627794000 |
| H  | -5.377259000 | 1.838586000  | -1.617842000 |
| H  | -5.377259000 | -1.838586000 | 1.617842000  |
| H  | -5.808205000 | 4.051298000  | -2.609962000 |
| H  | -5.808205000 | -4.051298000 | 2.609962000  |
| H  | -7.535499000 | 1.392944000  | 1.643785000  |
| H  | -7.535499000 | -1.392944000 | -1.643785000 |
| H  | -8.786403000 | 0.000000000  | 0.000000000  |
| N  | 1.407067000  | 1.407067000  | 0.181882000  |

|   |              |              |              |
|---|--------------|--------------|--------------|
| N | 1.407067000  | -1.407067000 | -0.181882000 |
| N | -1.407067000 | 1.407067000  | -0.181882000 |
| N | -1.407067000 | -1.407067000 | 0.181882000  |

**62. Cu[Ph<sub>4</sub>Bz<sub>8</sub>]; S = ½ (ruffled)**

|    |              |              |              |
|----|--------------|--------------|--------------|
| Cu | 0.000000000  | 0.000000000  | 0.001551000  |
| C  | 0.000000000  | 3.275141000  | -0.751673000 |
| C  | 0.000000000  | 4.676255000  | -1.261726000 |
| C  | 0.000000000  | 4.925682000  | -2.636527000 |
| C  | 0.000000000  | 5.755875000  | -0.369428000 |
| C  | 0.000000000  | 6.237568000  | -3.116849000 |
| C  | 0.000000000  | 7.065646000  | -0.845127000 |
| C  | 0.000000000  | 7.309979000  | -2.221798000 |
| C  | 0.000000000  | -3.275141000 | -0.751673000 |
| C  | 0.000000000  | -4.676255000 | -1.261726000 |
| C  | 0.000000000  | -4.925682000 | -2.636527000 |
| C  | 0.000000000  | -5.755875000 | -0.369428000 |
| C  | 0.000000000  | -6.237568000 | -3.116849000 |
| C  | 0.000000000  | -7.065646000 | -0.845127000 |
| C  | 0.000000000  | -7.309979000 | -2.221798000 |
| C  | 1.239163000  | 2.692502000  | -0.448832000 |
| C  | 1.239163000  | -2.692502000 | -0.448832000 |
| C  | 2.517486000  | 3.393642000  | -0.345065000 |
| C  | 2.517486000  | -3.393642000 | -0.345065000 |
| C  | 2.692782000  | 1.239146000  | 0.450633000  |
| C  | 2.692782000  | -1.239146000 | 0.450633000  |
| C  | 2.970392000  | 4.660261000  | -0.752829000 |
| C  | 2.970392000  | -4.660261000 | -0.752829000 |
| C  | 3.275560000  | 0.000000000  | 0.753271000  |
| C  | 3.394119000  | 2.517257000  | 0.345612000  |
| C  | 3.394119000  | -2.517257000 | 0.345612000  |
| C  | 4.247899000  | 5.071791000  | -0.390148000 |
| C  | 4.247899000  | -5.071791000 | -0.390148000 |
| C  | 4.661219000  | 2.970039000  | 0.752021000  |
| C  | 4.661219000  | -2.970039000 | 0.752021000  |
| C  | 4.677106000  | 0.000000000  | 1.262191000  |
| C  | 4.927853000  | 0.000000000  | 2.636752000  |
| C  | 5.072952000  | 4.247073000  | 0.387913000  |
| C  | 5.072952000  | -4.247073000 | 0.387913000  |
| C  | 5.755897000  | 0.000000000  | 0.368863000  |
| C  | 6.240209000  | 0.000000000  | 3.115804000  |
| C  | 7.066138000  | 0.000000000  | 0.843289000  |
| C  | 7.311780000  | 0.000000000  | 2.219733000  |
| C  | -1.239163000 | 2.692502000  | -0.448832000 |
| C  | -1.239163000 | -2.692502000 | -0.448832000 |
| C  | -2.517486000 | 3.393642000  | -0.345065000 |
| C  | -2.517486000 | -3.393642000 | -0.345065000 |
| C  | -2.692782000 | 1.239146000  | 0.450633000  |
| C  | -2.692782000 | -1.239146000 | 0.450633000  |

|   |              |              |              |
|---|--------------|--------------|--------------|
| C | -2.970392000 | 4.660261000  | -0.752829000 |
| C | -2.970392000 | -4.660261000 | -0.752829000 |
| C | -3.275560000 | 0.000000000  | 0.753271000  |
| C | -3.394119000 | 2.517257000  | 0.345612000  |
| C | -3.394119000 | -2.517257000 | 0.345612000  |
| C | -4.247899000 | 5.071791000  | -0.390148000 |
| C | -4.247899000 | -5.071791000 | -0.390148000 |
| C | -4.661219000 | 2.970039000  | 0.752021000  |
| C | -4.661219000 | -2.970039000 | 0.752021000  |
| C | -4.677106000 | 0.000000000  | 1.262191000  |
| C | -4.927853000 | 0.000000000  | 2.636752000  |
| C | -5.072952000 | 4.247073000  | 0.387913000  |
| C | -5.072952000 | -4.247073000 | 0.387913000  |
| C | -5.755897000 | 0.000000000  | 0.368863000  |
| C | -6.240209000 | 0.000000000  | 3.115804000  |
| C | -7.066138000 | 0.000000000  | 0.843289000  |
| C | -7.311780000 | 0.000000000  | 2.219733000  |
| H | 0.000000000  | 4.083670000  | -3.327392000 |
| H | 0.000000000  | 5.554013000  | 0.700435000  |
| H | 0.000000000  | 6.420973000  | -4.190289000 |
| H | 0.000000000  | 7.896814000  | -0.141621000 |
| H | 0.000000000  | 8.333272000  | -2.595785000 |
| H | 0.000000000  | -4.083670000 | -3.327392000 |
| H | 0.000000000  | -5.554013000 | 0.700435000  |
| H | 0.000000000  | -6.420973000 | -4.190289000 |
| H | 0.000000000  | -7.896814000 | -0.141621000 |
| H | 0.000000000  | -8.333272000 | -2.595785000 |
| H | 2.353177000  | 5.319006000  | -1.353759000 |
| H | 2.353177000  | -5.319006000 | -1.353759000 |
| H | 4.086536000  | 0.000000000  | 3.328470000  |
| H | 4.602299000  | 6.051666000  | -0.706969000 |
| H | 4.602299000  | -6.051666000 | -0.706969000 |
| H | 5.320279000  | 2.353016000  | 1.352807000  |
| H | 5.320279000  | -2.353016000 | 1.352807000  |
| H | 5.552998000  | 0.000000000  | -0.700805000 |
| H | 6.053231000  | 4.601367000  | 0.703622000  |
| H | 6.053231000  | -4.601367000 | 0.703622000  |
| H | 6.424636000  | 0.000000000  | 4.189075000  |
| H | 7.896658000  | 0.000000000  | 0.138964000  |
| H | 8.335436000  | 0.000000000  | 2.592739000  |
| H | -2.353177000 | 5.319006000  | -1.353759000 |
| H | -2.353177000 | -5.319006000 | -1.353759000 |
| H | -4.086536000 | 0.000000000  | 3.328470000  |
| H | -4.602299000 | 6.051666000  | -0.706969000 |
| H | -4.602299000 | -6.051666000 | -0.706969000 |
| H | -5.320279000 | 2.353016000  | 1.352807000  |
| H | -5.320279000 | -2.353016000 | 1.352807000  |
| H | -5.552998000 | 0.000000000  | -0.700805000 |
| H | -6.053231000 | 4.601367000  | 0.703622000  |
| H | -6.053231000 | -4.601367000 | 0.703622000  |
| H | -6.424636000 | 0.000000000  | 4.189075000  |

|   |              |              |             |
|---|--------------|--------------|-------------|
| H | -7.896658000 | 0.000000000  | 0.138964000 |
| H | -8.335436000 | 0.000000000  | 2.592739000 |
| N | 1.402286000  | 1.402224000  | 0.001190000 |
| N | 1.402286000  | -1.402224000 | 0.001190000 |
| N | -1.402286000 | 1.402224000  | 0.001190000 |
| N | -1.402286000 | -1.402224000 | 0.001190000 |

**63. Ni[Ph<sub>4</sub>Bz<sub>8</sub>]; S = 0 (saddled)**

|    |              |              |              |
|----|--------------|--------------|--------------|
| Ni | 0.000000000  | 0.000000000  | 0.000000000  |
| C  | 0.000000000  | 3.370803000  | 0.000000000  |
| C  | 0.000000000  | 4.858951000  | 0.000000000  |
| C  | 0.000000000  | 7.664358000  | 0.000000000  |
| C  | 0.000000000  | -3.370803000 | 0.000000000  |
| C  | 0.000000000  | -4.858951000 | 0.000000000  |
| C  | 0.000000000  | -7.664358000 | 0.000000000  |
| C  | 0.849179000  | 6.962944000  | -0.860290000 |
| C  | 0.849179000  | -6.962944000 | 0.860290000  |
| C  | 0.850864000  | 5.568055000  | -0.856617000 |
| C  | 0.850864000  | -5.568055000 | 0.856617000  |
| C  | 1.116231000  | 2.694199000  | 0.484814000  |
| C  | 1.116231000  | -2.694199000 | -0.484814000 |
| C  | 2.278456000  | 3.278046000  | 1.131670000  |
| C  | 2.278456000  | -3.278046000 | -1.131670000 |
| C  | 2.511158000  | 4.517151000  | 1.749936000  |
| C  | 2.511158000  | -4.517151000 | -1.749936000 |
| C  | 2.694199000  | 1.116231000  | 0.484814000  |
| C  | 2.694199000  | -1.116231000 | -0.484814000 |
| C  | 3.278046000  | 2.278456000  | 1.131670000  |
| C  | 3.278046000  | -2.278456000 | -1.131670000 |
| C  | 3.370803000  | 0.000000000  | 0.000000000  |
| C  | 3.743436000  | 4.737470000  | 2.355176000  |
| C  | 3.743436000  | -4.737470000 | -2.355176000 |
| C  | 4.517151000  | 2.511158000  | 1.749936000  |
| C  | 4.517151000  | -2.511158000 | -1.749936000 |
| C  | 4.737470000  | 3.743436000  | 2.355176000  |
| C  | 4.737470000  | -3.743436000 | -2.355176000 |
| C  | 4.858951000  | 0.000000000  | 0.000000000  |
| C  | 5.568055000  | 0.850864000  | -0.856617000 |
| C  | 5.568055000  | -0.850864000 | 0.856617000  |
| C  | 6.962944000  | 0.849179000  | -0.860290000 |
| C  | 6.962944000  | -0.849179000 | 0.860290000  |
| C  | 7.664358000  | 0.000000000  | 0.000000000  |
| C  | -0.849179000 | 6.962944000  | 0.860290000  |
| C  | -0.849179000 | -6.962944000 | -0.860290000 |
| C  | -0.850864000 | 5.568055000  | 0.856617000  |
| C  | -0.850864000 | -5.568055000 | -0.856617000 |
| C  | -1.116231000 | 2.694199000  | -0.484814000 |
| C  | -1.116231000 | -2.694199000 | 0.484814000  |
| C  | -2.278456000 | 3.278046000  | -1.131670000 |



|   |              |              |              |
|---|--------------|--------------|--------------|
| C | -2.278456000 | -3.278046000 | 1.131670000  |
| C | -2.511158000 | 4.517151000  | -1.749936000 |
| C | -2.511158000 | -4.517151000 | 1.749936000  |
| C | -2.694199000 | 1.116231000  | -0.484814000 |
| C | -2.694199000 | -1.116231000 | 0.484814000  |
| C | -3.278046000 | 2.278456000  | -1.131670000 |
| C | -3.278046000 | -2.278456000 | 1.131670000  |
| C | -3.370803000 | 0.000000000  | 0.000000000  |
| C | -3.743436000 | 4.737470000  | -2.355176000 |
| C | -3.743436000 | -4.737470000 | 2.355176000  |
| C | -4.517151000 | 2.511158000  | -1.749936000 |
| C | -4.517151000 | -2.511158000 | 1.749936000  |
| C | -4.737470000 | 3.743436000  | -2.355176000 |
| C | -4.737470000 | -3.743436000 | 2.355176000  |
| C | -4.858951000 | 0.000000000  | 0.000000000  |
| C | -5.568055000 | 0.850864000  | 0.856617000  |
| C | -5.568055000 | -0.850864000 | -0.856617000 |
| C | -6.962944000 | 0.849179000  | 0.860290000  |
| C | -6.962944000 | -0.849179000 | -0.860290000 |
| C | -7.664358000 | 0.000000000  | 0.000000000  |
| H | 0.000000000  | 8.753881000  | 0.000000000  |
| H | 0.000000000  | -8.753881000 | 0.000000000  |
| H | 1.513415000  | 7.502898000  | -1.533580000 |
| H | 1.513415000  | -7.502898000 | 1.533580000  |
| H | 1.515577000  | 5.013452000  | -1.517581000 |
| H | 1.515577000  | -5.013452000 | 1.517581000  |
| H | 1.745716000  | 5.287775000  | 1.779762000  |
| H | 1.745716000  | -5.287775000 | -1.779762000 |
| H | 3.933385000  | 5.689461000  | 2.848751000  |
| H | 3.933385000  | -5.689461000 | -2.848751000 |
| H | 5.013452000  | 1.515577000  | -1.517581000 |
| H | 5.013452000  | -1.515577000 | 1.517581000  |
| H | 5.287775000  | 1.745716000  | 1.779762000  |
| H | 5.287775000  | -1.745716000 | -1.779762000 |
| H | 5.689461000  | 3.933385000  | 2.848751000  |
| H | 5.689461000  | -3.933385000 | -2.848751000 |
| H | 7.502898000  | 1.513415000  | -1.533580000 |
| H | 7.502898000  | -1.513415000 | 1.533580000  |
| H | 8.753881000  | 0.000000000  | 0.000000000  |
| H | -1.513415000 | 7.502898000  | 1.533580000  |
| H | -1.513415000 | -7.502898000 | -1.533580000 |
| H | -1.515577000 | 5.013452000  | 1.517581000  |
| H | -1.515577000 | -5.013452000 | -1.517581000 |
| H | -1.745716000 | 5.287775000  | -1.779762000 |
| H | -1.745716000 | -5.287775000 | 1.779762000  |
| H | -3.933385000 | 5.689461000  | -2.848751000 |
| H | -3.933385000 | -5.689461000 | 2.848751000  |
| H | -5.013452000 | 1.515577000  | 1.517581000  |
| H | -5.013452000 | -1.515577000 | -1.517581000 |
| H | -5.287775000 | 1.745716000  | -1.779762000 |
| H | -5.287775000 | -1.745716000 | 1.779762000  |

|   |              |              |              |
|---|--------------|--------------|--------------|
| H | -5.689461000 | 3.933385000  | -2.848751000 |
| H | -5.689461000 | -3.933385000 | 2.848751000  |
| H | -7.502898000 | 1.513415000  | 1.533580000  |
| H | -7.502898000 | -1.513415000 | -1.533580000 |
| H | -8.753881000 | 0.000000000  | 0.000000000  |
| N | 1.352837000  | 1.352837000  | 0.235308000  |
| N | 1.352837000  | -1.352837000 | -0.235308000 |
| N | -1.352837000 | 1.352837000  | -0.235308000 |
| N | -1.352837000 | -1.352837000 | 0.235308000  |

**64. Ni[Ph<sub>4</sub>Bz<sub>8</sub>]; S = 0 (ruffled)**

|    |             |              |              |
|----|-------------|--------------|--------------|
| Ni | 0.000000000 | 0.000000000  | 0.000288000  |
| C  | 0.000000000 | 3.157193000  | -0.945346000 |
| C  | 0.000000000 | 4.508158000  | -1.573001000 |
| C  | 0.000000000 | 4.639245000  | -2.964100000 |
| C  | 0.000000000 | 5.660952000  | -0.776529000 |
| C  | 0.000000000 | 5.905591000  | -3.554997000 |
| C  | 0.000000000 | 6.924975000  | -1.362719000 |
| C  | 0.000000000 | 7.050603000  | -2.755310000 |
| C  | 0.000000000 | -3.157193000 | -0.945346000 |
| C  | 0.000000000 | -4.508158000 | -1.573001000 |
| C  | 0.000000000 | -4.639245000 | -2.964100000 |
| C  | 0.000000000 | -5.660952000 | -0.776529000 |
| C  | 0.000000000 | -5.905591000 | -3.554997000 |
| C  | 0.000000000 | -6.924975000 | -1.362719000 |
| C  | 0.000000000 | -7.050603000 | -2.755310000 |
| C  | 1.218218000 | 2.590263000  | -0.561958000 |
| C  | 1.218218000 | -2.590263000 | -0.561958000 |
| C  | 2.485796000 | 3.294687000  | -0.418831000 |
| C  | 2.485796000 | -3.294687000 | -0.418831000 |
| C  | 2.590273000 | 1.218190000  | 0.562597000  |
| C  | 2.590273000 | -1.218190000 | 0.562597000  |
| C  | 2.973630000 | 4.522577000  | -0.895264000 |
| C  | 2.973630000 | -4.522577000 | -0.895264000 |
| C  | 3.157259000 | 0.000000000  | 0.945904000  |
| C  | 3.294878000 | 2.485599000  | 0.419099000  |
| C  | 3.294878000 | -2.485599000 | 0.419099000  |
| C  | 4.217111000 | 4.967639000  | -0.458645000 |
| C  | 4.217111000 | -4.967639000 | -0.458645000 |
| C  | 4.508468000 | 0.000000000  | 1.573035000  |
| C  | 4.523107000 | 2.973108000  | 0.895006000  |
| C  | 4.523107000 | -2.973108000 | 0.895006000  |
| C  | 4.639768000 | 0.000000000  | 2.964109000  |
| C  | 4.968403000 | 4.216374000  | 0.458029000  |
| C  | 4.968403000 | -4.216374000 | 0.458029000  |
| C  | 5.661159000 | 0.000000000  | 0.776412000  |
| C  | 5.906185000 | 0.000000000  | 3.554836000  |
| C  | 6.925260000 | 0.000000000  | 1.362435000  |
| C  | 7.051091000 | 0.000000000  | 2.755007000  |

|   |              |              |              |
|---|--------------|--------------|--------------|
| C | -1.218218000 | 2.590263000  | -0.561958000 |
| C | -1.218218000 | -2.590263000 | -0.561958000 |
| C | -2.485796000 | 3.294687000  | -0.418831000 |
| C | -2.485796000 | -3.294687000 | -0.418831000 |
| C | -2.590273000 | 1.218190000  | 0.562597000  |
| C | -2.590273000 | -1.218190000 | 0.562597000  |
| C | -2.973630000 | 4.522577000  | -0.895264000 |
| C | -2.973630000 | -4.522577000 | -0.895264000 |
| C | -3.157259000 | 0.000000000  | 0.945904000  |
| C | -3.294878000 | 2.485599000  | 0.419099000  |
| C | -3.294878000 | -2.485599000 | 0.419099000  |
| C | -4.217111000 | 4.967639000  | -0.458645000 |
| C | -4.217111000 | -4.967639000 | -0.458645000 |
| C | -4.508468000 | 0.000000000  | 1.573035000  |
| C | -4.523107000 | 2.973108000  | 0.895006000  |
| C | -4.523107000 | -2.973108000 | 0.895006000  |
| C | -4.639768000 | 0.000000000  | 2.964109000  |
| C | -4.968403000 | 4.216374000  | 0.458029000  |
| C | -4.968403000 | -4.216374000 | 0.458029000  |
| C | -5.661159000 | 0.000000000  | 0.776412000  |
| C | -5.906185000 | 0.000000000  | 3.554836000  |
| C | -6.925260000 | 0.000000000  | 1.362435000  |
| C | -7.051091000 | 0.000000000  | 2.755007000  |
| H | 0.000000000  | 3.741392000  | -3.580805000 |
| H | 0.000000000  | 5.551676000  | 0.306705000  |
| H | 0.000000000  | 5.996329000  | -4.640266000 |
| H | 0.000000000  | 7.813192000  | -0.732735000 |
| H | 0.000000000  | 8.038135000  | -3.215548000 |
| H | 0.000000000  | -3.741392000 | -3.580805000 |
| H | 0.000000000  | -5.551676000 | 0.306705000  |
| H | 0.000000000  | -5.996329000 | -4.640266000 |
| H | 0.000000000  | -7.813192000 | -0.732735000 |
| H | 0.000000000  | -8.038135000 | -3.215548000 |
| H | 2.409048000  | 5.120897000  | -1.603008000 |
| H | 2.409048000  | -5.120897000 | -1.603008000 |
| H | 3.741998000  | 0.000000000  | 3.580940000  |
| H | 4.603086000  | 5.917100000  | -0.826900000 |
| H | 4.603086000  | -5.917100000 | -0.826900000 |
| H | 5.121432000  | 2.408502000  | 1.602721000  |
| H | 5.121432000  | -2.408502000 | 1.602721000  |
| H | 5.551769000  | 0.000000000  | -0.306811000 |
| H | 5.918081000  | 4.602163000  | 0.825953000  |
| H | 5.918081000  | -4.602163000 | 0.825953000  |
| H | 5.997038000  | 0.000000000  | 4.640078000  |
| H | 7.813373000  | 0.000000000  | 0.732332000  |
| H | 8.038693000  | 0.000000000  | 3.215139000  |
| H | -2.409048000 | 5.120897000  | -1.603008000 |
| H | -2.409048000 | -5.120897000 | -1.603008000 |
| H | -3.741998000 | 0.000000000  | 3.580940000  |
| H | -4.603086000 | 5.917100000  | -0.826900000 |
| H | -4.603086000 | -5.917100000 | -0.826900000 |

|   |              |              |              |
|---|--------------|--------------|--------------|
| H | -5.121432000 | 2.408502000  | 1.602721000  |
| H | -5.121432000 | -2.408502000 | 1.602721000  |
| H | -5.551769000 | 0.000000000  | -0.306811000 |
| H | -5.918081000 | 4.602163000  | 0.825953000  |
| H | -5.918081000 | -4.602163000 | 0.825953000  |
| H | -5.997038000 | 0.000000000  | 4.640078000  |
| H | -7.813373000 | 0.000000000  | 0.732332000  |
| H | -8.038693000 | 0.000000000  | 3.215139000  |
| N | 1.335707000  | 1.335717000  | 0.000348000  |
| N | 1.335707000  | -1.335717000 | 0.000348000  |
| N | -1.335707000 | 1.335717000  | 0.000348000  |
| N | -1.335707000 | -1.335717000 | 0.000348000  |

**65. Pd[Ph<sub>4</sub>Bz<sub>8</sub>]; S = 0 (saddled)**

|    |              |              |              |
|----|--------------|--------------|--------------|
| Pd | 0.000000000  | 0.000000000  | 0.000000000  |
| C  | 0.000000000  | 3.415323000  | 0.000000000  |
| C  | 0.000000000  | 4.904955000  | 0.000000000  |
| C  | 0.000000000  | 7.709213000  | 0.000000000  |
| C  | 0.000000000  | -3.415323000 | 0.000000000  |
| C  | 0.000000000  | -4.904955000 | 0.000000000  |
| C  | 0.000000000  | -7.709213000 | 0.000000000  |
| C  | 0.754562000  | 7.007981000  | -0.944578000 |
| C  | 0.754562000  | -7.007981000 | 0.944578000  |
| C  | 0.756676000  | 5.613214000  | -0.940905000 |
| C  | 0.756676000  | -5.613214000 | 0.940905000  |
| C  | 1.175946000  | 2.764722000  | 0.384637000  |
| C  | 1.175946000  | -2.764722000 | -0.384637000 |
| C  | 2.372262000  | 3.373725000  | 0.953536000  |
| C  | 2.372262000  | -3.373725000 | -0.953536000 |
| C  | 2.629972000  | 4.632140000  | 1.521923000  |
| C  | 2.629972000  | -4.632140000 | -1.521923000 |
| C  | 2.764722000  | 1.175946000  | 0.384637000  |
| C  | 2.764722000  | -1.175946000 | -0.384637000 |
| C  | 3.373725000  | 2.372262000  | 0.953536000  |
| C  | 3.373725000  | -2.372262000 | -0.953536000 |
| C  | 3.415323000  | 0.000000000  | 0.000000000  |
| C  | 3.882877000  | 4.875572000  | 2.073686000  |
| C  | 3.882877000  | -4.875572000 | -2.073686000 |
| C  | 4.632140000  | 2.629972000  | 1.521923000  |
| C  | 4.632140000  | -2.629972000 | -1.521923000 |
| C  | 4.875572000  | 3.882877000  | 2.073686000  |
| C  | 4.875572000  | -3.882877000 | -2.073686000 |
| C  | 4.904955000  | 0.000000000  | 0.000000000  |
| C  | 5.613214000  | 0.756676000  | -0.940905000 |
| C  | 5.613214000  | -0.756676000 | 0.940905000  |
| C  | 7.007981000  | 0.754562000  | -0.944578000 |
| C  | 7.007981000  | -0.754562000 | 0.944578000  |
| C  | 7.709213000  | 0.000000000  | 0.000000000  |
| C  | -0.754562000 | 7.007981000  | 0.944578000  |

|   |              |              |              |
|---|--------------|--------------|--------------|
| C | -0.754562000 | -7.007981000 | -0.944578000 |
| C | -0.756676000 | 5.613214000  | 0.940905000  |
| C | -0.756676000 | -5.613214000 | -0.940905000 |
| C | -1.175946000 | 2.764722000  | -0.384637000 |
| C | -1.175946000 | -2.764722000 | 0.384637000  |
| C | -2.372262000 | 3.373725000  | -0.953536000 |
| C | -2.372262000 | -3.373725000 | 0.953536000  |
| C | -2.629972000 | 4.632140000  | -1.521923000 |
| C | -2.629972000 | -4.632140000 | 1.521923000  |
| C | -2.764722000 | 1.175946000  | -0.384637000 |
| C | -2.764722000 | -1.175946000 | 0.384637000  |
| C | -3.373725000 | 2.372262000  | -0.953536000 |
| C | -3.373725000 | -2.372262000 | 0.953536000  |
| C | -3.415323000 | 0.000000000  | 0.000000000  |
| C | -3.882877000 | 4.875572000  | -2.073686000 |
| C | -3.882877000 | -4.875572000 | 2.073686000  |
| C | -4.632140000 | 2.629972000  | -1.521923000 |
| C | -4.632140000 | -2.629972000 | 1.521923000  |
| C | -4.875572000 | 3.882877000  | -2.073686000 |
| C | -4.875572000 | -3.882877000 | 2.073686000  |
| C | -4.904955000 | 0.000000000  | 0.000000000  |
| C | -5.613214000 | 0.756676000  | 0.940905000  |
| C | -5.613214000 | -0.756676000 | -0.940905000 |
| C | -7.007981000 | 0.754562000  | 0.944578000  |
| C | -7.007981000 | -0.754562000 | -0.944578000 |
| C | -7.709213000 | 0.000000000  | 0.000000000  |
| H | 0.000000000  | 8.798717000  | 0.000000000  |
| H | 0.000000000  | -8.798717000 | 0.000000000  |
| H | 1.344431000  | 7.548028000  | -1.683753000 |
| H | 1.344431000  | -7.548028000 | 1.683753000  |
| H | 1.348400000  | 5.058149000  | -1.667383000 |
| H | 1.348400000  | -5.058149000 | 1.667383000  |
| H | 1.868203000  | 5.405223000  | 1.557904000  |
| H | 1.868203000  | -5.405223000 | -1.557904000 |
| H | 4.087769000  | 5.845312000  | 2.525005000  |
| H | 4.087769000  | -5.845312000 | -2.525005000 |
| H | 5.058149000  | 1.348400000  | -1.667383000 |
| H | 5.058149000  | -1.348400000 | 1.667383000  |
| H | 5.405223000  | 1.868203000  | 1.557904000  |
| H | 5.405223000  | -1.868203000 | -1.557904000 |
| H | 5.845312000  | 4.087769000  | 2.525005000  |
| H | 5.845312000  | -4.087769000 | -2.525005000 |
| H | 7.548028000  | 1.344431000  | -1.683753000 |
| H | 7.548028000  | -1.344431000 | 1.683753000  |
| H | 8.798717000  | 0.000000000  | 0.000000000  |
| H | -1.344431000 | 7.548028000  | 1.683753000  |
| H | -1.344431000 | -7.548028000 | -1.683753000 |
| H | -1.348400000 | 5.058149000  | 1.667383000  |
| H | -1.348400000 | -5.058149000 | -1.667383000 |
| H | -1.868203000 | 5.405223000  | -1.557904000 |
| H | -1.868203000 | -5.405223000 | 1.557904000  |

|   |              |              |              |
|---|--------------|--------------|--------------|
| H | -4.087769000 | 5.845312000  | -2.525005000 |
| H | -4.087769000 | -5.845312000 | 2.525005000  |
| H | -5.058149000 | 1.348400000  | 1.667383000  |
| H | -5.058149000 | -1.348400000 | -1.667383000 |
| H | -5.405223000 | 1.868203000  | -1.557904000 |
| H | -5.405223000 | -1.868203000 | 1.557904000  |
| H | -5.845312000 | 4.087769000  | -2.525005000 |
| H | -5.845312000 | -4.087769000 | 2.525005000  |
| H | -7.548028000 | 1.344431000  | 1.683753000  |
| H | -7.548028000 | -1.344431000 | -1.683753000 |
| H | -8.798717000 | 0.000000000  | 0.000000000  |
| N | 1.426738000  | 1.426738000  | 0.154872000  |
| N | 1.426738000  | -1.426738000 | -0.154872000 |
| N | -1.426738000 | 1.426738000  | -0.154872000 |
| N | -1.426738000 | -1.426738000 | 0.154872000  |

**66. Pd[Ph<sub>4</sub>Bz<sub>8</sub>]; S = 0 (ruffled)**

|    |             |              |              |
|----|-------------|--------------|--------------|
| Pd | 0.000000000 | 0.000000000  | 0.000911000  |
| C  | 0.000000000 | 3.321156000  | -0.664300000 |
| C  | 0.000000000 | 4.741916000  | -1.118012000 |
| C  | 0.000000000 | 5.045206000  | -2.481791000 |
| C  | 0.000000000 | 5.783830000  | -0.182766000 |
| C  | 0.000000000 | 6.375096000  | -2.908979000 |
| C  | 0.000000000 | 7.111641000  | -0.605598000 |
| C  | 0.000000000 | 7.410716000  | -1.971365000 |
| C  | 0.000000000 | -3.321156000 | -0.664300000 |
| C  | 0.000000000 | -4.741916000 | -1.118012000 |
| C  | 0.000000000 | -5.045206000 | -2.481791000 |
| C  | 0.000000000 | -5.783830000 | -0.182766000 |
| C  | 0.000000000 | -6.375096000 | -2.908979000 |
| C  | 0.000000000 | -7.111641000 | -0.605598000 |
| C  | 0.000000000 | -7.410716000 | -1.971365000 |
| C  | 1.243577000 | 2.733417000  | -0.399329000 |
| C  | 1.243577000 | -2.733417000 | -0.399329000 |
| C  | 2.526565000 | 3.429407000  | -0.308831000 |
| C  | 2.526565000 | -3.429407000 | -0.308831000 |
| C  | 2.733535000 | 1.243571000  | 0.400592000  |
| C  | 2.733535000 | -1.243571000 | 0.400592000  |
| C  | 2.964075000 | 4.712936000  | -0.679786000 |
| C  | 2.964075000 | -4.712936000 | -0.679786000 |
| C  | 3.321383000 | 0.000000000  | 0.665356000  |
| C  | 3.429526000 | 2.526539000  | 0.309770000  |
| C  | 3.429526000 | -2.526539000 | 0.309770000  |
| C  | 4.255549000 | 5.111007000  | -0.353191000 |
| C  | 4.255549000 | -5.111007000 | -0.353191000 |
| C  | 4.713144000 | 2.964085000  | 0.680383000  |
| C  | 4.713144000 | -2.964085000 | 0.680383000  |
| C  | 4.742614000 | 0.000000000  | 1.117583000  |
| C  | 5.047418000 | 0.000000000  | 2.481017000  |

|   |              |              |              |
|---|--------------|--------------|--------------|
| C | 5.111156000  | 4.255515000  | 0.353528000  |
| C | 5.111156000  | -4.255515000 | 0.353528000  |
| C | 5.783496000  | 0.000000000  | 0.181176000  |
| C | 6.377798000  | 0.000000000  | 2.906696000  |
| C | 7.111777000  | 0.000000000  | 0.602502000  |
| C | 7.412367000  | 0.000000000  | 1.967928000  |
| C | -1.243577000 | 2.733417000  | -0.399329000 |
| C | -1.243577000 | -2.733417000 | -0.399329000 |
| C | -2.526565000 | 3.429407000  | -0.308831000 |
| C | -2.526565000 | -3.429407000 | -0.308831000 |
| C | -2.733535000 | 1.243571000  | 0.400592000  |
| C | -2.733535000 | -1.243571000 | 0.400592000  |
| C | -2.964075000 | 4.712936000  | -0.679786000 |
| C | -2.964075000 | -4.712936000 | -0.679786000 |
| C | -3.321383000 | 0.000000000  | 0.665356000  |
| C | -3.429526000 | 2.526539000  | 0.309770000  |
| C | -3.429526000 | -2.526539000 | 0.309770000  |
| C | -4.255549000 | 5.111007000  | -0.353191000 |
| C | -4.255549000 | -5.111007000 | -0.353191000 |
| C | -4.713144000 | 2.964085000  | 0.680383000  |
| C | -4.713144000 | -2.964085000 | 0.680383000  |
| C | -4.742614000 | 0.000000000  | 1.117583000  |
| C | -5.047418000 | 0.000000000  | 2.481017000  |
| C | -5.111156000 | 4.255515000  | 0.353528000  |
| C | -5.111156000 | -4.255515000 | 0.353528000  |
| C | -5.783496000 | 0.000000000  | 0.181176000  |
| C | -6.377798000 | 0.000000000  | 2.906696000  |
| C | -7.111777000 | 0.000000000  | 0.602502000  |
| C | -7.412367000 | 0.000000000  | 1.967928000  |
| H | 0.000000000  | 4.231191000  | -3.205323000 |
| H | 0.000000000  | 5.539023000  | 0.878048000  |
| H | 0.000000000  | 6.601555000  | -3.974155000 |
| H | 0.000000000  | 7.914006000  | 0.130482000  |
| H | 0.000000000  | 8.448196000  | -2.303940000 |
| H | 0.000000000  | -4.231191000 | -3.205323000 |
| H | 0.000000000  | -5.539023000 | 0.878048000  |
| H | 0.000000000  | -6.601555000 | -3.974155000 |
| H | 0.000000000  | -7.914006000 | 0.130482000  |
| H | 0.000000000  | -8.448196000 | -2.303940000 |
| H | 2.325608000  | 5.397514000  | -1.226276000 |
| H | 2.325608000  | -5.397514000 | -1.226276000 |
| H | 4.234221000  | 0.000000000  | 3.205472000  |
| H | 4.595927000  | 6.104081000  | -0.643108000 |
| H | 4.595927000  | -6.104081000 | -0.643108000 |
| H | 5.397797000  | 2.325711000  | 1.226890000  |
| H | 5.397797000  | -2.325711000 | 1.226890000  |
| H | 5.537493000  | 0.000000000  | -0.879360000 |
| H | 6.104306000  | 4.595924000  | 0.643166000  |
| H | 6.104306000  | -4.595924000 | 0.643166000  |
| H | 6.605471000  | 0.000000000  | 3.971610000  |
| H | 7.913297000  | 0.000000000  | -0.134497000 |

|   |              |              |              |
|---|--------------|--------------|--------------|
| H | 8.450200000  | 0.000000000  | 2.299364000  |
| H | -2.325608000 | 5.397514000  | -1.226276000 |
| H | -2.325608000 | -5.397514000 | -1.226276000 |
| H | -4.234221000 | 0.000000000  | 3.205472000  |
| H | -4.595927000 | 6.104081000  | -0.643108000 |
| H | -4.595927000 | -6.104081000 | -0.643108000 |
| H | -5.397797000 | 2.325711000  | 1.226890000  |
| H | -5.397797000 | -2.325711000 | 1.226890000  |
| H | -5.537493000 | 0.000000000  | -0.879360000 |
| H | -6.104306000 | 4.595924000  | 0.643166000  |
| H | -6.104306000 | -4.595924000 | 0.643166000  |
| H | -6.605471000 | 0.000000000  | 3.971610000  |
| H | -7.913297000 | 0.000000000  | -0.134497000 |
| H | -8.450200000 | 0.000000000  | 2.299364000  |
| N | 1.426713000  | 1.426692000  | 0.000789000  |
| N | 1.426713000  | -1.426692000 | 0.000789000  |
| N | -1.426713000 | 1.426692000  | 0.000789000  |
| N | -1.426713000 | -1.426692000 | 0.000789000  |

**67. Pt[Ph<sub>4</sub>Bz<sub>8</sub>]; S = 0 (saddled)**

|    |             |              |              |
|----|-------------|--------------|--------------|
| Pt | 0.000000000 | 0.000000000  | 0.000000000  |
| C  | 0.000000000 | 3.417675000  | 0.000000000  |
| C  | 0.000000000 | 4.907931000  | 0.000000000  |
| C  | 0.000000000 | 7.711763000  | 0.000000000  |
| C  | 0.000000000 | -3.417675000 | 0.000000000  |
| C  | 0.000000000 | -4.907931000 | 0.000000000  |
| C  | 0.000000000 | -7.711763000 | 0.000000000  |
| C  | 0.731812000 | 7.010593000  | -0.962357000 |
| C  | 0.731812000 | -7.010593000 | 0.962357000  |
| C  | 0.733877000 | 5.615774000  | -0.958887000 |
| C  | 0.733877000 | -5.615774000 | 0.958887000  |
| C  | 1.178689000 | 2.769678000  | 0.378681000  |
| C  | 1.178689000 | -2.769678000 | -0.378681000 |
| C  | 2.380627000 | 3.381650000  | 0.926967000  |
| C  | 2.380627000 | -3.381650000 | -0.926967000 |
| C  | 2.645870000 | 4.646855000  | 1.476903000  |
| C  | 2.645870000 | -4.646855000 | -1.476903000 |
| C  | 2.769678000 | 1.178689000  | 0.378681000  |
| C  | 2.769678000 | -1.178689000 | -0.378681000 |
| C  | 3.381650000 | 2.380627000  | 0.926967000  |
| C  | 3.381650000 | -2.380627000 | -0.926967000 |
| C  | 3.417675000 | 0.000000000  | 0.000000000  |
| C  | 3.905006000 | 4.897526000  | 2.010259000  |
| C  | 3.905006000 | -4.897526000 | -2.010259000 |
| C  | 4.646855000 | 2.645870000  | 1.476903000  |
| C  | 4.646855000 | -2.645870000 | -1.476903000 |
| C  | 4.897526000 | 3.905006000  | 2.010259000  |
| C  | 4.897526000 | -3.905006000 | -2.010259000 |
| C  | 4.907931000 | 0.000000000  | 0.000000000  |



|   |              |              |              |
|---|--------------|--------------|--------------|
| C | 5.615774000  | 0.733877000  | -0.958887000 |
| C | 5.615774000  | -0.733877000 | 0.958887000  |
| C | 7.010593000  | 0.731812000  | -0.962357000 |
| C | 7.010593000  | -0.731812000 | 0.962357000  |
| C | 7.711763000  | 0.000000000  | 0.000000000  |
| C | -0.731812000 | 7.010593000  | 0.962357000  |
| C | -0.731812000 | -7.010593000 | -0.962357000 |
| C | -0.733877000 | 5.615774000  | 0.958887000  |
| C | -0.733877000 | -5.615774000 | -0.958887000 |
| C | -1.178689000 | 2.769678000  | -0.378681000 |
| C | -1.178689000 | -2.769678000 | 0.378681000  |
| C | -2.380627000 | 3.381650000  | -0.926967000 |
| C | -2.380627000 | -3.381650000 | 0.926967000  |
| C | -2.645870000 | 4.646855000  | -1.476903000 |
| C | -2.645870000 | -4.646855000 | 1.476903000  |
| C | -2.769678000 | 1.178689000  | -0.378681000 |
| C | -2.769678000 | -1.178689000 | 0.378681000  |
| C | -3.381650000 | 2.380627000  | -0.926967000 |
| C | -3.381650000 | -2.380627000 | 0.926967000  |
| C | -3.417675000 | 0.000000000  | 0.000000000  |
| C | -3.905006000 | 4.897526000  | -2.010259000 |
| C | -3.905006000 | -4.897526000 | 2.010259000  |
| C | -4.646855000 | 2.645870000  | -1.476903000 |
| C | -4.646855000 | -2.645870000 | 1.476903000  |
| C | -4.897526000 | 3.905006000  | -2.010259000 |
| C | -4.897526000 | -3.905006000 | 2.010259000  |
| C | -4.907931000 | 0.000000000  | 0.000000000  |
| C | -5.615774000 | 0.733877000  | 0.958887000  |
| C | -5.615774000 | -0.733877000 | -0.958887000 |
| C | -7.010593000 | 0.731812000  | 0.962357000  |
| C | -7.010593000 | -0.731812000 | -0.962357000 |
| C | -7.711763000 | 0.000000000  | 0.000000000  |
| H | 0.000000000  | 8.801258000  | 0.000000000  |
| H | 0.000000000  | -8.801258000 | 0.000000000  |
| H | 1.303982000  | 7.550692000  | -1.715273000 |
| H | 1.303982000  | -7.550692000 | 1.715273000  |
| H | 1.307715000  | 5.060729000  | -1.699644000 |
| H | 1.307715000  | -5.060729000 | 1.699644000  |
| H | 1.884680000  | 5.420055000  | 1.513705000  |
| H | 1.884680000  | -5.420055000 | -1.513705000 |
| H | 4.114738000  | 5.872646000  | 2.447500000  |
| H | 4.114738000  | -5.872646000 | -2.447500000 |
| H | 5.060729000  | 1.307715000  | -1.699644000 |
| H | 5.060729000  | -1.307715000 | 1.699644000  |
| H | 5.420055000  | 1.884680000  | 1.513705000  |
| H | 5.420055000  | -1.884680000 | -1.513705000 |
| H | 5.872646000  | 4.114738000  | 2.447500000  |
| H | 5.872646000  | -4.114738000 | -2.447500000 |
| H | 7.550692000  | 1.303982000  | -1.715273000 |
| H | 7.550692000  | -1.303982000 | 1.715273000  |
| H | 8.801258000  | 0.000000000  | 0.000000000  |

|   |              |              |              |
|---|--------------|--------------|--------------|
| H | -1.303982000 | 7.550692000  | 1.715273000  |
| H | -1.303982000 | -7.550692000 | -1.715273000 |
| H | -1.307715000 | 5.060729000  | 1.699644000  |
| H | -1.307715000 | -5.060729000 | -1.699644000 |
| H | -1.884680000 | 5.420055000  | -1.513705000 |
| H | -1.884680000 | -5.420055000 | 1.513705000  |
| H | -4.114738000 | 5.872646000  | -2.447500000 |
| H | -4.114738000 | -5.872646000 | 2.447500000  |
| H | -5.060729000 | 1.307715000  | 1.699644000  |
| H | -5.060729000 | -1.307715000 | -1.699644000 |
| H | -5.420055000 | 1.884680000  | -1.513705000 |
| H | -5.420055000 | -1.884680000 | 1.513705000  |
| H | -5.872646000 | 4.114738000  | -2.447500000 |
| H | -5.872646000 | -4.114738000 | 2.447500000  |
| H | -7.550692000 | 1.303982000  | 1.715273000  |
| H | -7.550692000 | -1.303982000 | -1.715273000 |
| H | -8.801258000 | 0.000000000  | 0.000000000  |
| N | 1.424679000  | 1.424679000  | 0.165749000  |
| N | 1.424679000  | -1.424679000 | -0.165749000 |
| N | -1.424679000 | 1.424679000  | -0.165749000 |
| N | -1.424679000 | -1.424679000 | 0.165749000  |

**68. Pt[Ph<sub>4</sub>Bz<sub>8</sub>]; S = 0 (ruffled)**

|    |             |              |              |
|----|-------------|--------------|--------------|
| Pt | 0.000000000 | 0.000000000  | -0.000179000 |
| C  | 0.000000000 | 3.327637000  | -0.653737000 |
| C  | 0.000000000 | 4.750820000  | -1.100428000 |
| C  | 0.000000000 | 5.060477000  | -2.462823000 |
| C  | 0.000000000 | 5.788037000  | -0.159947000 |
| C  | 0.000000000 | 6.392455000  | -2.883447000 |
| C  | 0.000000000 | 7.117867000  | -0.576418000 |
| C  | 0.000000000 | 7.423472000  | -1.940749000 |
| C  | 0.000000000 | -3.327637000 | -0.653737000 |
| C  | 0.000000000 | -4.750820000 | -1.100428000 |
| C  | 0.000000000 | -5.060477000 | -2.462823000 |
| C  | 0.000000000 | -5.788037000 | -0.159947000 |
| C  | 0.000000000 | -6.392455000 | -2.883447000 |
| C  | 0.000000000 | -7.117867000 | -0.576418000 |
| C  | 0.000000000 | -7.423472000 | -1.940749000 |
| C  | 1.243710000 | 2.739143000  | -0.393126000 |
| C  | 1.243710000 | -2.739143000 | -0.393126000 |
| C  | 2.525663000 | 3.431805000  | -0.303862000 |
| C  | 2.525663000 | -3.431805000 | -0.303862000 |
| C  | 2.739194000 | 1.243688000  | 0.392706000  |
| C  | 2.739194000 | -1.243688000 | 0.392706000  |
| C  | 2.961492000 | 4.717382000  | -0.669905000 |
| C  | 2.961492000 | -4.717382000 | -0.669905000 |
| C  | 3.327684000 | 0.000000000  | 0.653400000  |
| C  | 3.431877000 | 2.525612000  | 0.303360000  |
| C  | 3.431877000 | -2.525612000 | 0.303360000  |

|   |              |              |              |
|---|--------------|--------------|--------------|
| C | 4.254646000  | 5.113905000  | -0.348954000 |
| C | 4.254646000  | -5.113905000 | -0.348954000 |
| C | 4.717565000  | 2.961377000  | 0.669119000  |
| C | 4.717565000  | -2.961377000 | 0.669119000  |
| C | 4.750663000  | 0.000000000  | 1.100725000  |
| C | 5.059377000  | 0.000000000  | 2.463360000  |
| C | 5.114198000  | 4.254406000  | 0.347831000  |
| C | 5.114198000  | -4.254406000 | 0.347831000  |
| C | 5.788549000  | 0.000000000  | 0.160973000  |
| C | 6.391037000  | 0.000000000  | 2.884950000  |
| C | 7.118091000  | 0.000000000  | 0.578431000  |
| C | 7.422715000  | 0.000000000  | 1.942979000  |
| C | -1.243710000 | 2.739143000  | -0.393126000 |
| C | -1.243710000 | -2.739143000 | -0.393126000 |
| C | -2.525663000 | 3.431805000  | -0.303862000 |
| C | -2.525663000 | -3.431805000 | -0.303862000 |
| C | -2.739194000 | 1.243688000  | 0.392706000  |
| C | -2.739194000 | -1.243688000 | 0.392706000  |
| C | -2.961492000 | 4.717382000  | -0.669905000 |
| C | -2.961492000 | -4.717382000 | -0.669905000 |
| C | -3.327684000 | 0.000000000  | 0.653400000  |
| C | -3.431877000 | 2.525612000  | 0.303360000  |
| C | -3.431877000 | -2.525612000 | 0.303360000  |
| C | -4.254646000 | 5.113905000  | -0.348954000 |
| C | -4.254646000 | -5.113905000 | -0.348954000 |
| C | -4.717565000 | 2.961377000  | 0.669119000  |
| C | -4.717565000 | -2.961377000 | 0.669119000  |
| C | -4.750663000 | 0.000000000  | 1.100725000  |
| C | -5.059377000 | 0.000000000  | 2.463360000  |
| C | -5.114198000 | 4.254406000  | 0.347831000  |
| C | -5.114198000 | -4.254406000 | 0.347831000  |
| C | -5.788549000 | 0.000000000  | 0.160973000  |
| C | -6.391037000 | 0.000000000  | 2.884950000  |
| C | -7.118091000 | 0.000000000  | 0.578431000  |
| C | -7.422715000 | 0.000000000  | 1.942979000  |
| H | 0.000000000  | 4.249803000  | -3.190117000 |
| H | 0.000000000  | 5.537772000  | 0.899594000  |
| H | 0.000000000  | 6.624223000  | -3.947458000 |
| H | 0.000000000  | 7.916786000  | 0.163406000  |
| H | 0.000000000  | 8.462560000  | -2.268290000 |
| H | 0.000000000  | -4.249803000 | -3.190117000 |
| H | 0.000000000  | -5.537772000 | 0.899594000  |
| H | 0.000000000  | -6.624223000 | -3.947458000 |
| H | 0.000000000  | -7.916786000 | 0.163406000  |
| H | 0.000000000  | -8.462560000 | -2.268290000 |
| H | 2.319964000  | 5.404988000  | -1.208536000 |
| H | 2.319964000  | -5.404988000 | -1.208536000 |
| H | 4.248156000  | 0.000000000  | 3.190045000  |
| H | 4.593005000  | 6.108682000  | -0.635239000 |
| H | 4.593005000  | -6.108682000 | -0.635239000 |
| H | 5.405108000  | 2.319880000  | 1.207865000  |

|   |              |              |              |
|---|--------------|--------------|--------------|
| H | 5.405108000  | -2.319880000 | 1.207865000  |
| H | 5.539187000  | 0.000000000  | -0.898807000 |
| H | 6.109053000  | 4.592727000  | 0.633897000  |
| H | 6.109053000  | -4.592727000 | 0.633897000  |
| H | 6.622040000  | 0.000000000  | 3.949146000  |
| H | 7.917517000  | 0.000000000  | -0.160868000 |
| H | 8.461536000  | 0.000000000  | 2.271304000  |
| H | -2.319964000 | 5.404988000  | -1.208536000 |
| H | -2.319964000 | -5.404988000 | -1.208536000 |
| H | -4.248156000 | 0.000000000  | 3.190045000  |
| H | -4.593005000 | 6.108682000  | -0.635239000 |
| H | -4.593005000 | -6.108682000 | -0.635239000 |
| H | -5.405108000 | 2.319880000  | 1.207865000  |
| H | -5.405108000 | -2.319880000 | 1.207865000  |
| H | -5.539187000 | 0.000000000  | -0.898807000 |
| H | -6.109053000 | 4.592727000  | 0.633897000  |
| H | -6.109053000 | -4.592727000 | 0.633897000  |
| H | -6.622040000 | 0.000000000  | 3.949146000  |
| H | -7.917517000 | 0.000000000  | -0.160868000 |
| H | -8.461536000 | 0.000000000  | 2.271304000  |
| N | 1.427097000  | 1.427053000  | -0.000207000 |
| N | 1.427097000  | -1.427053000 | -0.000207000 |
| N | -1.427097000 | 1.427053000  | -0.000207000 |
| N | -1.427097000 | -1.427053000 | -0.000207000 |

**69. Zn[Ph<sub>4</sub>Bz<sub>8</sub>]; S = 0 (saddled)**

|    |             |              |              |
|----|-------------|--------------|--------------|
| Zn | 0.000000000 | 0.000000000  | 0.000000000  |
| C  | 0.000000000 | 3.422310000  | 0.000000000  |
| C  | 0.000000000 | 4.912946000  | 0.000000000  |
| C  | 0.000000000 | 7.718227000  | 0.000000000  |
| C  | 0.000000000 | -3.422310000 | 0.000000000  |
| C  | 0.000000000 | -4.912946000 | 0.000000000  |
| C  | 0.000000000 | -7.718227000 | 0.000000000  |
| C  | 0.709938000 | 7.016804000  | -0.978415000 |
| C  | 0.709938000 | -7.016804000 | 0.978415000  |
| C  | 0.711917000 | 5.621954000  | -0.974752000 |
| C  | 0.711917000 | -5.621954000 | 0.974752000  |
| C  | 1.195026000 | 2.780785000  | 0.367688000  |
| C  | 1.195026000 | -2.780785000 | -0.367688000 |
| C  | 2.404096000 | 3.407194000  | 0.894316000  |
| C  | 2.404096000 | -3.407194000 | -0.894316000 |
| C  | 2.678236000 | 4.679052000  | 1.425848000  |
| C  | 2.678236000 | -4.679052000 | -1.425848000 |
| C  | 2.780785000 | 1.195026000  | 0.367688000  |
| C  | 2.780785000 | -1.195026000 | -0.367688000 |
| C  | 3.407194000 | 2.404096000  | 0.894316000  |
| C  | 3.407194000 | -2.404096000 | -0.894316000 |
| C  | 3.422310000 | 0.000000000  | 0.000000000  |
| C  | 3.943103000 | 4.935879000  | 1.941578000  |

|   |              |              |              |
|---|--------------|--------------|--------------|
| C | 3.943103000  | -4.935879000 | -1.941578000 |
| C | 4.679052000  | 2.678236000  | 1.425848000  |
| C | 4.679052000  | -2.678236000 | -1.425848000 |
| C | 4.912946000  | 0.000000000  | 0.000000000  |
| C | 4.935879000  | 3.943103000  | 1.941578000  |
| C | 4.935879000  | -3.943103000 | -1.941578000 |
| C | 5.621954000  | 0.711917000  | -0.974752000 |
| C | 5.621954000  | -0.711917000 | 0.974752000  |
| C | 7.016804000  | 0.709938000  | -0.978415000 |
| C | 7.016804000  | -0.709938000 | 0.978415000  |
| C | 7.718227000  | 0.000000000  | 0.000000000  |
| C | -0.709938000 | 7.016804000  | 0.978415000  |
| C | -0.709938000 | -7.016804000 | -0.978415000 |
| C | -0.711917000 | 5.621954000  | 0.974752000  |
| C | -0.711917000 | -5.621954000 | -0.974752000 |
| C | -1.195026000 | 2.780785000  | -0.367688000 |
| C | -1.195026000 | -2.780785000 | 0.367688000  |
| C | -2.404096000 | 3.407194000  | -0.894316000 |
| C | -2.404096000 | -3.407194000 | 0.894316000  |
| C | -2.678236000 | 4.679052000  | -1.425848000 |
| C | -2.678236000 | -4.679052000 | 1.425848000  |
| C | -2.780785000 | 1.195026000  | -0.367688000 |
| C | -2.780785000 | -1.195026000 | 0.367688000  |
| C | -3.407194000 | 2.404096000  | -0.894316000 |
| C | -3.407194000 | -2.404096000 | 0.894316000  |
| C | -3.422310000 | 0.000000000  | 0.000000000  |
| C | -3.943103000 | 4.935879000  | -1.941578000 |
| C | -3.943103000 | -4.935879000 | 1.941578000  |
| C | -4.679052000 | 2.678236000  | -1.425848000 |
| C | -4.679052000 | -2.678236000 | 1.425848000  |
| C | -4.912946000 | 0.000000000  | 0.000000000  |
| C | -4.935879000 | 3.943103000  | -1.941578000 |
| C | -4.935879000 | -3.943103000 | 1.941578000  |
| C | -5.621954000 | 0.711917000  | 0.974752000  |
| C | -5.621954000 | -0.711917000 | -0.974752000 |
| C | -7.016804000 | 0.709938000  | 0.978415000  |
| C | -7.016804000 | -0.709938000 | -0.978415000 |
| C | -7.718227000 | 0.000000000  | 0.000000000  |
| H | 0.000000000  | 8.807713000  | 0.000000000  |
| H | 0.000000000  | -8.807713000 | 0.000000000  |
| H | 1.265117000  | 7.556748000  | -1.744066000 |
| H | 1.265117000  | -7.556748000 | 1.744066000  |
| H | 1.269115000  | 5.067147000  | -1.728259000 |
| H | 1.269115000  | -5.067147000 | 1.728259000  |
| H | 1.918470000  | 5.453844000  | 1.462308000  |
| H | 1.918470000  | -5.453844000 | -1.462308000 |
| H | 4.158281000  | 5.916100000  | 2.364778000  |
| H | 4.158281000  | -5.916100000 | -2.364778000 |
| H | 5.067147000  | 1.269115000  | -1.728259000 |
| H | 5.067147000  | -1.269115000 | 1.728259000  |
| H | 5.453844000  | 1.918470000  | 1.462308000  |

|   |              |              |              |
|---|--------------|--------------|--------------|
| H | 5.453844000  | -1.918470000 | -1.462308000 |
| H | 5.916100000  | 4.158281000  | 2.364778000  |
| H | 5.916100000  | -4.158281000 | -2.364778000 |
| H | 7.556748000  | 1.265117000  | -1.744066000 |
| H | 7.556748000  | -1.265117000 | 1.744066000  |
| H | 8.807713000  | 0.000000000  | 0.000000000  |
| H | -1.265117000 | 7.556748000  | 1.744066000  |
| H | -1.265117000 | -7.556748000 | -1.744066000 |
| H | -1.269115000 | 5.067147000  | 1.728259000  |
| H | -1.269115000 | -5.067147000 | -1.728259000 |
| H | -1.918470000 | 5.453844000  | -1.462308000 |
| H | -1.918470000 | -5.453844000 | 1.462308000  |
| H | -4.158281000 | 5.916100000  | -2.364778000 |
| H | -4.158281000 | -5.916100000 | 2.364778000  |
| H | -5.067147000 | 1.269115000  | 1.728259000  |
| H | -5.067147000 | -1.269115000 | -1.728259000 |
| H | -5.453844000 | 1.918470000  | -1.462308000 |
| H | -5.453844000 | -1.918470000 | 1.462308000  |
| H | -5.916100000 | 4.158281000  | -2.364778000 |
| H | -5.916100000 | -4.158281000 | 2.364778000  |
| H | -7.556748000 | 1.265117000  | 1.744066000  |
| H | -7.556748000 | -1.265117000 | -1.744066000 |
| H | -8.807713000 | 0.000000000  | 0.000000000  |
| N | 1.441094000  | 1.441094000  | 0.163841000  |
| N | 1.441094000  | -1.441094000 | -0.163841000 |
| N | -1.441094000 | 1.441094000  | -0.163841000 |
| N | -1.441094000 | -1.441094000 | 0.163841000  |

**70. Zn[Ph<sub>4</sub>Bz<sub>8</sub>]; S = 0 (ruffled)**

|    |             |              |              |
|----|-------------|--------------|--------------|
| Zn | 0.000000000 | 0.000000000  | 0.001272000  |
| C  | 0.000000000 | 3.363373000  | -0.561528000 |
| C  | 0.000000000 | 4.804303000  | -0.949395000 |
| C  | 0.000000000 | 5.171180000  | -2.297684000 |
| C  | 0.000000000 | 5.802024000  | 0.032586000  |
| C  | 0.000000000 | 6.519117000  | -2.663107000 |
| C  | 0.000000000 | 7.148208000  | -0.328218000 |
| C  | 0.000000000 | 7.510384000  | -1.678556000 |
| C  | 0.000000000 | -3.363373000 | -0.561528000 |
| C  | 0.000000000 | -4.804303000 | -0.949395000 |
| C  | 0.000000000 | -5.171180000 | -2.297684000 |
| C  | 0.000000000 | -5.802024000 | 0.032586000  |
| C  | 0.000000000 | -6.519117000 | -2.663107000 |
| C  | 0.000000000 | -7.148208000 | -0.328218000 |
| C  | 0.000000000 | -7.510384000 | -1.678556000 |
| C  | 1.255202000 | 2.770903000  | -0.335940000 |
| C  | 1.255202000 | -2.770903000 | -0.335940000 |
| C  | 2.539057000 | 3.470172000  | -0.264717000 |
| C  | 2.539057000 | -3.470172000 | -0.264717000 |
| C  | 2.771043000 | 1.255191000  | 0.337318000  |

|   |              |              |              |
|---|--------------|--------------|--------------|
| C | 2.771043000  | -1.255191000 | 0.337318000  |
| C | 2.962106000  | 4.771689000  | -0.591581000 |
| C | 2.962106000  | -4.771689000 | -0.591581000 |
| C | 3.363619000  | 0.000000000  | 0.562677000  |
| C | 3.470294000  | 2.539034000  | 0.265708000  |
| C | 3.470294000  | -2.539034000 | 0.265708000  |
| C | 4.267178000  | 5.156058000  | -0.309358000 |
| C | 4.267178000  | -5.156058000 | -0.309358000 |
| C | 4.771910000  | 2.962119000  | 0.592140000  |
| C | 4.771910000  | -2.962119000 | 0.592140000  |
| C | 4.804980000  | 0.000000000  | 0.948932000  |
| C | 5.156170000  | 4.267188000  | 0.309735000  |
| C | 5.156170000  | -4.267188000 | 0.309735000  |
| C | 5.173266000  | 0.000000000  | 2.296837000  |
| C | 5.801679000  | 0.000000000  | -0.034080000 |
| C | 6.521580000  | 0.000000000  | 2.660862000  |
| C | 7.148234000  | 0.000000000  | 0.325318000  |
| C | 7.511822000  | 0.000000000  | 1.675276000  |
| C | -1.255202000 | 2.770903000  | -0.335940000 |
| C | -1.255202000 | -2.770903000 | -0.335940000 |
| C | -2.539057000 | 3.470172000  | -0.264717000 |
| C | -2.539057000 | -3.470172000 | -0.264717000 |
| C | -2.771043000 | 1.255191000  | 0.337318000  |
| C | -2.771043000 | -1.255191000 | 0.337318000  |
| C | -2.962106000 | 4.771689000  | -0.591581000 |
| C | -2.962106000 | -4.771689000 | -0.591581000 |
| C | -3.363619000 | 0.000000000  | 0.562677000  |
| C | -3.470294000 | 2.539034000  | 0.265708000  |
| C | -3.470294000 | -2.539034000 | 0.265708000  |
| C | -4.267178000 | 5.156058000  | -0.309358000 |
| C | -4.267178000 | -5.156058000 | -0.309358000 |
| C | -4.771910000 | 2.962119000  | 0.592140000  |
| C | -4.771910000 | -2.962119000 | 0.592140000  |
| C | -4.804980000 | 0.000000000  | 0.948932000  |
| C | -5.156170000 | 4.267188000  | 0.309735000  |
| C | -5.156170000 | -4.267188000 | 0.309735000  |
| C | -5.173266000 | 0.000000000  | 2.296837000  |
| C | -5.801679000 | 0.000000000  | -0.034080000 |
| C | -6.521580000 | 0.000000000  | 2.660862000  |
| C | -7.148234000 | 0.000000000  | 0.325318000  |
| C | -7.511822000 | 0.000000000  | 1.675276000  |
| H | 0.000000000  | 4.391623000  | -3.058120000 |
| H | 0.000000000  | 5.508503000  | 1.080958000  |
| H | 0.000000000  | 6.794585000  | -3.716658000 |
| H | 0.000000000  | 7.915685000  | 0.444203000  |
| H | 0.000000000  | 8.562135000  | -1.962681000 |
| H | 0.000000000  | -4.391623000 | -3.058120000 |
| H | 0.000000000  | -5.508503000 | 1.080958000  |
| H | 0.000000000  | -6.794585000 | -3.716658000 |
| H | 0.000000000  | -7.915685000 | 0.444203000  |
| H | 0.000000000  | -8.562135000 | -1.962681000 |

|   |              |              |              |
|---|--------------|--------------|--------------|
| H | 2.299922000  | 5.483963000  | -1.069446000 |
| H | 2.299922000  | -5.483963000 | -1.069446000 |
| H | 4.394517000  | 0.000000000  | 3.058091000  |
| H | 4.592860000  | 6.163645000  | -0.564188000 |
| H | 4.592860000  | -6.163645000 | -0.564188000 |
| H | 5.484340000  | 2.299960000  | 1.069810000  |
| H | 5.484340000  | -2.299960000 | 1.069810000  |
| H | 5.507062000  | 0.000000000  | -1.082141000 |
| H | 6.163804000  | 4.592931000  | 0.564291000  |
| H | 6.163804000  | -4.592931000 | 0.564291000  |
| H | 6.798128000  | 0.000000000  | 3.714131000  |
| H | 7.914915000  | 0.000000000  | -0.447886000 |
| H | 8.563875000  | 0.000000000  | 1.958281000  |
| H | -2.299922000 | 5.483963000  | -1.069446000 |
| H | -2.299922000 | -5.483963000 | -1.069446000 |
| H | -4.394517000 | 0.000000000  | 3.058091000  |
| H | -4.592860000 | 6.163645000  | -0.564188000 |
| H | -4.592860000 | -6.163645000 | -0.564188000 |
| H | -5.484340000 | 2.299960000  | 1.069810000  |
| H | -5.484340000 | -2.299960000 | 1.069810000  |
| H | -5.507062000 | 0.000000000  | -1.082141000 |
| H | -6.163804000 | 4.592931000  | 0.564291000  |
| H | -6.163804000 | -4.592931000 | 0.564291000  |
| H | -6.798128000 | 0.000000000  | 3.714131000  |
| H | -7.914915000 | 0.000000000  | -0.447886000 |
| H | -8.563875000 | 0.000000000  | 1.958281000  |
| N | 1.449069000  | 1.449017000  | 0.000848000  |
| N | 1.449069000  | -1.449017000 | 0.000848000  |
| N | -1.449069000 | 1.449017000  | 0.000848000  |
| N | -1.449069000 | -1.449017000 | 0.000848000  |

**71. Cu[A<sub>4</sub>Bz<sub>8</sub>]; S = ½ (saddled)**

|    |             |              |              |
|----|-------------|--------------|--------------|
| Cu | 0.000000000 | 0.000000000  | 0.003401000  |
| C  | 0.193723000 | -5.208026000 | -1.788268000 |
| C  | 0.301707000 | 2.903864000  | -0.635086000 |
| C  | 0.499530000 | -4.017736000 | -1.112603000 |
| C  | 1.231136000 | -6.068934000 | -2.130006000 |
| C  | 1.688972000 | 2.900030000  | -0.392921000 |
| C  | 1.819513000 | -2.380704000 | -0.190008000 |
| C  | 1.844303000 | -3.700256000 | -0.795212000 |
| C  | 2.379072000 | 1.818188000  | 0.198227000  |
| C  | 2.433944000 | 4.056964000  | -0.715371000 |
| C  | 2.563034000 | -5.757580000 | -1.809916000 |
| C  | 2.809022000 | 7.617717000  | -2.510103000 |
| C  | 2.881408000 | -4.577317000 | -1.146717000 |
| C  | 2.902001000 | -1.689214000 | 0.398218000  |
| C  | 2.902896000 | -0.302451000 | 0.644212000  |
| C  | 3.084800000 | 5.048267000  | -1.016125000 |



|   |              |              |              |
|---|--------------|--------------|--------------|
| C | 3.696688000  | 1.844292000  | 0.807130000  |
| C | 4.014233000  | 0.499902000  | 1.125856000  |
| C | 4.065495000  | -2.428586000 | 0.710450000  |
| C | 4.430752000  | 7.477482000  | 0.131863000  |
| C | 4.569757000  | 2.882916000  | 1.163882000  |
| C | 5.065482000  | -3.070939000 | 1.000640000  |
| C | 5.200362000  | 0.195940000  | 1.809605000  |
| C | 5.533344000  | 6.125234000  | -2.418039000 |
| C | 5.746536000  | 2.566295000  | 1.834046000  |
| C | 6.057531000  | 1.234791000  | 2.156531000  |
| C | 6.154322000  | -5.595628000 | 2.243203000  |
| C | 7.552750000  | -2.846013000 | 2.637543000  |
| C | 7.596635000  | -4.239752000 | -0.130072000 |
| C | -0.193723000 | 5.208026000  | -1.788268000 |
| C | -0.301707000 | -2.903864000 | -0.635086000 |
| C | -0.499530000 | 4.017736000  | -1.112603000 |
| C | -1.231136000 | 6.068934000  | -2.130006000 |
| C | -1.688972000 | -2.900030000 | -0.392921000 |
| C | -1.819513000 | 2.380704000  | -0.190008000 |
| C | -1.844303000 | 3.700256000  | -0.795212000 |
| C | -2.379072000 | -1.818188000 | 0.198227000  |
| C | -2.433944000 | -4.056964000 | -0.715371000 |
| C | -2.563034000 | 5.757580000  | -1.809916000 |
| C | -2.809022000 | -7.617717000 | -2.510103000 |
| C | -2.881408000 | 4.577317000  | -1.146717000 |
| C | -2.902001000 | 1.689214000  | 0.398218000  |
| C | -2.902896000 | 0.302451000  | 0.644212000  |
| C | -3.084800000 | -5.048267000 | -1.016125000 |
| C | -3.696688000 | -1.844292000 | 0.807130000  |
| C | -4.014233000 | -0.499902000 | 1.125856000  |
| C | -4.065495000 | 2.428586000  | 0.710450000  |
| C | -4.430752000 | -7.477482000 | 0.131863000  |
| C | -4.569757000 | -2.882916000 | 1.163882000  |
| C | -5.065482000 | 3.070939000  | 1.000640000  |
| C | -5.200362000 | -0.195940000 | 1.809605000  |
| C | -5.533344000 | -6.125234000 | -2.418039000 |
| C | -5.746536000 | -2.566295000 | 1.834046000  |
| C | -6.057531000 | -1.234791000 | 2.156531000  |
| C | -6.154322000 | 5.595628000  | 2.243203000  |
| C | -7.552750000 | 2.846013000  | 2.637543000  |
| C | -7.596635000 | 4.239752000  | -0.130072000 |
| H | 0.827993000  | 5.445893000  | -2.058546000 |
| H | 1.006160000  | -6.990106000 | -2.665866000 |
| H | 1.889613000  | 7.847695000  | -1.952855000 |
| H | 2.527912000  | 7.080257000  | -3.427252000 |
| H | 3.280864000  | 8.567975000  | -2.802151000 |
| H | 3.360008000  | -6.442431000 | -2.096579000 |
| H | 3.529243000  | 7.717892000  | 0.712861000  |
| H | 3.913700000  | -4.335152000 | -0.918565000 |
| H | 4.326675000  | 3.914990000  | 0.935256000  |
| H | 4.963614000  | 8.415582000  | -0.086174000 |

|    |              |              |              |
|----|--------------|--------------|--------------|
| H  | 5.082985000  | 6.852726000  | 0.759265000  |
| H  | 5.282342000  | 5.578794000  | -3.338093000 |
| H  | 5.436954000  | -0.825240000 | 2.083187000  |
| H  | 5.555819000  | -5.439710000 | 3.151771000  |
| H  | 5.561926000  | -6.211140000 | 1.550908000  |
| H  | 6.099878000  | 7.027571000  | -2.694344000 |
| H  | 6.185889000  | 5.481643000  | -1.810675000 |
| H  | 6.428208000  | 3.364329000  | 2.125319000  |
| H  | 6.957789000  | -2.643690000 | 3.539708000  |
| H  | 6.975087000  | 1.011632000  | 2.699308000  |
| H  | 7.029129000  | -4.855212000 | -0.843038000 |
| H  | 7.059535000  | -6.159020000 | 2.516366000  |
| H  | 7.794452000  | -1.883818000 | 2.163606000  |
| H  | 7.833366000  | -3.284568000 | -0.619681000 |
| H  | 8.495496000  | -3.320920000 | 2.948530000  |
| H  | 8.541313000  | -4.758667000 | 0.093341000  |
| H  | -0.827993000 | -5.445893000 | -2.058546000 |
| H  | -1.006160000 | 6.990106000  | -2.665866000 |
| H  | -1.889613000 | -7.847695000 | -1.952855000 |
| H  | -2.527912000 | -7.080257000 | -3.427252000 |
| H  | -3.280864000 | -8.567975000 | -2.802151000 |
| H  | -3.360008000 | 6.442431000  | -2.096579000 |
| H  | -3.529243000 | -7.717892000 | 0.712861000  |
| H  | -3.913700000 | 4.335152000  | -0.918565000 |
| H  | -4.326675000 | -3.914990000 | 0.935256000  |
| H  | -4.963614000 | -8.415582000 | -0.086174000 |
| H  | -5.082985000 | -6.852726000 | 0.759265000  |
| H  | -5.282342000 | -5.578794000 | -3.338093000 |
| H  | -5.436954000 | 0.825240000  | 2.083187000  |
| H  | -5.555819000 | 5.439710000  | 3.151771000  |
| H  | -5.561926000 | 6.211140000  | 1.550908000  |
| H  | -6.099878000 | -7.027571000 | -2.694344000 |
| H  | -6.185889000 | -5.481643000 | -1.810675000 |
| H  | -6.428208000 | -3.364329000 | 2.125319000  |
| H  | -6.957789000 | 2.643690000  | 3.539708000  |
| H  | -6.975087000 | -1.011632000 | 2.699308000  |
| H  | -7.029129000 | 4.855212000  | -0.843038000 |
| H  | -7.059535000 | 6.159020000  | 2.516366000  |
| H  | -7.794452000 | 1.883818000  | 2.163606000  |
| H  | -7.833366000 | 3.284568000  | -0.619681000 |
| H  | -8.495496000 | 3.320920000  | 2.948530000  |
| H  | -8.541313000 | 4.758667000  | 0.093341000  |
| N  | 0.534428000  | -1.904481000 | -0.190030000 |
| N  | 1.903510000  | 0.533166000  | 0.197908000  |
| N  | -0.534428000 | 1.904481000  | -0.190030000 |
| N  | -1.903510000 | -0.533166000 | 0.197908000  |
| Si | 3.980815000  | 6.580665000  | -1.460742000 |
| Si | 6.605572000  | -3.954685000 | 1.444292000  |
| Si | -3.980815000 | -6.580665000 | -1.460742000 |
| Si | -6.605572000 | 3.954685000  | 1.444292000  |

72. Cu[A<sub>4</sub>Bz<sub>8</sub>]; S = ½ (ruffled)

|    |              |              |              |
|----|--------------|--------------|--------------|
| Cu | 0.000000000  | 0.000000000  | 0.012244000  |
| C  | 0.000000000  | 3.252018000  | -0.795667000 |
| C  | 0.000000000  | 4.484105000  | -1.485580000 |
| C  | 0.000000000  | 5.520089000  | -2.136735000 |
| C  | 0.000000000  | 6.872952000  | -4.868389000 |
| C  | 0.000000000  | -3.252018000 | -0.795667000 |
| C  | 0.000000000  | -4.484105000 | -1.485580000 |
| C  | 0.000000000  | -5.520089000 | -2.136735000 |
| C  | 0.000000000  | -6.872952000 | -4.868389000 |
| C  | 1.244750000  | 2.692340000  | -0.432896000 |
| C  | 1.244750000  | -2.692340000 | -0.432896000 |
| C  | 1.554141000  | 8.044589000  | -2.444612000 |
| C  | 1.554141000  | -8.044589000 | -2.444612000 |
| C  | 2.504226000  | 3.406259000  | -0.300856000 |
| C  | 2.504226000  | -3.406259000 | -0.300856000 |
| C  | 2.693663000  | 1.244927000  | 0.454968000  |
| C  | 2.693663000  | -1.244927000 | 0.454968000  |
| C  | 2.911187000  | 4.714550000  | -0.605263000 |
| C  | 2.911187000  | -4.714550000 | -0.605263000 |
| C  | 3.254863000  | 0.000000000  | 0.815136000  |
| C  | 3.406832000  | 2.504870000  | 0.320896000  |
| C  | 3.406832000  | -2.504870000 | 0.320896000  |
| C  | 4.208600000  | 5.105754000  | -0.294919000 |
| C  | 4.208600000  | -5.105754000 | -0.294919000 |
| C  | 4.492923000  | 0.000000000  | 1.494012000  |
| C  | 4.714673000  | 2.914015000  | 0.624356000  |
| C  | 4.714673000  | -2.914015000 | 0.624356000  |
| C  | 5.104109000  | 4.211619000  | 0.312608000  |
| C  | 5.104109000  | -4.211619000 | 0.312608000  |
| C  | 5.537341000  | 0.000000000  | 2.131355000  |
| C  | 6.947852000  | 0.000000000  | 4.814733000  |
| C  | 8.072391000  | 1.556092000  | 2.384923000  |
| C  | 8.072391000  | -1.556092000 | 2.384923000  |
| C  | -1.244750000 | 2.692340000  | -0.432896000 |
| C  | -1.244750000 | -2.692340000 | -0.432896000 |
| C  | -1.554141000 | 8.044589000  | -2.444612000 |
| C  | -1.554141000 | -8.044589000 | -2.444612000 |
| C  | -2.504226000 | 3.406259000  | -0.300856000 |
| C  | -2.504226000 | -3.406259000 | -0.300856000 |
| C  | -2.693663000 | 1.244927000  | 0.454968000  |
| C  | -2.693663000 | -1.244927000 | 0.454968000  |
| C  | -2.911187000 | 4.714550000  | -0.605263000 |
| C  | -2.911187000 | -4.714550000 | -0.605263000 |
| C  | -3.254863000 | 0.000000000  | 0.815136000  |
| C  | -3.406832000 | 2.504870000  | 0.320896000  |
| C  | -3.406832000 | -2.504870000 | 0.320896000  |
| C  | -4.208600000 | 5.105754000  | -0.294919000 |
| C  | -4.208600000 | -5.105754000 | -0.294919000 |
| C  | -4.492923000 | 0.000000000  | 1.494012000  |

|   |              |              |              |
|---|--------------|--------------|--------------|
| C | -4.714673000 | 2.914015000  | 0.624356000  |
| C | -4.714673000 | -2.914015000 | 0.624356000  |
| C | -5.104109000 | 4.211619000  | 0.312608000  |
| C | -5.104109000 | -4.211619000 | 0.312608000  |
| C | -5.537341000 | 0.000000000  | 2.131355000  |
| C | -6.947852000 | 0.000000000  | 4.814733000  |
| C | -8.072391000 | 1.556092000  | 2.384923000  |
| C | -8.072391000 | -1.556092000 | 2.384923000  |
| H | 0.000000000  | 5.802023000  | -5.112367000 |
| H | 0.000000000  | -5.802023000 | -5.112367000 |
| H | 0.890020000  | 7.325935000  | -5.328756000 |
| H | 0.890020000  | -7.325935000 | -5.328756000 |
| H | 1.569878000  | 8.171393000  | -1.352840000 |
| H | 1.569878000  | -8.171393000 | -1.352840000 |
| H | 1.610878000  | 9.040281000  | -2.910014000 |
| H | 1.610878000  | -9.040281000 | -2.910014000 |
| H | 2.229529000  | 5.410474000  | -1.078989000 |
| H | 2.229529000  | -5.410474000 | -1.078989000 |
| H | 2.452185000  | 7.481235000  | -2.737261000 |
| H | 2.452185000  | -7.481235000 | -2.737261000 |
| H | 4.531686000  | 6.119098000  | -0.529268000 |
| H | 4.531686000  | -6.119098000 | -0.529268000 |
| H | 5.411590000  | 2.233946000  | 1.098591000  |
| H | 5.411590000  | -2.233946000 | 1.098591000  |
| H | 6.117217000  | 4.536032000  | 0.546217000  |
| H | 6.117217000  | -4.536032000 | 0.546217000  |
| H | 6.389469000  | 0.889312000  | 5.139884000  |
| H | 6.389469000  | -0.889312000 | 5.139884000  |
| H | 7.516237000  | 2.454188000  | 2.690335000  |
| H | 7.516237000  | -2.454188000 | 2.690335000  |
| H | 7.924094000  | 0.000000000  | 5.323273000  |
| H | 8.175517000  | 1.573981000  | 1.290660000  |
| H | 8.175517000  | -1.573981000 | 1.290660000  |
| H | 9.078360000  | 1.611723000  | 2.827442000  |
| H | 9.078360000  | -1.611723000 | 2.827442000  |
| H | -0.890020000 | 7.325935000  | -5.328756000 |
| H | -0.890020000 | -7.325935000 | -5.328756000 |
| H | -1.569878000 | 8.171393000  | -1.352840000 |
| H | -1.569878000 | -8.171393000 | -1.352840000 |
| H | -1.610878000 | 9.040281000  | -2.910014000 |
| H | -1.610878000 | -9.040281000 | -2.910014000 |
| H | -2.229529000 | 5.410474000  | -1.078989000 |
| H | -2.229529000 | -5.410474000 | -1.078989000 |
| H | -2.452185000 | 7.481235000  | -2.737261000 |
| H | -2.452185000 | -7.481235000 | -2.737261000 |
| H | -4.531686000 | 6.119098000  | -0.529268000 |
| H | -4.531686000 | -6.119098000 | -0.529268000 |
| H | -5.411590000 | 2.233946000  | 1.098591000  |
| H | -5.411590000 | -2.233946000 | 1.098591000  |
| H | -6.117217000 | 4.536032000  | 0.546217000  |
| H | -6.117217000 | -4.536032000 | 0.546217000  |

|    |              |              |              |
|----|--------------|--------------|--------------|
| H  | -6.389469000 | 0.889312000  | 5.139884000  |
| H  | -6.389469000 | -0.889312000 | 5.139884000  |
| H  | -7.516237000 | 2.454188000  | 2.690335000  |
| H  | -7.516237000 | -2.454188000 | 2.690335000  |
| H  | -7.924094000 | 0.000000000  | 5.323273000  |
| H  | -8.175517000 | 1.573981000  | 1.290660000  |
| H  | -8.175517000 | -1.573981000 | 1.290660000  |
| H  | -9.078360000 | 1.611723000  | 2.827442000  |
| H  | -9.078360000 | -1.611723000 | 2.827442000  |
| N  | 1.405274000  | 1.404878000  | 0.012111000  |
| N  | 1.405274000  | -1.404878000 | 0.012111000  |
| N  | -1.405274000 | 1.404878000  | 0.012111000  |
| N  | -1.405274000 | -1.404878000 | 0.012111000  |
| Si | 0.000000000  | 7.135096000  | -2.996820000 |
| Si | 0.000000000  | -7.135096000 | -2.996820000 |
| Si | 7.173820000  | 0.000000000  | 2.949290000  |
| Si | -7.173820000 | 0.000000000  | 2.949290000  |

**73. Ni[A<sub>4</sub>Bz<sub>8</sub>]; S = 0 (saddled)**

|    |              |              |              |
|----|--------------|--------------|--------------|
| Ni | 0.000000000  | 0.000000000  | 0.002568000  |
| C  | 0.210984000  | 2.781247000  | -0.801051000 |
| C  | 0.454402000  | -5.080021000 | -1.866322000 |
| C  | 0.643648000  | -3.907119000 | -1.122133000 |
| C  | 1.506805000  | -5.985368000 | -1.961004000 |
| C  | 1.613341000  | 2.777235000  | -0.780759000 |
| C  | 1.780536000  | -2.327081000 | 0.092179000  |
| C  | 1.886483000  | -3.648955000 | -0.490799000 |
| C  | 2.326883000  | 1.779321000  | -0.089112000 |
| C  | 2.328047000  | 3.849356000  | -1.356341000 |
| C  | 2.608629000  | 7.101862000  | -3.703157000 |
| C  | 2.734378000  | -5.736879000 | -1.323995000 |
| C  | 2.779327000  | -1.613853000 | 0.783023000  |
| C  | 2.782231000  | -0.211464000 | 0.804682000  |
| C  | 2.937205000  | -4.572987000 | -0.589428000 |
| C  | 2.954971000  | 4.762756000  | -1.875256000 |
| C  | 3.649106000  | 1.886081000  | 0.492919000  |
| C  | 3.854187000  | -2.327604000 | 1.354939000  |
| C  | 3.907968000  | 0.643747000  | 1.124942000  |
| C  | 4.428439000  | 7.288423000  | -1.199653000 |
| C  | 4.572629000  | 2.937351000  | 0.590585000  |
| C  | 4.770807000  | -2.952437000 | 1.870846000  |
| C  | 5.080983000  | 0.455768000  | 1.869320000  |
| C  | 5.303262000  | 5.552096000  | -3.601600000 |
| C  | 5.572134000  | -5.394088000 | 3.451613000  |
| C  | 5.736915000  | 2.735563000  | 1.324793000  |
| C  | 5.985982000  | 1.508591000  | 1.962791000  |
| C  | 6.999938000  | -2.658247000 | 3.843220000  |
| C  | 7.394441000  | -4.264915000 | 1.224587000  |
| C  | -0.210984000 | -2.781247000 | -0.801051000 |

|   |              |              |              |
|---|--------------|--------------|--------------|
| C | -0.454402000 | 5.080021000  | -1.866322000 |
| C | -0.643648000 | 3.907119000  | -1.122133000 |
| C | -1.506805000 | 5.985368000  | -1.961004000 |
| C | -1.613341000 | -2.777235000 | -0.780759000 |
| C | -1.780536000 | 2.327081000  | 0.092179000  |
| C | -1.886483000 | 3.648955000  | -0.490799000 |
| C | -2.326883000 | -1.779321000 | -0.089112000 |
| C | -2.328047000 | -3.849356000 | -1.356341000 |
| C | -2.608629000 | -7.101862000 | -3.703157000 |
| C | -2.734378000 | 5.736879000  | -1.323995000 |
| C | -2.779327000 | 1.613853000  | 0.783023000  |
| C | -2.782231000 | 0.211464000  | 0.804682000  |
| C | -2.937205000 | 4.572987000  | -0.589428000 |
| C | -2.954971000 | -4.762756000 | -1.875256000 |
| C | -3.649106000 | -1.886081000 | 0.492919000  |
| C | -3.854187000 | 2.327604000  | 1.354939000  |
| C | -3.907968000 | -0.643747000 | 1.124942000  |
| C | -4.428439000 | -7.288423000 | -1.199653000 |
| C | -4.572629000 | -2.937351000 | 0.590585000  |
| C | -4.770807000 | 2.952437000  | 1.870846000  |
| C | -5.080983000 | -0.455768000 | 1.869320000  |
| C | -5.303262000 | -5.552096000 | -3.601600000 |
| C | -5.572134000 | 5.394088000  | 3.451613000  |
| C | -5.736915000 | -2.735563000 | 1.324793000  |
| C | -5.985982000 | -1.508591000 | 1.962791000  |
| C | -6.999938000 | 2.658247000  | 3.843220000  |
| C | -7.394441000 | 4.264915000  | 1.224587000  |
| H | 0.483870000  | 5.269046000  | -2.375445000 |
| H | 1.379299000  | -6.894017000 | -2.547773000 |
| H | 1.755523000  | 7.462822000  | -3.110875000 |
| H | 2.222235000  | 6.440689000  | -4.491986000 |
| H | 3.082046000  | 7.970566000  | -4.185068000 |
| H | 3.543796000  | -6.459921000 | -1.415596000 |
| H | 3.578937000  | 7.632572000  | -0.592974000 |
| H | 3.891486000  | -4.380633000 | -0.110301000 |
| H | 4.379342000  | 3.891483000  | 0.111533000  |
| H | 4.851590000  | -5.153139000 | 4.245796000  |
| H | 4.957189000  | 8.171685000  | -1.589305000 |
| H | 4.972189000  | 4.885935000  | -4.410677000 |
| H | 5.067937000  | -6.048156000 | 2.725626000  |
| H | 5.117363000  | 6.741631000  | -0.539661000 |
| H | 5.269701000  | -0.481783000 | 2.379964000  |
| H | 5.863580000  | 6.387771000  | -4.047872000 |
| H | 5.988863000  | 4.984491000  | -2.955975000 |
| H | 6.282842000  | -2.355519000 | 4.619492000  |
| H | 6.406448000  | -5.955595000 | 3.898876000  |
| H | 6.459522000  | 3.545470000  | 1.415665000  |
| H | 6.894825000  | 1.382146000  | 2.549510000  |
| H | 6.915747000  | -4.921034000 | 0.483360000  |
| H | 7.360302000  | -1.750629000 | 3.337892000  |
| H | 7.732082000  | -3.356900000 | 0.705235000  |

|    |              |              |              |
|----|--------------|--------------|--------------|
| H  | 7.859000000  | -3.137383000 | 4.336743000  |
| H  | 8.278528000  | -4.785929000 | 1.622798000  |
| H  | -0.483870000 | -5.269046000 | -2.375445000 |
| H  | -1.379299000 | 6.894017000  | -2.547773000 |
| H  | -1.755523000 | -7.462822000 | -3.110875000 |
| H  | -2.222235000 | -6.440689000 | -4.491986000 |
| H  | -3.082046000 | -7.970566000 | -4.185068000 |
| H  | -3.543796000 | 6.459921000  | -1.415596000 |
| H  | -3.578937000 | -7.632572000 | -0.592974000 |
| H  | -3.891486000 | 4.380633000  | -0.110301000 |
| H  | -4.379342000 | -3.891483000 | 0.111533000  |
| H  | -4.851590000 | 5.153139000  | 4.245796000  |
| H  | -4.957189000 | -8.171685000 | -1.589305000 |
| H  | -4.972189000 | -4.885935000 | -4.410677000 |
| H  | -5.067937000 | 6.048156000  | 2.725626000  |
| H  | -5.117363000 | -6.741631000 | -0.539661000 |
| H  | -5.269701000 | 0.481783000  | 2.379964000  |
| H  | -5.863580000 | -6.387771000 | -4.047872000 |
| H  | -5.988863000 | -4.984491000 | -2.955975000 |
| H  | -6.282842000 | 2.355519000  | 4.619492000  |
| H  | -6.406448000 | 5.955595000  | 3.898876000  |
| H  | -6.459522000 | -3.545470000 | 1.415665000  |
| H  | -6.894825000 | -1.382146000 | 2.549510000  |
| H  | -6.915747000 | 4.921034000  | 0.483360000  |
| H  | -7.360302000 | 1.750629000  | 3.337892000  |
| H  | -7.732082000 | 3.356900000  | 0.705235000  |
| H  | -7.859000000 | 3.137383000  | 4.336743000  |
| H  | -8.278528000 | 4.785929000  | 1.622798000  |
| N  | 0.538959000  | -1.807151000 | -0.168771000 |
| N  | 1.807138000  | 0.538196000  | 0.173417000  |
| N  | -0.538959000 | 1.807151000  | -0.168771000 |
| N  | -1.807138000 | -0.538196000 | 0.173417000  |
| Si | 3.839133000  | 6.187991000  | -2.608695000 |
| Si | 6.195794000  | -3.832894000 | 2.610083000  |
| Si | -3.839133000 | -6.187991000 | -2.608695000 |
| Si | -6.195794000 | 3.832894000  | 2.610083000  |

**74. Ni[A<sub>4</sub>Bz<sub>8</sub>]; S = 0 (ruffled)**

|    |             |              |              |
|----|-------------|--------------|--------------|
| Ni | 0.000000000 | 0.000000000  | 0.017026000  |
| C  | 0.000000000 | 3.119639000  | -0.992637000 |
| C  | 0.000000000 | 4.296517000  | -1.769179000 |
| C  | 0.000000000 | 5.289295000  | -2.484512000 |
| C  | 0.000000000 | 6.474613000  | -5.293231000 |
| C  | 0.000000000 | -3.119639000 | -0.992637000 |
| C  | 0.000000000 | -4.296517000 | -1.769179000 |
| C  | 0.000000000 | -5.289295000 | -2.484512000 |
| C  | 0.000000000 | -6.474613000 | -5.293231000 |
| C  | 1.223611000 | 2.582894000  | -0.551059000 |
| C  | 1.223611000 | -2.582894000 | -0.551059000 |

|   |              |              |              |
|---|--------------|--------------|--------------|
| C | 1.553946000  | 7.790922000  | -2.944920000 |
| C | 1.553946000  | -7.790922000 | -2.944920000 |
| C | 2.470466000  | 3.303287000  | -0.382382000 |
| C | 2.470466000  | -3.303287000 | -0.382382000 |
| C | 2.585002000  | 1.223908000  | 0.580635000  |
| C | 2.585002000  | -1.223908000 | 0.580635000  |
| C | 2.911315000  | 4.573920000  | -0.780830000 |
| C | 2.911315000  | -4.573920000 | -0.780830000 |
| C | 3.124475000  | 0.000000000  | 1.018343000  |
| C | 3.304103000  | 2.471468000  | 0.409443000  |
| C | 3.304103000  | -2.471468000 | 0.409443000  |
| C | 4.174154000  | 4.999481000  | -0.382280000 |
| C | 4.174154000  | -4.999481000 | -0.382280000 |
| C | 4.311168000  | 0.000000000  | 1.779675000  |
| C | 4.573993000  | 2.915567000  | 0.806751000  |
| C | 4.573993000  | -2.915567000 | 0.806751000  |
| C | 4.996771000  | 4.178890000  | 0.406759000  |
| C | 4.996771000  | -4.178890000 | 0.406759000  |
| C | 5.317096000  | 0.000000000  | 2.476182000  |
| C | 6.580656000  | 0.000000000  | 5.231756000  |
| C | 7.835365000  | 1.555673000  | 2.866227000  |
| C | 7.835365000  | -1.555673000 | 2.866227000  |
| C | -1.223611000 | 2.582894000  | -0.551059000 |
| C | -1.223611000 | -2.582894000 | -0.551059000 |
| C | -1.553946000 | 7.790922000  | -2.944920000 |
| C | -1.553946000 | -7.790922000 | -2.944920000 |
| C | -2.470466000 | 3.303287000  | -0.382382000 |
| C | -2.470466000 | -3.303287000 | -0.382382000 |
| C | -2.585002000 | 1.223908000  | 0.580635000  |
| C | -2.585002000 | -1.223908000 | 0.580635000  |
| C | -2.911315000 | 4.573920000  | -0.780830000 |
| C | -2.911315000 | -4.573920000 | -0.780830000 |
| C | -3.124475000 | 0.000000000  | 1.018343000  |
| C | -3.304103000 | 2.471468000  | 0.409443000  |
| C | -3.304103000 | -2.471468000 | 0.409443000  |
| C | -4.174154000 | 4.999481000  | -0.382280000 |
| C | -4.174154000 | -4.999481000 | -0.382280000 |
| C | -4.311168000 | 0.000000000  | 1.779675000  |
| C | -4.573993000 | 2.915567000  | 0.806751000  |
| C | -4.573993000 | -2.915567000 | 0.806751000  |
| C | -4.996771000 | 4.178890000  | 0.406759000  |
| C | -4.996771000 | -4.178890000 | 0.406759000  |
| C | -5.317096000 | 0.000000000  | 2.476182000  |
| C | -6.580656000 | 0.000000000  | 5.231756000  |
| C | -7.835365000 | 1.555673000  | 2.866227000  |
| C | -7.835365000 | -1.555673000 | 2.866227000  |
| H | 0.000000000  | 5.390990000  | -5.472445000 |
| H | 0.000000000  | -5.390990000 | -5.472445000 |
| H | 0.889961000  | 6.899078000  | -5.780146000 |
| H | 0.889961000  | -6.899078000 | -5.780146000 |
| H | 1.571601000  | 7.978878000  | -1.862060000 |



|   |              |              |              |
|---|--------------|--------------|--------------|
| H | 1.571601000  | -7.978878000 | -1.862060000 |
| H | 1.607912000  | 8.758852000  | -3.465938000 |
| H | 1.607912000  | -8.758852000 | -3.465938000 |
| H | 2.283511000  | 5.211718000  | -1.392693000 |
| H | 2.283511000  | -5.211718000 | -1.392693000 |
| H | 2.452387000  | 7.213432000  | -3.207379000 |
| H | 2.452387000  | -7.213432000 | -3.207379000 |
| H | 4.527885000  | 5.983079000  | -0.688039000 |
| H | 4.527885000  | -5.983079000 | -0.688039000 |
| H | 5.213403000  | 2.289925000  | 1.418890000  |
| H | 5.213403000  | -2.289925000 | 1.418890000  |
| H | 5.979834000  | 4.534771000  | 0.711769000  |
| H | 5.979834000  | -4.534771000 | 0.711769000  |
| H | 6.005669000  | 0.889308000  | 5.526528000  |
| H | 6.005669000  | -0.889308000 | 5.526528000  |
| H | 7.266338000  | 2.454387000  | 3.144974000  |
| H | 7.266338000  | -2.454387000 | 3.144974000  |
| H | 7.528025000  | 0.000000000  | 5.792239000  |
| H | 7.992910000  | 1.574974000  | 1.778523000  |
| H | 7.992910000  | -1.574974000 | 1.778523000  |
| H | 8.818022000  | 1.608547000  | 3.358708000  |
| H | 8.818022000  | -1.608547000 | 3.358708000  |
| H | -0.889961000 | 6.899078000  | -5.780146000 |
| H | -0.889961000 | -6.899078000 | -5.780146000 |
| H | -1.571601000 | 7.978878000  | -1.862060000 |
| H | -1.571601000 | -7.978878000 | -1.862060000 |
| H | -1.607912000 | 8.758852000  | -3.465938000 |
| H | -1.607912000 | -8.758852000 | -3.465938000 |
| H | -2.283511000 | 5.211718000  | -1.392693000 |
| H | -2.283511000 | -5.211718000 | -1.392693000 |
| H | -2.452387000 | 7.213432000  | -3.207379000 |
| H | -2.452387000 | -7.213432000 | -3.207379000 |
| H | -4.527885000 | 5.983079000  | -0.688039000 |
| H | -4.527885000 | -5.983079000 | -0.688039000 |
| H | -5.213403000 | 2.289925000  | 1.418890000  |
| H | -5.213403000 | -2.289925000 | 1.418890000  |
| H | -5.979834000 | 4.534771000  | 0.711769000  |
| H | -5.979834000 | -4.534771000 | 0.711769000  |
| H | -6.005669000 | 0.889308000  | 5.526528000  |
| H | -6.005669000 | -0.889308000 | 5.526528000  |
| H | -7.266338000 | 2.454387000  | 3.144974000  |
| H | -7.266338000 | -2.454387000 | 3.144974000  |
| H | -7.528025000 | 0.000000000  | 5.792239000  |
| H | -7.992910000 | 1.574974000  | 1.778523000  |
| H | -7.992910000 | -1.574974000 | 1.778523000  |
| H | -8.818022000 | 1.608547000  | 3.358708000  |
| H | -8.818022000 | -1.608547000 | 3.358708000  |
| N | 1.336497000  | 1.336112000  | 0.016411000  |
| N | 1.336497000  | -1.336112000 | 0.016411000  |
| N | -1.336497000 | 1.336112000  | 0.016411000  |
| N | -1.336497000 | -1.336112000 | 0.016411000  |

|    |              |              |              |
|----|--------------|--------------|--------------|
| Si | 0.000000000  | 6.849749000  | -3.440821000 |
| Si | 0.000000000  | -6.849749000 | -3.440821000 |
| Si | 6.907491000  | 0.000000000  | 3.381206000  |
| Si | -6.907491000 | 0.000000000  | 3.381206000  |

**75. Pd[A<sub>4</sub>Bz<sub>8</sub>]; S = 0 (saddled)**

|    |              |              |              |
|----|--------------|--------------|--------------|
| Pd | 0.000000000  | 0.000000000  | 0.008976000  |
| C  | 0.133556000  | -5.267519000 | -1.686436000 |
| C  | 0.320681000  | 2.948226000  | -0.550531000 |
| C  | 0.466513000  | -4.064514000 | -1.047207000 |
| C  | 1.156841000  | -6.122983000 | -2.081397000 |
| C  | 1.701328000  | 2.932423000  | -0.281432000 |
| C  | 1.824613000  | -3.729288000 | -0.818261000 |
| C  | 1.827780000  | -2.402105000 | -0.227479000 |
| C  | 2.400758000  | 1.826595000  | 0.246349000  |
| C  | 2.443921000  | 4.109546000  | -0.532679000 |
| C  | 2.501708000  | -5.792561000 | -1.851681000 |
| C  | 2.846960000  | -4.599338000 | -1.225386000 |
| C  | 2.849101000  | 7.736413000  | -2.181100000 |
| C  | 2.934574000  | -1.701134000 | 0.295932000  |
| C  | 2.947727000  | -0.321191000 | 0.570035000  |
| C  | 3.094198000  | 5.117210000  | -0.772065000 |
| C  | 3.726227000  | 1.824675000  | 0.840416000  |
| C  | 4.061886000  | 0.466862000  | 1.070321000  |
| C  | 4.119372000  | -2.436562000 | 0.532331000  |
| C  | 4.416717000  | 7.504622000  | 0.488261000  |
| C  | 4.591796000  | 2.848407000  | 1.253449000  |
| C  | 5.138079000  | -3.075412000 | 0.755174000  |
| C  | 5.260863000  | 0.135383000  | 1.717893000  |
| C  | 5.570218000  | 6.237664000  | -2.083405000 |
| C  | 5.781857000  | 2.504601000  | 1.886418000  |
| C  | 6.112436000  | 1.159939000  | 2.118145000  |
| C  | 6.288491000  | -5.624640000 | 1.881262000  |
| C  | 7.619043000  | -4.203507000 | -0.519497000 |
| C  | 7.695184000  | -2.879785000 | 2.283238000  |
| C  | -0.133556000 | 5.267519000  | -1.686436000 |
| C  | -0.320681000 | -2.948226000 | -0.550531000 |
| C  | -0.466513000 | 4.064514000  | -1.047207000 |
| C  | -1.156841000 | 6.122983000  | -2.081397000 |
| C  | -1.701328000 | -2.932423000 | -0.281432000 |
| C  | -1.824613000 | 3.729288000  | -0.818261000 |
| C  | -1.827780000 | 2.402105000  | -0.227479000 |
| C  | -2.400758000 | -1.826595000 | 0.246349000  |
| C  | -2.443921000 | -4.109546000 | -0.532679000 |
| C  | -2.501708000 | 5.792561000  | -1.851681000 |
| C  | -2.846960000 | 4.599338000  | -1.225386000 |
| C  | -2.849101000 | -7.736413000 | -2.181100000 |
| C  | -2.934574000 | 1.701134000  | 0.295932000  |
| C  | -2.947727000 | 0.321191000  | 0.570035000  |

|   |              |              |              |
|---|--------------|--------------|--------------|
| C | -3.094198000 | -5.117210000 | -0.772065000 |
| C | -3.726227000 | -1.824675000 | 0.840416000  |
| C | -4.061886000 | -0.466862000 | 1.070321000  |
| C | -4.119372000 | 2.436562000  | 0.532331000  |
| C | -4.416717000 | -7.504622000 | 0.488261000  |
| C | -4.591796000 | -2.848407000 | 1.253449000  |
| C | -5.138079000 | 3.075412000  | 0.755174000  |
| C | -5.260863000 | -0.135383000 | 1.717893000  |
| C | -5.570218000 | -6.237664000 | -2.083405000 |
| C | -5.781857000 | -2.504601000 | 1.886418000  |
| C | -6.112436000 | -1.159939000 | 2.118145000  |
| C | -6.288491000 | 5.624640000  | 1.881262000  |
| C | -7.619043000 | 4.203507000  | -0.519497000 |
| C | -7.695184000 | 2.879785000  | 2.283238000  |
| H | 0.899696000  | 5.520813000  | -1.889014000 |
| H | 0.907990000  | -7.054110000 | -2.588653000 |
| H | 1.917164000  | 7.945932000  | -1.636800000 |
| H | 2.589154000  | 7.230829000  | -3.122295000 |
| H | 3.287636000  | -6.471363000 | -2.180118000 |
| H | 3.325796000  | 8.696556000  | -2.429692000 |
| H | 3.503800000  | 7.726001000  | 1.058905000  |
| H | 3.888739000  | -4.342594000 | -1.069373000 |
| H | 4.333565000  | 3.890023000  | 1.097680000  |
| H | 4.954506000  | 8.448990000  | 0.313806000  |
| H | 5.055680000  | 6.857580000  | 1.106686000  |
| H | 5.336711000  | 5.723858000  | -3.026584000 |
| H | 5.513022000  | -0.897504000 | 1.924198000  |
| H | 5.664022000  | -6.222696000 | 1.201989000  |
| H | 5.733437000  | -5.493218000 | 2.820773000  |
| H | 6.144542000  | 7.147123000  | -2.316915000 |
| H | 6.208414000  | 5.571336000  | -1.485405000 |
| H | 6.457337000  | 3.291388000  | 2.219674000  |
| H | 7.021064000  | -4.803208000 | -1.220908000 |
| H | 7.040080000  | 0.912609000  | 2.632517000  |
| H | 7.141364000  | -2.706799000 | 3.217164000  |
| H | 7.205650000  | -6.193690000 | 2.096672000  |
| H | 7.830138000  | -3.235410000 | -0.995247000 |
| H | 7.908041000  | -1.903126000 | 1.825360000  |
| H | 8.574520000  | -4.723998000 | -0.352943000 |
| H | 8.654288000  | -3.355803000 | 2.537272000  |
| H | -0.899696000 | -5.520813000 | -1.889014000 |
| H | -0.907990000 | 7.054110000  | -2.588653000 |
| H | -1.917164000 | -7.945932000 | -1.636800000 |
| H | -2.589154000 | -7.230829000 | -3.122295000 |
| H | -3.287636000 | 6.471363000  | -2.180118000 |
| H | -3.325796000 | -8.696556000 | -2.429692000 |
| H | -3.503800000 | -7.726001000 | 1.058905000  |
| H | -3.888739000 | 4.342594000  | -1.069373000 |
| H | -4.333565000 | -3.890023000 | 1.097680000  |
| H | -4.954506000 | -8.448990000 | 0.313806000  |
| H | -5.055680000 | -6.857580000 | 1.106686000  |

|    |              |              |              |
|----|--------------|--------------|--------------|
| H  | -5.336711000 | -5.723858000 | -3.026584000 |
| H  | -5.513022000 | 0.897504000  | 1.924198000  |
| H  | -5.664022000 | 6.222696000  | 1.201989000  |
| H  | -5.733437000 | 5.493218000  | 2.820773000  |
| H  | -6.144542000 | -7.147123000 | -2.316915000 |
| H  | -6.208414000 | -5.571336000 | -1.485405000 |
| H  | -6.457337000 | -3.291388000 | 2.219674000  |
| H  | -7.021064000 | 4.803208000  | -1.220908000 |
| H  | -7.040080000 | -0.912609000 | 2.632517000  |
| H  | -7.141364000 | 2.706799000  | 3.217164000  |
| H  | -7.205650000 | 6.193690000  | 2.096672000  |
| H  | -7.830138000 | 3.235410000  | -0.995247000 |
| H  | -7.908041000 | 1.903126000  | 1.825360000  |
| H  | -8.574520000 | 4.723998000  | -0.352943000 |
| H  | -8.654288000 | 3.355803000  | 2.537272000  |
| N  | 0.536131000  | -1.940259000 | -0.159747000 |
| N  | 1.939409000  | 0.535119000  | 0.179132000  |
| N  | -0.536131000 | 1.940259000  | -0.159747000 |
| N  | -1.939409000 | -0.535119000 | 0.179132000  |
| Si | 3.999274000  | 6.664359000  | -1.143250000 |
| Si | 6.700616000  | -3.962675000 | 1.105208000  |
| Si | -3.999274000 | -6.664359000 | -1.143250000 |
| Si | -6.700616000 | 3.962675000  | 1.105208000  |

**76. Pd[A<sub>4</sub>Bz<sub>8</sub>]; S = 0 (ruffled)**

|    |             |              |              |
|----|-------------|--------------|--------------|
| Pd | 0.000000000 | 0.000000000  | 0.017306000  |
| C  | 0.000000000 | 3.301717000  | -0.702332000 |
| C  | 0.000000000 | 4.557088000  | -1.350903000 |
| C  | 0.000000000 | 5.611415000  | -1.971073000 |
| C  | 0.000000000 | 7.036455000  | -4.664887000 |
| C  | 0.000000000 | -3.301717000 | -0.702332000 |
| C  | 0.000000000 | -4.557088000 | -1.350903000 |
| C  | 0.000000000 | -5.611415000 | -1.971073000 |
| C  | 0.000000000 | -7.036455000 | -4.664887000 |
| C  | 1.248991000 | 2.733721000  | -0.375659000 |
| C  | 1.248991000 | -2.733721000 | -0.375659000 |
| C  | 1.554598000 | 8.142147000  | -2.210020000 |
| C  | 1.554598000 | -8.142147000 | -2.210020000 |
| C  | 2.513949000 | 3.441683000  | -0.256324000 |
| C  | 2.513949000 | -3.441683000 | -0.256324000 |
| C  | 2.735569000 | 1.249253000  | 0.405838000  |
| C  | 2.735569000 | -1.249253000 | 0.405838000  |
| C  | 2.906837000 | 4.764499000  | -0.513166000 |
| C  | 2.906837000 | -4.764499000 | -0.513166000 |
| C  | 3.305599000 | 0.000000000  | 0.728691000  |
| C  | 3.442307000 | 2.515034000  | 0.283815000  |
| C  | 3.442307000 | -2.515034000 | 0.283815000  |
| C  | 4.217573000 | 5.143525000  | -0.246163000 |
| C  | 4.217573000 | -5.143525000 | -0.246163000 |

|   |              |              |              |
|---|--------------|--------------|--------------|
| C | 4.568740000  | 0.000000000  | 1.361738000  |
| C | 4.764475000  | 2.911138000  | 0.539288000  |
| C | 4.764475000  | -2.911138000 | 0.539288000  |
| C | 5.140839000  | 4.222243000  | 0.270302000  |
| C | 5.140839000  | -4.222243000 | 0.270302000  |
| C | 5.634056000  | 0.000000000  | 1.962606000  |
| C | 7.131228000  | 0.000000000  | 4.598039000  |
| C | 8.174865000  | 1.556414000  | 2.131773000  |
| C | 8.174865000  | -1.556414000 | 2.131773000  |
| C | -1.248991000 | 2.733721000  | -0.375659000 |
| C | -1.248991000 | -2.733721000 | -0.375659000 |
| C | -1.554598000 | 8.142147000  | -2.210020000 |
| C | -1.554598000 | -8.142147000 | -2.210020000 |
| C | -2.513949000 | 3.441683000  | -0.256324000 |
| C | -2.513949000 | -3.441683000 | -0.256324000 |
| C | -2.735569000 | 1.249253000  | 0.405838000  |
| C | -2.735569000 | -1.249253000 | 0.405838000  |
| C | -2.906837000 | 4.764499000  | -0.513166000 |
| C | -2.906837000 | -4.764499000 | -0.513166000 |
| C | -3.305599000 | 0.000000000  | 0.728691000  |
| C | -3.442307000 | 2.515034000  | 0.283815000  |
| C | -3.442307000 | -2.515034000 | 0.283815000  |
| C | -4.217573000 | 5.143525000  | -0.246163000 |
| C | -4.217573000 | -5.143525000 | -0.246163000 |
| C | -4.568740000 | 0.000000000  | 1.361738000  |
| C | -4.764475000 | 2.911138000  | 0.539288000  |
| C | -4.764475000 | -2.911138000 | 0.539288000  |
| C | -5.140839000 | 4.222243000  | 0.270302000  |
| C | -5.140839000 | -4.222243000 | 0.270302000  |
| C | -5.634056000 | 0.000000000  | 1.962606000  |
| C | -7.131228000 | 0.000000000  | 4.598039000  |
| C | -8.174865000 | 1.556414000  | 2.131773000  |
| C | -8.174865000 | -1.556414000 | 2.131773000  |
| H | 0.000000000  | 5.972228000  | -4.936587000 |
| H | 0.000000000  | -5.972228000 | -4.936587000 |
| H | 0.890077000  | 7.501254000  | -5.113197000 |
| H | 0.890077000  | -7.501254000 | -5.113197000 |
| H | 1.569929000  | 8.240073000  | -1.115261000 |
| H | 1.569929000  | -8.240073000 | -1.115261000 |
| H | 1.612925000  | 9.149748000  | -2.648792000 |
| H | 1.612925000  | -9.149748000 | -2.648792000 |
| H | 2.204662000  | 5.482402000  | -0.918132000 |
| H | 2.204662000  | -5.482402000 | -0.918132000 |
| H | 2.451979000  | 7.585395000  | -2.516941000 |
| H | 2.451979000  | -7.585395000 | -2.516941000 |
| H | 4.528050000  | 6.168362000  | -0.444769000 |
| H | 4.528050000  | -6.168362000 | -0.444769000 |
| H | 5.483937000  | 2.211198000  | 0.944869000  |
| H | 5.483937000  | -2.211198000 | 0.944869000  |
| H | 6.165316000  | 4.534679000  | 0.467820000  |
| H | 6.165316000  | -4.534679000 | 0.467820000  |

|    |              |              |              |
|----|--------------|--------------|--------------|
| H  | 6.583506000  | 0.889314000  | 4.940820000  |
| H  | 6.583506000  | -0.889314000 | 4.940820000  |
| H  | 7.627707000  | 2.453990000  | 2.454385000  |
| H  | 7.627707000  | -2.453990000 | 2.454385000  |
| H  | 8.123327000  | 0.000000000  | 5.074895000  |
| H  | 8.242433000  | 1.573613000  | 1.034722000  |
| H  | 8.242433000  | -1.573613000 | 1.034722000  |
| H  | 9.194616000  | 1.613645000  | 2.541267000  |
| H  | 9.194616000  | -1.613645000 | 2.541267000  |
| H  | -0.890077000 | 7.501254000  | -5.113197000 |
| H  | -0.890077000 | -7.501254000 | -5.113197000 |
| H  | -1.569929000 | 8.240073000  | -1.115261000 |
| H  | -1.569929000 | -8.240073000 | -1.115261000 |
| H  | -1.612925000 | 9.149748000  | -2.648792000 |
| H  | -1.612925000 | -9.149748000 | -2.648792000 |
| H  | -2.204662000 | 5.482402000  | -0.918132000 |
| H  | -2.204662000 | -5.482402000 | -0.918132000 |
| H  | -2.451979000 | 7.585395000  | -2.516941000 |
| H  | -2.451979000 | -7.585395000 | -2.516941000 |
| H  | -4.528050000 | 6.168362000  | -0.444769000 |
| H  | -4.528050000 | -6.168362000 | -0.444769000 |
| H  | -5.483937000 | 2.211198000  | 0.944869000  |
| H  | -5.483937000 | -2.211198000 | 0.944869000  |
| H  | -6.165316000 | 4.534679000  | 0.467820000  |
| H  | -6.165316000 | -4.534679000 | 0.467820000  |
| H  | -6.583506000 | 0.889314000  | 4.940820000  |
| H  | -6.583506000 | -0.889314000 | 4.940820000  |
| H  | -7.627707000 | 2.453990000  | 2.454385000  |
| H  | -7.627707000 | -2.453990000 | 2.454385000  |
| H  | -8.123327000 | 0.000000000  | 5.074895000  |
| H  | -8.242433000 | 1.573613000  | 1.034722000  |
| H  | -8.242433000 | -1.573613000 | 1.034722000  |
| H  | -9.194616000 | 1.613645000  | 2.541267000  |
| H  | -9.194616000 | -1.613645000 | 2.541267000  |
| N  | 1.429470000  | 1.428906000  | 0.016777000  |
| N  | 1.429470000  | -1.428906000 | 0.016777000  |
| N  | -1.429470000 | 1.428906000  | 0.016777000  |
| N  | -1.429470000 | -1.428906000 | 0.016777000  |
| Si | 0.000000000  | 7.249296000  | -2.787366000 |
| Si | 0.000000000  | -7.249296000 | -2.787366000 |
| Si | 7.296776000  | 0.000000000  | 2.726527000  |
| Si | -7.296776000 | 0.000000000  | 2.726527000  |

**77. Pt[A<sub>4</sub>Bz<sub>8</sub>]; S = 0 (saddled)**

|    |             |              |              |
|----|-------------|--------------|--------------|
| Pt | 0.000000000 | 0.000000000  | 0.005780000  |
| C  | 0.134074000 | -5.285573000 | -1.651934000 |
| C  | 0.322610000 | 2.954295000  | -0.548032000 |
| C  | 0.465701000 | -4.075445000 | -1.025331000 |
| C  | 1.156805000 | -6.148973000 | -2.029938000 |

|   |              |              |              |
|---|--------------|--------------|--------------|
| C | 1.704828000  | 2.933604000  | -0.289090000 |
| C | 1.822732000  | -3.740832000 | -0.792754000 |
| C | 1.828304000  | -2.408579000 | -0.219075000 |
| C | 2.407475000  | 1.827391000  | 0.232430000  |
| C | 2.447249000  | 4.111126000  | -0.543251000 |
| C | 2.500934000  | -5.819178000 | -1.796115000 |
| C | 2.840892000  | 7.740381000  | -2.188552000 |
| C | 2.844847000  | -4.618986000 | -1.183074000 |
| C | 2.935289000  | -1.704443000 | 0.298599000  |
| C | 2.953356000  | -0.322954000 | 0.562293000  |
| C | 3.095539000  | 5.119626000  | -0.783970000 |
| C | 3.737865000  | 1.822699000  | 0.810191000  |
| C | 4.072223000  | 0.465859000  | 1.044170000  |
| C | 4.120021000  | -2.440226000 | 0.538745000  |
| C | 4.408878000  | 7.510379000  | 0.479897000  |
| C | 4.611944000  | 2.845791000  | 1.206926000  |
| C | 5.138689000  | -3.078151000 | 0.763894000  |
| C | 5.277658000  | 0.135187000  | 1.680257000  |
| C | 5.567936000  | 6.250448000  | -2.092667000 |
| C | 5.808253000  | 2.502820000  | 1.828065000  |
| C | 6.137257000  | 1.158833000  | 2.064498000  |
| C | 6.291458000  | -5.624434000 | 1.892469000  |
| C | 7.623126000  | -4.202695000 | -0.507687000 |
| C | 7.694770000  | -2.876889000 | 2.293247000  |
| C | -0.134074000 | 5.285573000  | -1.651934000 |
| C | -0.322610000 | -2.954295000 | -0.548032000 |
| C | -0.465701000 | 4.075445000  | -1.025331000 |
| C | -1.156805000 | 6.148973000  | -2.029938000 |
| C | -1.704828000 | -2.933604000 | -0.289090000 |
| C | -1.822732000 | 3.740832000  | -0.792754000 |
| C | -1.828304000 | 2.408579000  | -0.219075000 |
| C | -2.407475000 | -1.827391000 | 0.232430000  |
| C | -2.447249000 | -4.111126000 | -0.543251000 |
| C | -2.500934000 | 5.819178000  | -1.796115000 |
| C | -2.840892000 | -7.740381000 | -2.188552000 |
| C | -2.844847000 | 4.618986000  | -1.183074000 |
| C | -2.935289000 | 1.704443000  | 0.298599000  |
| C | -2.953356000 | 0.322954000  | 0.562293000  |
| C | -3.095539000 | -5.119626000 | -0.783970000 |
| C | -3.737865000 | -1.822699000 | 0.810191000  |
| C | -4.072223000 | -0.465859000 | 1.044170000  |
| C | -4.120021000 | 2.440226000  | 0.538745000  |
| C | -4.408878000 | -7.510379000 | 0.479897000  |
| C | -4.611944000 | -2.845791000 | 1.206926000  |
| C | -5.138689000 | 3.078151000  | 0.763894000  |
| C | -5.277658000 | -0.135187000 | 1.680257000  |
| C | -5.567936000 | -6.250448000 | -2.092667000 |
| C | -5.808253000 | -2.502820000 | 1.828065000  |
| C | -6.137257000 | -1.158833000 | 2.064498000  |
| C | -6.291458000 | 5.624434000  | 1.892469000  |
| C | -7.623126000 | 4.202695000  | -0.507687000 |

|   |              |              |              |
|---|--------------|--------------|--------------|
| C | -7.694770000 | 2.876889000  | 2.293247000  |
| H | 0.898245000  | 5.537792000  | -1.858834000 |
| H | 0.908085000  | -7.085315000 | -2.527571000 |
| H | 1.909609000  | 7.947894000  | -1.642311000 |
| H | 2.580109000  | 7.234646000  | -3.129424000 |
| H | 3.287438000  | -6.503594000 | -2.111114000 |
| H | 3.315016000  | 8.701696000  | -2.437469000 |
| H | 3.494870000  | 7.728068000  | 1.050205000  |
| H | 3.886078000  | -4.362609000 | -1.024668000 |
| H | 4.354817000  | 3.886972000  | 1.048504000  |
| H | 4.943514000  | 8.456767000  | 0.306662000  |
| H | 5.049564000  | 6.864902000  | 1.098167000  |
| H | 5.336925000  | 5.738160000  | -3.037251000 |
| H | 5.528053000  | -0.896871000 | 1.891208000  |
| H | 5.668814000  | -6.223669000 | 1.212541000  |
| H | 5.734671000  | -5.493063000 | 2.830934000  |
| H | 6.140069000  | 7.161991000  | -2.323355000 |
| H | 6.207331000  | 5.584508000  | -1.495468000 |
| H | 6.489432000  | 3.289865000  | 2.148701000  |
| H | 7.026525000  | -4.802278000 | -1.210334000 |
| H | 7.069491000  | 0.911319000  | 2.570404000  |
| H | 7.139506000  | -2.701679000 | 3.225862000  |
| H | 7.208948000  | -6.192235000 | 2.109665000  |
| H | 7.834541000  | -3.234305000 | -0.982704000 |
| H | 7.908470000  | -1.901329000 | 1.833397000  |
| H | 8.578621000  | -4.722752000 | -0.339826000 |
| H | 8.653670000  | -3.352049000 | 2.549653000  |
| H | -0.898245000 | -5.537792000 | -1.858834000 |
| H | -0.908085000 | 7.085315000  | -2.527571000 |
| H | -1.909609000 | -7.947894000 | -1.642311000 |
| H | -2.580109000 | -7.234646000 | -3.129424000 |
| H | -3.287438000 | 6.503594000  | -2.111114000 |
| H | -3.315016000 | -8.701696000 | -2.437469000 |
| H | -3.494870000 | -7.728068000 | 1.050205000  |
| H | -3.886078000 | 4.362609000  | -1.024668000 |
| H | -4.354817000 | -3.886972000 | 1.048504000  |
| H | -4.943514000 | -8.456767000 | 0.306662000  |
| H | -5.049564000 | -6.864902000 | 1.098167000  |
| H | -5.336925000 | -5.738160000 | -3.037251000 |
| H | -5.528053000 | 0.896871000  | 1.891208000  |
| H | -5.668814000 | 6.223669000  | 1.212541000  |
| H | -5.734671000 | 5.493063000  | 2.830934000  |
| H | -6.140069000 | -7.161991000 | -2.323355000 |
| H | -6.207331000 | -5.584508000 | -1.495468000 |
| H | -6.489432000 | -3.289865000 | 2.148701000  |
| H | -7.026525000 | 4.802278000  | -1.210334000 |
| H | -7.069491000 | -0.911319000 | 2.570404000  |
| H | -7.139506000 | 2.701679000  | 3.225862000  |
| H | -7.208948000 | 6.192235000  | 2.109665000  |
| H | -7.834541000 | 3.234305000  | -0.982704000 |
| H | -7.908470000 | 1.901329000  | 1.833397000  |



|    |              |              |              |
|----|--------------|--------------|--------------|
| H  | -8.578621000 | 4.722752000  | -0.339826000 |
| H  | -8.653670000 | 3.352049000  | 2.549653000  |
| N  | 0.535513000  | -1.938807000 | -0.168382000 |
| N  | 1.938053000  | 0.534836000  | 0.181682000  |
| N  | -0.535513000 | 1.938807000  | -0.168382000 |
| N  | -1.938053000 | -0.534836000 | 0.181682000  |
| Si | 3.995166000  | 6.670683000  | -1.152774000 |
| Si | 6.702534000  | -3.962583000 | 1.115821000  |
| Si | -3.995166000 | -6.670683000 | -1.152774000 |
| Si | -6.702534000 | 3.962583000  | 1.115821000  |

**78. Pt[A<sub>4</sub>Bz<sub>8</sub>]; S = 0 (ruffled)**

|    |              |              |              |
|----|--------------|--------------|--------------|
| Pt | 0.000000000  | 0.000000000  | 0.015130000  |
| C  | 0.000000000  | 3.305804000  | -0.699144000 |
| C  | 0.000000000  | 4.562152000  | -1.346691000 |
| C  | 0.000000000  | 5.616715000  | -1.966430000 |
| C  | 0.000000000  | 7.045170000  | -4.658627000 |
| C  | 0.000000000  | -3.305804000 | -0.699144000 |
| C  | 0.000000000  | -4.562152000 | -1.346691000 |
| C  | 0.000000000  | -5.616715000 | -1.966430000 |
| C  | 0.000000000  | -7.045170000 | -4.658627000 |
| C  | 1.248971000  | 2.737635000  | -0.373747000 |
| C  | 1.248971000  | -2.737635000 | -0.373747000 |
| C  | 1.554738000  | 8.147203000  | -2.201999000 |
| C  | 1.554738000  | -8.147203000 | -2.201999000 |
| C  | 2.512925000  | 3.442241000  | -0.254311000 |
| C  | 2.512925000  | -3.442241000 | -0.254311000 |
| C  | 2.739018000  | 1.249261000  | 0.400533000  |
| C  | 2.739018000  | -1.249261000 | 0.400533000  |
| C  | 2.905126000  | 4.765975000  | -0.507211000 |
| C  | 2.905126000  | -4.765975000 | -0.507211000 |
| C  | 3.308858000  | 0.000000000  | 0.722501000  |
| C  | 3.442673000  | 2.513852000  | 0.278807000  |
| C  | 3.442673000  | -2.513852000 | 0.278807000  |
| C  | 4.216771000  | 5.144017000  | -0.244010000 |
| C  | 4.216771000  | -5.144017000 | -0.244010000 |
| C  | 4.572035000  | 0.000000000  | 1.356333000  |
| C  | 4.765906000  | 2.908704000  | 0.530423000  |
| C  | 4.765906000  | -2.908704000 | 0.530423000  |
| C  | 5.141899000  | 4.220501000  | 0.265050000  |
| C  | 5.141899000  | -4.220501000 | 0.265050000  |
| C  | 5.636423000  | 0.000000000  | 1.958858000  |
| C  | 7.128107000  | 0.000000000  | 4.596956000  |
| C  | 8.176484000  | 1.556731000  | 2.132999000  |
| C  | 8.176484000  | -1.556731000 | 2.132999000  |
| C  | -1.248971000 | 2.737635000  | -0.373747000 |
| C  | -1.248971000 | -2.737635000 | -0.373747000 |
| C  | -1.554738000 | 8.147203000  | -2.201999000 |
| C  | -1.554738000 | -8.147203000 | -2.201999000 |

|   |              |              |              |
|---|--------------|--------------|--------------|
| C | -2.512925000 | 3.442241000  | -0.254311000 |
| C | -2.512925000 | -3.442241000 | -0.254311000 |
| C | -2.739018000 | 1.249261000  | 0.400533000  |
| C | -2.739018000 | -1.249261000 | 0.400533000  |
| C | -2.905126000 | 4.765975000  | -0.507211000 |
| C | -2.905126000 | -4.765975000 | -0.507211000 |
| C | -3.308858000 | 0.000000000  | 0.722501000  |
| C | -3.442673000 | 2.513852000  | 0.278807000  |
| C | -3.442673000 | -2.513852000 | 0.278807000  |
| C | -4.216771000 | 5.144017000  | -0.244010000 |
| C | -4.216771000 | -5.144017000 | -0.244010000 |
| C | -4.572035000 | 0.000000000  | 1.356333000  |
| C | -4.765906000 | 2.908704000  | 0.530423000  |
| C | -4.765906000 | -2.908704000 | 0.530423000  |
| C | -5.141899000 | 4.220501000  | 0.265050000  |
| C | -5.141899000 | -4.220501000 | 0.265050000  |
| C | -5.636423000 | 0.000000000  | 1.958858000  |
| C | -7.128107000 | 0.000000000  | 4.596956000  |
| C | -8.176484000 | 1.556731000  | 2.132999000  |
| C | -8.176484000 | -1.556731000 | 2.132999000  |
| H | 0.000000000  | 5.981272000  | -4.931643000 |
| H | 0.000000000  | -5.981272000 | -4.931643000 |
| H | 0.890088000  | 7.510524000  | -5.106307000 |
| H | 0.890088000  | -7.510524000 | -5.106307000 |
| H | 1.569817000  | 8.243399000  | -1.107085000 |
| H | 1.569817000  | -8.243399000 | -1.107085000 |
| H | 1.613593000  | 9.155438000  | -2.639178000 |
| H | 1.613593000  | -9.155438000 | -2.639178000 |
| H | 2.201298000  | 5.485224000  | -0.906657000 |
| H | 2.201298000  | -5.485224000 | -0.906657000 |
| H | 2.451932000  | 7.590488000  | -2.509526000 |
| H | 2.451932000  | -7.590488000 | -2.509526000 |
| H | 4.526351000  | 6.169598000  | -0.439896000 |
| H | 4.526351000  | -6.169598000 | -0.439896000 |
| H | 5.486512000  | 2.206756000  | 0.930287000  |
| H | 5.486512000  | -2.206756000 | 0.930287000  |
| H | 6.167334000  | 4.531539000  | 0.459518000  |
| H | 6.167334000  | -4.531539000 | 0.459518000  |
| H | 6.579629000  | 0.889316000  | 4.938466000  |
| H | 6.579629000  | -0.889316000 | 4.938466000  |
| H | 7.627955000  | 2.453828000  | 2.454555000  |
| H | 7.627955000  | -2.453828000 | 2.454555000  |
| H | 8.119120000  | 0.000000000  | 5.076053000  |
| H | 8.246639000  | 1.574119000  | 1.036146000  |
| H | 8.246639000  | -1.574119000 | 1.036146000  |
| H | 9.195235000  | 1.614543000  | 2.544841000  |
| H | 9.195235000  | -1.614543000 | 2.544841000  |
| H | -0.890088000 | 7.510524000  | -5.106307000 |
| H | -0.890088000 | -7.510524000 | -5.106307000 |
| H | -1.569817000 | 8.243399000  | -1.107085000 |
| H | -1.569817000 | -8.243399000 | -1.107085000 |

|    |              |              |              |
|----|--------------|--------------|--------------|
| H  | -1.613593000 | 9.155438000  | -2.639178000 |
| H  | -1.613593000 | -9.155438000 | -2.639178000 |
| H  | -2.201298000 | 5.485224000  | -0.906657000 |
| H  | -2.201298000 | -5.485224000 | -0.906657000 |
| H  | -2.451932000 | 7.590488000  | -2.509526000 |
| H  | -2.451932000 | -7.590488000 | -2.509526000 |
| H  | -4.526351000 | 6.169598000  | -0.439896000 |
| H  | -4.526351000 | -6.169598000 | -0.439896000 |
| H  | -5.486512000 | 2.206756000  | 0.930287000  |
| H  | -5.486512000 | -2.206756000 | 0.930287000  |
| H  | -6.167334000 | 4.531539000  | 0.459518000  |
| H  | -6.167334000 | -4.531539000 | 0.459518000  |
| H  | -6.579629000 | 0.889316000  | 4.938466000  |
| H  | -6.579629000 | -0.889316000 | 4.938466000  |
| H  | -7.627955000 | 2.453828000  | 2.454555000  |
| H  | -7.627955000 | -2.453828000 | 2.454555000  |
| H  | -8.119120000 | 0.000000000  | 5.076053000  |
| H  | -8.246639000 | 1.574119000  | 1.036146000  |
| H  | -8.246639000 | -1.574119000 | 1.036146000  |
| H  | -9.195235000 | 1.614543000  | 2.544841000  |
| H  | -9.195235000 | -1.614543000 | 2.544841000  |
| N  | 1.429147000  | 1.428786000  | 0.014696000  |
| N  | 1.429147000  | -1.428786000 | 0.014696000  |
| N  | -1.429147000 | 1.428786000  | 0.014696000  |
| N  | -1.429147000 | -1.428786000 | 0.014696000  |
| Si | 0.000000000  | 7.255599000  | -2.780842000 |
| Si | 0.000000000  | -7.255599000 | -2.780842000 |
| Si | 7.297733000  | 0.000000000  | 2.725838000  |
| Si | -7.297733000 | 0.000000000  | 2.725838000  |

**79. Zn[A<sub>4</sub>Bz<sub>8</sub>]; S = 0 (saddled)**

|    |             |              |              |
|----|-------------|--------------|--------------|
| Zn | 0.000000000 | 0.000000000  | 0.010375000  |
| C  | 0.025556000 | -5.346251000 | -1.550884000 |
| C  | 0.349518000 | 2.982804000  | -0.469585000 |
| C  | 0.399846000 | -4.118722000 | -0.983906000 |
| C  | 1.017037000 | -6.209347000 | -2.003695000 |
| C  | 1.720172000 | 2.945823000  | -0.118907000 |
| C  | 1.771618000 | -3.768196000 | -0.883762000 |
| C  | 1.810000000 | -2.424531000 | -0.329081000 |
| C  | 2.374116000 | -5.863089000 | -1.903590000 |
| C  | 2.422025000 | 1.808789000  | 0.353292000  |
| C  | 2.456469000 | 4.147195000  | -0.246489000 |
| C  | 2.761150000 | -4.647794000 | -1.349469000 |
| C  | 2.860070000 | 7.896704000  | -1.597201000 |
| C  | 2.947101000 | -1.719874000 | 0.138176000  |
| C  | 2.980361000 | -0.350470000 | 0.494958000  |
| C  | 3.095373000 | 5.182444000  | -0.375661000 |
| C  | 3.763649000 | 1.770633000  | 0.912516000  |
| C  | 4.113730000 | 0.398996000  | 1.014483000  |

|   |              |              |              |
|---|--------------|--------------|--------------|
| C | 4.156550000  | -2.445954000 | 0.247391000  |
| C | 4.327281000  | 7.492023000  | 1.108309000  |
| C | 4.639294000  | 2.760419000  | 1.385054000  |
| C | 5.203086000  | -3.070225000 | 0.355596000  |
| C | 5.336171000  | 0.024436000  | 1.592260000  |
| C | 5.598690000  | 6.433033000  | -1.500411000 |
| C | 5.850429000  | 2.373343000  | 1.948111000  |
| C | 6.195609000  | 1.016082000  | 2.051606000  |
| C | 6.480450000  | -5.636035000 | 1.285647000  |
| C | 7.603358000  | -4.096225000 | -1.146647000 |
| C | 7.866165000  | -2.882340000 | 1.693854000  |
| C | -0.025556000 | 5.346251000  | -1.550884000 |
| C | -0.349518000 | -2.982804000 | -0.469585000 |
| C | -0.399846000 | 4.118722000  | -0.983906000 |
| C | -1.017037000 | 6.209347000  | -2.003695000 |
| C | -1.720172000 | -2.945823000 | -0.118907000 |
| C | -1.771618000 | 3.768196000  | -0.883762000 |
| C | -1.810000000 | 2.424531000  | -0.329081000 |
| C | -2.374116000 | 5.863089000  | -1.903590000 |
| C | -2.422025000 | -1.808789000 | 0.353292000  |
| C | -2.456469000 | -4.147195000 | -0.246489000 |
| C | -2.761150000 | 4.647794000  | -1.349469000 |
| C | -2.860070000 | -7.896704000 | -1.597201000 |
| C | -2.947101000 | 1.719874000  | 0.138176000  |
| C | -2.980361000 | 0.350470000  | 0.494958000  |
| C | -3.095373000 | -5.182444000 | -0.375661000 |
| C | -3.763649000 | -1.770633000 | 0.912516000  |
| C | -4.113730000 | -0.398996000 | 1.014483000  |
| C | -4.156550000 | 2.445954000  | 0.247391000  |
| C | -4.327281000 | -7.492023000 | 1.108309000  |
| C | -4.639294000 | -2.760419000 | 1.385054000  |
| C | -5.203086000 | 3.070225000  | 0.355596000  |
| C | -5.336171000 | -0.024436000 | 1.592260000  |
| C | -5.598690000 | -6.433033000 | -1.500411000 |
| C | -5.850429000 | -2.373343000 | 1.948111000  |
| C | -6.195609000 | -1.016082000 | 2.051606000  |
| C | -6.480450000 | 5.636035000  | 1.285647000  |
| C | -7.603358000 | 4.096225000  | -1.146647000 |
| C | -7.866165000 | 2.882340000  | 1.693854000  |
| H | 0.732922000  | -7.159252000 | -2.454591000 |
| H | 1.018900000  | 5.612765000  | -1.653473000 |
| H | 1.898455000  | 8.042136000  | -1.084606000 |
| H | 2.657187000  | 7.465432000  | -2.588161000 |
| H | 3.134534000  | -6.547662000 | -2.277225000 |
| H | 3.325457000  | 8.883104000  | -1.743426000 |
| H | 3.390335000  | 7.659323000  | 1.657994000  |
| H | 3.809958000  | -4.379482000 | -1.294711000 |
| H | 4.370479000  | 3.809231000  | 1.329854000  |
| H | 4.856020000  | 8.453610000  | 1.022762000  |
| H | 4.952862000  | 6.810532000  | 1.702981000  |
| H | 5.409543000  | 5.988794000  | -2.487827000 |

|    |              |              |              |
|----|--------------|--------------|--------------|
| H  | 5.600604000  | -1.020218000 | 1.699525000  |
| H  | 5.815754000  | -6.219364000 | 0.632189000  |
| H  | 5.996675000  | -5.552471000 | 2.269032000  |
| H  | 6.166768000  | 7.365013000  | -1.642456000 |
| H  | 6.224328000  | 5.731739000  | -0.929723000 |
| H  | 6.531900000  | 3.133619000  | 2.327603000  |
| H  | 6.964275000  | -4.678328000 | -1.826330000 |
| H  | 7.141172000  | 0.732287000  | 2.511789000  |
| H  | 7.388710000  | -2.769287000 | 2.677831000  |
| H  | 7.420721000  | -6.194949000 | 1.407682000  |
| H  | 7.764514000  | -3.106663000 | -1.597110000 |
| H  | 8.015768000  | -1.879450000 | 1.268843000  |
| H  | 8.576104000  | -4.605833000 | -1.071329000 |
| H  | 8.854360000  | -3.342632000 | 1.844209000  |
| H  | -0.732922000 | 7.159252000  | -2.454591000 |
| H  | -1.018900000 | -5.612765000 | -1.653473000 |
| H  | -1.898455000 | -8.042136000 | -1.084606000 |
| H  | -2.657187000 | -7.465432000 | -2.588161000 |
| H  | -3.134534000 | 6.547662000  | -2.277225000 |
| H  | -3.325457000 | -8.883104000 | -1.743426000 |
| H  | -3.390335000 | -7.659323000 | 1.657994000  |
| H  | -3.809958000 | 4.379482000  | -1.294711000 |
| H  | -4.370479000 | -3.809231000 | 1.329854000  |
| H  | -4.856020000 | -8.453610000 | 1.022762000  |
| H  | -4.952862000 | -6.810532000 | 1.702981000  |
| H  | -5.409543000 | -5.988794000 | -2.487827000 |
| H  | -5.600604000 | 1.020218000  | 1.699525000  |
| H  | -5.815754000 | 6.219364000  | 0.632189000  |
| H  | -5.996675000 | 5.552471000  | 2.269032000  |
| H  | -6.166768000 | -7.365013000 | -1.642456000 |
| H  | -6.224328000 | -5.731739000 | -0.929723000 |
| H  | -6.531900000 | -3.133619000 | 2.327603000  |
| H  | -6.964275000 | 4.678328000  | -1.826330000 |
| H  | -7.141172000 | -0.732287000 | 2.511789000  |
| H  | -7.388710000 | 2.769287000  | 2.677831000  |
| H  | -7.420721000 | 6.194949000  | 1.407682000  |
| H  | -7.764514000 | 3.106663000  | -1.597110000 |
| H  | -8.015768000 | 1.879450000  | 1.268843000  |
| H  | -8.576104000 | 4.605833000  | -1.071329000 |
| H  | -8.854360000 | 3.342632000  | 1.844209000  |
| N  | 0.525853000  | -1.961654000 | -0.184861000 |
| N  | 1.959360000  | 0.524725000  | 0.208785000  |
| N  | -0.525853000 | 1.961654000  | -0.184861000 |
| N  | -1.959360000 | -0.524725000 | 0.208785000  |
| Si | 3.985379000  | 6.766202000  | -0.594123000 |
| Si | 6.803437000  | -3.936343000 | 0.549102000  |
| Si | -3.985379000 | -6.766202000 | -0.594123000 |
| Si | -6.803437000 | 3.936343000  | 0.549102000  |

**80. Zn[A<sub>4</sub>Bz<sub>8</sub>]; S = 0 (ruffled)**

|    |              |              |              |
|----|--------------|--------------|--------------|
| Zn | 0.000000000  | 0.000000000  | 0.014209000  |
| C  | 0.000000000  | 3.362061000  | -0.563928000 |
| C  | 0.000000000  | 4.651776000  | -1.144363000 |
| C  | 0.000000000  | 5.735107000  | -1.712931000 |
| C  | 0.000000000  | 7.278609000  | -4.340752000 |
| C  | 0.000000000  | -3.362061000 | -0.563928000 |
| C  | 0.000000000  | -4.651776000 | -1.144363000 |
| C  | 0.000000000  | -5.735107000 | -1.712931000 |
| C  | 0.000000000  | -7.278609000 | -4.340752000 |
| C  | 1.261387000  | 2.781062000  | -0.289831000 |
| C  | 1.261387000  | -2.781062000 | -0.289831000 |
| C  | 1.554750000  | 8.274734000  | -1.840433000 |
| C  | 1.554750000  | -8.274734000 | -1.840433000 |
| C  | 2.529183000  | 3.489570000  | -0.192645000 |
| C  | 2.529183000  | -3.489570000 | -0.192645000 |
| C  | 2.782471000  | 1.261648000  | 0.317273000  |
| C  | 2.782471000  | -1.261648000 | 0.317273000  |
| C  | 2.907237000  | 4.830343000  | -0.373735000 |
| C  | 2.907237000  | -4.830343000 | -0.373735000 |
| C  | 3.365061000  | 0.000000000  | 0.587454000  |
| C  | 3.489380000  | 2.530790000  | 0.220445000  |
| C  | 3.489380000  | -2.530790000 | 0.220445000  |
| C  | 4.232735000  | 5.194460000  | -0.171437000 |
| C  | 4.232735000  | -5.194460000 | -0.171437000 |
| C  | 4.661116000  | 0.000000000  | 1.153227000  |
| C  | 4.828816000  | 2.912612000  | 0.403855000  |
| C  | 4.828816000  | -2.912612000 | 0.403855000  |
| C  | 5.189746000  | 4.239212000  | 0.203112000  |
| C  | 5.189746000  | -4.239212000 | 0.203112000  |
| C  | 5.753741000  | 0.000000000  | 1.703477000  |
| C  | 7.363062000  | 0.000000000  | 4.271585000  |
| C  | 8.300616000  | 1.556620000  | 1.764355000  |
| C  | 8.300616000  | -1.556620000 | 1.764355000  |
| C  | -1.261387000 | 2.781062000  | -0.289831000 |
| C  | -1.261387000 | -2.781062000 | -0.289831000 |
| C  | -1.554750000 | 8.274734000  | -1.840433000 |
| C  | -1.554750000 | -8.274734000 | -1.840433000 |
| C  | -2.529183000 | 3.489570000  | -0.192645000 |
| C  | -2.529183000 | -3.489570000 | -0.192645000 |
| C  | -2.782471000 | 1.261648000  | 0.317273000  |
| C  | -2.782471000 | -1.261648000 | 0.317273000  |
| C  | -2.907237000 | 4.830343000  | -0.373735000 |
| C  | -2.907237000 | -4.830343000 | -0.373735000 |
| C  | -3.365061000 | 0.000000000  | 0.587454000  |
| C  | -3.489380000 | 2.530790000  | 0.220445000  |
| C  | -3.489380000 | -2.530790000 | 0.220445000  |
| C  | -4.232735000 | 5.194460000  | -0.171437000 |
| C  | -4.232735000 | -5.194460000 | -0.171437000 |
| C  | -4.661116000 | 0.000000000  | 1.153227000  |

|   |              |              |              |
|---|--------------|--------------|--------------|
| C | -4.828816000 | 2.912612000  | 0.403855000  |
| C | -4.828816000 | -2.912612000 | 0.403855000  |
| C | -5.189746000 | 4.239212000  | 0.203112000  |
| C | -5.189746000 | -4.239212000 | 0.203112000  |
| C | -5.753741000 | 0.000000000  | 1.703477000  |
| C | -7.363062000 | 0.000000000  | 4.271585000  |
| C | -8.300616000 | 1.556620000  | 1.764355000  |
| C | -8.300616000 | -1.556620000 | 1.764355000  |
| H | 0.000000000  | 6.227585000  | -4.659659000 |
| H | 0.000000000  | -6.227585000 | -4.659659000 |
| H | 0.890108000  | 7.762998000  | -4.767776000 |
| H | 0.890108000  | -7.762998000 | -4.767776000 |
| H | 1.570372000  | 8.326877000  | -0.742519000 |
| H | 1.570372000  | -8.326877000 | -0.742519000 |
| H | 1.613612000  | 9.299815000  | -2.236565000 |
| H | 1.613612000  | -9.299815000 | -2.236565000 |
| H | 2.180035000  | 5.575243000  | -0.670179000 |
| H | 2.180035000  | -5.575243000 | -0.670179000 |
| H | 2.451768000  | 7.730708000  | -2.170408000 |
| H | 2.451768000  | -7.730708000 | -2.170408000 |
| H | 4.528681000  | 6.233367000  | -0.310577000 |
| H | 4.528681000  | -6.233367000 | -0.310577000 |
| H | 5.575127000  | 2.187472000  | 0.701088000  |
| H | 5.575127000  | -2.187472000 | 0.701088000  |
| H | 6.227765000  | 4.537541000  | 0.344046000  |
| H | 6.227765000  | -4.537541000 | 0.344046000  |
| H | 6.830575000  | 0.889334000  | 4.637520000  |
| H | 6.830575000  | -0.889334000 | 4.637520000  |
| H | 7.767730000  | 2.453957000  | 2.110694000  |
| H | 7.767730000  | -2.453957000 | 2.110694000  |
| H | 8.322303000  | 1.575338000  | 0.665465000  |
| H | 8.322303000  | -1.575338000 | 0.665465000  |
| H | 8.374823000  | 0.000000000  | 4.705195000  |
| H | 9.336682000  | 1.613028000  | 2.130741000  |
| H | 9.336682000  | -1.613028000 | 2.130741000  |
| H | -0.890108000 | 7.762998000  | -4.767776000 |
| H | -0.890108000 | -7.762998000 | -4.767776000 |
| H | -1.570372000 | 8.326877000  | -0.742519000 |
| H | -1.570372000 | -8.326877000 | -0.742519000 |
| H | -1.613612000 | 9.299815000  | -2.236565000 |
| H | -1.613612000 | -9.299815000 | -2.236565000 |
| H | -2.180035000 | 5.575243000  | -0.670179000 |
| H | -2.180035000 | -5.575243000 | -0.670179000 |
| H | -2.451768000 | 7.730708000  | -2.170408000 |
| H | -2.451768000 | -7.730708000 | -2.170408000 |
| H | -4.528681000 | 6.233367000  | -0.310577000 |
| H | -4.528681000 | -6.233367000 | -0.310577000 |
| H | -5.575127000 | 2.187472000  | 0.701088000  |
| H | -5.575127000 | -2.187472000 | 0.701088000  |
| H | -6.227765000 | 4.537541000  | 0.344046000  |
| H | -6.227765000 | -4.537541000 | 0.344046000  |

|    |              |              |              |
|----|--------------|--------------|--------------|
| H  | -6.830575000 | 0.889334000  | 4.637520000  |
| H  | -6.830575000 | -0.889334000 | 4.637520000  |
| H  | -7.767730000 | 2.453957000  | 2.110694000  |
| H  | -7.767730000 | -2.453957000 | 2.110694000  |
| H  | -8.322303000 | 1.575338000  | 0.665465000  |
| H  | -8.322303000 | -1.575338000 | 0.665465000  |
| H  | -8.374823000 | 0.000000000  | 4.705195000  |
| H  | -9.336682000 | 1.613028000  | 2.130741000  |
| H  | -9.336682000 | -1.613028000 | 2.130741000  |
| N  | 1.456296000  | 1.455556000  | 0.014448000  |
| N  | 1.456296000  | -1.455556000 | 0.014448000  |
| N  | -1.456296000 | 1.455556000  | 0.014448000  |
| N  | -1.456296000 | -1.455556000 | 0.014448000  |
| Si | 0.000000000  | 7.407014000  | -2.455381000 |
| Si | 0.000000000  | -7.407014000 | -2.455381000 |
| Si | 7.447334000  | 0.000000000  | 2.394530000  |
| Si | -7.447334000 | 0.000000000  | 2.394530000  |

**81. Cu(TPP]; S = ½ (saddled)**

|    |              |              |              |
|----|--------------|--------------|--------------|
| Cu | 0.000000000  | 0.000000000  | 0.000000000  |
| C  | 0.000000000  | 3.447753000  | 0.000000000  |
| C  | 0.000000000  | 4.937665000  | 0.000000000  |
| C  | 0.000000000  | 7.751261000  | 0.000000000  |
| C  | 0.000000000  | -3.447753000 | 0.000000000  |
| C  | 0.000000000  | -4.937665000 | 0.000000000  |
| C  | 0.000000000  | -7.751261000 | 0.000000000  |
| C  | 0.601259000  | 7.048517000  | -1.047379000 |
| C  | 0.601259000  | -7.048517000 | 1.047379000  |
| C  | 0.601431000  | 5.652989000  | -1.046089000 |
| C  | 0.601431000  | -5.652989000 | 1.046089000  |
| C  | 1.229221000  | 2.786903000  | 0.074506000  |
| C  | 1.229221000  | -2.786903000 | -0.074506000 |
| C  | 2.494387000  | 3.456791000  | 0.243538000  |
| C  | 2.494387000  | -3.456791000 | -0.243538000 |
| C  | 2.786903000  | 1.229221000  | 0.074506000  |
| C  | 2.786903000  | -1.229221000 | -0.074506000 |
| C  | 3.447753000  | 0.000000000  | 0.000000000  |
| C  | 3.456791000  | 2.494387000  | 0.243538000  |
| C  | 3.456791000  | -2.494387000 | -0.243538000 |
| C  | 4.937665000  | 0.000000000  | 0.000000000  |
| C  | 5.652989000  | 0.601431000  | -1.046089000 |
| C  | 5.652989000  | -0.601431000 | 1.046089000  |
| C  | 7.048517000  | 0.601259000  | -1.047379000 |
| C  | 7.048517000  | -0.601259000 | 1.047379000  |
| C  | 7.751261000  | 0.000000000  | 0.000000000  |
| C  | -0.601259000 | 7.048517000  | 1.047379000  |
| C  | -0.601259000 | -7.048517000 | -1.047379000 |
| C  | -0.601431000 | 5.652989000  | 1.046089000  |
| C  | -0.601431000 | -5.652989000 | -1.046089000 |



|   |              |              |              |
|---|--------------|--------------|--------------|
| C | -1.229221000 | 2.786903000  | -0.074506000 |
| C | -1.229221000 | -2.786903000 | 0.074506000  |
| C | -2.494387000 | 3.456791000  | -0.243538000 |
| C | -2.494387000 | -3.456791000 | 0.243538000  |
| C | -2.786903000 | 1.229221000  | -0.074506000 |
| C | -2.786903000 | -1.229221000 | 0.074506000  |
| C | -3.447753000 | 0.000000000  | 0.000000000  |
| C | -3.456791000 | 2.494387000  | -0.243538000 |
| C | -3.456791000 | -2.494387000 | 0.243538000  |
| C | -4.937665000 | 0.000000000  | 0.000000000  |
| C | -5.652989000 | 0.601431000  | 1.046089000  |
| C | -5.652989000 | -0.601431000 | -1.046089000 |
| C | -7.048517000 | 0.601259000  | 1.047379000  |
| C | -7.048517000 | -0.601259000 | -1.047379000 |
| C | -7.751261000 | 0.000000000  | 0.000000000  |
| H | 0.000000000  | 8.840782000  | 0.000000000  |
| H | 0.000000000  | -8.840782000 | 0.000000000  |
| H | 1.066162000  | 5.101418000  | -1.862591000 |
| H | 1.066162000  | -5.101418000 | 1.862591000  |
| H | 1.067658000  | 7.587542000  | -1.871084000 |
| H | 1.067658000  | -7.587542000 | 1.871084000  |
| H | 2.620758000  | 4.525197000  | 0.367767000  |
| H | 2.620758000  | -4.525197000 | -0.367767000 |
| H | 4.525197000  | 2.620758000  | 0.367767000  |
| H | 4.525197000  | -2.620758000 | -0.367767000 |
| H | 5.101418000  | 1.066162000  | -1.862591000 |
| H | 5.101418000  | -1.066162000 | 1.862591000  |
| H | 7.587542000  | 1.067658000  | -1.871084000 |
| H | 7.587542000  | -1.067658000 | 1.871084000  |
| H | 8.840782000  | 0.000000000  | 0.000000000  |
| H | -1.066162000 | 5.101418000  | 1.862591000  |
| H | -1.066162000 | -5.101418000 | -1.862591000 |
| H | -1.067658000 | 7.587542000  | 1.871084000  |
| H | -1.067658000 | -7.587542000 | -1.871084000 |
| H | -2.620758000 | 4.525197000  | -0.367767000 |
| H | -2.620758000 | -4.525197000 | 0.367767000  |
| H | -4.525197000 | 2.620758000  | -0.367767000 |
| H | -4.525197000 | -2.620758000 | 0.367767000  |
| H | -5.101418000 | 1.066162000  | 1.862591000  |
| H | -5.101418000 | -1.066162000 | -1.862591000 |
| H | -7.587542000 | 1.067658000  | 1.871084000  |
| H | -7.587542000 | -1.067658000 | -1.871084000 |
| H | -8.840782000 | 0.000000000  | 0.000000000  |
| N | 1.422824000  | 1.422824000  | -0.003837000 |
| N | 1.422824000  | -1.422824000 | 0.003837000  |
| N | -1.422824000 | 1.422824000  | 0.003837000  |
| N | -1.422824000 | -1.422824000 | -0.003837000 |

**82. Cu(TPP]; S = ½ (ruffled)**

|    |              |              |              |
|----|--------------|--------------|--------------|
| Cu | 0.000000000  | 0.000000000  | 0.000000000  |
| C  | 0.680799000  | 4.220153000  | -0.007468000 |
| C  | 0.680799000  | -4.220153000 | 0.007468000  |
| C  | 1.100110000  | 2.840178000  | -0.010735000 |
| C  | 1.100110000  | -2.840178000 | 0.010735000  |
| C  | 2.433903000  | 2.433903000  | -0.018773000 |
| C  | 2.433903000  | -2.433903000 | 0.018773000  |
| C  | 2.840178000  | 1.100110000  | -0.010735000 |
| C  | 2.840178000  | -1.100110000 | 0.010735000  |
| C  | 3.490858000  | 3.490858000  | -0.032401000 |
| C  | 3.490858000  | -3.490858000 | 0.032401000  |
| C  | 3.984818000  | 3.984818000  | -1.245871000 |
| C  | 3.984818000  | -3.984818000 | 1.245871000  |
| C  | 4.000697000  | 4.000697000  | 1.167821000  |
| C  | 4.000697000  | -4.000697000 | -1.167821000 |
| C  | 4.220153000  | 0.680799000  | -0.007468000 |
| C  | 4.220153000  | -0.680799000 | 0.007468000  |
| C  | 4.972426000  | 4.972426000  | -1.260063000 |
| C  | 4.972426000  | -4.972426000 | 1.260063000  |
| C  | 4.988298000  | 4.988298000  | 1.156032000  |
| C  | 4.988298000  | -4.988298000 | -1.156032000 |
| C  | 5.476562000  | 5.476562000  | -0.058540000 |
| C  | 5.476562000  | -5.476562000 | 0.058540000  |
| C  | -0.680799000 | 4.220153000  | 0.007468000  |
| C  | -0.680799000 | -4.220153000 | -0.007468000 |
| C  | -1.100110000 | 2.840178000  | 0.010735000  |
| C  | -1.100110000 | -2.840178000 | -0.010735000 |
| C  | -2.433903000 | 2.433903000  | 0.018773000  |
| C  | -2.433903000 | -2.433903000 | -0.018773000 |
| C  | -2.840178000 | 1.100110000  | 0.010735000  |
| C  | -2.840178000 | -1.100110000 | -0.010735000 |
| C  | -3.490858000 | 3.490858000  | 0.032401000  |
| C  | -3.490858000 | -3.490858000 | -0.032401000 |
| C  | -3.984818000 | 3.984818000  | 1.245871000  |
| C  | -3.984818000 | -3.984818000 | -1.245871000 |
| C  | -4.000697000 | 4.000697000  | -1.167821000 |
| C  | -4.000697000 | -4.000697000 | 1.167821000  |
| C  | -4.220153000 | 0.680799000  | 0.007468000  |
| C  | -4.220153000 | -0.680799000 | -0.007468000 |
| C  | -4.972426000 | 4.972426000  | 1.260063000  |
| C  | -4.972426000 | -4.972426000 | -1.260063000 |
| C  | -4.988298000 | 4.988298000  | -1.156032000 |
| C  | -4.988298000 | -4.988298000 | 1.156032000  |
| C  | -5.476562000 | 5.476562000  | 0.058540000  |
| C  | -5.476562000 | -5.476562000 | -0.058540000 |
| H  | 1.353203000  | 5.070105000  | -0.014688000 |
| H  | 1.353203000  | -5.070105000 | 0.014688000  |
| H  | 3.587189000  | 3.587189000  | -2.179270000 |

|   |              |              |              |
|---|--------------|--------------|--------------|
| H | 3.587189000  | -3.587189000 | 2.179270000  |
| H | 3.615368000  | 3.615368000  | 2.111468000  |
| H | 3.615368000  | -3.615368000 | -2.111468000 |
| H | 5.070105000  | 1.353203000  | -0.014688000 |
| H | 5.070105000  | -1.353203000 | 0.014688000  |
| H | 5.347866000  | 5.347866000  | -2.211250000 |
| H | 5.347866000  | -5.347866000 | 2.211250000  |
| H | 5.376168000  | 5.376168000  | 2.097161000  |
| H | 5.376168000  | -5.376168000 | -2.097161000 |
| H | 6.246956000  | 6.246956000  | -0.068652000 |
| H | 6.246956000  | -6.246956000 | 0.068652000  |
| H | -1.353203000 | 5.070105000  | 0.014688000  |
| H | -1.353203000 | -5.070105000 | -0.014688000 |
| H | -3.587189000 | 3.587189000  | 2.179270000  |
| H | -3.587189000 | -3.587189000 | -2.179270000 |
| H | -3.615368000 | 3.615368000  | -2.111468000 |
| H | -3.615368000 | -3.615368000 | 2.111468000  |
| H | -5.070105000 | 1.353203000  | 0.014688000  |
| H | -5.070105000 | -1.353203000 | -0.014688000 |
| H | -5.347866000 | 5.347866000  | 2.211250000  |
| H | -5.347866000 | -5.347866000 | -2.211250000 |
| H | -5.376168000 | 5.376168000  | -2.097161000 |
| H | -5.376168000 | -5.376168000 | 2.097161000  |
| H | -6.246956000 | 6.246956000  | 0.068652000  |
| H | -6.246956000 | -6.246956000 | -0.068652000 |
| N | 0.000000000  | 2.008300000  | 0.000000000  |
| N | 0.000000000  | -2.008300000 | 0.000000000  |
| N | 2.008300000  | 0.000000000  | 0.000000000  |
| N | -2.008300000 | 0.000000000  | 0.000000000  |

### 83. Ni (TPP]; S = 0 (saddled)

|    |             |              |              |
|----|-------------|--------------|--------------|
| Ni | 0.000000000 | 0.000000000  | 0.000000000  |
| C  | 0.000000000 | 3.419657000  | 0.000000000  |
| C  | 0.000000000 | 4.907593000  | 0.000000000  |
| C  | 0.000000000 | 7.720939000  | 0.000000000  |
| C  | 0.000000000 | -3.419657000 | 0.000000000  |
| C  | 0.000000000 | -4.907593000 | 0.000000000  |
| C  | 0.000000000 | -7.720939000 | 0.000000000  |
| C  | 0.762020000 | 7.018378000  | -0.937103000 |
| C  | 0.762020000 | -7.018378000 | 0.937103000  |
| C  | 0.762353000 | 5.622844000  | -0.935608000 |
| C  | 0.762353000 | -5.622844000 | 0.935608000  |
| C  | 1.187824000 | 2.739823000  | 0.239071000  |
| C  | 1.187824000 | -2.739823000 | -0.239071000 |
| C  | 2.426528000 | 3.387891000  | 0.573471000  |
| C  | 2.426528000 | -3.387891000 | -0.573471000 |
| C  | 2.739823000 | 1.187824000  | 0.239071000  |
| C  | 2.739823000 | -1.187824000 | -0.239071000 |
| C  | 3.387891000 | 2.426528000  | 0.573471000  |

|   |              |              |              |
|---|--------------|--------------|--------------|
| C | 3.387891000  | -2.426528000 | -0.573471000 |
| C | 3.419657000  | 0.000000000  | 0.000000000  |
| C | 4.907593000  | 0.000000000  | 0.000000000  |
| C | 5.622844000  | 0.762353000  | -0.935608000 |
| C | 5.622844000  | -0.762353000 | 0.935608000  |
| C | 7.018378000  | 0.762020000  | -0.937103000 |
| C | 7.018378000  | -0.762020000 | 0.937103000  |
| C | 7.720939000  | 0.000000000  | 0.000000000  |
| C | -0.762020000 | 7.018378000  | 0.937103000  |
| C | -0.762020000 | -7.018378000 | -0.937103000 |
| C | -0.762353000 | 5.622844000  | 0.935608000  |
| C | -0.762353000 | -5.622844000 | -0.935608000 |
| C | -1.187824000 | 2.739823000  | -0.239071000 |
| C | -1.187824000 | -2.739823000 | 0.239071000  |
| C | -2.426528000 | 3.387891000  | -0.573471000 |
| C | -2.426528000 | -3.387891000 | 0.573471000  |
| C | -2.739823000 | 1.187824000  | -0.239071000 |
| C | -2.739823000 | -1.187824000 | 0.239071000  |
| C | -3.387891000 | 2.426528000  | -0.573471000 |
| C | -3.387891000 | -2.426528000 | 0.573471000  |
| C | -3.419657000 | 0.000000000  | 0.000000000  |
| C | -4.907593000 | 0.000000000  | 0.000000000  |
| C | -5.622844000 | 0.762353000  | 0.935608000  |
| C | -5.622844000 | -0.762353000 | -0.935608000 |
| C | -7.018378000 | 0.762020000  | 0.937103000  |
| C | -7.018378000 | -0.762020000 | -0.937103000 |
| C | -7.720939000 | 0.000000000  | 0.000000000  |
| H | 0.000000000  | 8.810441000  | 0.000000000  |
| H | 0.000000000  | -8.810441000 | 0.000000000  |
| H | 1.352452000  | 5.071113000  | -1.666486000 |
| H | 1.352452000  | -5.071113000 | 1.666486000  |
| H | 1.354530000  | 7.557515000  | -1.675235000 |
| H | 1.354530000  | -7.557515000 | 1.675235000  |
| H | 2.532054000  | 4.445474000  | 0.781154000  |
| H | 2.532054000  | -4.445474000 | -0.781154000 |
| H | 4.445474000  | 2.532054000  | 0.781154000  |
| H | 4.445474000  | -2.532054000 | -0.781154000 |
| H | 5.071113000  | 1.352452000  | -1.666486000 |
| H | 5.071113000  | -1.352452000 | 1.666486000  |
| H | 7.557515000  | 1.354530000  | -1.675235000 |
| H | 7.557515000  | -1.354530000 | 1.675235000  |
| H | 8.810441000  | 0.000000000  | 0.000000000  |
| H | -1.352452000 | 5.071113000  | 1.666486000  |
| H | -1.352452000 | -5.071113000 | -1.666486000 |
| H | -1.354530000 | 7.557515000  | 1.675235000  |
| H | -1.354530000 | -7.557515000 | -1.675235000 |
| H | -2.532054000 | 4.445474000  | -0.781154000 |
| H | -2.532054000 | -4.445474000 | 0.781154000  |
| H | -4.445474000 | 2.532054000  | -0.781154000 |
| H | -4.445474000 | -2.532054000 | 0.781154000  |
| H | -5.071113000 | 1.352452000  | 1.666486000  |

|   |              |              |              |
|---|--------------|--------------|--------------|
| H | -5.071113000 | -1.352452000 | -1.666486000 |
| H | -7.557515000 | 1.354530000  | 1.675235000  |
| H | -7.557515000 | -1.354530000 | -1.675235000 |
| H | -8.810441000 | 0.000000000  | 0.000000000  |
| N | 1.373222000  | 1.373222000  | 0.098972000  |
| N | 1.373222000  | -1.373222000 | -0.098972000 |
| N | -1.373222000 | 1.373222000  | -0.098972000 |
| N | -1.373222000 | -1.373222000 | 0.098972000  |

**84. Ni(TPP]; S = 0 (ruffled)**

|    |              |              |              |
|----|--------------|--------------|--------------|
| Ni | 0.000000000  | 0.000000000  | 0.000000000  |
| C  | 0.649189000  | 4.149495000  | 0.204537000  |
| C  | 0.649189000  | -4.149495000 | -0.204537000 |
| C  | 1.058748000  | 2.772913000  | 0.296290000  |
| C  | 1.058748000  | -2.772913000 | -0.296290000 |
| C  | 2.370475000  | 2.370475000  | 0.514160000  |
| C  | 2.370475000  | -2.370475000 | -0.514160000 |
| C  | 2.772913000  | 1.058748000  | 0.296290000  |
| C  | 2.772913000  | -1.058748000 | -0.296290000 |
| C  | 3.396669000  | 3.396669000  | 0.862528000  |
| C  | 3.396669000  | -3.396669000 | -0.862528000 |
| C  | 3.681396000  | 3.681396000  | 2.203258000  |
| C  | 3.681396000  | -3.681396000 | -2.203258000 |
| C  | 4.086996000  | 4.086996000  | -0.141843000 |
| C  | 4.086996000  | -4.086996000 | 0.141843000  |
| C  | 4.149495000  | 0.649189000  | 0.204537000  |
| C  | 4.149495000  | -0.649189000 | -0.204537000 |
| C  | 4.640886000  | 4.640886000  | 2.535510000  |
| C  | 4.640886000  | -4.640886000 | -2.535510000 |
| C  | 5.046368000  | 5.046368000  | 0.188199000  |
| C  | 5.046368000  | -5.046368000 | -0.188199000 |
| C  | 5.325529000  | 5.325529000  | 1.528652000  |
| C  | 5.325529000  | -5.325529000 | -1.528652000 |
| C  | -0.649189000 | 4.149495000  | -0.204537000 |
| C  | -0.649189000 | -4.149495000 | 0.204537000  |
| C  | -1.058748000 | 2.772913000  | -0.296290000 |
| C  | -1.058748000 | -2.772913000 | 0.296290000  |
| C  | -2.370475000 | 2.370475000  | -0.514160000 |
| C  | -2.370475000 | -2.370475000 | 0.514160000  |
| C  | -2.772913000 | 1.058748000  | -0.296290000 |
| C  | -2.772913000 | -1.058748000 | 0.296290000  |
| C  | -3.396669000 | 3.396669000  | -0.862528000 |
| C  | -3.396669000 | -3.396669000 | 0.862528000  |
| C  | -3.681396000 | 3.681396000  | -2.203258000 |
| C  | -3.681396000 | -3.681396000 | 2.203258000  |
| C  | -4.086996000 | 4.086996000  | 0.141843000  |
| C  | -4.086996000 | -4.086996000 | -0.141843000 |
| C  | -4.149495000 | 0.649189000  | -0.204537000 |
| C  | -4.149495000 | -0.649189000 | 0.204537000  |

|   |              |              |              |
|---|--------------|--------------|--------------|
| C | -4.640886000 | 4.640886000  | -2.535510000 |
| C | -4.640886000 | -4.640886000 | 2.535510000  |
| C | -5.046368000 | 5.046368000  | -0.188199000 |
| C | -5.046368000 | -5.046368000 | 0.188199000  |
| C | -5.325529000 | 5.325529000  | -1.528652000 |
| C | -5.325529000 | -5.325529000 | 1.528652000  |
| H | 1.296504000  | 4.996291000  | 0.400153000  |
| H | 1.296504000  | -4.996291000 | -0.400153000 |
| H | 3.143992000  | 3.143992000  | 2.984171000  |
| H | 3.143992000  | -3.143992000 | -2.984171000 |
| H | 3.863282000  | 3.863282000  | -1.184531000 |
| H | 3.863282000  | -3.863282000 | 1.184531000  |
| H | 4.852885000  | 4.852885000  | 3.582746000  |
| H | 4.852885000  | -4.852885000 | -3.582746000 |
| H | 4.996291000  | 1.296504000  | 0.400153000  |
| H | 4.996291000  | -1.296504000 | -0.400153000 |
| H | 5.575964000  | 5.575964000  | -0.602824000 |
| H | 5.575964000  | -5.575964000 | 0.602824000  |
| H | 6.073933000  | 6.073933000  | 1.787285000  |
| H | 6.073933000  | -6.073933000 | -1.787285000 |
| H | -1.296504000 | 4.996291000  | -0.400153000 |
| H | -1.296504000 | -4.996291000 | 0.400153000  |
| H | -3.143992000 | 3.143992000  | -2.984171000 |
| H | -3.143992000 | -3.143992000 | 2.984171000  |
| H | -3.863282000 | 3.863282000  | 1.184531000  |
| H | -3.863282000 | -3.863282000 | -1.184531000 |
| H | -4.852885000 | 4.852885000  | -3.582746000 |
| H | -4.852885000 | -4.852885000 | 3.582746000  |
| H | -4.996291000 | 1.296504000  | -0.400153000 |
| H | -4.996291000 | -1.296504000 | 0.400153000  |
| H | -5.575964000 | 5.575964000  | 0.602824000  |
| H | -5.575964000 | -5.575964000 | -0.602824000 |
| H | -6.073933000 | 6.073933000  | -1.787285000 |
| H | -6.073933000 | -6.073933000 | 1.787285000  |
| N | 0.000000000  | 1.932680000  | 0.000000000  |
| N | 0.000000000  | -1.932680000 | 0.000000000  |
| N | 1.932680000  | 0.000000000  | 0.000000000  |
| N | -1.932680000 | 0.000000000  | 0.000000000  |

**85. Pd(TPP)]; S = 0 (saddled)**

|    |             |              |              |
|----|-------------|--------------|--------------|
| Pd | 0.000000000 | 0.000000000  | 0.000000000  |
| C  | 0.000000000 | 3.452342000  | 0.000000000  |
| C  | 0.000000000 | 4.942876000  | 0.000000000  |
| C  | 0.000000000 | 7.755811000  | 0.000000000  |
| C  | 0.000000000 | -3.452342000 | 0.000000000  |
| C  | 0.000000000 | -4.942876000 | 0.000000000  |
| C  | 0.000000000 | -7.755811000 | 0.000000000  |
| C  | 0.604308000 | 5.657555000  | -1.044476000 |
| C  | 0.604308000 | -5.657555000 | 1.044476000  |

|   |              |              |              |
|---|--------------|--------------|--------------|
| C | 0.604835000  | 7.053129000  | -1.045357000 |
| C | 0.604835000  | -7.053129000 | 1.045357000  |
| C | 1.231392000  | 2.797683000  | 0.082878000  |
| C | 1.231392000  | -2.797683000 | -0.082878000 |
| C | 2.500788000  | 3.463116000  | 0.247666000  |
| C | 2.500788000  | -3.463116000 | -0.247666000 |
| C | 2.797683000  | 1.231392000  | 0.082878000  |
| C | 2.797683000  | -1.231392000 | -0.082878000 |
| C | 3.452342000  | 0.000000000  | 0.000000000  |
| C | 3.463116000  | 2.500788000  | 0.247666000  |
| C | 3.463116000  | -2.500788000 | -0.247666000 |
| C | 4.942876000  | 0.000000000  | 0.000000000  |
| C | 5.657555000  | 0.604308000  | -1.044476000 |
| C | 5.657555000  | -0.604308000 | 1.044476000  |
| C | 7.053129000  | 0.604835000  | -1.045357000 |
| C | 7.053129000  | -0.604835000 | 1.045357000  |
| C | 7.755811000  | 0.000000000  | 0.000000000  |
| C | -0.604308000 | 5.657555000  | 1.044476000  |
| C | -0.604308000 | -5.657555000 | -1.044476000 |
| C | -0.604835000 | 7.053129000  | 1.045357000  |
| C | -0.604835000 | -7.053129000 | -1.045357000 |
| C | -1.231392000 | 2.797683000  | -0.082878000 |
| C | -1.231392000 | -2.797683000 | 0.082878000  |
| C | -2.500788000 | 3.463116000  | -0.247666000 |
| C | -2.500788000 | -3.463116000 | 0.247666000  |
| C | -2.797683000 | 1.231392000  | -0.082878000 |
| C | -2.797683000 | -1.231392000 | 0.082878000  |
| C | -3.452342000 | 0.000000000  | 0.000000000  |
| C | -3.463116000 | 2.500788000  | -0.247666000 |
| C | -3.463116000 | -2.500788000 | 0.247666000  |
| C | -4.942876000 | 0.000000000  | 0.000000000  |
| C | -5.657555000 | 0.604308000  | 1.044476000  |
| C | -5.657555000 | -0.604308000 | -1.044476000 |
| C | -7.053129000 | 0.604835000  | 1.045357000  |
| C | -7.053129000 | -0.604835000 | -1.045357000 |
| C | -7.755811000 | 0.000000000  | 0.000000000  |
| H | 0.000000000  | 8.845232000  | 0.000000000  |
| H | 0.000000000  | -8.845232000 | 0.000000000  |
| H | 1.071419000  | 5.105786000  | -1.859463000 |
| H | 1.071419000  | -5.105786000 | 1.859463000  |
| H | 1.074194000  | 7.592074000  | -1.867417000 |
| H | 1.074194000  | -7.592074000 | 1.867417000  |
| H | 2.628703000  | 4.531842000  | 0.367467000  |
| H | 2.628703000  | -4.531842000 | -0.367467000 |
| H | 4.531842000  | 2.628703000  | 0.367467000  |
| H | 4.531842000  | -2.628703000 | -0.367467000 |
| H | 5.105786000  | 1.071419000  | -1.859463000 |
| H | 5.105786000  | -1.071419000 | 1.859463000  |
| H | 7.592074000  | 1.074194000  | -1.867417000 |
| H | 7.592074000  | -1.074194000 | 1.867417000  |
| H | 8.845232000  | 0.000000000  | 0.000000000  |

|   |              |              |              |
|---|--------------|--------------|--------------|
| H | -1.071419000 | 5.105786000  | 1.859463000  |
| H | -1.071419000 | -5.105786000 | -1.859463000 |
| H | -1.074194000 | 7.592074000  | 1.867417000  |
| H | -1.074194000 | -7.592074000 | -1.867417000 |
| H | -2.628703000 | 4.531842000  | -0.367467000 |
| H | -2.628703000 | -4.531842000 | 0.367467000  |
| H | -4.531842000 | 2.628703000  | -0.367467000 |
| H | -4.531842000 | -2.628703000 | 0.367467000  |
| H | -5.105786000 | 1.071419000  | 1.859463000  |
| H | -5.105786000 | -1.071419000 | -1.859463000 |
| H | -7.592074000 | 1.074194000  | 1.867417000  |
| H | -7.592074000 | -1.074194000 | -1.867417000 |
| H | -8.845232000 | 0.000000000  | 0.000000000  |
| N | 1.433368000  | 1.433368000  | 0.011653000  |
| N | 1.433368000  | -1.433368000 | -0.011653000 |
| N | -1.433368000 | 1.433368000  | -0.011653000 |
| N | -1.433368000 | -1.433368000 | 0.011653000  |

#### 86. Pd(TPP]; S = 0 (ruffled)

|    |              |              |              |
|----|--------------|--------------|--------------|
| Pd | 0.000000000  | 0.000000000  | 0.000000000  |
| C  | 0.680818000  | 4.229569000  | -0.006889000 |
| C  | 0.680818000  | -4.229569000 | 0.006889000  |
| C  | 1.106195000  | 2.850311000  | -0.009967000 |
| C  | 1.106195000  | -2.850311000 | 0.009967000  |
| C  | 2.437641000  | 2.437641000  | -0.017311000 |
| C  | 2.437641000  | -2.437641000 | 0.017311000  |
| C  | 2.850311000  | 1.106195000  | -0.009967000 |
| C  | 2.850311000  | -1.106195000 | 0.009967000  |
| C  | 3.494763000  | 3.494763000  | -0.030437000 |
| C  | 3.494763000  | -3.494763000 | 0.030437000  |
| C  | 3.988515000  | 3.988515000  | -1.243809000 |
| C  | 3.988515000  | -3.988515000 | 1.243809000  |
| C  | 4.003893000  | 4.003893000  | 1.170132000  |
| C  | 4.003893000  | -4.003893000 | -1.170132000 |
| C  | 4.229569000  | 0.680818000  | -0.006889000 |
| C  | 4.229569000  | -0.680818000 | 0.006889000  |
| C  | 4.976105000  | 4.976105000  | -1.257539000 |
| C  | 4.976105000  | -4.976105000 | 1.257539000  |
| C  | 4.991482000  | 4.991482000  | 1.158689000  |
| C  | 4.991482000  | -4.991482000 | -1.158689000 |
| C  | 5.479914000  | 5.479914000  | -0.055755000 |
| C  | 5.479914000  | -5.479914000 | 0.055755000  |
| C  | -0.680818000 | 4.229569000  | 0.006889000  |
| C  | -0.680818000 | -4.229569000 | -0.006889000 |
| C  | -1.106195000 | 2.850311000  | 0.009967000  |
| C  | -1.106195000 | -2.850311000 | -0.009967000 |
| C  | -2.437641000 | 2.437641000  | 0.017311000  |
| C  | -2.437641000 | -2.437641000 | -0.017311000 |
| C  | -2.850311000 | 1.106195000  | 0.009967000  |



|   |              |              |              |
|---|--------------|--------------|--------------|
| C | -2.850311000 | -1.106195000 | -0.009967000 |
| C | -3.494763000 | 3.494763000  | 0.030437000  |
| C | -3.494763000 | -3.494763000 | -0.030437000 |
| C | -3.988515000 | 3.988515000  | 1.243809000  |
| C | -3.988515000 | -3.988515000 | -1.243809000 |
| C | -4.003893000 | 4.003893000  | -1.170132000 |
| C | -4.003893000 | -4.003893000 | 1.170132000  |
| C | -4.229569000 | 0.680818000  | 0.006889000  |
| C | -4.229569000 | -0.680818000 | -0.006889000 |
| C | -4.976105000 | 4.976105000  | 1.257539000  |
| C | -4.976105000 | -4.976105000 | -1.257539000 |
| C | -4.991482000 | 4.991482000  | -1.158689000 |
| C | -4.991482000 | -4.991482000 | 1.158689000  |
| C | -5.479914000 | 5.479914000  | 0.055755000  |
| C | -5.479914000 | -5.479914000 | -0.055755000 |
| H | 1.352369000  | 5.080302000  | -0.013667000 |
| H | 1.352369000  | -5.080302000 | 0.013667000  |
| H | 3.590933000  | 3.590933000  | -2.177218000 |
| H | 3.590933000  | -3.590933000 | 2.177218000  |
| H | 3.618241000  | 3.618241000  | 2.113487000  |
| H | 3.618241000  | -3.618241000 | -2.113487000 |
| H | 5.080302000  | 1.352369000  | -0.013667000 |
| H | 5.080302000  | -1.352369000 | 0.013667000  |
| H | 5.351727000  | 5.351727000  | -2.208528000 |
| H | 5.351727000  | -5.351727000 | 2.208528000  |
| H | 5.379191000  | 5.379191000  | 2.099927000  |
| H | 5.379191000  | -5.379191000 | -2.099927000 |
| H | 6.250294000  | 6.250294000  | -0.065544000 |
| H | 6.250294000  | -6.250294000 | 0.065544000  |
| H | -1.352369000 | 5.080302000  | 0.013667000  |
| H | -1.352369000 | -5.080302000 | -0.013667000 |
| H | -3.590933000 | 3.590933000  | 2.177218000  |
| H | -3.590933000 | -3.590933000 | -2.177218000 |
| H | -3.618241000 | 3.618241000  | -2.113487000 |
| H | -3.618241000 | -3.618241000 | 2.113487000  |
| H | -5.080302000 | 1.352369000  | 0.013667000  |
| H | -5.080302000 | -1.352369000 | -0.013667000 |
| H | -5.351727000 | 5.351727000  | 2.208528000  |
| H | -5.351727000 | -5.351727000 | -2.208528000 |
| H | -5.379191000 | 5.379191000  | -2.099927000 |
| H | -5.379191000 | -5.379191000 | 2.099927000  |
| H | -6.250294000 | 6.250294000  | 0.065544000  |
| H | -6.250294000 | -6.250294000 | -0.065544000 |
| N | 0.000000000  | 2.024861000  | 0.000000000  |
| N | 0.000000000  | -2.024861000 | 0.000000000  |
| N | 2.024861000  | 0.000000000  | 0.000000000  |
| N | -2.024861000 | 0.000000000  | 0.000000000  |

**87. Pt(TPP]; S = 0 (saddled)**

|    |              |              |              |
|----|--------------|--------------|--------------|
| Pt | 0.000000000  | 0.000000000  | 0.000000000  |
| C  | 0.000000000  | 3.454272000  | 0.000000000  |
| C  | 0.000000000  | 4.945842000  | 0.000000000  |
| C  | 0.000000000  | 7.758495000  | 0.000000000  |
| C  | 0.000000000  | -3.454272000 | 0.000000000  |
| C  | 0.000000000  | -4.945842000 | 0.000000000  |
| C  | 0.000000000  | -7.758495000 | 0.000000000  |
| C  | 0.573345000  | 5.660154000  | -1.061848000 |
| C  | 0.573345000  | -5.660154000 | 1.061848000  |
| C  | 0.573614000  | 7.055902000  | -1.062811000 |
| C  | 0.573614000  | -7.055902000 | 1.062811000  |
| C  | 1.232326000  | 2.801214000  | 0.069961000  |
| C  | 1.232326000  | -2.801214000 | -0.069961000 |
| C  | 2.503142000  | 3.465206000  | 0.208030000  |
| C  | 2.503142000  | -3.465206000 | -0.208030000 |
| C  | 2.801214000  | 1.232326000  | 0.069961000  |
| C  | 2.801214000  | -1.232326000 | -0.069961000 |
| C  | 3.454272000  | 0.000000000  | 0.000000000  |
| C  | 3.465206000  | 2.503142000  | 0.208030000  |
| C  | 3.465206000  | -2.503142000 | -0.208030000 |
| C  | 4.945842000  | 0.000000000  | 0.000000000  |
| C  | 5.660154000  | 0.573345000  | -1.061848000 |
| C  | 5.660154000  | -0.573345000 | 1.061848000  |
| C  | 7.055902000  | 0.573614000  | -1.062811000 |
| C  | 7.055902000  | -0.573614000 | 1.062811000  |
| C  | 7.758495000  | 0.000000000  | 0.000000000  |
| C  | -0.573345000 | 5.660154000  | 1.061848000  |
| C  | -0.573345000 | -5.660154000 | -1.061848000 |
| C  | -0.573614000 | 7.055902000  | 1.062811000  |
| C  | -0.573614000 | -7.055902000 | -1.062811000 |
| C  | -1.232326000 | 2.801214000  | -0.069961000 |
| C  | -1.232326000 | -2.801214000 | 0.069961000  |
| C  | -2.503142000 | 3.465206000  | -0.208030000 |
| C  | -2.503142000 | -3.465206000 | 0.208030000  |
| C  | -2.801214000 | 1.232326000  | -0.069961000 |
| C  | -2.801214000 | -1.232326000 | 0.069961000  |
| C  | -3.454272000 | 0.000000000  | 0.000000000  |
| C  | -3.465206000 | 2.503142000  | -0.208030000 |
| C  | -3.465206000 | -2.503142000 | 0.208030000  |
| C  | -4.945842000 | 0.000000000  | 0.000000000  |
| C  | -5.660154000 | 0.573345000  | 1.061848000  |
| C  | -5.660154000 | -0.573345000 | -1.061848000 |
| C  | -7.055902000 | 0.573614000  | 1.062811000  |
| C  | -7.055902000 | -0.573614000 | -1.062811000 |
| C  | -7.758495000 | 0.000000000  | 0.000000000  |
| H  | 0.000000000  | 8.847978000  | 0.000000000  |
| H  | 0.000000000  | -8.847978000 | 0.000000000  |
| H  | 1.016559000  | 5.108245000  | -1.890050000 |

|   |              |              |              |
|---|--------------|--------------|--------------|
| H | 1.016559000  | -5.108245000 | 1.890050000  |
| H | 1.018590000  | 7.595014000  | -1.898220000 |
| H | 1.018590000  | -7.595014000 | 1.898220000  |
| H | 2.632457000  | 4.535360000  | 0.309932000  |
| H | 2.632457000  | -4.535360000 | -0.309932000 |
| H | 4.535360000  | 2.632457000  | 0.309932000  |
| H | 4.535360000  | -2.632457000 | -0.309932000 |
| H | 5.108245000  | 1.016559000  | -1.890050000 |
| H | 5.108245000  | -1.016559000 | 1.890050000  |
| H | 7.595014000  | 1.018590000  | -1.898220000 |
| H | 7.595014000  | -1.018590000 | 1.898220000  |
| H | 8.847978000  | 0.000000000  | 0.000000000  |
| H | -1.016559000 | 5.108245000  | 1.890050000  |
| H | -1.016559000 | -5.108245000 | -1.890050000 |
| H | -1.018590000 | 7.595014000  | 1.898220000  |
| H | -1.018590000 | -7.595014000 | -1.898220000 |
| H | -2.632457000 | 4.535360000  | -0.309932000 |
| H | -2.632457000 | -4.535360000 | 0.309932000  |
| H | -4.535360000 | 2.632457000  | -0.309932000 |
| H | -4.535360000 | -2.632457000 | 0.309932000  |
| H | -5.108245000 | 1.016559000  | 1.890050000  |
| H | -5.108245000 | -1.016559000 | -1.890050000 |
| H | -7.595014000 | 1.018590000  | 1.898220000  |
| H | -7.595014000 | -1.018590000 | -1.898220000 |
| H | -8.847978000 | 0.000000000  | 0.000000000  |
| N | 1.432727000  | 1.432727000  | 0.014557000  |
| N | 1.432727000  | -1.432727000 | -0.014557000 |
| N | -1.432727000 | 1.432727000  | -0.014557000 |
| N | -1.432727000 | -1.432727000 | 0.014557000  |

**88. Pt(TPP]; S = 0 (ruffled)**

|    |             |              |              |
|----|-------------|--------------|--------------|
| Pt | 0.000000000 | 0.000000000  | 0.000000000  |
| C  | 0.680663000 | 4.228743000  | -0.005013000 |
| C  | 0.680663000 | -4.228743000 | 0.005013000  |
| C  | 1.108052000 | 2.852416000  | -0.007190000 |
| C  | 1.108052000 | -2.852416000 | 0.007190000  |
| C  | 2.438763000 | 2.438763000  | -0.012628000 |
| C  | 2.438763000 | -2.438763000 | 0.012628000  |
| C  | 2.852416000 | 1.108052000  | -0.007190000 |
| C  | 2.852416000 | -1.108052000 | 0.007190000  |
| C  | 3.496097000 | 3.496097000  | -0.022725000 |
| C  | 3.496097000 | -3.496097000 | 0.022725000  |
| C  | 3.991486000 | 3.991486000  | -1.234789000 |
| C  | 3.991486000 | -3.991486000 | 1.234789000  |
| C  | 4.003383000 | 4.003383000  | 1.179455000  |
| C  | 4.003383000 | -4.003383000 | -1.179455000 |
| C  | 4.228743000 | 0.680663000  | -0.005013000 |
| C  | 4.228743000 | -0.680663000 | 0.005013000  |
| C  | 4.979096000 | 4.979096000  | -1.245597000 |

|   |              |              |              |
|---|--------------|--------------|--------------|
| C | 4.979096000  | -4.979096000 | 1.245597000  |
| C | 4.991006000  | 4.991006000  | 1.170773000  |
| C | 4.991006000  | -4.991006000 | -1.170773000 |
| C | 5.481144000  | 5.481144000  | -0.042308000 |
| C | 5.481144000  | -5.481144000 | 0.042308000  |
| C | -0.680663000 | 4.228743000  | 0.005013000  |
| C | -0.680663000 | -4.228743000 | -0.005013000 |
| C | -1.108052000 | 2.852416000  | 0.007190000  |
| C | -1.108052000 | -2.852416000 | -0.007190000 |
| C | -2.438763000 | 2.438763000  | 0.012628000  |
| C | -2.438763000 | -2.438763000 | -0.012628000 |
| C | -2.852416000 | 1.108052000  | 0.007190000  |
| C | -2.852416000 | -1.108052000 | -0.007190000 |
| C | -3.496097000 | 3.496097000  | 0.022725000  |
| C | -3.496097000 | -3.496097000 | -0.022725000 |
| C | -3.991486000 | 3.991486000  | 1.234789000  |
| C | -3.991486000 | -3.991486000 | -1.234789000 |
| C | -4.003383000 | 4.003383000  | -1.179455000 |
| C | -4.003383000 | -4.003383000 | 1.179455000  |
| C | -4.228743000 | 0.680663000  | 0.005013000  |
| C | -4.228743000 | -0.680663000 | -0.005013000 |
| C | -4.979096000 | 4.979096000  | 1.245597000  |
| C | -4.979096000 | -4.979096000 | -1.245597000 |
| C | -4.991006000 | 4.991006000  | -1.170773000 |
| C | -4.991006000 | -4.991006000 | 1.170773000  |
| C | -5.481144000 | 5.481144000  | 0.042308000  |
| C | -5.481144000 | -5.481144000 | -0.042308000 |
| H | 1.352018000  | 5.079247000  | -0.009795000 |
| H | 1.352018000  | -5.079247000 | 0.009795000  |
| H | 3.595108000  | 3.595108000  | -2.169256000 |
| H | 3.595108000  | -3.595108000 | 2.169256000  |
| H | 3.616240000  | 3.616240000  | 2.121609000  |
| H | 3.616240000  | -3.616240000 | -2.121609000 |
| H | 5.079247000  | 1.352018000  | -0.009795000 |
| H | 5.079247000  | -1.352018000 | 0.009795000  |
| H | 5.356144000  | 5.356144000  | -2.195482000 |
| H | 5.356144000  | -5.356144000 | 2.195482000  |
| H | 5.377391000  | 5.377391000  | 2.113090000  |
| H | 5.377391000  | -5.377391000 | -2.113090000 |
| H | 6.251565000  | 6.251565000  | -0.049898000 |
| H | 6.251565000  | -6.251565000 | 0.049898000  |
| H | -1.352018000 | 5.079247000  | 0.009795000  |
| H | -1.352018000 | -5.079247000 | -0.009795000 |
| H | -3.595108000 | 3.595108000  | 2.169256000  |
| H | -3.595108000 | -3.595108000 | -2.169256000 |
| H | -3.616240000 | 3.616240000  | -2.121609000 |
| H | -3.616240000 | -3.616240000 | 2.121609000  |
| H | -5.079247000 | 1.352018000  | 0.009795000  |
| H | -5.079247000 | -1.352018000 | -0.009795000 |
| H | -5.356144000 | 5.356144000  | 2.195482000  |
| H | -5.356144000 | -5.356144000 | -2.195482000 |

|   |              |              |              |
|---|--------------|--------------|--------------|
| H | -5.377391000 | 5.377391000  | -2.113090000 |
| H | -5.377391000 | -5.377391000 | 2.113090000  |
| H | -6.251565000 | 6.251565000  | 0.049898000  |
| H | -6.251565000 | -6.251565000 | -0.049898000 |
| N | 0.000000000  | 2.024295000  | 0.000000000  |
| N | 0.000000000  | -2.024295000 | 0.000000000  |
| N | 2.024295000  | 0.000000000  | 0.000000000  |
| N | -2.024295000 | 0.000000000  | 0.000000000  |

**89. Zn(TPP]; S = 0 (saddled)**

|    |              |              |              |
|----|--------------|--------------|--------------|
| Zn | 0.000000000  | 0.000000000  | 0.000000000  |
| C  | 0.000000000  | 3.459022000  | 0.000000000  |
| C  | 0.000000000  | 4.949751000  | 0.000000000  |
| C  | 0.000000000  | 7.764432000  | 0.000000000  |
| C  | 0.000000000  | -3.459022000 | 0.000000000  |
| C  | 0.000000000  | -4.949751000 | 0.000000000  |
| C  | 0.000000000  | -7.764432000 | 0.000000000  |
| C  | 0.578285000  | 5.665925000  | -1.058730000 |
| C  | 0.578285000  | -5.665925000 | 1.058730000  |
| C  | 0.578691000  | 7.061448000  | -1.059833000 |
| C  | 0.578691000  | -7.061448000 | 1.059833000  |
| C  | 1.245880000  | 2.810070000  | 0.032986000  |
| C  | 1.245880000  | -2.810070000 | -0.032986000 |
| C  | 2.517293000  | 3.481422000  | 0.162605000  |
| C  | 2.517293000  | -3.481422000 | -0.162605000 |
| C  | 2.810070000  | 1.245880000  | 0.032986000  |
| C  | 2.810070000  | -1.245880000 | -0.032986000 |
| C  | 3.459022000  | 0.000000000  | 0.000000000  |
| C  | 3.481422000  | 2.517293000  | 0.162605000  |
| C  | 3.481422000  | -2.517293000 | -0.162605000 |
| C  | 4.949751000  | 0.000000000  | 0.000000000  |
| C  | 5.665925000  | 0.578285000  | -1.058730000 |
| C  | 5.665925000  | -0.578285000 | 1.058730000  |
| C  | 7.061448000  | 0.578691000  | -1.059833000 |
| C  | 7.061448000  | -0.578691000 | 1.059833000  |
| C  | 7.764432000  | 0.000000000  | 0.000000000  |
| C  | -0.578285000 | 5.665925000  | 1.058730000  |
| C  | -0.578285000 | -5.665925000 | -1.058730000 |
| C  | -0.578691000 | 7.061448000  | 1.059833000  |
| C  | -0.578691000 | -7.061448000 | -1.059833000 |
| C  | -1.245880000 | 2.810070000  | -0.032986000 |
| C  | -1.245880000 | -2.810070000 | 0.032986000  |
| C  | -2.517293000 | 3.481422000  | -0.162605000 |
| C  | -2.517293000 | -3.481422000 | 0.162605000  |
| C  | -2.810070000 | 1.245880000  | -0.032986000 |
| C  | -2.810070000 | -1.245880000 | 0.032986000  |
| C  | -3.459022000 | 0.000000000  | 0.000000000  |
| C  | -3.481422000 | 2.517293000  | -0.162605000 |
| C  | -3.481422000 | -2.517293000 | 0.162605000  |

|   |              |              |              |
|---|--------------|--------------|--------------|
| C | -4.949751000 | 0.000000000  | 0.000000000  |
| C | -5.665925000 | 0.578285000  | 1.058730000  |
| C | -5.665925000 | -0.578285000 | -1.058730000 |
| C | -7.061448000 | 0.578691000  | 1.059833000  |
| C | -7.061448000 | -0.578691000 | -1.059833000 |
| C | -7.764432000 | 0.000000000  | 0.000000000  |
| H | 0.000000000  | 8.853922000  | 0.000000000  |
| H | 0.000000000  | -8.853922000 | 0.000000000  |
| H | 1.024249000  | 5.114843000  | -1.885906000 |
| H | 1.024249000  | -5.114843000 | 1.885906000  |
| H | 1.027250000  | 7.600336000  | -1.893495000 |
| H | 1.027250000  | -7.600336000 | 1.893495000  |
| H | 2.652913000  | 4.550975000  | 0.267465000  |
| H | 2.652913000  | -4.550975000 | -0.267465000 |
| H | 4.550975000  | 2.652913000  | 0.267465000  |
| H | 4.550975000  | -2.652913000 | -0.267465000 |
| H | 5.114843000  | 1.024249000  | -1.885906000 |
| H | 5.114843000  | -1.024249000 | 1.885906000  |
| H | 7.600336000  | 1.027250000  | -1.893495000 |
| H | 7.600336000  | -1.027250000 | 1.893495000  |
| H | 8.853922000  | 0.000000000  | 0.000000000  |
| H | -1.024249000 | 5.114843000  | 1.885906000  |
| H | -1.024249000 | -5.114843000 | -1.885906000 |
| H | -1.027250000 | 7.600336000  | 1.893495000  |
| H | -1.027250000 | -7.600336000 | -1.893495000 |
| H | -2.652913000 | 4.550975000  | -0.267465000 |
| H | -2.652913000 | -4.550975000 | 0.267465000  |
| H | -4.550975000 | 2.652913000  | -0.267465000 |
| H | -4.550975000 | -2.652913000 | 0.267465000  |
| H | -5.114843000 | 1.024249000  | 1.885906000  |
| H | -5.114843000 | -1.024249000 | -1.885906000 |
| H | -7.600336000 | 1.027250000  | 1.893495000  |
| H | -7.600336000 | -1.027250000 | -1.893495000 |
| H | -8.853922000 | 0.000000000  | 0.000000000  |
| N | 1.447878000  | 1.447878000  | -0.029455000 |
| N | 1.447878000  | -1.447878000 | 0.029455000  |
| N | -1.447878000 | 1.447878000  | 0.029455000  |
| N | -1.447878000 | -1.447878000 | -0.029455000 |

**90. Zn(TPP]; S = 0 (ruffled)**

|    |             |              |              |
|----|-------------|--------------|--------------|
| Zn | 0.000000000 | 0.000000000  | 0.000000000  |
| C  | 0.682283000 | 4.246927000  | -0.001831000 |
| C  | 0.682283000 | -4.246927000 | 0.001831000  |
| C  | 1.104765000 | 2.865577000  | -0.002626000 |
| C  | 1.104765000 | -2.865577000 | 0.002626000  |
| C  | 2.440541000 | 2.440541000  | -0.004597000 |
| C  | 2.440541000 | -2.440541000 | 0.004597000  |
| C  | 2.865577000 | 1.104765000  | -0.002626000 |
| C  | 2.865577000 | -1.104765000 | 0.002626000  |

|   |              |              |              |
|---|--------------|--------------|--------------|
| C | 3.498211000  | 3.498211000  | -0.008190000 |
| C | 3.498211000  | -3.498211000 | 0.008190000  |
| C | 3.998181000  | 3.998181000  | -1.216638000 |
| C | 3.998181000  | -3.998181000 | 1.216638000  |
| C | 4.002423000  | 4.002423000  | 1.196715000  |
| C | 4.002423000  | -4.002423000 | -1.196715000 |
| C | 4.246927000  | 0.682283000  | -0.001831000 |
| C | 4.246927000  | -0.682283000 | 0.001831000  |
| C | 4.985833000  | 4.985833000  | -1.221450000 |
| C | 4.985833000  | -4.985833000 | 1.221450000  |
| C | 4.990094000  | 4.990094000  | 1.194606000  |
| C | 4.990094000  | -4.990094000 | -1.194606000 |
| C | 5.484257000  | 5.484257000  | -0.015161000 |
| C | 5.484257000  | -5.484257000 | 0.015161000  |
| C | -0.682283000 | 4.246927000  | 0.001831000  |
| C | -0.682283000 | -4.246927000 | -0.001831000 |
| C | -1.104765000 | 2.865577000  | 0.002626000  |
| C | -1.104765000 | -2.865577000 | -0.002626000 |
| C | -2.440541000 | 2.440541000  | 0.004597000  |
| C | -2.440541000 | -2.440541000 | -0.004597000 |
| C | -2.865577000 | 1.104765000  | 0.002626000  |
| C | -2.865577000 | -1.104765000 | -0.002626000 |
| C | -3.498211000 | 3.498211000  | 0.008190000  |
| C | -3.498211000 | -3.498211000 | -0.008190000 |
| C | -3.998181000 | 3.998181000  | 1.216638000  |
| C | -3.998181000 | -3.998181000 | -1.216638000 |
| C | -4.002423000 | 4.002423000  | -1.196715000 |
| C | -4.002423000 | -4.002423000 | 1.196715000  |
| C | -4.246927000 | 0.682283000  | 0.001831000  |
| C | -4.246927000 | -0.682283000 | -0.001831000 |
| C | -4.985833000 | 4.985833000  | 1.221450000  |
| C | -4.985833000 | -4.985833000 | -1.221450000 |
| C | -4.990094000 | 4.990094000  | -1.194606000 |
| C | -4.990094000 | -4.990094000 | 1.194606000  |
| C | -5.484257000 | 5.484257000  | 0.015161000  |
| C | -5.484257000 | -5.484257000 | -0.015161000 |
| H | 1.349570000  | 5.101294000  | -0.003662000 |
| H | 1.349570000  | -5.101294000 | 0.003662000  |
| H | 3.605145000  | 3.605145000  | -2.153923000 |
| H | 3.605145000  | -3.605145000 | 2.153923000  |
| H | 3.612688000  | 3.612688000  | 2.136739000  |
| H | 3.612688000  | -3.612688000 | -2.136739000 |
| H | 5.101294000  | 1.349570000  | -0.003662000 |
| H | 5.101294000  | -1.349570000 | 0.003662000  |
| H | 5.365736000  | 5.365736000  | -2.169070000 |
| H | 5.365736000  | -5.365736000 | 2.169070000  |
| H | 5.373349000  | 5.373349000  | 2.139538000  |
| H | 5.373349000  | -5.373349000 | -2.139538000 |
| H | 6.254679000  | 6.254679000  | -0.017849000 |
| H | 6.254679000  | -6.254679000 | 0.017849000  |
| H | -1.349570000 | 5.101294000  | 0.003662000  |

|   |              |              |              |
|---|--------------|--------------|--------------|
| H | -1.349570000 | -5.101294000 | -0.003662000 |
| H | -3.605145000 | 3.605145000  | 2.153923000  |
| H | -3.605145000 | -3.605145000 | -2.153923000 |
| H | -3.612688000 | 3.612688000  | -2.136739000 |
| H | -3.612688000 | -3.612688000 | 2.136739000  |
| H | -5.101294000 | 1.349570000  | 0.003662000  |
| H | -5.101294000 | -1.349570000 | -0.003662000 |
| H | -5.365736000 | 5.365736000  | 2.169070000  |
| H | -5.365736000 | -5.365736000 | -2.169070000 |
| H | -5.373349000 | 5.373349000  | -2.139538000 |
| H | -5.373349000 | -5.373349000 | 2.139538000  |
| H | -6.254679000 | 6.254679000  | 0.017849000  |
| H | -6.254679000 | -6.254679000 | -0.017849000 |
| N | 0.000000000  | 2.042671000  | 0.000000000  |
| N | 0.000000000  | -2.042671000 | 0.000000000  |
| N | 2.042671000  | 0.000000000  | 0.000000000  |
| N | -2.042671000 | 0.000000000  | 0.000000000  |

**91. Cu(I<sub>8</sub>TPP] ; S = ½ (saddled)**

|    |              |              |              |
|----|--------------|--------------|--------------|
| Cu | 0.000000000  | 0.000000000  | 0.000000000  |
| C  | 0.000000000  | 3.391355000  | 0.000000000  |
| C  | 0.000000000  | 4.870805000  | 0.000000000  |
| C  | 0.000000000  | 7.670509000  | 0.000000000  |
| C  | 0.000000000  | -3.391355000 | 0.000000000  |
| C  | 0.000000000  | -4.870805000 | 0.000000000  |
| C  | 0.000000000  | -7.670509000 | 0.000000000  |
| C  | 0.965343000  | 6.971221000  | -0.729577000 |
| C  | 0.965343000  | -6.971221000 | 0.729577000  |
| C  | 0.972222000  | 5.579246000  | -0.720172000 |
| C  | 0.972222000  | -5.579246000 | 0.720172000  |
| C  | 1.127364000  | 2.704112000  | 0.489683000  |
| C  | 1.127364000  | -2.704112000 | -0.489683000 |
| C  | 2.238317000  | 3.215370000  | 1.273915000  |
| C  | 2.238317000  | -3.215370000 | -1.273915000 |
| C  | 2.704112000  | 1.127364000  | 0.489683000  |
| C  | 2.704112000  | -1.127364000 | -0.489683000 |
| C  | 3.215370000  | 2.238317000  | 1.273915000  |
| C  | 3.215370000  | -2.238317000 | -1.273915000 |
| C  | 3.391355000  | 0.000000000  | 0.000000000  |
| C  | 4.870805000  | 0.000000000  | 0.000000000  |
| C  | 5.579246000  | 0.972222000  | -0.720172000 |
| C  | 5.579246000  | -0.972222000 | 0.720172000  |
| C  | 6.971221000  | 0.965343000  | -0.729577000 |
| C  | 6.971221000  | -0.965343000 | 0.729577000  |
| C  | 7.670509000  | 0.000000000  | 0.000000000  |
| C  | -0.965343000 | 6.971221000  | 0.729577000  |
| C  | -0.965343000 | -6.971221000 | -0.729577000 |
| C  | -0.972222000 | 5.579246000  | 0.720172000  |
| C  | -0.972222000 | -5.579246000 | -0.720172000 |



|   |              |              |              |
|---|--------------|--------------|--------------|
| C | -1.127364000 | 2.704112000  | -0.489683000 |
| C | -1.127364000 | -2.704112000 | 0.489683000  |
| C | -2.238317000 | 3.215370000  | -1.273915000 |
| C | -2.238317000 | -3.215370000 | 1.273915000  |
| C | -2.704112000 | 1.127364000  | -0.489683000 |
| C | -2.704112000 | -1.127364000 | 0.489683000  |
| C | -3.215370000 | 2.238317000  | -1.273915000 |
| C | -3.215370000 | -2.238317000 | 1.273915000  |
| C | -3.391355000 | 0.000000000  | 0.000000000  |
| C | -4.870805000 | 0.000000000  | 0.000000000  |
| C | -5.579246000 | 0.972222000  | 0.720172000  |
| C | -5.579246000 | -0.972222000 | -0.720172000 |
| C | -6.971221000 | 0.965343000  | 0.729577000  |
| C | -6.971221000 | -0.965343000 | -0.729577000 |
| C | -7.670509000 | 0.000000000  | 0.000000000  |
| H | 0.000000000  | 8.760070000  | 0.000000000  |
| H | 0.000000000  | -8.760070000 | 0.000000000  |
| H | 1.717578000  | 7.512598000  | -1.301155000 |
| H | 1.717578000  | -7.512598000 | 1.301155000  |
| H | 1.724186000  | 5.024565000  | -1.279682000 |
| H | 1.724186000  | -5.024565000 | 1.279682000  |
| H | 5.024565000  | 1.724186000  | -1.279682000 |
| H | 5.024565000  | -1.724186000 | 1.279682000  |
| H | 7.512598000  | 1.717578000  | -1.301155000 |
| H | 7.512598000  | -1.717578000 | 1.301155000  |
| H | 8.760070000  | 0.000000000  | 0.000000000  |
| H | -1.717578000 | 7.512598000  | 1.301155000  |
| H | -1.717578000 | -7.512598000 | -1.301155000 |
| H | -1.724186000 | 5.024565000  | 1.279682000  |
| H | -1.724186000 | -5.024565000 | -1.279682000 |
| H | -5.024565000 | 1.724186000  | 1.279682000  |
| H | -5.024565000 | -1.724186000 | -1.279682000 |
| H | -7.512598000 | 1.717578000  | 1.301155000  |
| H | -7.512598000 | -1.717578000 | -1.301155000 |
| H | -8.760070000 | 0.000000000  | 0.000000000  |
| I | 2.284179000  | 4.946826000  | 2.450327000  |
| I | 2.284179000  | -4.946826000 | -2.450327000 |
| I | 4.946826000  | 2.284179000  | 2.450327000  |
| I | 4.946826000  | -2.284179000 | -2.450327000 |
| I | -2.284179000 | 4.946826000  | -2.450327000 |
| I | -2.284179000 | -4.946826000 | 2.450327000  |
| I | -4.946826000 | 2.284179000  | -2.450327000 |
| I | -4.946826000 | -2.284179000 | 2.450327000  |
| N | 1.401628000  | 1.401628000  | 0.133829000  |
| N | 1.401628000  | -1.401628000 | -0.133829000 |
| N | -1.401628000 | 1.401628000  | -0.133829000 |
| N | -1.401628000 | -1.401628000 | 0.133829000  |

92. Cu(I<sub>8</sub>TPP]; S = ½ (ruffled)

|    |              |              |              |
|----|--------------|--------------|--------------|
| Cu | 0.000000000  | 0.000000000  | 0.000000000  |
| C  | 0.569342000  | 4.139799000  | -0.391757000 |
| C  | 0.569342000  | -4.139799000 | 0.391757000  |
| C  | 0.996695000  | 2.749965000  | -0.522324000 |
| C  | 0.996695000  | -2.749965000 | 0.522324000  |
| C  | 2.280655000  | 2.280655000  | -0.874038000 |
| C  | 2.280655000  | -2.280655000 | 0.874038000  |
| C  | 2.749965000  | 0.996695000  | -0.522324000 |
| C  | 2.749965000  | -0.996695000 | 0.522324000  |
| C  | 3.249494000  | 3.249494000  | -1.460105000 |
| C  | 3.249494000  | -3.249494000 | 1.460105000  |
| C  | 3.370012000  | 3.370012000  | -2.847604000 |
| C  | 3.370012000  | -3.370012000 | 2.847604000  |
| C  | 4.045217000  | 4.045217000  | -0.626343000 |
| C  | 4.045217000  | -4.045217000 | 0.626343000  |
| C  | 4.139799000  | 0.569342000  | -0.391757000 |
| C  | 4.139799000  | -0.569342000 | 0.391757000  |
| C  | 4.276344000  | 4.276344000  | -3.395953000 |
| C  | 4.276344000  | -4.276344000 | 3.395953000  |
| C  | 4.950759000  | 4.950759000  | -1.173129000 |
| C  | 4.950759000  | -4.950759000 | 1.173129000  |
| C  | 5.067794000  | 5.067794000  | -2.559658000 |
| C  | 5.067794000  | -5.067794000 | 2.559658000  |
| C  | -0.569342000 | 4.139799000  | 0.391757000  |
| C  | -0.569342000 | -4.139799000 | -0.391757000 |
| C  | -0.996695000 | 2.749965000  | 0.522324000  |
| C  | -0.996695000 | -2.749965000 | -0.522324000 |
| C  | -2.280655000 | 2.280655000  | 0.874038000  |
| C  | -2.280655000 | -2.280655000 | -0.874038000 |
| C  | -2.749965000 | 0.996695000  | 0.522324000  |
| C  | -2.749965000 | -0.996695000 | -0.522324000 |
| C  | -3.249494000 | 3.249494000  | 1.460105000  |
| C  | -3.249494000 | -3.249494000 | -1.460105000 |
| C  | -3.370012000 | 3.370012000  | 2.847604000  |
| C  | -3.370012000 | -3.370012000 | -2.847604000 |
| C  | -4.045217000 | 4.045217000  | 0.626343000  |
| C  | -4.045217000 | -4.045217000 | -0.626343000 |
| C  | -4.139799000 | 0.569342000  | 0.391757000  |
| C  | -4.139799000 | -0.569342000 | -0.391757000 |
| C  | -4.276344000 | 4.276344000  | 3.395953000  |
| C  | -4.276344000 | -4.276344000 | -3.395953000 |
| C  | -4.950759000 | 4.950759000  | 1.173129000  |
| C  | -4.950759000 | -4.950759000 | -1.173129000 |
| C  | -5.067794000 | 5.067794000  | 2.559658000  |
| C  | -5.067794000 | -5.067794000 | -2.559658000 |
| H  | 2.749342000  | 2.749342000  | -3.492276000 |
| H  | 2.749342000  | -2.749342000 | 3.492276000  |
| H  | 3.944898000  | 3.944898000  | 0.453463000  |

|   |              |              |              |
|---|--------------|--------------|--------------|
| H | 3.944898000  | -3.944898000 | -0.453463000 |
| H | 4.365131000  | 4.365131000  | -4.477660000 |
| H | 4.365131000  | -4.365131000 | 4.477660000  |
| H | 5.564891000  | 5.564891000  | -0.516704000 |
| H | 5.564891000  | -5.564891000 | 0.516704000  |
| H | 5.775675000  | 5.775675000  | -2.989784000 |
| H | 5.775675000  | -5.775675000 | 2.989784000  |
| H | -2.749342000 | 2.749342000  | 3.492276000  |
| H | -2.749342000 | -2.749342000 | -3.492276000 |
| H | -3.944898000 | 3.944898000  | -0.453463000 |
| H | -3.944898000 | -3.944898000 | 0.453463000  |
| H | -4.365131000 | 4.365131000  | 4.477660000  |
| H | -4.365131000 | -4.365131000 | -4.477660000 |
| H | -5.564891000 | 5.564891000  | 0.516704000  |
| H | -5.564891000 | -5.564891000 | -0.516704000 |
| H | -5.775675000 | 5.775675000  | 2.989784000  |
| H | -5.775675000 | -5.775675000 | -2.989784000 |
| I | 1.284597000  | 5.887364000  | -1.308786000 |
| I | 1.284597000  | -5.887364000 | 1.308786000  |
| I | 5.887364000  | 1.284597000  | -1.308786000 |
| I | 5.887364000  | -1.284597000 | 1.308786000  |
| I | -1.284597000 | 5.887364000  | 1.308786000  |
| I | -1.284597000 | -5.887364000 | -1.308786000 |
| I | -5.887364000 | 1.284597000  | 1.308786000  |
| I | -5.887364000 | -1.284597000 | -1.308786000 |
| N | 0.000000000  | 1.954777000  | 0.000000000  |
| N | 0.000000000  | -1.954777000 | 0.000000000  |
| N | 1.954777000  | 0.000000000  | 0.000000000  |
| N | -1.954777000 | 0.000000000  | 0.000000000  |

**93. Ni (I<sub>8</sub>TPP] ; S = 0 (saddled)**

|    |             |              |              |
|----|-------------|--------------|--------------|
| Ni | 0.000000000 | 0.000000000  | 0.000000000  |
| C  | 0.000000000 | 3.351965000  | 0.000000000  |
| C  | 0.000000000 | 4.832573000  | 0.000000000  |
| C  | 0.000000000 | 7.631649000  | 0.000000000  |
| C  | 0.000000000 | -3.351965000 | 0.000000000  |
| C  | 0.000000000 | -4.832573000 | 0.000000000  |
| C  | 0.000000000 | -7.631649000 | 0.000000000  |
| C  | 0.986546000 | 6.932319000  | -0.700384000 |
| C  | 0.986546000 | -6.932319000 | 0.700384000  |
| C  | 0.992323000 | 5.539964000  | -0.691784000 |
| C  | 0.992323000 | -5.539964000 | 0.691784000  |
| C  | 1.075902000 | 2.649841000  | 0.556809000  |
| C  | 1.075902000 | -2.649841000 | -0.556809000 |
| C  | 2.176977000 | 3.151823000  | 1.356846000  |
| C  | 2.176977000 | -3.151823000 | -1.356846000 |
| C  | 2.649841000 | 1.075902000  | 0.556809000  |
| C  | 2.649841000 | -1.075902000 | -0.556809000 |
| C  | 3.151823000 | 2.176977000  | 1.356846000  |

|   |              |              |              |
|---|--------------|--------------|--------------|
| C | 3.151823000  | -2.176977000 | -1.356846000 |
| C | 3.351965000  | 0.000000000  | 0.000000000  |
| C | 4.832573000  | 0.000000000  | 0.000000000  |
| C | 5.539964000  | 0.992323000  | -0.691784000 |
| C | 5.539964000  | -0.992323000 | 0.691784000  |
| C | 6.932319000  | 0.986546000  | -0.700384000 |
| C | 6.932319000  | -0.986546000 | 0.700384000  |
| C | 7.631649000  | 0.000000000  | 0.000000000  |
| C | -0.986546000 | 6.932319000  | 0.700384000  |
| C | -0.986546000 | -6.932319000 | -0.700384000 |
| C | -0.992323000 | 5.539964000  | 0.691784000  |
| C | -0.992323000 | -5.539964000 | -0.691784000 |
| C | -1.075902000 | 2.649841000  | -0.556809000 |
| C | -1.075902000 | -2.649841000 | 0.556809000  |
| C | -2.176977000 | 3.151823000  | -1.356846000 |
| C | -2.176977000 | -3.151823000 | 1.356846000  |
| C | -2.649841000 | 1.075902000  | -0.556809000 |
| C | -2.649841000 | -1.075902000 | 0.556809000  |
| C | -3.151823000 | 2.176977000  | -1.356846000 |
| C | -3.151823000 | -2.176977000 | 1.356846000  |
| C | -3.351965000 | 0.000000000  | 0.000000000  |
| C | -4.832573000 | 0.000000000  | 0.000000000  |
| C | -5.539964000 | 0.992323000  | 0.691784000  |
| C | -5.539964000 | -0.992323000 | -0.691784000 |
| C | -6.932319000 | 0.986546000  | 0.700384000  |
| C | -6.932319000 | -0.986546000 | -0.700384000 |
| C | -7.631649000 | 0.000000000  | 0.000000000  |
| H | 0.000000000  | 8.721185000  | 0.000000000  |
| H | 0.000000000  | -8.721185000 | 0.000000000  |
| H | 1.755740000  | 7.473613000  | -1.248986000 |
| H | 1.755740000  | -7.473613000 | 1.248986000  |
| H | 1.760564000  | 4.985118000  | -1.228614000 |
| H | 1.760564000  | -4.985118000 | 1.228614000  |
| H | 4.985118000  | 1.760564000  | -1.228614000 |
| H | 4.985118000  | -1.760564000 | 1.228614000  |
| H | 7.473613000  | 1.755740000  | -1.248986000 |
| H | 7.473613000  | -1.755740000 | 1.248986000  |
| H | 8.721185000  | 0.000000000  | 0.000000000  |
| H | -1.755740000 | 7.473613000  | 1.248986000  |
| H | -1.755740000 | -7.473613000 | -1.248986000 |
| H | -1.760564000 | 4.985118000  | 1.228614000  |
| H | -1.760564000 | -4.985118000 | -1.228614000 |
| H | -4.985118000 | 1.760564000  | 1.228614000  |
| H | -4.985118000 | -1.760564000 | -1.228614000 |
| H | -7.473613000 | 1.755740000  | 1.248986000  |
| H | -7.473613000 | -1.755740000 | -1.248986000 |
| H | -8.721185000 | 0.000000000  | 0.000000000  |
| I | 2.202796000  | 4.881422000  | 2.531861000  |
| I | 2.202796000  | -4.881422000 | -2.531861000 |
| I | 4.881422000  | 2.202796000  | 2.531861000  |
| I | 4.881422000  | -2.202796000 | -2.531861000 |

|   |              |              |              |
|---|--------------|--------------|--------------|
| I | -2.202796000 | 4.881422000  | -2.531861000 |
| I | -2.202796000 | -4.881422000 | 2.531861000  |
| I | -4.881422000 | 2.202796000  | -2.531861000 |
| I | -4.881422000 | -2.202796000 | 2.531861000  |
| N | 1.332467000  | 1.332467000  | 0.219060000  |
| N | 1.332467000  | -1.332467000 | -0.219060000 |
| N | -1.332467000 | 1.332467000  | -0.219060000 |
| N | -1.332467000 | -1.332467000 | 0.219060000  |

**94. Ni(I<sub>8</sub>TPP]; S = 0 (ruffled)**

|    |              |              |              |
|----|--------------|--------------|--------------|
| Ni | 0.000000000  | 0.000000000  | 0.000000000  |
| C  | 0.531034000  | 4.062327000  | -0.440550000 |
| C  | 0.531034000  | -4.062327000 | 0.440550000  |
| C  | 0.948796000  | 2.675390000  | -0.601442000 |
| C  | 0.948796000  | -2.675390000 | 0.601442000  |
| C  | 2.212020000  | 2.212020000  | -1.010474000 |
| C  | 2.212020000  | -2.212020000 | 1.010474000  |
| C  | 2.675390000  | 0.948796000  | -0.601442000 |
| C  | 2.675390000  | -0.948796000 | 0.601442000  |
| C  | 3.153708000  | 3.153708000  | -1.675724000 |
| C  | 3.153708000  | -3.153708000 | 1.675724000  |
| C  | 3.215855000  | 3.215855000  | -3.070668000 |
| C  | 3.215855000  | -3.215855000 | 3.070668000  |
| C  | 3.983295000  | 3.983295000  | -0.910324000 |
| C  | 3.983295000  | -3.983295000 | 0.910324000  |
| C  | 4.062327000  | 0.531034000  | -0.440550000 |
| C  | 4.062327000  | -0.531034000 | 0.440550000  |
| C  | 4.097896000  | 4.097896000  | -3.694013000 |
| C  | 4.097896000  | -4.097896000 | 3.694013000  |
| C  | 4.864287000  | 4.864287000  | -1.531747000 |
| C  | 4.864287000  | -4.864287000 | 1.531747000  |
| C  | 4.923089000  | 4.923089000  | -2.925657000 |
| C  | 4.923089000  | -4.923089000 | 2.925657000  |
| C  | -0.531034000 | 4.062327000  | 0.440550000  |
| C  | -0.531034000 | -4.062327000 | -0.440550000 |
| C  | -0.948796000 | 2.675390000  | 0.601442000  |
| C  | -0.948796000 | -2.675390000 | -0.601442000 |
| C  | -2.212020000 | 2.212020000  | 1.010474000  |
| C  | -2.212020000 | -2.212020000 | -1.010474000 |
| C  | -2.675390000 | 0.948796000  | 0.601442000  |
| C  | -2.675390000 | -0.948796000 | -0.601442000 |
| C  | -3.153708000 | 3.153708000  | 1.675724000  |
| C  | -3.153708000 | -3.153708000 | -1.675724000 |
| C  | -3.215855000 | 3.215855000  | 3.070668000  |
| C  | -3.215855000 | -3.215855000 | -3.070668000 |
| C  | -3.983295000 | 3.983295000  | 0.910324000  |
| C  | -3.983295000 | -3.983295000 | -0.910324000 |
| C  | -4.062327000 | 0.531034000  | 0.440550000  |
| C  | -4.062327000 | -0.531034000 | -0.440550000 |

|   |              |              |              |
|---|--------------|--------------|--------------|
| C | -4.097896000 | 4.097896000  | 3.694013000  |
| C | -4.097896000 | -4.097896000 | -3.694013000 |
| C | -4.864287000 | 4.864287000  | 1.531747000  |
| C | -4.864287000 | -4.864287000 | -1.531747000 |
| C | -4.923089000 | 4.923089000  | 2.925657000  |
| C | -4.923089000 | -4.923089000 | -2.925657000 |
| H | 2.569244000  | 2.569244000  | -3.662138000 |
| H | 2.569244000  | -2.569244000 | 3.662138000  |
| H | 3.928390000  | 3.928390000  | 0.176020000  |
| H | 3.928390000  | -3.928390000 | -0.176020000 |
| H | 4.141213000  | 4.141213000  | -4.781280000 |
| H | 4.141213000  | -4.141213000 | 4.781280000  |
| H | 5.504764000  | 5.504764000  | -0.927750000 |
| H | 5.504764000  | -5.504764000 | 0.927750000  |
| H | 5.611642000  | 5.611642000  | -3.414525000 |
| H | 5.611642000  | -5.611642000 | 3.414525000  |
| H | -2.569244000 | 2.569244000  | 3.662138000  |
| H | -2.569244000 | -2.569244000 | -3.662138000 |
| H | -3.928390000 | 3.928390000  | -0.176020000 |
| H | -3.928390000 | -3.928390000 | 0.176020000  |
| H | -4.141213000 | 4.141213000  | 4.781280000  |
| H | -4.141213000 | -4.141213000 | -4.781280000 |
| H | -5.504764000 | 5.504764000  | 0.927750000  |
| H | -5.504764000 | -5.504764000 | -0.927750000 |
| H | -5.611642000 | 5.611642000  | 3.414525000  |
| H | -5.611642000 | -5.611642000 | -3.414525000 |
| I | 1.173930000  | 5.792971000  | -1.432247000 |
| I | 1.173930000  | -5.792971000 | 1.432247000  |
| I | 5.792971000  | 1.173930000  | -1.432247000 |
| I | 5.792971000  | -1.173930000 | 1.432247000  |
| I | -1.173930000 | 5.792971000  | 1.432247000  |
| I | -1.173930000 | -5.792971000 | -1.432247000 |
| I | -5.792971000 | 1.173930000  | 1.432247000  |
| I | -5.792971000 | -1.173930000 | -1.432247000 |
| N | 0.000000000  | 1.872522000  | 0.000000000  |
| N | 0.000000000  | -1.872522000 | 0.000000000  |
| N | 1.872522000  | 0.000000000  | 0.000000000  |
| N | -1.872522000 | 0.000000000  | 0.000000000  |

**95. Pd(I<sub>8</sub>TPP]; S = 0 (saddled)**

|    |             |              |              |
|----|-------------|--------------|--------------|
| Pd | 0.000000000 | 0.000000000  | 0.000000000  |
| C  | 0.000000000 | 3.404352000  | 0.000000000  |
| C  | 0.000000000 | 4.885655000  | 0.000000000  |
| C  | 0.000000000 | 7.684202000  | 0.000000000  |
| C  | 0.000000000 | -3.404352000 | 0.000000000  |
| C  | 0.000000000 | -4.885655000 | 0.000000000  |
| C  | 0.000000000 | -7.684202000 | 0.000000000  |
| C  | 0.936132000 | 6.985097000  | -0.766739000 |
| C  | 0.936132000 | -6.985097000 | 0.766739000  |

|   |              |              |              |
|---|--------------|--------------|--------------|
| C | 0.943321000  | 5.593024000  | -0.757509000 |
| C | 0.943321000  | -5.593024000 | 0.757509000  |
| C | 1.141166000  | 2.728506000  | 0.469817000  |
| C | 1.141166000  | -2.728506000 | -0.469817000 |
| C | 2.271190000  | 3.247470000  | 1.225364000  |
| C | 2.271190000  | -3.247470000 | -1.225364000 |
| C | 2.728506000  | 1.141166000  | 0.469817000  |
| C | 2.728506000  | -1.141166000 | -0.469817000 |
| C | 3.247470000  | 2.271190000  | 1.225364000  |
| C | 3.247470000  | -2.271190000 | -1.225364000 |
| C | 3.404352000  | 0.000000000  | 0.000000000  |
| C | 4.885655000  | 0.000000000  | 0.000000000  |
| C | 5.593024000  | 0.943321000  | -0.757509000 |
| C | 5.593024000  | -0.943321000 | 0.757509000  |
| C | 6.985097000  | 0.936132000  | -0.766739000 |
| C | 6.985097000  | -0.936132000 | 0.766739000  |
| C | 7.684202000  | 0.000000000  | 0.000000000  |
| C | -0.936132000 | 6.985097000  | 0.766739000  |
| C | -0.936132000 | -6.985097000 | -0.766739000 |
| C | -0.943321000 | 5.593024000  | 0.757509000  |
| C | -0.943321000 | -5.593024000 | -0.757509000 |
| C | -1.141166000 | 2.728506000  | -0.469817000 |
| C | -1.141166000 | -2.728506000 | 0.469817000  |
| C | -2.271190000 | 3.247470000  | -1.225364000 |
| C | -2.271190000 | -3.247470000 | 1.225364000  |
| C | -2.728506000 | 1.141166000  | -0.469817000 |
| C | -2.728506000 | -1.141166000 | 0.469817000  |
| C | -3.247470000 | 2.271190000  | -1.225364000 |
| C | -3.247470000 | -2.271190000 | 1.225364000  |
| C | -3.404352000 | 0.000000000  | 0.000000000  |
| C | -4.885655000 | 0.000000000  | 0.000000000  |
| C | -5.593024000 | 0.943321000  | 0.757509000  |
| C | -5.593024000 | -0.943321000 | -0.757509000 |
| C | -6.985097000 | 0.936132000  | 0.766739000  |
| C | -6.985097000 | -0.936132000 | -0.766739000 |
| C | -7.684202000 | 0.000000000  | 0.000000000  |
| H | 0.000000000  | 8.773770000  | 0.000000000  |
| H | 0.000000000  | -8.773770000 | 0.000000000  |
| H | 1.665517000  | 7.526502000  | -1.367099000 |
| H | 1.665517000  | -7.526502000 | 1.367099000  |
| H | 1.673036000  | 5.037897000  | -1.345247000 |
| H | 1.673036000  | -5.037897000 | 1.345247000  |
| H | 5.037897000  | 1.673036000  | -1.345247000 |
| H | 5.037897000  | -1.673036000 | 1.345247000  |
| H | 7.526502000  | 1.665517000  | -1.367099000 |
| H | 7.526502000  | -1.665517000 | 1.367099000  |
| H | 8.773770000  | 0.000000000  | 0.000000000  |
| H | -1.665517000 | 7.526502000  | 1.367099000  |
| H | -1.665517000 | -7.526502000 | -1.367099000 |
| H | -1.673036000 | 5.037897000  | 1.345247000  |
| H | -1.673036000 | -5.037897000 | -1.345247000 |

|   |              |              |              |
|---|--------------|--------------|--------------|
| H | -5.037897000 | 1.673036000  | 1.345247000  |
| H | -5.037897000 | -1.673036000 | -1.345247000 |
| H | -7.526502000 | 1.665517000  | 1.367099000  |
| H | -7.526502000 | -1.665517000 | -1.367099000 |
| H | -8.773770000 | 0.000000000  | 0.000000000  |
| I | 2.341673000  | 4.994847000  | 2.376183000  |
| I | 2.341673000  | -4.994847000 | -2.376183000 |
| I | 4.994847000  | 2.341673000  | 2.376183000  |
| I | 4.994847000  | -2.341673000 | -2.376183000 |
| I | -2.341673000 | 4.994847000  | -2.376183000 |
| I | -2.341673000 | -4.994847000 | 2.376183000  |
| I | -4.994847000 | 2.341673000  | -2.376183000 |
| I | -4.994847000 | -2.341673000 | 2.376183000  |
| N | 1.418713000  | 1.418713000  | 0.132745000  |
| N | 1.418713000  | -1.418713000 | -0.132745000 |
| N | -1.418713000 | 1.418713000  | -0.132745000 |
| N | -1.418713000 | -1.418713000 | 0.132745000  |

**96. Pd(I<sub>8</sub>TPP]; S = 0 (ruffled)**

|    |              |              |              |
|----|--------------|--------------|--------------|
| Pd | 0.000000000  | 0.000000000  | 0.000000000  |
| C  | 0.590525000  | 4.181422000  | -0.357417000 |
| C  | 0.590525000  | -4.181422000 | 0.357417000  |
| C  | 1.027147000  | 2.790293000  | -0.472496000 |
| C  | 1.027147000  | -2.790293000 | 0.472496000  |
| C  | 2.320708000  | 2.320708000  | -0.784947000 |
| C  | 2.320708000  | -2.320708000 | 0.784947000  |
| C  | 2.790293000  | 1.027147000  | -0.472496000 |
| C  | 2.790293000  | -1.027147000 | 0.472496000  |
| C  | 3.305660000  | 3.305660000  | -1.316739000 |
| C  | 3.305660000  | -3.305660000 | 1.316739000  |
| C  | 3.463903000  | 3.463903000  | -2.696695000 |
| C  | 3.463903000  | -3.463903000 | 2.696695000  |
| C  | 4.077365000  | 4.077365000  | -0.439477000 |
| C  | 4.077365000  | -4.077365000 | 0.439477000  |
| C  | 4.181422000  | 0.590525000  | -0.357417000 |
| C  | 4.181422000  | -0.590525000 | 0.357417000  |
| C  | 4.384490000  | 4.384490000  | -3.194681000 |
| C  | 4.384490000  | -4.384490000 | 3.194681000  |
| C  | 4.997300000  | 4.997300000  | -0.936122000 |
| C  | 4.997300000  | -4.997300000 | 0.936122000  |
| C  | 5.152226000  | 5.152226000  | -2.315249000 |
| C  | 5.152226000  | -5.152226000 | 2.315249000  |
| C  | -0.590525000 | 4.181422000  | 0.357417000  |
| C  | -0.590525000 | -4.181422000 | -0.357417000 |
| C  | -1.027147000 | 2.790293000  | 0.472496000  |
| C  | -1.027147000 | -2.790293000 | -0.472496000 |
| C  | -2.320708000 | 2.320708000  | 0.784947000  |
| C  | -2.320708000 | -2.320708000 | -0.784947000 |
| C  | -2.790293000 | 1.027147000  | 0.472496000  |



|   |              |              |              |
|---|--------------|--------------|--------------|
| C | -2.790293000 | -1.027147000 | -0.472496000 |
| C | -3.305660000 | 3.305660000  | 1.316739000  |
| C | -3.305660000 | -3.305660000 | -1.316739000 |
| C | -3.463903000 | 3.463903000  | 2.696695000  |
| C | -3.463903000 | -3.463903000 | -2.696695000 |
| C | -4.077365000 | 4.077365000  | 0.439477000  |
| C | -4.077365000 | -4.077365000 | -0.439477000 |
| C | -4.181422000 | 0.590525000  | 0.357417000  |
| C | -4.181422000 | -0.590525000 | -0.357417000 |
| C | -4.384490000 | 4.384490000  | 3.194681000  |
| C | -4.384490000 | -4.384490000 | -3.194681000 |
| C | -4.997300000 | 4.997300000  | 0.936122000  |
| C | -4.997300000 | -4.997300000 | -0.936122000 |
| C | -5.152226000 | 5.152226000  | 2.315249000  |
| C | -5.152226000 | -5.152226000 | -2.315249000 |
| H | 2.861143000  | 2.861143000  | -3.374442000 |
| H | 2.861143000  | -2.861143000 | 3.374442000  |
| H | 3.947262000  | 3.947262000  | 0.633924000  |
| H | 3.947262000  | -3.947262000 | -0.633924000 |
| H | 4.503065000  | 4.503065000  | -4.270568000 |
| H | 4.503065000  | -4.503065000 | 4.270568000  |
| H | 5.592989000  | 5.592989000  | -0.246615000 |
| H | 5.592989000  | -5.592989000 | 0.246615000  |
| H | 5.871416000  | 5.871416000  | -2.706059000 |
| H | 5.871416000  | -5.871416000 | 2.706059000  |
| H | -2.861143000 | 2.861143000  | 3.374442000  |
| H | -2.861143000 | -2.861143000 | -3.374442000 |
| H | -3.947262000 | 3.947262000  | -0.633924000 |
| H | -3.947262000 | -3.947262000 | 0.633924000  |
| H | -4.503065000 | 4.503065000  | 4.270568000  |
| H | -4.503065000 | -4.503065000 | -4.270568000 |
| H | -5.592989000 | 5.592989000  | 0.246615000  |
| H | -5.592989000 | -5.592989000 | -0.246615000 |
| H | -5.871416000 | 5.871416000  | 2.706059000  |
| H | -5.871416000 | -5.871416000 | -2.706059000 |
| I | 1.357754000  | 5.935927000  | -1.216319000 |
| I | 1.357754000  | -5.935927000 | 1.216319000  |
| I | 5.935927000  | 1.357754000  | -1.216319000 |
| I | 5.935927000  | -1.357754000 | 1.216319000  |
| I | -1.357754000 | 5.935927000  | 1.216319000  |
| I | -1.357754000 | -5.935927000 | -1.216319000 |
| I | -5.935927000 | 1.357754000  | 1.216319000  |
| I | -5.935927000 | -1.357754000 | -1.216319000 |
| N | 0.000000000  | 1.999111000  | 0.000000000  |
| N | 0.000000000  | -1.999111000 | 0.000000000  |
| N | 1.999111000  | 0.000000000  | 0.000000000  |
| N | -1.999111000 | 0.000000000  | 0.000000000  |

97. Pt(I<sub>8</sub>TPP]; S = 0 (saddled)

|    |              |              |              |
|----|--------------|--------------|--------------|
| Pt | 0.000000000  | 0.000000000  | 0.000000000  |
| C  | 0.000000000  | 3.406586000  | 0.000000000  |
| C  | 0.000000000  | 4.889677000  | 0.000000000  |
| C  | 0.000000000  | 7.687884000  | 0.000000000  |
| C  | 0.000000000  | -3.406586000 | 0.000000000  |
| C  | 0.000000000  | -4.889677000 | 0.000000000  |
| C  | 0.000000000  | -7.687884000 | 0.000000000  |
| C  | 0.913005000  | 6.988815000  | -0.794039000 |
| C  | 0.913005000  | -6.988815000 | 0.794039000  |
| C  | 0.920010000  | 5.596616000  | -0.785486000 |
| C  | 0.920010000  | -5.596616000 | 0.785486000  |
| C  | 1.144719000  | 2.735711000  | 0.467747000  |
| C  | 1.144719000  | -2.735711000 | -0.467747000 |
| C  | 2.289107000  | 3.264726000  | 1.192737000  |
| C  | 2.289107000  | -3.264726000 | -1.192737000 |
| C  | 2.735711000  | 1.144719000  | 0.467747000  |
| C  | 2.735711000  | -1.144719000 | -0.467747000 |
| C  | 3.264726000  | 2.289107000  | 1.192737000  |
| C  | 3.264726000  | -2.289107000 | -1.192737000 |
| C  | 3.406586000  | 0.000000000  | 0.000000000  |
| C  | 4.889677000  | 0.000000000  | 0.000000000  |
| C  | 5.596616000  | 0.920010000  | -0.785486000 |
| C  | 5.596616000  | -0.920010000 | 0.785486000  |
| C  | 6.988815000  | 0.913005000  | -0.794039000 |
| C  | 6.988815000  | -0.913005000 | 0.794039000  |
| C  | 7.687884000  | 0.000000000  | 0.000000000  |
| C  | -0.913005000 | 6.988815000  | 0.794039000  |
| C  | -0.913005000 | -6.988815000 | -0.794039000 |
| C  | -0.920010000 | 5.596616000  | 0.785486000  |
| C  | -0.920010000 | -5.596616000 | -0.785486000 |
| C  | -1.144719000 | 2.735711000  | -0.467747000 |
| C  | -1.144719000 | -2.735711000 | 0.467747000  |
| C  | -2.289107000 | 3.264726000  | -1.192737000 |
| C  | -2.289107000 | -3.264726000 | 1.192737000  |
| C  | -2.735711000 | 1.144719000  | -0.467747000 |
| C  | -2.735711000 | -1.144719000 | 0.467747000  |
| C  | -3.264726000 | 2.289107000  | -1.192737000 |
| C  | -3.264726000 | -2.289107000 | 1.192737000  |
| C  | -3.406586000 | 0.000000000  | 0.000000000  |
| C  | -4.889677000 | 0.000000000  | 0.000000000  |
| C  | -5.596616000 | 0.920010000  | 0.785486000  |
| C  | -5.596616000 | -0.920010000 | -0.785486000 |
| C  | -6.988815000 | 0.913005000  | 0.794039000  |
| C  | -6.988815000 | -0.913005000 | -0.794039000 |
| C  | -7.687884000 | 0.000000000  | 0.000000000  |
| H  | 0.000000000  | 8.777447000  | 0.000000000  |
| H  | 0.000000000  | -8.777447000 | 0.000000000  |
| H  | 1.624591000  | 7.530202000  | -1.415388000 |

|   |              |              |              |
|---|--------------|--------------|--------------|
| H | 1.624591000  | -7.530202000 | 1.415388000  |
| H | 1.631755000  | 5.041426000  | -1.394844000 |
| H | 1.631755000  | -5.041426000 | 1.394844000  |
| H | 5.041426000  | 1.631755000  | -1.394844000 |
| H | 5.041426000  | -1.631755000 | 1.394844000  |
| H | 7.530202000  | 1.624591000  | -1.415388000 |
| H | 7.530202000  | -1.624591000 | 1.415388000  |
| H | 8.777447000  | 0.000000000  | 0.000000000  |
| H | -1.624591000 | 7.530202000  | 1.415388000  |
| H | -1.624591000 | -7.530202000 | -1.415388000 |
| H | -1.631755000 | 5.041426000  | 1.394844000  |
| H | -1.631755000 | -5.041426000 | -1.394844000 |
| H | -5.041426000 | 1.631755000  | 1.394844000  |
| H | -5.041426000 | -1.631755000 | -1.394844000 |
| H | -7.530202000 | 1.624591000  | 1.415388000  |
| H | -7.530202000 | -1.624591000 | -1.415388000 |
| H | -8.777447000 | 0.000000000  | 0.000000000  |
| I | 2.382785000  | 5.027539000  | 2.318059000  |
| I | 2.382785000  | -5.027539000 | -2.318059000 |
| I | 5.027539000  | 2.382785000  | 2.318059000  |
| I | 5.027539000  | -2.382785000 | -2.318059000 |
| I | -2.382785000 | 5.027539000  | -2.318059000 |
| I | -2.382785000 | -5.027539000 | 2.318059000  |
| I | -5.027539000 | 2.382785000  | -2.318059000 |
| I | -5.027539000 | -2.382785000 | 2.318059000  |
| N | 1.412916000  | 1.412916000  | 0.163626000  |
| N | 1.412916000  | -1.412916000 | -0.163626000 |
| N | -1.412916000 | 1.412916000  | -0.163626000 |
| N | -1.412916000 | -1.412916000 | 0.163626000  |

**98. Pt(I<sub>8</sub>TPP]; S = 0 (ruffled)**

|    |             |              |              |
|----|-------------|--------------|--------------|
| Pt | 0.000000000 | 0.000000000  | 0.000000000  |
| C  | 0.594076000 | 4.185465000  | -0.350631000 |
| C  | 0.594076000 | -4.185465000 | 0.350631000  |
| C  | 1.032792000 | 2.796954000  | -0.463469000 |
| C  | 1.032792000 | -2.796954000 | 0.463469000  |
| C  | 2.327714000 | 2.327714000  | -0.769619000 |
| C  | 2.327714000 | -2.327714000 | 0.769619000  |
| C  | 2.796954000 | 1.032792000  | -0.463469000 |
| C  | 2.796954000 | -1.032792000 | 0.463469000  |
| C  | 3.315487000 | 3.315487000  | -1.291833000 |
| C  | 3.315487000 | -3.315487000 | 1.291833000  |
| C  | 3.480076000 | 3.480076000  | -2.670394000 |
| C  | 3.480076000 | -3.480076000 | 2.670394000  |
| C  | 4.082972000 | 4.082972000  | -0.407174000 |
| C  | 4.082972000 | -4.082972000 | 0.407174000  |
| C  | 4.185465000 | 0.594076000  | -0.350631000 |
| C  | 4.185465000 | -0.594076000 | 0.350631000  |
| C  | 4.402981000 | 4.402981000  | -3.159689000 |

|   |              |              |              |
|---|--------------|--------------|--------------|
| C | 4.402981000  | -4.402981000 | 3.159689000  |
| C | 5.005212000  | 5.005212000  | -0.895285000 |
| C | 5.005212000  | -5.005212000 | 0.895285000  |
| C | 5.166541000  | 5.166541000  | -2.272964000 |
| C | 5.166541000  | -5.166541000 | 2.272964000  |
| C | -0.594076000 | 4.185465000  | 0.350631000  |
| C | -0.594076000 | -4.185465000 | -0.350631000 |
| C | -1.032792000 | 2.796954000  | 0.463469000  |
| C | -1.032792000 | -2.796954000 | -0.463469000 |
| C | -2.327714000 | 2.327714000  | 0.769619000  |
| C | -2.327714000 | -2.327714000 | -0.769619000 |
| C | -2.796954000 | 1.032792000  | 0.463469000  |
| C | -2.796954000 | -1.032792000 | -0.463469000 |
| C | -3.315487000 | 3.315487000  | 1.291833000  |
| C | -3.315487000 | -3.315487000 | -1.291833000 |
| C | -3.480076000 | 3.480076000  | 2.670394000  |
| C | -3.480076000 | -3.480076000 | -2.670394000 |
| C | -4.082972000 | 4.082972000  | 0.407174000  |
| C | -4.082972000 | -4.082972000 | -0.407174000 |
| C | -4.185465000 | 0.594076000  | 0.350631000  |
| C | -4.185465000 | -0.594076000 | -0.350631000 |
| C | -4.402981000 | 4.402981000  | 3.159689000  |
| C | -4.402981000 | -4.402981000 | -3.159689000 |
| C | -5.005212000 | 5.005212000  | 0.895285000  |
| C | -5.005212000 | -5.005212000 | -0.895285000 |
| C | -5.166541000 | 5.166541000  | 2.272964000  |
| C | -5.166541000 | -5.166541000 | -2.272964000 |
| H | 2.880344000  | 2.880344000  | -3.353506000 |
| H | 2.880344000  | -2.880344000 | 3.353506000  |
| H | 3.947685000  | 3.947685000  | 0.664950000  |
| H | 3.947685000  | -3.947685000 | -0.664950000 |
| H | 4.526703000  | 4.526703000  | -4.234414000 |
| H | 4.526703000  | -4.526703000 | 4.234414000  |
| H | 5.597752000  | 5.597752000  | -0.200345000 |
| H | 5.597752000  | -5.597752000 | 0.200345000  |
| H | 5.887573000  | 5.887573000  | -2.657001000 |
| H | 5.887573000  | -5.887573000 | 2.657001000  |
| H | -2.880344000 | 2.880344000  | 3.353506000  |
| H | -2.880344000 | -2.880344000 | -3.353506000 |
| H | -3.947685000 | 3.947685000  | -0.664950000 |
| H | -3.947685000 | -3.947685000 | 0.664950000  |
| H | -4.526703000 | 4.526703000  | 4.234414000  |
| H | -4.526703000 | -4.526703000 | -4.234414000 |
| H | -5.597752000 | 5.597752000  | 0.200345000  |
| H | -5.597752000 | -5.597752000 | -0.200345000 |
| H | -5.887573000 | 5.887573000  | 2.657001000  |
| H | -5.887573000 | -5.887573000 | -2.657001000 |
| I | 1.370170000  | 5.941512000  | -1.198420000 |
| I | 1.370170000  | -5.941512000 | 1.198420000  |
| I | 5.941512000  | 1.370170000  | -1.198420000 |
| I | 5.941512000  | -1.370170000 | 1.198420000  |

|   |              |              |              |
|---|--------------|--------------|--------------|
| I | -1.370170000 | 5.941512000  | 1.198420000  |
| I | -1.370170000 | -5.941512000 | -1.198420000 |
| I | -5.941512000 | 1.370170000  | 1.198420000  |
| I | -5.941512000 | -1.370170000 | -1.198420000 |
| N | 0.000000000  | 2.002190000  | 0.000000000  |
| N | 0.000000000  | -2.002190000 | 0.000000000  |
| N | 2.002190000  | 0.000000000  | 0.000000000  |
| N | -2.002190000 | 0.000000000  | 0.000000000  |

**99. Zn(I<sub>8</sub>TPP]; S = 0 (saddled)**

|    |              |              |              |
|----|--------------|--------------|--------------|
| Zn | 0.000000000  | 0.000000000  | 0.000000000  |
| C  | 0.000000000  | 3.411249000  | 0.000000000  |
| C  | 0.000000000  | 4.892780000  | 0.000000000  |
| C  | 0.000000000  | 7.692654000  | 0.000000000  |
| C  | 0.000000000  | -3.411249000 | 0.000000000  |
| C  | 0.000000000  | -4.892780000 | 0.000000000  |
| C  | 0.000000000  | -7.692654000 | 0.000000000  |
| C  | 0.922493000  | 6.993294000  | -0.782904000 |
| C  | 0.922493000  | -6.993294000 | 0.782904000  |
| C  | 0.929321000  | 5.601267000  | -0.774193000 |
| C  | 0.929321000  | -5.601267000 | 0.774193000  |
| C  | 1.156893000  | 2.739852000  | 0.456748000  |
| C  | 1.156893000  | -2.739852000 | -0.456748000 |
| C  | 2.291593000  | 3.270138000  | 1.196391000  |
| C  | 2.291593000  | -3.270138000 | -1.196391000 |
| C  | 2.739852000  | 1.156893000  | 0.456748000  |
| C  | 2.739852000  | -1.156893000 | -0.456748000 |
| C  | 3.270138000  | 2.291593000  | 1.196391000  |
| C  | 3.270138000  | -2.291593000 | -1.196391000 |
| C  | 3.411249000  | 0.000000000  | 0.000000000  |
| C  | 4.892780000  | 0.000000000  | 0.000000000  |
| C  | 5.601267000  | 0.929321000  | -0.774193000 |
| C  | 5.601267000  | -0.929321000 | 0.774193000  |
| C  | 6.993294000  | 0.922493000  | -0.782904000 |
| C  | 6.993294000  | -0.922493000 | 0.782904000  |
| C  | 7.692654000  | 0.000000000  | 0.000000000  |
| C  | -0.922493000 | 6.993294000  | 0.782904000  |
| C  | -0.922493000 | -6.993294000 | -0.782904000 |
| C  | -0.929321000 | 5.601267000  | 0.774193000  |
| C  | -0.929321000 | -5.601267000 | -0.774193000 |
| C  | -1.156893000 | 2.739852000  | -0.456748000 |
| C  | -1.156893000 | -2.739852000 | 0.456748000  |
| C  | -2.291593000 | 3.270138000  | -1.196391000 |
| C  | -2.291593000 | -3.270138000 | 1.196391000  |
| C  | -2.739852000 | 1.156893000  | -0.456748000 |
| C  | -2.739852000 | -1.156893000 | 0.456748000  |
| C  | -3.270138000 | 2.291593000  | -1.196391000 |
| C  | -3.270138000 | -2.291593000 | 1.196391000  |
| C  | -3.411249000 | 0.000000000  | 0.000000000  |

|   |              |              |              |
|---|--------------|--------------|--------------|
| C | -4.892780000 | 0.000000000  | 0.000000000  |
| C | -5.601267000 | 0.929321000  | 0.774193000  |
| C | -5.601267000 | -0.929321000 | -0.774193000 |
| C | -6.993294000 | 0.922493000  | 0.782904000  |
| C | -6.993294000 | -0.922493000 | -0.782904000 |
| C | -7.692654000 | 0.000000000  | 0.000000000  |
| H | 0.000000000  | 8.782219000  | 0.000000000  |
| H | 0.000000000  | -8.782219000 | 0.000000000  |
| H | 1.641331000  | 7.534614000  | -1.395988000 |
| H | 1.641331000  | -7.534614000 | 1.395988000  |
| H | 1.648025000  | 5.046588000  | -1.375757000 |
| H | 1.648025000  | -5.046588000 | 1.375757000  |
| H | 5.046588000  | 1.648025000  | -1.375757000 |
| H | 5.046588000  | -1.648025000 | 1.375757000  |
| H | 7.534614000  | 1.641331000  | -1.395988000 |
| H | 7.534614000  | -1.641331000 | 1.395988000  |
| H | 8.782219000  | 0.000000000  | 0.000000000  |
| H | -1.641331000 | 7.534614000  | 1.395988000  |
| H | -1.641331000 | -7.534614000 | -1.395988000 |
| H | -1.648025000 | 5.046588000  | 1.375757000  |
| H | -1.648025000 | -5.046588000 | -1.375757000 |
| H | -5.046588000 | 1.648025000  | 1.375757000  |
| H | -5.046588000 | -1.648025000 | -1.375757000 |
| H | -7.534614000 | 1.641331000  | 1.395988000  |
| H | -7.534614000 | -1.641331000 | -1.395988000 |
| H | -8.782219000 | 0.000000000  | 0.000000000  |
| I | 2.382525000  | 5.026849000  | 2.333404000  |
| I | 2.382525000  | -5.026849000 | -2.333404000 |
| I | 5.026849000  | 2.382525000  | 2.333404000  |
| I | 5.026849000  | -2.382525000 | -2.333404000 |
| I | -2.382525000 | 5.026849000  | -2.333404000 |
| I | -2.382525000 | -5.026849000 | 2.333404000  |
| I | -5.026849000 | 2.382525000  | -2.333404000 |
| I | -5.026849000 | -2.382525000 | 2.333404000  |
| N | 1.431361000  | 1.431361000  | 0.129191000  |
| N | 1.431361000  | -1.431361000 | -0.129191000 |
| N | -1.431361000 | 1.431361000  | -0.129191000 |
| N | -1.431361000 | -1.431361000 | 0.129191000  |

**100. Zn(I<sub>8</sub>TPP]; S = 0 (ruffled)**

|    |             |              |              |
|----|-------------|--------------|--------------|
| Zn | 0.000000000 | 0.000000000  | 0.000000000  |
| C  | 0.602176000 | 4.203095000  | -0.340533000 |
| C  | 0.602176000 | -4.203095000 | 0.340533000  |
| C  | 1.036837000 | 2.812091000  | -0.443401000 |
| C  | 1.036837000 | -2.812091000 | 0.443401000  |
| C  | 2.337280000 | 2.337280000  | -0.739656000 |
| C  | 2.337280000 | -2.337280000 | 0.739656000  |
| C  | 2.812091000 | 1.036837000  | -0.443401000 |
| C  | 2.812091000 | -1.036837000 | 0.443401000  |

|   |              |              |              |
|---|--------------|--------------|--------------|
| C | 3.329744000  | 3.329744000  | -1.244875000 |
| C | 3.329744000  | -3.329744000 | 1.244875000  |
| C | 3.507354000  | 3.507354000  | -2.620229000 |
| C | 3.507354000  | -3.507354000 | 2.620229000  |
| C | 4.089425000  | 4.089425000  | -0.346973000 |
| C | 4.089425000  | -4.089425000 | 0.346973000  |
| C | 4.203095000  | 0.602176000  | -0.340533000 |
| C | 4.203095000  | -0.602176000 | 0.340533000  |
| C | 4.434398000  | 4.434398000  | -3.093252000 |
| C | 4.434398000  | -4.434398000 | 3.093252000  |
| C | 5.016041000  | 5.016041000  | -0.818553000 |
| C | 5.016041000  | -5.016041000 | 0.818553000  |
| C | 5.189967000  | 5.189967000  | -2.193138000 |
| C | 5.189967000  | -5.189967000 | 2.193138000  |
| C | -0.602176000 | 4.203095000  | 0.340533000  |
| C | -0.602176000 | -4.203095000 | -0.340533000 |
| C | -1.036837000 | 2.812091000  | 0.443401000  |
| C | -1.036837000 | -2.812091000 | -0.443401000 |
| C | -2.337280000 | 2.337280000  | 0.739656000  |
| C | -2.337280000 | -2.337280000 | -0.739656000 |
| C | -2.812091000 | 1.036837000  | 0.443401000  |
| C | -2.812091000 | -1.036837000 | -0.443401000 |
| C | -3.329744000 | 3.329744000  | 1.244875000  |
| C | -3.329744000 | -3.329744000 | -1.244875000 |
| C | -3.507354000 | 3.507354000  | 2.620229000  |
| C | -3.507354000 | -3.507354000 | -2.620229000 |
| C | -4.089425000 | 4.089425000  | 0.346973000  |
| C | -4.089425000 | -4.089425000 | -0.346973000 |
| C | -4.203095000 | 0.602176000  | 0.340533000  |
| C | -4.203095000 | -0.602176000 | -0.340533000 |
| C | -4.434398000 | 4.434398000  | 3.093252000  |
| C | -4.434398000 | -4.434398000 | -3.093252000 |
| C | -5.016041000 | 5.016041000  | 0.818553000  |
| C | -5.016041000 | -5.016041000 | -0.818553000 |
| C | -5.189967000 | 5.189967000  | 2.193138000  |
| C | -5.189967000 | -5.189967000 | -2.193138000 |
| H | 2.914182000  | 2.914182000  | -3.314697000 |
| H | 2.914182000  | -2.914182000 | 3.314697000  |
| H | 3.944923000  | 3.944923000  | 0.722724000  |
| H | 3.944923000  | -3.944923000 | -0.722724000 |
| H | 4.567518000  | 4.567518000  | -4.165714000 |
| H | 4.567518000  | -4.567518000 | 4.165714000  |
| H | 5.602242000  | 5.602242000  | -0.112863000 |
| H | 5.602242000  | -5.602242000 | 0.112863000  |
| H | 5.914410000  | 5.914410000  | -2.564050000 |
| H | 5.914410000  | -5.914410000 | 2.564050000  |
| H | -2.914182000 | 2.914182000  | 3.314697000  |
| H | -2.914182000 | -2.914182000 | -3.314697000 |
| H | -3.944923000 | 3.944923000  | -0.722724000 |
| H | -3.944923000 | -3.944923000 | 0.722724000  |
| H | -4.567518000 | 4.567518000  | 4.165714000  |

|   |              |              |              |
|---|--------------|--------------|--------------|
| H | -4.567518000 | -4.567518000 | -4.165714000 |
| H | -5.602242000 | 5.602242000  | 0.112863000  |
| H | -5.602242000 | -5.602242000 | -0.112863000 |
| H | -5.914410000 | 5.914410000  | 2.564050000  |
| H | -5.914410000 | -5.914410000 | -2.564050000 |
| I | 1.384605000  | 5.964709000  | -1.175941000 |
| I | 1.384605000  | -5.964709000 | 1.175941000  |
| I | 5.964709000  | 1.384605000  | -1.175941000 |
| I | 5.964709000  | -1.384605000 | 1.175941000  |
| I | -1.384605000 | 5.964709000  | 1.175941000  |
| I | -1.384605000 | -5.964709000 | -1.175941000 |
| I | -5.964709000 | 1.384605000  | 1.175941000  |
| I | -5.964709000 | -1.384605000 | -1.175941000 |
| N | 0.000000000  | 2.017293000  | 0.000000000  |
| N | 0.000000000  | -2.017293000 | 0.000000000  |
| N | 2.017293000  | 0.000000000  | 0.000000000  |
| N | -2.017293000 | 0.000000000  | 0.000000000  |

**101. Cu[A<sub>4</sub>Me<sub>8</sub>]; S = ½ (saddled)**

|    |              |              |              |
|----|--------------|--------------|--------------|
| Cu | 0.006651000  | 0.058588000  | 0.000000000  |
| C  | 0.581469000  | -1.042934000 | 4.013680000  |
| C  | 0.581469000  | -1.042934000 | -4.013680000 |
| C  | 1.055124000  | -0.497036000 | 2.754935000  |
| C  | 1.055124000  | -0.497036000 | -2.754935000 |
| C  | 1.390752000  | -1.682265000 | 5.100584000  |
| C  | 1.390752000  | -1.682265000 | -5.100584000 |
| C  | 2.392585000  | -0.203242000 | 2.398519000  |
| C  | 2.392585000  | -0.203242000 | -2.398519000 |
| C  | 2.786609000  | 0.205011000  | 1.101807000  |
| C  | 2.786609000  | 0.205011000  | -1.101807000 |
| C  | 3.395882000  | -0.338052000 | 3.385300000  |
| C  | 3.395882000  | -0.338052000 | -3.385300000 |
| C  | 4.099349000  | 0.664669000  | 0.689522000  |
| C  | 4.099349000  | 0.664669000  | -0.689522000 |
| C  | 4.268288000  | -0.466082000 | 4.234962000  |
| C  | 4.268288000  | -0.466082000 | -4.234962000 |
| C  | 5.127583000  | 0.314999000  | 7.019992000  |
| C  | 5.127583000  | 0.314999000  | -7.019992000 |
| C  | 5.234812000  | 1.104264000  | 1.561884000  |
| C  | 5.234812000  | 1.104264000  | -1.561884000 |
| C  | 5.641957000  | -2.527601000 | 5.935125000  |
| C  | 5.641957000  | -2.527601000 | -5.935125000 |
| C  | 7.203139000  | -0.117315000 | 4.760518000  |
| C  | 7.203139000  | -0.117315000 | -4.760518000 |
| C  | -0.789756000 | -0.895747000 | 4.013539000  |
| C  | -0.789756000 | -0.895747000 | -4.013539000 |
| C  | -1.136531000 | -0.261891000 | 2.754668000  |
| C  | -1.136531000 | -0.261891000 | -2.754668000 |
| C  | -1.716376000 | -1.348612000 | 5.100439000  |



|   |              |              |              |
|---|--------------|--------------|--------------|
| C | -1.716376000 | -1.348612000 | -5.100439000 |
| C | -2.381027000 | 0.309171000  | 2.398083000  |
| C | -2.381027000 | 0.309171000  | -2.398083000 |
| C | -2.678525000 | 0.793132000  | 1.101715000  |
| C | -2.678525000 | 0.793132000  | -1.101715000 |
| C | -3.391237000 | 0.388281000  | 3.383820000  |
| C | -3.391237000 | 0.388281000  | -3.383820000 |
| C | -3.862954000 | 1.522307000  | 0.689524000  |
| C | -3.862954000 | 1.522307000  | -0.689524000 |
| C | -4.272056000 | 0.445509000  | 4.232517000  |
| C | -4.272056000 | 0.445509000  | -4.232517000 |
| C | -4.878022000 | 2.194320000  | 1.562175000  |
| C | -4.878022000 | 2.194320000  | -1.562175000 |
| C | -4.939285000 | 1.366557000  | 7.027030000  |
| C | -4.939285000 | 1.366557000  | -7.027030000 |
| C | -6.063667000 | -1.282854000 | 5.915223000  |
| C | -6.063667000 | -1.282854000 | -5.915223000 |
| C | -7.059572000 | 1.422124000  | 4.767595000  |
| C | -7.059572000 | 1.422124000  | -4.767595000 |
| H | 0.746475000  | -2.278117000 | 5.757970000  |
| H | 0.746475000  | -2.278117000 | -5.757970000 |
| H | 1.901951000  | -0.932388000 | 5.719996000  |
| H | 1.901951000  | -0.932388000 | -5.719996000 |
| H | 2.168094000  | -2.339188000 | 4.693818000  |
| H | 2.168094000  | -2.339188000 | -4.693818000 |
| H | 4.160789000  | -0.007657000 | 7.432733000  |
| H | 4.160789000  | -0.007657000 | -7.432733000 |
| H | 4.674293000  | -2.868232000 | 6.331055000  |
| H | 4.674293000  | -2.868232000 | -6.331055000 |
| H | 4.883709000  | 1.679843000  | 2.425840000  |
| H | 4.883709000  | 1.679843000  | -2.425840000 |
| H | 5.050655000  | 1.383549000  | 6.773700000  |
| H | 5.050655000  | 1.383549000  | -6.773700000 |
| H | 5.797181000  | 0.248627000  | 1.960246000  |
| H | 5.797181000  | 0.248627000  | -1.960246000 |
| H | 5.878089000  | -3.133819000 | 5.049074000  |
| H | 5.878089000  | -3.133819000 | -5.049074000 |
| H | 5.891747000  | 0.194660000  | 7.803073000  |
| H | 5.891747000  | 0.194660000  | -7.803073000 |
| H | 5.934407000  | 1.728909000  | 0.993455000  |
| H | 5.934407000  | 1.728909000  | -0.993455000 |
| H | 6.411252000  | -2.716542000 | 6.699415000  |
| H | 6.411252000  | -2.716542000 | -6.699415000 |
| H | 7.138836000  | 0.935675000  | 4.451116000  |
| H | 7.138836000  | 0.935675000  | -4.451116000 |
| H | 7.467034000  | -0.715272000 | 3.876429000  |
| H | 7.467034000  | -0.715272000 | -3.876429000 |
| H | 8.018311000  | -0.211199000 | 5.493983000  |
| H | 8.018311000  | -0.211199000 | -5.493983000 |
| H | -1.212902000 | -2.066426000 | 5.758863000  |
| H | -1.212902000 | -2.066426000 | -5.758863000 |

|    |              |              |              |
|----|--------------|--------------|--------------|
| H  | -2.057946000 | -0.507065000 | 5.718847000  |
| H  | -2.057946000 | -0.507065000 | -5.718847000 |
| H  | -2.614737000 | -1.826929000 | 4.693713000  |
| H  | -2.614737000 | -1.826929000 | -4.693713000 |
| H  | -4.066876000 | 0.835253000  | 7.434207000  |
| H  | -4.066876000 | 0.835253000  | -7.434207000 |
| H  | -4.411781000 | 2.681030000  | 2.426351000  |
| H  | -4.411781000 | 2.681030000  | -2.426351000 |
| H  | -4.629701000 | 2.394665000  | 6.791437000  |
| H  | -4.629701000 | 2.394665000  | -6.791437000 |
| H  | -5.194149000 | -1.830706000 | 6.306335000  |
| H  | -5.194149000 | -1.830706000 | -6.306335000 |
| H  | -5.427737000 | 2.954507000  | 0.994110000  |
| H  | -5.427737000 | 2.954507000  | -0.994110000 |
| H  | -5.610454000 | 1.478705000  | 1.960305000  |
| H  | -5.610454000 | 1.478705000  | -1.960305000 |
| H  | -5.711142000 | 1.408650000  | 7.810684000  |
| H  | -5.711142000 | 1.408650000  | -7.810684000 |
| H  | -6.426108000 | -1.814064000 | 5.023726000  |
| H  | -6.426108000 | -1.814064000 | -5.023726000 |
| H  | -6.766574000 | 2.438601000  | 4.468354000  |
| H  | -6.766574000 | 2.438601000  | -4.468354000 |
| H  | -6.856099000 | -1.306478000 | 6.678869000  |
| H  | -6.856099000 | -1.306478000 | -6.678869000 |
| H  | -7.447645000 | 0.905172000  | 3.878239000  |
| H  | -7.447645000 | 0.905172000  | -3.878239000 |
| H  | -7.875698000 | 1.501325000  | 5.501695000  |
| H  | -7.875698000 | 1.501325000  | -5.501695000 |
| N  | 1.985231000  | 0.028146000  | 0.000000000  |
| N  | -0.012488000 | -0.117452000 | 1.978221000  |
| N  | -0.012488000 | -0.117452000 | -1.978221000 |
| N  | -1.933009000 | 0.449992000  | 0.000000000  |
| Si | 5.568949000  | -0.697695000 | 5.495361000  |
| Si | 5.568949000  | -0.697695000 | -5.495361000 |
| Si | -5.591997000 | 0.491056000  | 5.493284000  |
| Si | -5.591997000 | 0.491056000  | -5.493284000 |

**102. Cu[A<sub>4</sub>Me<sub>8</sub>]; S = ½ (ruffled)**

|    |             |              |              |
|----|-------------|--------------|--------------|
| Cu | 0.000000000 | 0.000000000  | 0.000000000  |
| C  | 0.635265000 | 4.187980000  | 0.268891000  |
| C  | 0.635265000 | -4.187980000 | -0.268891000 |
| C  | 1.030786000 | 2.796083000  | 0.393367000  |
| C  | 1.030786000 | -2.796083000 | -0.393367000 |
| C  | 1.448740000 | 5.406212000  | 0.584019000  |
| C  | 1.448740000 | -5.406212000 | -0.584019000 |
| C  | 2.322336000 | 2.322336000  | 0.731024000  |
| C  | 2.322336000 | -2.322336000 | -0.731024000 |
| C  | 2.796083000 | 1.030786000  | 0.393367000  |
| C  | 2.796083000 | -1.030786000 | -0.393367000 |

|   |              |              |              |
|---|--------------|--------------|--------------|
| C | 3.197235000  | 3.197235000  | 1.413108000  |
| C | 3.197235000  | -3.197235000 | -1.413108000 |
| C | 3.930033000  | 3.930033000  | 2.065802000  |
| C | 3.930033000  | -3.930033000 | -2.065802000 |
| C | 4.030087000  | 6.226963000  | 4.008295000  |
| C | 4.030087000  | -6.226963000 | -4.008295000 |
| C | 4.187980000  | 0.635265000  | 0.268891000  |
| C | 4.187980000  | -0.635265000 | -0.268891000 |
| C | 5.406212000  | 1.448740000  | 0.584019000  |
| C | 5.406212000  | -1.448740000 | -0.584019000 |
| C | 6.035596000  | 6.035596000  | 1.664965000  |
| C | 6.035596000  | -6.035596000 | -1.664965000 |
| C | 6.226963000  | 4.030087000  | 4.008295000  |
| C | 6.226963000  | -4.030087000 | -4.008295000 |
| C | -0.635265000 | 4.187980000  | -0.268891000 |
| C | -0.635265000 | -4.187980000 | 0.268891000  |
| C | -1.030786000 | 2.796083000  | -0.393367000 |
| C | -1.030786000 | -2.796083000 | 0.393367000  |
| C | -1.448740000 | 5.406212000  | -0.584019000 |
| C | -1.448740000 | -5.406212000 | 0.584019000  |
| C | -2.322336000 | 2.322336000  | -0.731024000 |
| C | -2.322336000 | -2.322336000 | 0.731024000  |
| C | -2.796083000 | 1.030786000  | -0.393367000 |
| C | -2.796083000 | -1.030786000 | 0.393367000  |
| C | -3.197235000 | 3.197235000  | -1.413108000 |
| C | -3.197235000 | -3.197235000 | 1.413108000  |
| C | -3.930033000 | 3.930033000  | -2.065802000 |
| C | -3.930033000 | -3.930033000 | 2.065802000  |
| C | -4.030087000 | 6.226963000  | -4.008295000 |
| C | -4.030087000 | -6.226963000 | 4.008295000  |
| C | -4.187980000 | 0.635265000  | -0.268891000 |
| C | -4.187980000 | -0.635265000 | 0.268891000  |
| C | -5.406212000 | 1.448740000  | -0.584019000 |
| C | -5.406212000 | -1.448740000 | 0.584019000  |
| C | -6.035596000 | 6.035596000  | -1.664965000 |
| C | -6.035596000 | -6.035596000 | 1.664965000  |
| C | -6.226963000 | 4.030087000  | -4.008295000 |
| C | -6.226963000 | -4.030087000 | 4.008295000  |
| H | 0.944249000  | 6.311374000  | 0.228724000  |
| H | 0.944249000  | -6.311374000 | -0.228724000 |
| H | 1.622105000  | 5.510005000  | 1.663183000  |
| H | 1.622105000  | -5.510005000 | -1.663183000 |
| H | 2.437608000  | 5.364069000  | 0.110290000  |
| H | 2.437608000  | -5.364069000 | -0.110290000 |
| H | 3.343287000  | 6.813924000  | 3.381325000  |
| H | 3.343287000  | -6.813924000 | -3.381325000 |
| H | 3.428349000  | 5.665796000  | 4.737217000  |
| H | 3.428349000  | -5.665796000 | -4.737217000 |
| H | 4.674760000  | 6.928730000  | 4.559064000  |
| H | 4.674760000  | -6.928730000 | -4.559064000 |
| H | 5.359790000  | 6.617541000  | 1.021977000  |

|   |              |              |              |
|---|--------------|--------------|--------------|
| H | 5.359790000  | -6.617541000 | -1.021977000 |
| H | 5.364069000  | 2.437608000  | 0.110290000  |
| H | 5.364069000  | -2.437608000 | -0.110290000 |
| H | 5.510005000  | 1.622105000  | 1.663183000  |
| H | 5.510005000  | -1.622105000 | -1.663183000 |
| H | 5.665796000  | 3.428349000  | 4.737217000  |
| H | 5.665796000  | -3.428349000 | -4.737217000 |
| H | 6.311374000  | 0.944249000  | 0.228724000  |
| H | 6.311374000  | -0.944249000 | -0.228724000 |
| H | 6.617541000  | 5.359790000  | 1.021977000  |
| H | 6.617541000  | -5.359790000 | -1.021977000 |
| H | 6.733764000  | 6.733764000  | 2.151729000  |
| H | 6.733764000  | -6.733764000 | -2.151729000 |
| H | 6.813924000  | 3.343287000  | 3.381325000  |
| H | 6.813924000  | -3.343287000 | -3.381325000 |
| H | 6.928730000  | 4.674760000  | 4.559064000  |
| H | 6.928730000  | -4.674760000 | -4.559064000 |
| H | -0.944249000 | 6.311374000  | -0.228724000 |
| H | -0.944249000 | -6.311374000 | 0.228724000  |
| H | -1.622105000 | 5.510005000  | -1.663183000 |
| H | -1.622105000 | -5.510005000 | 1.663183000  |
| H | -2.437608000 | 5.364069000  | -0.110290000 |
| H | -2.437608000 | -5.364069000 | 0.110290000  |
| H | -3.343287000 | 6.813924000  | -3.381325000 |
| H | -3.343287000 | -6.813924000 | 3.381325000  |
| H | -3.428349000 | 5.665796000  | -4.737217000 |
| H | -3.428349000 | -5.665796000 | 4.737217000  |
| H | -4.674760000 | 6.928730000  | -4.559064000 |
| H | -4.674760000 | -6.928730000 | 4.559064000  |
| H | -5.359790000 | 6.617541000  | -1.021977000 |
| H | -5.359790000 | -6.617541000 | 1.021977000  |
| H | -5.364069000 | 2.437608000  | -0.110290000 |
| H | -5.364069000 | -2.437608000 | 0.110290000  |
| H | -5.510005000 | 1.622105000  | -1.663183000 |
| H | -5.510005000 | -1.622105000 | 1.663183000  |
| H | -5.665796000 | 3.428349000  | -4.737217000 |
| H | -5.665796000 | -3.428349000 | 4.737217000  |
| H | -6.311374000 | 0.944249000  | -0.228724000 |
| H | -6.311374000 | -0.944249000 | 0.228724000  |
| H | -6.617541000 | 5.359790000  | -1.021977000 |
| H | -6.617541000 | -5.359790000 | 1.021977000  |
| H | -6.733764000 | 6.733764000  | -2.151729000 |
| H | -6.733764000 | -6.733764000 | 2.151729000  |
| H | -6.813924000 | 3.343287000  | -3.381325000 |
| H | -6.813924000 | -3.343287000 | 3.381325000  |
| H | -6.928730000 | 4.674760000  | -4.559064000 |
| H | -6.928730000 | -4.674760000 | 4.559064000  |
| N | 0.000000000  | 1.981277000  | 0.000000000  |
| N | 0.000000000  | -1.981277000 | 0.000000000  |
| N | 1.981277000  | 0.000000000  | 0.000000000  |
| N | -1.981277000 | 0.000000000  | 0.000000000  |

|    |              |              |              |
|----|--------------|--------------|--------------|
| Si | 5.060523000  | 5.060523000  | 2.949212000  |
| Si | 5.060523000  | -5.060523000 | -2.949212000 |
| Si | -5.060523000 | 5.060523000  | -2.949212000 |
| Si | -5.060523000 | -5.060523000 | 2.949212000  |

**103. Ni [A<sub>4</sub>Me<sub>8</sub>]; S = 0 (saddled)**

|    |              |              |              |
|----|--------------|--------------|--------------|
| Ni | 0.005051000  | 0.049561000  | 0.000000000  |
| C  | 0.564433000  | -1.203191000 | 3.890328000  |
| C  | 0.564433000  | -1.203191000 | -3.890328000 |
| C  | 1.043296000  | -0.587474000 | 2.671413000  |
| C  | 1.043296000  | -0.587474000 | -2.671413000 |
| C  | 1.378035000  | -1.890016000 | 4.943999000  |
| C  | 1.378035000  | -1.890016000 | -4.943999000 |
| C  | 2.364012000  | -0.207374000 | 2.370112000  |
| C  | 2.364012000  | -0.207374000 | -2.370112000 |
| C  | 2.715359000  | 0.284815000  | 1.099424000  |
| C  | 2.715359000  | 0.284815000  | -1.099424000 |
| C  | 3.365071000  | -0.334501000 | 3.359444000  |
| C  | 3.365071000  | -0.334501000 | -3.359444000 |
| C  | 3.998407000  | 0.812385000  | 0.688571000  |
| C  | 3.998407000  | 0.812385000  | -0.688571000 |
| C  | 4.235511000  | -0.454147000 | 4.211916000  |
| C  | 4.235511000  | -0.454147000 | -4.211916000 |
| C  | 5.108860000  | 1.294106000  | 1.570353000  |
| C  | 5.108860000  | 1.294106000  | -1.570353000 |
| C  | 5.122465000  | 0.336100000  | 6.989155000  |
| C  | 5.122465000  | 0.336100000  | -6.989155000 |
| C  | 5.631258000  | -2.507435000 | 5.901569000  |
| C  | 5.631258000  | -2.507435000 | -5.901569000 |
| C  | 7.172351000  | -0.092406000 | 4.707721000  |
| C  | 7.172351000  | -0.092406000 | -4.707721000 |
| C  | -0.805064000 | -1.057625000 | 3.890420000  |
| C  | -0.805064000 | -1.057625000 | -3.890420000 |
| C  | -1.143882000 | -0.354954000 | 2.671543000  |
| C  | -1.143882000 | -0.354954000 | -2.671543000 |
| C  | -1.744951000 | -1.557950000 | 4.944102000  |
| C  | -1.744951000 | -1.557950000 | -4.944102000 |
| C  | -2.355115000 | 0.294463000  | 2.370241000  |
| C  | -2.355115000 | 0.294463000  | -2.370241000 |
| C  | -2.595065000 | 0.849380000  | 1.099454000  |
| C  | -2.595065000 | 0.849380000  | -1.099454000 |
| C  | -3.360225000 | 0.381712000  | 3.359816000  |
| C  | -3.360225000 | 0.381712000  | -3.359816000 |
| C  | -3.738102000 | 1.635528000  | 0.688577000  |
| C  | -3.738102000 | 1.635528000  | -0.688577000 |
| C  | -4.236342000 | 0.448968000  | 4.212223000  |
| C  | -4.236342000 | 0.448968000  | -4.212223000 |
| C  | -4.721881000 | 2.340776000  | 1.570312000  |
| C  | -4.721881000 | 2.340776000  | -1.570312000 |

|   |              |              |              |
|---|--------------|--------------|--------------|
| C | -4.925047000 | 1.392227000  | 6.997489000  |
| C | -4.925047000 | 1.392227000  | -6.997489000 |
| C | -6.051259000 | -1.259140000 | 5.889043000  |
| C | -6.051259000 | -1.259140000 | -5.889043000 |
| C | -7.020580000 | 1.446179000  | 4.717639000  |
| C | -7.020580000 | 1.446179000  | -4.717639000 |
| H | 0.742926000  | -2.554012000 | 5.543067000  |
| H | 0.742926000  | -2.554012000 | -5.543067000 |
| H | 1.849564000  | -1.169341000 | 5.626702000  |
| H | 1.849564000  | -1.169341000 | -5.626702000 |
| H | 2.186092000  | -2.487770000 | 4.507021000  |
| H | 2.186092000  | -2.487770000 | -4.507021000 |
| H | 4.161347000  | 0.012902000  | 7.414365000  |
| H | 4.161347000  | 0.012902000  | -7.414365000 |
| H | 4.667428000  | -2.851575000 | 6.303754000  |
| H | 4.667428000  | -2.851575000 | -6.303754000 |
| H | 4.727219000  | 1.828624000  | 2.447775000  |
| H | 4.727219000  | 1.828624000  | -2.447775000 |
| H | 5.040927000  | 1.404074000  | 6.741764000  |
| H | 5.040927000  | 1.404074000  | -6.741764000 |
| H | 5.719835000  | 0.462248000  | 1.947513000  |
| H | 5.719835000  | 0.462248000  | -1.947513000 |
| H | 5.770257000  | 1.970401000  | 1.014900000  |
| H | 5.770257000  | 1.970401000  | -1.014900000 |
| H | 5.863904000  | -3.112982000 | 5.014109000  |
| H | 5.863904000  | -3.112982000 | -5.014109000 |
| H | 5.896621000  | 0.218726000  | 7.762834000  |
| H | 5.896621000  | 0.218726000  | -7.762834000 |
| H | 6.406190000  | -2.693434000 | 6.660826000  |
| H | 6.406190000  | -2.693434000 | -6.660826000 |
| H | 7.101714000  | 0.961755000  | 4.403502000  |
| H | 7.101714000  | 0.961755000  | -4.403502000 |
| H | 7.425218000  | -0.686426000 | 3.817780000  |
| H | 7.425218000  | -0.686426000 | -3.817780000 |
| H | 7.997430000  | -0.187257000 | 5.429881000  |
| H | 7.997430000  | -0.187257000 | -5.429881000 |
| H | -1.263918000 | -2.341001000 | 5.542905000  |
| H | -1.263918000 | -2.341001000 | -5.542905000 |
| H | -2.054025000 | -0.754249000 | 5.627009000  |
| H | -2.054025000 | -0.754249000 | -5.627009000 |
| H | -2.660802000 | -1.971926000 | 4.507006000  |
| H | -2.660802000 | -1.971926000 | -4.507006000 |
| H | -4.058935000 | 0.860866000  | 7.417645000  |
| H | -4.058935000 | 0.860866000  | -7.417645000 |
| H | -4.235920000 | 2.783333000  | 2.447360000  |
| H | -4.235920000 | 2.783333000  | -2.447360000 |
| H | -4.609408000 | 2.417701000  | 6.758324000  |
| H | -4.609408000 | 2.417701000  | -6.758324000 |
| H | -5.187601000 | -1.811096000 | 6.287261000  |
| H | -5.187601000 | -1.811096000 | -6.287261000 |
| H | -5.226118000 | 3.140950000  | 1.014634000  |

|    |              |              |              |
|----|--------------|--------------|--------------|
| H  | -5.226118000 | 3.140950000  | -1.014634000 |
| H  | -5.494283000 | 1.656537000  | 1.948101000  |
| H  | -5.494283000 | 1.656537000  | -1.948101000 |
| H  | -5.705370000 | 1.442598000  | 7.772231000  |
| H  | -5.705370000 | 1.442598000  | -7.772231000 |
| H  | -6.411857000 | -1.791320000 | 4.997336000  |
| H  | -6.411857000 | -1.791320000 | -4.997336000 |
| H  | -6.718852000 | 2.460912000  | 4.420936000  |
| H  | -6.718852000 | 2.460912000  | -4.420936000 |
| H  | -6.848395000 | -1.274932000 | 6.647968000  |
| H  | -6.848395000 | -1.274932000 | -6.647968000 |
| H  | -7.399442000 | 0.929706000  | 3.824041000  |
| H  | -7.399442000 | 0.929706000  | -3.824041000 |
| H  | -7.845555000 | 1.530532000  | 5.441207000  |
| H  | -7.845555000 | 1.530532000  | -5.441207000 |
| N  | 1.906124000  | 0.087693000  | 0.000000000  |
| N  | -0.020073000 | -0.186796000 | 1.889497000  |
| N  | -0.020073000 | -0.186796000 | -1.889497000 |
| N  | -1.845545000 | 0.486228000  | 0.000000000  |
| Si | 5.548475000  | -0.678044000 | 5.461207000  |
| Si | 5.548475000  | -0.678044000 | -5.461207000 |
| Si | -5.565840000 | 0.510026000  | 5.462646000  |
| Si | -5.565840000 | 0.510026000  | -5.462646000 |

**104. Ni [A<sub>4</sub>Me<sub>8</sub>]; S = 0 (ruffled)**

|    |             |              |              |
|----|-------------|--------------|--------------|
| Ni | 0.000000000 | 0.000000000  | 0.000000000  |
| C  | 0.592060000 | 4.099409000  | 0.353554000  |
| C  | 0.592060000 | -4.099409000 | -0.353554000 |
| C  | 0.974897000 | 2.710827000  | 0.515097000  |
| C  | 0.974897000 | -2.710827000 | -0.515097000 |
| C  | 1.357349000 | 5.308501000  | 0.796136000  |
| C  | 1.357349000 | -5.308501000 | -0.796136000 |
| C  | 2.237454000 | 2.237454000  | 0.931392000  |
| C  | 2.237454000 | -2.237454000 | -0.931392000 |
| C  | 2.710827000 | 0.974897000  | 0.515097000  |
| C  | 2.710827000 | -0.974897000 | -0.515097000 |
| C  | 3.074460000 | 3.074460000  | 1.699763000  |
| C  | 3.074460000 | -3.074460000 | -1.699763000 |
| C  | 3.776677000 | 3.776677000  | 2.416358000  |
| C  | 3.776677000 | -3.776677000 | -2.416358000 |
| C  | 3.783145000 | 5.980167000  | 4.466674000  |
| C  | 3.783145000 | -5.980167000 | -4.466674000 |
| C  | 4.099409000 | 0.592060000  | 0.353554000  |
| C  | 4.099409000 | -0.592060000 | -0.353554000 |
| C  | 5.308501000 | 1.357349000  | 0.796136000  |
| C  | 5.308501000 | -1.357349000 | -0.796136000 |
| C  | 5.896245000 | 5.896245000  | 2.213277000  |
| C  | 5.896245000 | -5.896245000 | -2.213277000 |
| C  | 5.980167000 | 3.783145000  | 4.466674000  |

|   |              |              |              |
|---|--------------|--------------|--------------|
| C | 5.980167000  | -3.783145000 | -4.466674000 |
| C | -0.592060000 | 4.099409000  | -0.353554000 |
| C | -0.592060000 | -4.099409000 | 0.353554000  |
| C | -0.974897000 | 2.710827000  | -0.515097000 |
| C | -0.974897000 | -2.710827000 | 0.515097000  |
| C | -1.357349000 | 5.308501000  | -0.796136000 |
| C | -1.357349000 | -5.308501000 | 0.796136000  |
| C | -2.237454000 | 2.237454000  | -0.931392000 |
| C | -2.237454000 | -2.237454000 | 0.931392000  |
| C | -2.710827000 | 0.974897000  | -0.515097000 |
| C | -2.710827000 | -0.974897000 | 0.515097000  |
| C | -3.074460000 | 3.074460000  | -1.699763000 |
| C | -3.074460000 | -3.074460000 | 1.699763000  |
| C | -3.776677000 | 3.776677000  | -2.416358000 |
| C | -3.776677000 | -3.776677000 | 2.416358000  |
| C | -3.783145000 | 5.980167000  | -4.466674000 |
| C | -3.783145000 | -5.980167000 | 4.466674000  |
| C | -4.099409000 | 0.592060000  | -0.353554000 |
| C | -4.099409000 | -0.592060000 | 0.353554000  |
| C | -5.308501000 | 1.357349000  | -0.796136000 |
| C | -5.308501000 | -1.357349000 | 0.796136000  |
| C | -5.896245000 | 5.896245000  | -2.213277000 |
| C | -5.896245000 | -5.896245000 | 2.213277000  |
| C | -5.980167000 | 3.783145000  | -4.466674000 |
| C | -5.980167000 | -3.783145000 | 4.466674000  |
| H | 0.865583000  | 6.225546000  | 0.453411000  |
| H | 0.865583000  | -6.225546000 | -0.453411000 |
| H | 1.443075000  | 5.353297000  | 1.889544000  |
| H | 1.443075000  | -5.353297000 | -1.889544000 |
| H | 2.381712000  | 5.305782000  | 0.400910000  |
| H | 2.381712000  | -5.305782000 | -0.400910000 |
| H | 3.123585000  | 6.594204000  | 3.836375000  |
| H | 3.123585000  | -6.594204000 | -3.836375000 |
| H | 3.150798000  | 5.386276000  | 5.141718000  |
| H | 3.150798000  | -5.386276000 | -5.141718000 |
| H | 4.400512000  | 6.656748000  | 5.077005000  |
| H | 4.400512000  | -6.656748000 | -5.077005000 |
| H | 5.250486000  | 6.508271000  | 1.567327000  |
| H | 5.250486000  | -6.508271000 | -1.567327000 |
| H | 5.305782000  | 2.381712000  | 0.400910000  |
| H | 5.305782000  | -2.381712000 | -0.400910000 |
| H | 5.353297000  | 1.443075000  | 1.889544000  |
| H | 5.353297000  | -1.443075000 | -1.889544000 |
| H | 5.386276000  | 3.150798000  | 5.141718000  |
| H | 5.386276000  | -3.150798000 | -5.141718000 |
| H | 6.225546000  | 0.865583000  | 0.453411000  |
| H | 6.225546000  | -0.865583000 | -0.453411000 |
| H | 6.508271000  | 5.250486000  | 1.567327000  |
| H | 6.508271000  | -5.250486000 | -1.567327000 |
| H | 6.570190000  | 6.570190000  | 2.764054000  |
| H | 6.570190000  | -6.570190000 | -2.764054000 |



|    |              |              |              |
|----|--------------|--------------|--------------|
| H  | 6.594204000  | 3.123585000  | 3.836375000  |
| H  | 6.594204000  | -3.123585000 | -3.836375000 |
| H  | 6.656748000  | 4.400512000  | 5.077005000  |
| H  | 6.656748000  | -4.400512000 | -5.077005000 |
| H  | -0.865583000 | 6.225546000  | -0.453411000 |
| H  | -0.865583000 | -6.225546000 | 0.453411000  |
| H  | -1.443075000 | 5.353297000  | -1.889544000 |
| H  | -1.443075000 | -5.353297000 | 1.889544000  |
| H  | -2.381712000 | 5.305782000  | -0.400910000 |
| H  | -2.381712000 | -5.305782000 | 0.400910000  |
| H  | -3.123585000 | 6.594204000  | -3.836375000 |
| H  | -3.123585000 | -6.594204000 | 3.836375000  |
| H  | -3.150798000 | 5.386276000  | -5.141718000 |
| H  | -3.150798000 | -5.386276000 | 5.141718000  |
| H  | -4.400512000 | 6.656748000  | -5.077005000 |
| H  | -4.400512000 | -6.656748000 | 5.077005000  |
| H  | -5.250486000 | 6.508271000  | -1.567327000 |
| H  | -5.250486000 | -6.508271000 | 1.567327000  |
| H  | -5.305782000 | 2.381712000  | -0.400910000 |
| H  | -5.305782000 | -2.381712000 | 0.400910000  |
| H  | -5.353297000 | 1.443075000  | -1.889544000 |
| H  | -5.353297000 | -1.443075000 | 1.889544000  |
| H  | -5.386276000 | 3.150798000  | -5.141718000 |
| H  | -5.386276000 | -3.150798000 | 5.141718000  |
| H  | -6.225546000 | 0.865583000  | -0.453411000 |
| H  | -6.225546000 | -0.865583000 | 0.453411000  |
| H  | -6.508271000 | 5.250486000  | -1.567327000 |
| H  | -6.508271000 | -5.250486000 | 1.567327000  |
| H  | -6.570190000 | 6.570190000  | -2.764054000 |
| H  | -6.570190000 | -6.570190000 | 2.764054000  |
| H  | -6.594204000 | 3.123585000  | -3.836375000 |
| H  | -6.594204000 | -3.123585000 | 3.836375000  |
| H  | -6.656748000 | 4.400512000  | -5.077005000 |
| H  | -6.656748000 | -4.400512000 | 5.077005000  |
| N  | 0.000000000  | 1.890381000  | 0.000000000  |
| N  | 0.000000000  | -1.890381000 | 0.000000000  |
| N  | 1.890381000  | 0.000000000  | 0.000000000  |
| N  | -1.890381000 | 0.000000000  | 0.000000000  |
| Si | 4.863447000  | 4.863447000  | 3.403864000  |
| Si | 4.863447000  | -4.863447000 | -3.403864000 |
| Si | -4.863447000 | 4.863447000  | -3.403864000 |
| Si | -4.863447000 | -4.863447000 | 3.403864000  |

**105. Pd[A<sub>4</sub>Me<sub>8</sub>]; S = 0 (saddled)**

|    |             |              |              |
|----|-------------|--------------|--------------|
| Pd | 0.005500000 | 0.054075000  | 0.000000000  |
| C  | 0.587638000 | -0.981586000 | 4.055890000  |
| C  | 0.587638000 | -0.981586000 | -4.055890000 |
| C  | 1.064862000 | -0.463166000 | 2.785186000  |
| C  | 1.064862000 | -0.463166000 | -2.785186000 |

|   |              |              |              |
|---|--------------|--------------|--------------|
| C | 1.396469000  | -1.605380000 | 5.152652000  |
| C | 1.396469000  | -1.605380000 | -5.152652000 |
| C | 2.404008000  | -0.206900000 | 2.410351000  |
| C | 2.404008000  | -0.206900000 | -2.410351000 |
| C | 2.814073000  | 0.161665000  | 1.107940000  |
| C | 2.814073000  | 0.161665000  | -1.107940000 |
| C | 3.406850000  | -0.340896000 | 3.399205000  |
| C | 3.406850000  | -0.340896000 | -3.399205000 |
| C | 4.135259000  | 0.595873000  | 0.689112000  |
| C | 4.135259000  | 0.595873000  | -0.689112000 |
| C | 4.277436000  | -0.467673000 | 4.250088000  |
| C | 4.277436000  | -0.467673000 | -4.250088000 |
| C | 5.119106000  | 0.320552000  | 7.036757000  |
| C | 5.119106000  | 0.320552000  | -7.036757000 |
| C | 5.277750000  | 1.021949000  | 1.559600000  |
| C | 5.277750000  | 1.021949000  | -1.559600000 |
| C | 5.644989000  | -2.523908000 | 5.961792000  |
| C | 5.644989000  | -2.523908000 | -5.961792000 |
| C | 7.208973000  | -0.114443000 | 4.789369000  |
| C | 7.208973000  | -0.114443000 | -4.789369000 |
| C | -0.782772000 | -0.834780000 | 4.055925000  |
| C | -0.782772000 | -0.834780000 | -4.055925000 |
| C | -1.139482000 | -0.227155000 | 2.785186000  |
| C | -1.139482000 | -0.227155000 | -2.785186000 |
| C | -1.705127000 | -1.272431000 | 5.153145000  |
| C | -1.705127000 | -1.272431000 | -5.153145000 |
| C | -2.394092000 | 0.306523000  | 2.410234000  |
| C | -2.394092000 | 0.306523000  | -2.410234000 |
| C | -2.716578000 | 0.753963000  | 1.107910000  |
| C | -2.716578000 | 0.753963000  | -1.107910000 |
| C | -3.402968000 | 0.386937000  | 3.398753000  |
| C | -3.402968000 | 0.386937000  | -3.398753000 |
| C | -3.915723000 | 1.458318000  | 0.689117000  |
| C | -3.915723000 | 1.458318000  | -0.689117000 |
| C | -4.280904000 | 0.445934000  | 4.249481000  |
| C | -4.280904000 | 0.445934000  | -4.249481000 |
| C | -4.925095000 | 1.372520000  | 7.045700000  |
| C | -4.925095000 | 1.372520000  | -7.045700000 |
| C | -4.941649000 | 2.117036000  | 1.559792000  |
| C | -4.941649000 | 2.117036000  | -1.559792000 |
| C | -6.064755000 | -1.276278000 | 5.947054000  |
| C | -6.064755000 | -1.276278000 | -5.947054000 |
| C | -7.062934000 | 1.428656000  | 4.801578000  |
| C | -7.062934000 | 1.428656000  | -4.801578000 |
| H | 0.748502000  | -2.174927000 | 5.828960000  |
| H | 0.748502000  | -2.174927000 | -5.828960000 |
| H | 1.923820000  | -0.848814000 | 5.749732000  |
| H | 1.923820000  | -0.848814000 | -5.749732000 |
| H | 2.159816000  | -2.284972000 | 4.756665000  |
| H | 2.159816000  | -2.284972000 | -4.756665000 |
| H | 4.150539000  | -0.003557000 | 7.444240000  |

|   |              |              |              |
|---|--------------|--------------|--------------|
| H | 4.150539000  | -0.003557000 | -7.444240000 |
| H | 4.676068000  | -2.864542000 | 6.354679000  |
| H | 4.676068000  | -2.864542000 | -6.354679000 |
| H | 4.937460000  | 1.622300000  | 2.411067000  |
| H | 4.937460000  | 1.622300000  | -2.411067000 |
| H | 5.040982000  | 1.388226000  | 6.787119000  |
| H | 5.040982000  | 1.388226000  | -6.787119000 |
| H | 5.817149000  | 0.160356000  | 1.976029000  |
| H | 5.817149000  | 0.160356000  | -1.976029000 |
| H | 5.878461000  | 0.204202000  | 7.825069000  |
| H | 5.878461000  | 0.204202000  | -7.825069000 |
| H | 5.885245000  | -3.131985000 | 5.078119000  |
| H | 5.885245000  | -3.131985000 | -5.078119000 |
| H | 5.994791000  | 1.618934000  | 0.983793000  |
| H | 5.994791000  | 1.618934000  | -0.983793000 |
| H | 6.411396000  | -2.710327000 | 6.729594000  |
| H | 6.411396000  | -2.710327000 | -6.729594000 |
| H | 7.144440000  | 0.937112000  | 4.475229000  |
| H | 7.144440000  | 0.937112000  | -4.475229000 |
| H | 7.478999000  | -0.715457000 | 3.909230000  |
| H | 7.478999000  | -0.715457000 | -3.909230000 |
| H | 8.020193000  | -0.203942000 | 5.527697000  |
| H | 8.020193000  | -0.203942000 | -5.527697000 |
| H | -1.191801000 | -1.964230000 | 5.831036000  |
| H | -1.191801000 | -1.964230000 | -5.831036000 |
| H | -2.061594000 | -0.420667000 | 5.748460000  |
| H | -2.061594000 | -0.420667000 | -5.748460000 |
| H | -2.594298000 | -1.776876000 | 4.757841000  |
| H | -2.594298000 | -1.776876000 | -4.757841000 |
| H | -4.050707000 | 0.839552000  | 7.446430000  |
| H | -4.050707000 | 0.839552000  | -7.446430000 |
| H | -4.481525000 | 2.631534000  | 2.411156000  |
| H | -4.481525000 | 2.631534000  | -2.411156000 |
| H | -4.614749000 | 2.399358000  | 6.805645000  |
| H | -4.614749000 | 2.399358000  | -6.805645000 |
| H | -5.193960000 | -1.824930000 | 6.334184000  |
| H | -5.193960000 | -1.824930000 | -6.334184000 |
| H | -5.515875000 | 2.852555000  | 0.984120000  |
| H | -5.515875000 | 2.852555000  | -0.984120000 |
| H | -5.651385000 | 1.389479000  | 1.976453000  |
| H | -5.651385000 | 1.389479000  | -1.976453000 |
| H | -5.690073000 | 1.417979000  | 7.835852000  |
| H | -5.690073000 | 1.417979000  | -7.835852000 |
| H | -6.433356000 | -1.808599000 | 5.058746000  |
| H | -6.433356000 | -1.808599000 | -5.058746000 |
| H | -6.769652000 | 2.443415000  | 4.496887000  |
| H | -6.769652000 | 2.443415000  | -4.496887000 |
| H | -6.852761000 | -1.296976000 | 6.715354000  |
| H | -6.852761000 | -1.296976000 | -6.715354000 |
| H | -7.459251000 | 0.910061000  | 3.916846000  |
| H | -7.459251000 | 0.910061000  | -3.916846000 |

|    |              |              |              |
|----|--------------|--------------|--------------|
| H  | -7.873178000 | 1.512095000  | 5.541690000  |
| H  | -7.873178000 | 1.512095000  | -5.541690000 |
| N  | 2.017059000  | -0.009751000 | 0.000000000  |
| N  | -0.010082000 | -0.090796000 | 2.011108000  |
| N  | -0.010082000 | -0.090796000 | -2.011108000 |
| N  | -1.973900000 | 0.417723000  | 0.000000000  |
| Si | 5.572192000  | -0.695199000 | 5.517746000  |
| Si | 5.572192000  | -0.695199000 | -5.517746000 |
| Si | -5.592623000 | 0.495890000  | 5.519129000  |
| Si | -5.592623000 | 0.495890000  | -5.519129000 |

**106. Pd[A<sub>4</sub>Me<sub>8</sub>]; S = 0 (ruffled)**

|    |              |              |              |
|----|--------------|--------------|--------------|
| Pd | 0.000000000  | 0.000000000  | 0.000000000  |
| C  | 0.650570000  | 4.219655000  | 0.227352000  |
| C  | 0.650570000  | -4.219655000 | -0.227352000 |
| C  | 1.055597000  | 2.827864000  | 0.338511000  |
| C  | 1.055597000  | -2.827864000 | -0.338511000 |
| C  | 1.482193000  | 5.441882000  | 0.474890000  |
| C  | 1.482193000  | -5.441882000 | -0.474890000 |
| C  | 2.356147000  | 2.356147000  | 0.636155000  |
| C  | 2.356147000  | -2.356147000 | -0.636155000 |
| C  | 2.827864000  | 1.055597000  | 0.338511000  |
| C  | 2.827864000  | -1.055597000 | -0.338511000 |
| C  | 3.250211000  | 3.250211000  | 1.269434000  |
| C  | 3.250211000  | -3.250211000 | -1.269434000 |
| C  | 3.999354000  | 3.999354000  | 1.883157000  |
| C  | 3.999354000  | -3.999354000 | -1.883157000 |
| C  | 4.146754000  | 6.343694000  | 3.764646000  |
| C  | 4.146754000  | -6.343694000 | -3.764646000 |
| C  | 4.219655000  | 0.650570000  | 0.227352000  |
| C  | 4.219655000  | -0.650570000 | -0.227352000 |
| C  | 5.441882000  | 1.482193000  | 0.474890000  |
| C  | 5.441882000  | -1.482193000 | -0.474890000 |
| C  | 6.093676000  | 6.093676000  | 1.377604000  |
| C  | 6.093676000  | -6.093676000 | -1.377604000 |
| C  | 6.343694000  | 4.146754000  | 3.764646000  |
| C  | 6.343694000  | -4.146754000 | -3.764646000 |
| C  | -0.650570000 | 4.219655000  | -0.227352000 |
| C  | -0.650570000 | -4.219655000 | 0.227352000  |
| C  | -1.055597000 | 2.827864000  | -0.338511000 |
| C  | -1.055597000 | -2.827864000 | 0.338511000  |
| C  | -1.482193000 | 5.441882000  | -0.474890000 |
| C  | -1.482193000 | -5.441882000 | 0.474890000  |
| C  | -2.356147000 | 2.356147000  | -0.636155000 |
| C  | -2.356147000 | -2.356147000 | 0.636155000  |
| C  | -2.827864000 | 1.055597000  | -0.338511000 |
| C  | -2.827864000 | -1.055597000 | 0.338511000  |
| C  | -3.250211000 | 3.250211000  | -1.269434000 |
| C  | -3.250211000 | -3.250211000 | 1.269434000  |

|   |              |              |              |
|---|--------------|--------------|--------------|
| C | -3.999354000 | 3.999354000  | -1.883157000 |
| C | -3.999354000 | -3.999354000 | 1.883157000  |
| C | -4.146754000 | 6.343694000  | -3.764646000 |
| C | -4.146754000 | -6.343694000 | 3.764646000  |
| C | -4.219655000 | 0.650570000  | -0.227352000 |
| C | -4.219655000 | -0.650570000 | 0.227352000  |
| C | -5.441882000 | 1.482193000  | -0.474890000 |
| C | -5.441882000 | -1.482193000 | 0.474890000  |
| C | -6.093676000 | 6.093676000  | -1.377604000 |
| C | -6.093676000 | -6.093676000 | 1.377604000  |
| C | -6.343694000 | 4.146754000  | -3.764646000 |
| C | -6.343694000 | -4.146754000 | 3.764646000  |
| H | 0.966313000  | 6.338176000  | 0.113948000  |
| H | 0.966313000  | -6.338176000 | -0.113948000 |
| H | 1.701587000  | 5.576688000  | 1.542248000  |
| H | 1.701587000  | -5.576688000 | -1.542248000 |
| H | 2.449216000  | 5.381705000  | -0.039589000 |
| H | 2.449216000  | -5.381705000 | 0.039589000  |
| H | 3.445584000  | 6.916327000  | 3.140341000  |
| H | 3.445584000  | -6.916327000 | -3.140341000 |
| H | 3.562262000  | 5.800674000  | 4.520804000  |
| H | 3.562262000  | -5.800674000 | -4.520804000 |
| H | 4.804644000  | 7.057781000  | 4.283004000  |
| H | 4.804644000  | -7.057781000 | -4.283004000 |
| H | 5.381705000  | 2.449216000  | -0.039589000 |
| H | 5.381705000  | -2.449216000 | 0.039589000  |
| H | 5.401897000  | 6.659655000  | 0.737346000  |
| H | 5.401897000  | -6.659655000 | -0.737346000 |
| H | 5.576688000  | 1.701587000  | 1.542248000  |
| H | 5.576688000  | -1.701587000 | -1.542248000 |
| H | 5.800674000  | 3.562262000  | 4.520804000  |
| H | 5.800674000  | -3.562262000 | -4.520804000 |
| H | 6.338176000  | 0.966313000  | 0.113948000  |
| H | 6.338176000  | -0.966313000 | -0.113948000 |
| H | 6.659655000  | 5.401897000  | 0.737346000  |
| H | 6.659655000  | -5.401897000 | -0.737346000 |
| H | 6.803538000  | 6.803538000  | 1.829257000  |
| H | 6.803538000  | -6.803538000 | -1.829257000 |
| H | 6.916327000  | 3.445584000  | 3.140341000  |
| H | 6.916327000  | -3.445584000 | -3.140341000 |
| H | 7.057781000  | 4.804644000  | 4.283004000  |
| H | 7.057781000  | -4.804644000 | -4.283004000 |
| H | -0.966313000 | 6.338176000  | -0.113948000 |
| H | -0.966313000 | -6.338176000 | 0.113948000  |
| H | -1.701587000 | 5.576688000  | -1.542248000 |
| H | -1.701587000 | -5.576688000 | 1.542248000  |
| H | -2.449216000 | 5.381705000  | 0.039589000  |
| H | -2.449216000 | -5.381705000 | -0.039589000 |
| H | -3.445584000 | 6.916327000  | -3.140341000 |
| H | -3.445584000 | -6.916327000 | 3.140341000  |
| H | -3.562262000 | 5.800674000  | -4.520804000 |

|    |              |              |              |
|----|--------------|--------------|--------------|
| H  | -3.562262000 | -5.800674000 | 4.520804000  |
| H  | -4.804644000 | 7.057781000  | -4.283004000 |
| H  | -4.804644000 | -7.057781000 | 4.283004000  |
| H  | -5.381705000 | 2.449216000  | 0.039589000  |
| H  | -5.381705000 | -2.449216000 | -0.039589000 |
| H  | -5.401897000 | 6.659655000  | -0.737346000 |
| H  | -5.401897000 | -6.659655000 | 0.737346000  |
| H  | -5.576688000 | 1.701587000  | -1.542248000 |
| H  | -5.576688000 | -1.701587000 | 1.542248000  |
| H  | -5.800674000 | 3.562262000  | -4.520804000 |
| H  | -5.800674000 | -3.562262000 | 4.520804000  |
| H  | -6.338176000 | 0.966313000  | -0.113948000 |
| H  | -6.338176000 | -0.966313000 | 0.113948000  |
| H  | -6.659655000 | 5.401897000  | -0.737346000 |
| H  | -6.659655000 | -5.401897000 | 0.737346000  |
| H  | -6.803538000 | 6.803538000  | -1.829257000 |
| H  | -6.803538000 | -6.803538000 | 1.829257000  |
| H  | -6.916327000 | 3.445584000  | -3.140341000 |
| H  | -6.916327000 | -3.445584000 | 3.140341000  |
| H  | -7.057781000 | 4.804644000  | -4.283004000 |
| H  | -7.057781000 | -4.804644000 | 4.283004000  |
| N  | 0.000000000  | 2.016092000  | 0.000000000  |
| N  | 0.000000000  | -2.016092000 | 0.000000000  |
| N  | 2.016092000  | 0.000000000  | 0.000000000  |
| N  | -2.016092000 | 0.000000000  | 0.000000000  |
| Si | 5.151355000  | 5.151355000  | 2.709687000  |
| Si | 5.151355000  | -5.151355000 | -2.709687000 |
| Si | -5.151355000 | 5.151355000  | -2.709687000 |
| Si | -5.151355000 | -5.151355000 | 2.709687000  |

**107. Pt[A<sub>4</sub>Me<sub>8</sub>]; S = 0 (saddled)**

|    |             |              |              |
|----|-------------|--------------|--------------|
| Pt | 0.005007000 | 0.048972000  | 0.000000000  |
| C  | 0.590082000 | -0.955907000 | 4.069700000  |
| C  | 0.590082000 | -0.955907000 | -4.069700000 |
| C  | 1.067301000 | -0.459676000 | 2.792478000  |
| C  | 1.067301000 | -0.459676000 | -2.792478000 |
| C  | 1.398403000 | -1.562868000 | 5.176119000  |
| C  | 1.398403000 | -1.562868000 | -5.176119000 |
| C  | 2.406400000 | -0.211995000 | 2.413151000  |
| C  | 2.406400000 | -0.211995000 | -2.413151000 |
| C  | 2.820422000 | 0.146926000  | 1.109859000  |
| C  | 2.820422000 | 0.146926000  | -1.109859000 |
| C  | 3.409283000 | -0.344000000 | 3.403798000  |
| C  | 3.409283000 | -0.344000000 | -3.403798000 |
| C  | 4.145466000 | 0.560054000  | 0.688737000  |
| C  | 4.145466000 | 0.560054000  | -0.688737000 |
| C  | 4.278830000 | -0.467363000 | 4.256101000  |
| C  | 4.278830000 | -0.467363000 | -4.256101000 |
| C  | 5.113262000 | 0.330793000  | 7.041643000  |

|   |              |              |              |
|---|--------------|--------------|--------------|
| C | 5.113262000  | 0.330793000  | -7.041643000 |
| C | 5.295137000  | 0.970477000  | 1.557074000  |
| C | 5.295137000  | 0.970477000  | -1.557074000 |
| C | 5.649499000  | -2.515431000 | 5.976502000  |
| C | 5.649499000  | -2.515431000 | -5.976502000 |
| C | 7.208615000  | -0.105215000 | 4.799844000  |
| C | 7.208615000  | -0.105215000 | -4.799844000 |
| C | -0.779571000 | -0.808790000 | 4.069854000  |
| C | -0.779571000 | -0.808790000 | -4.069854000 |
| C | -1.140920000 | -0.222908000 | 2.792552000  |
| C | -1.140920000 | -0.222908000 | -2.792552000 |
| C | -1.697974000 | -1.229573000 | 5.176794000  |
| C | -1.697974000 | -1.229573000 | -5.176794000 |
| C | -2.397193000 | 0.302496000  | 2.413075000  |
| C | -2.397193000 | 0.302496000  | -2.413075000 |
| C | -2.725677000 | 0.741287000  | 1.109829000  |
| C | -2.725677000 | 0.741287000  | -1.109829000 |
| C | -3.405761000 | 0.384997000  | 3.403283000  |
| C | -3.405761000 | 0.384997000  | -3.403283000 |
| C | -3.933139000 | 1.425675000  | 0.688747000  |
| C | -3.933139000 | 1.425675000  | -0.688747000 |
| C | -4.282338000 | 0.446857000  | 4.255059000  |
| C | -4.282338000 | 0.446857000  | -4.255059000 |
| C | -4.917421000 | 1.381147000  | 7.049997000  |
| C | -4.917421000 | 1.381147000  | -7.049997000 |
| C | -4.969734000 | 2.070392000  | 1.557088000  |
| C | -4.969734000 | 2.070392000  | -1.557088000 |
| C | -6.067448000 | -1.267155000 | 5.961089000  |
| C | -6.067448000 | -1.267155000 | -5.961089000 |
| C | -7.060720000 | 1.437400000  | 4.811022000  |
| C | -7.060720000 | 1.437400000  | -4.811022000 |
| H | 0.749025000  | -2.116943000 | 5.863563000  |
| H | 0.749025000  | -2.116943000 | -5.863563000 |
| H | 1.930323000  | -0.798404000 | 5.758612000  |
| H | 1.930323000  | -0.798404000 | -5.758612000 |
| H | 2.157336000  | -2.253348000 | 4.791084000  |
| H | 2.157336000  | -2.253348000 | -4.791084000 |
| H | 4.144884000  | 0.005328000  | 7.448486000  |
| H | 4.144884000  | 0.005328000  | -7.448486000 |
| H | 4.681293000  | -2.857591000 | 6.369786000  |
| H | 4.681293000  | -2.857591000 | -6.369786000 |
| H | 4.965466000  | 1.583291000  | 2.403621000  |
| H | 4.965466000  | 1.583291000  | -2.403621000 |
| H | 5.032743000  | 1.397455000  | 6.788514000  |
| H | 5.032743000  | 1.397455000  | -6.788514000 |
| H | 5.818478000  | 0.102430000  | 1.979989000  |
| H | 5.818478000  | 0.102430000  | -1.979989000 |
| H | 5.871499000  | 0.218978000  | 7.831682000  |
| H | 5.871499000  | 0.218978000  | -7.831682000 |
| H | 5.892108000  | -3.125745000 | 5.095025000  |
| H | 5.892108000  | -3.125745000 | -5.095025000 |

|    |              |              |              |
|----|--------------|--------------|--------------|
| H  | 6.023129000  | 1.549991000  | 0.977566000  |
| H  | 6.023129000  | 1.549991000  | -0.977566000 |
| H  | 6.415855000  | -2.697241000 | 6.745472000  |
| H  | 6.415855000  | -2.697241000 | -6.745472000 |
| H  | 7.141879000  | 0.945218000  | 4.482513000  |
| H  | 7.141879000  | 0.945218000  | -4.482513000 |
| H  | 7.482454000  | -0.707918000 | 3.922057000  |
| H  | 7.482454000  | -0.707918000 | -3.922057000 |
| H  | 8.018412000  | -0.190340000 | 5.540253000  |
| H  | 8.018412000  | -0.190340000 | -5.540253000 |
| H  | -1.179986000 | -1.905840000 | 5.866425000  |
| H  | -1.179986000 | -1.905840000 | -5.866425000 |
| H  | -2.057641000 | -0.368837000 | 5.756773000  |
| H  | -2.057641000 | -0.368837000 | -5.756773000 |
| H  | -2.584908000 | -1.746094000 | 4.792605000  |
| H  | -2.584908000 | -1.746094000 | -4.792605000 |
| H  | -4.043451000 | 0.846815000  | 7.449865000  |
| H  | -4.043451000 | 0.846815000  | -7.449865000 |
| H  | -4.517807000 | 2.598044000  | 2.404567000  |
| H  | -4.517807000 | 2.598044000  | -2.404567000 |
| H  | -4.604946000 | 2.406539000  | 6.806515000  |
| H  | -4.604946000 | 2.406539000  | -6.806515000 |
| H  | -5.197419000 | -1.817267000 | 6.347884000  |
| H  | -5.197419000 | -1.817267000 | -6.347884000 |
| H  | -5.557260000 | 2.792263000  | 0.977954000  |
| H  | -5.557260000 | 2.792263000  | -0.977954000 |
| H  | -5.666149000 | 1.333137000  | 1.978696000  |
| H  | -5.666149000 | 1.333137000  | -1.978696000 |
| H  | -5.680172000 | 1.430664000  | 7.842056000  |
| H  | -5.680172000 | 1.430664000  | -7.842056000 |
| H  | -6.439465000 | -1.800895000 | 5.075057000  |
| H  | -6.439465000 | -1.800895000 | -5.075057000 |
| H  | -6.765438000 | 2.450503000  | 4.502840000  |
| H  | -6.765438000 | 2.450503000  | -4.502840000 |
| H  | -6.853849000 | -1.283493000 | 6.731141000  |
| H  | -6.853849000 | -1.283493000 | -6.731141000 |
| H  | -7.460826000 | 0.917673000  | 3.928664000  |
| H  | -7.460826000 | 0.917673000  | -3.928664000 |
| H  | -7.868837000 | 1.525017000  | 5.552968000  |
| H  | -7.868837000 | 1.525017000  | -5.552968000 |
| N  | 2.017365000  | -0.006602000 | 0.000000000  |
| N  | -0.011460000 | -0.104717000 | 2.010277000  |
| N  | -0.011460000 | -0.104717000 | -2.010277000 |
| N  | -1.973335000 | 0.421150000  | 0.000000000  |
| Si | 5.571912000  | -0.688391000 | 5.526571000  |
| Si | 5.571912000  | -0.688391000 | -5.526571000 |
| Si | -5.591179000 | 0.502433000  | 5.527336000  |
| Si | -5.591179000 | 0.502433000  | -5.527336000 |



108. Pt[A<sub>4</sub>Me<sub>8</sub>]; S = 0 (ruffled)

|    |              |              |              |
|----|--------------|--------------|--------------|
| Pt | 0.000000000  | 0.000000000  | 0.000000000  |
| C  | 0.650865000  | 0.225769000  | -4.218660000 |
| C  | 0.650865000  | -0.225769000 | 4.218660000  |
| C  | 1.057555000  | 0.337466000  | -2.830009000 |
| C  | 1.057555000  | -0.337466000 | 2.830009000  |
| C  | 1.483409000  | 0.470443000  | -5.440564000 |
| C  | 1.483409000  | -0.470443000 | 5.440564000  |
| C  | 2.357484000  | 0.635586000  | -2.357584000 |
| C  | 2.357484000  | -0.635586000 | 2.357584000  |
| C  | 2.829845000  | 0.337394000  | -1.057644000 |
| C  | 2.829845000  | -0.337394000 | 1.057644000  |
| C  | 3.250755000  | 1.272513000  | -3.250542000 |
| C  | 3.250755000  | -1.272513000 | 3.250542000  |
| C  | 3.998386000  | 1.891006000  | -3.997300000 |
| C  | 3.998386000  | -1.891006000 | 3.997300000  |
| C  | 4.140989000  | 3.756043000  | -6.354620000 |
| C  | 4.140989000  | -3.756043000 | 6.354620000  |
| C  | 4.218446000  | 0.225803000  | -0.650854000 |
| C  | 4.218446000  | -0.225803000 | 0.650854000  |
| C  | 5.440391000  | 0.470093000  | -1.483356000 |
| C  | 5.440391000  | -0.470093000 | 1.483356000  |
| C  | 6.118770000  | 1.397965000  | -6.067836000 |
| C  | 6.118770000  | -1.397965000 | 6.067836000  |
| C  | 6.318130000  | 3.803912000  | -4.138704000 |
| C  | 6.318130000  | -3.803912000 | 4.138704000  |
| C  | -0.650865000 | 0.225769000  | 4.218660000  |
| C  | -0.650865000 | -0.225769000 | -4.218660000 |
| C  | -1.057555000 | 0.337466000  | 2.830009000  |
| C  | -1.057555000 | -0.337466000 | -2.830009000 |
| C  | -1.483409000 | 0.470443000  | 5.440564000  |
| C  | -1.483409000 | -0.470443000 | -5.440564000 |
| C  | -2.357484000 | 0.635586000  | 2.357584000  |
| C  | -2.357484000 | -0.635586000 | -2.357584000 |
| C  | -2.829845000 | 0.337394000  | 1.057644000  |
| C  | -2.829845000 | -0.337394000 | -1.057644000 |
| C  | -3.250755000 | 1.272513000  | 3.250542000  |
| C  | -3.250755000 | -1.272513000 | -3.250542000 |
| C  | -3.998386000 | 1.891006000  | 3.997300000  |
| C  | -3.998386000 | -1.891006000 | -3.997300000 |
| C  | -4.140989000 | 3.756043000  | 6.354620000  |
| C  | -4.140989000 | -3.756043000 | -6.354620000 |
| C  | -4.218446000 | 0.225803000  | 0.650854000  |
| C  | -4.218446000 | -0.225803000 | -0.650854000 |
| C  | -5.440391000 | 0.470093000  | 1.483356000  |
| C  | -5.440391000 | -0.470093000 | -1.483356000 |
| C  | -6.118770000 | 1.397965000  | 6.067836000  |
| C  | -6.118770000 | -1.397965000 | -6.067836000 |
| C  | -6.318130000 | 3.803912000  | 4.138704000  |
| C  | -6.318130000 | -3.803912000 | -4.138704000 |

|   |              |              |              |
|---|--------------|--------------|--------------|
| H | 0.969098000  | 0.105737000  | -6.336166000 |
| H | 0.969098000  | -0.105737000 | 6.336166000  |
| H | 1.701843000  | 1.537566000  | -5.578637000 |
| H | 1.701843000  | -1.537566000 | 5.578637000  |
| H | 2.450766000  | 0.042758000  | 5.377153000  |
| H | 2.450766000  | -0.042758000 | -5.377153000 |
| H | 3.452572000  | 3.117765000  | -6.927356000 |
| H | 3.452572000  | -3.117765000 | 6.927356000  |
| H | 3.542440000  | 4.509194000  | -5.822782000 |
| H | 3.542440000  | -4.509194000 | 5.822782000  |
| H | 4.797749000  | 4.276820000  | -7.067950000 |
| H | 4.797749000  | -4.276820000 | 7.067950000  |
| H | 5.376796000  | 0.043070000  | 2.450720000  |
| H | 5.376796000  | -0.043070000 | -2.450720000 |
| H | 5.441425000  | 0.745355000  | -6.637127000 |
| H | 5.441425000  | -0.745355000 | 6.637127000  |
| H | 5.578886000  | 1.537175000  | -1.701730000 |
| H | 5.578886000  | -1.537175000 | 1.701730000  |
| H | 5.759456000  | 4.556455000  | -3.564413000 |
| H | 5.759456000  | -4.556455000 | 3.564413000  |
| H | 6.335745000  | 0.105075000  | -0.968962000 |
| H | 6.335745000  | -0.105075000 | 0.968962000  |
| H | 6.684754000  | 0.769560000  | -5.365257000 |
| H | 6.684754000  | -0.769560000 | 5.365257000  |
| H | 6.831000000  | 1.853669000  | -6.772677000 |
| H | 6.831000000  | -1.853669000 | 6.772677000  |
| H | 6.893874000  | 3.193245000  | -3.428118000 |
| H | 6.893874000  | -3.193245000 | 3.428118000  |
| H | 7.030166000  | 4.327569000  | -4.794607000 |
| H | 7.030166000  | -4.327569000 | 4.794607000  |
| H | -0.969098000 | 0.105737000  | 6.336166000  |
| H | -0.969098000 | -0.105737000 | -6.336166000 |
| H | -1.701843000 | 1.537566000  | 5.578637000  |
| H | -1.701843000 | -1.537566000 | -5.578637000 |
| H | -2.450766000 | 0.042758000  | -5.377153000 |
| H | -2.450766000 | -0.042758000 | 5.377153000  |
| H | -3.452572000 | 3.117765000  | 6.927356000  |
| H | -3.452572000 | -3.117765000 | -6.927356000 |
| H | -3.542440000 | 4.509194000  | 5.822782000  |
| H | -3.542440000 | -4.509194000 | -5.822782000 |
| H | -4.797749000 | 4.276820000  | 7.067950000  |
| H | -4.797749000 | -4.276820000 | -7.067950000 |
| H | -5.376796000 | 0.043070000  | -2.450720000 |
| H | -5.376796000 | -0.043070000 | 2.450720000  |
| H | -5.441425000 | 0.745355000  | 6.637127000  |
| H | -5.441425000 | -0.745355000 | -6.637127000 |
| H | -5.578886000 | 1.537175000  | 1.701730000  |
| H | -5.578886000 | -1.537175000 | -1.701730000 |
| H | -5.759456000 | 4.556455000  | 3.564413000  |
| H | -5.759456000 | -4.556455000 | -3.564413000 |
| H | -6.335745000 | 0.105075000  | 0.968962000  |

|    |              |              |              |
|----|--------------|--------------|--------------|
| H  | -6.335745000 | -0.105075000 | -0.968962000 |
| H  | -6.684754000 | 0.769560000  | 5.365257000  |
| H  | -6.684754000 | -0.769560000 | -5.365257000 |
| H  | -6.831000000 | 1.853669000  | 6.772677000  |
| H  | -6.831000000 | -1.853669000 | -6.772677000 |
| H  | -6.893874000 | 3.193245000  | 3.428118000  |
| H  | -6.893874000 | -3.193245000 | -3.428118000 |
| H  | -7.030166000 | 4.327569000  | 4.794607000  |
| H  | -7.030166000 | -4.327569000 | -4.794607000 |
| N  | 0.000000000  | 0.000000000  | 2.016066000  |
| N  | 0.000000000  | 0.000000000  | -2.016066000 |
| N  | 2.016011000  | 0.000000000  | 0.000000000  |
| N  | -2.016011000 | 0.000000000  | 0.000000000  |
| Si | 5.149476000  | 2.724532000  | -5.145146000 |
| Si | 5.149476000  | -2.724532000 | 5.145146000  |
| Si | -5.149476000 | 2.724532000  | 5.145146000  |
| Si | -5.149476000 | -2.724532000 | -5.145146000 |

**109. Zn[A<sub>4</sub>Me<sub>8</sub>]; S = 0 (saddled)**

|    |              |              |              |
|----|--------------|--------------|--------------|
| Zn | 0.009160000  | 0.074872000  | 0.000000000  |
| C  | 0.597562000  | -0.909611000 | 4.098546000  |
| C  | 0.597562000  | -0.909611000 | -4.098546000 |
| C  | 1.066870000  | -0.424955000 | 2.810844000  |
| C  | 1.066870000  | -0.424955000 | -2.810844000 |
| C  | 1.405215000  | -1.499671000 | 5.214656000  |
| C  | 1.405215000  | -1.499671000 | -5.214656000 |
| C  | 2.411550000  | -0.188072000 | 2.415557000  |
| C  | 2.411550000  | -0.188072000 | -2.415557000 |
| C  | 2.833406000  | 0.168814000  | 1.105174000  |
| C  | 2.833406000  | 0.168814000  | -1.105174000 |
| C  | 3.418378000  | -0.336208000 | 3.397941000  |
| C  | 3.418378000  | -0.336208000 | -3.397941000 |
| C  | 4.165167000  | 0.573259000  | 0.690547000  |
| C  | 4.165167000  | 0.573259000  | -0.690547000 |
| C  | 4.292699000  | -0.479212000 | 4.243213000  |
| C  | 4.292699000  | -0.479212000 | -4.243213000 |
| C  | 5.140302000  | 0.272501000  | 7.037070000  |
| C  | 5.140302000  | 0.272501000  | -7.037070000 |
| C  | 5.321029000  | 0.972899000  | 1.555900000  |
| C  | 5.321029000  | 0.972899000  | -1.555900000 |
| C  | 5.640186000  | -2.565559000 | 5.936193000  |
| C  | 5.640186000  | -2.565559000 | -5.936193000 |
| C  | 7.228906000  | -0.161830000 | 4.788007000  |
| C  | 7.228906000  | -0.161830000 | -4.788007000 |
| C  | -0.775510000 | -0.761603000 | 4.098638000  |
| C  | -0.775510000 | -0.761603000 | -4.098638000 |
| C  | -1.131048000 | -0.188603000 | 2.810792000  |
| C  | -1.131048000 | -0.188603000 | -2.810792000 |
| C  | -1.690126000 | -1.164865000 | 5.215300000  |

|   |              |              |              |
|---|--------------|--------------|--------------|
| C | -1.690126000 | -1.164865000 | -5.215300000 |
| C | -2.394578000 | 0.328475000  | 2.415350000  |
| C | -2.394578000 | 0.328475000  | -2.415350000 |
| C | -2.730361000 | 0.767807000  | 1.105117000  |
| C | -2.730361000 | 0.767807000  | -1.105117000 |
| C | -3.411336000 | 0.395042000  | 3.396403000  |
| C | -3.411336000 | 0.395042000  | -3.396403000 |
| C | -3.945286000 | 1.446765000  | 0.690544000  |
| C | -3.945286000 | 1.446765000  | -0.690544000 |
| C | -4.298084000 | 0.438205000  | 4.239675000  |
| C | -4.298084000 | 0.438205000  | -4.239675000 |
| C | -4.966128000 | 1.327959000  | 7.041295000  |
| C | -4.966128000 | 1.327959000  | -7.041295000 |
| C | -4.989157000 | 2.083849000  | 1.555963000  |
| C | -4.989157000 | 2.083849000  | -1.555963000 |
| C | -6.073224000 | -1.320342000 | 5.911215000  |
| C | -6.073224000 | -1.320342000 | -5.911215000 |
| C | -7.095006000 | 1.383849000  | 4.788142000  |
| C | -7.095006000 | 1.383849000  | -4.788142000 |
| H | 0.756130000  | -2.027624000 | 5.922757000  |
| H | 0.756130000  | -2.027624000 | -5.922757000 |
| H | 1.952382000  | -0.726755000 | 5.771502000  |
| H | 1.952382000  | -0.726755000 | -5.771502000 |
| H | 2.153320000  | -2.208519000 | 4.841309000  |
| H | 2.153320000  | -2.208519000 | -4.841309000 |
| H | 4.168618000  | -0.047320000 | 7.440599000  |
| H | 4.168618000  | -0.047320000 | -7.440599000 |
| H | 4.668029000  | -2.900209000 | 6.326219000  |
| H | 4.668029000  | -2.900209000 | -6.326219000 |
| H | 4.997960000  | 1.578120000  | 2.410482000  |
| H | 4.997960000  | 1.578120000  | -2.410482000 |
| H | 5.071737000  | 1.343306000  | 6.798261000  |
| H | 5.071737000  | 1.343306000  | -6.798261000 |
| H | 5.841719000  | 0.098092000  | 1.968673000  |
| H | 5.841719000  | 0.098092000  | -1.968673000 |
| H | 5.874579000  | -3.168450000 | 5.047404000  |
| H | 5.874579000  | -3.168450000 | -5.047404000 |
| H | 5.897904000  | 0.141368000  | 7.824759000  |
| H | 5.897904000  | 0.141368000  | -7.824759000 |
| H | 6.050026000  | 1.554389000  | 0.979121000  |
| H | 6.050026000  | 1.554389000  | -0.979121000 |
| H | 6.404697000  | -2.765864000 | 6.702428000  |
| H | 6.404697000  | -2.765864000 | -6.702428000 |
| H | 7.176087000  | 0.892904000  | 4.482587000  |
| H | 7.176087000  | 0.892904000  | -4.482587000 |
| H | 7.494976000  | -0.758143000 | 3.903491000  |
| H | 7.494976000  | -0.758143000 | -3.903491000 |
| H | 8.037394000  | -0.266067000 | 5.527411000  |
| H | 8.037394000  | -0.266067000 | -5.527411000 |
| H | -1.167754000 | -1.816271000 | 5.925408000  |
| H | -1.167754000 | -1.816271000 | -5.925408000 |

|    |              |              |              |
|----|--------------|--------------|--------------|
| H  | -2.061676000 | -0.292251000 | 5.769705000  |
| H  | -2.061676000 | -0.292251000 | -5.769705000 |
| H  | -2.571076000 | -1.700385000 | 4.842921000  |
| H  | -2.571076000 | -1.700385000 | -4.842921000 |
| H  | -4.088565000 | 0.799132000  | 7.440713000  |
| H  | -4.088565000 | 0.799132000  | -7.440713000 |
| H  | -4.544489000 | 2.604044000  | 2.411913000  |
| H  | -4.544489000 | 2.604044000  | -2.411913000 |
| H  | -4.664624000 | 2.360253000  | 6.813706000  |
| H  | -4.664624000 | 2.360253000  | -6.813706000 |
| H  | -5.199225000 | -1.863546000 | 6.298824000  |
| H  | -5.199225000 | -1.863546000 | -6.298824000 |
| H  | -5.575638000 | 2.809370000  | 0.979831000  |
| H  | -5.575638000 | 2.809370000  | -0.979831000 |
| H  | -5.686020000 | 1.340580000  | 1.966730000  |
| H  | -5.686020000 | 1.340580000  | -1.966730000 |
| H  | -5.735291000 | 1.357479000  | 7.828142000  |
| H  | -5.735291000 | 1.357479000  | -7.828142000 |
| H  | -6.430993000 | -1.848510000 | 5.016009000  |
| H  | -6.430993000 | -1.848510000 | -5.016009000 |
| H  | -6.812376000 | 2.404545000  | 4.493474000  |
| H  | -6.812376000 | 2.404545000  | -4.493474000 |
| H  | -6.865580000 | -1.355943000 | 6.674520000  |
| H  | -6.865580000 | -1.355943000 | -6.674520000 |
| H  | -7.482975000 | 0.868898000  | 3.897572000  |
| H  | -7.482975000 | 0.868898000  | -3.897572000 |
| H  | -7.908390000 | 1.451350000  | 5.526434000  |
| H  | -7.908390000 | 1.451350000  | -5.526434000 |
| N  | 2.032407000  | 0.017309000  | 0.000000000  |
| N  | -0.006832000 | -0.072276000 | 2.031591000  |
| N  | -0.006832000 | -0.072276000 | -2.031591000 |
| N  | -1.979992000 | 0.449119000  | 0.000000000  |
| Si | 5.584723000  | -0.732302000 | 5.507955000  |
| Si | 5.584723000  | -0.732302000 | -5.507955000 |
| Si | -5.616827000 | 0.460532000  | 5.501967000  |
| Si | -5.616827000 | 0.460532000  | -5.501967000 |

**110. Zn[A<sub>4</sub>Me<sub>8</sub>]; S = 0 (ruffled)**

|    |             |              |              |
|----|-------------|--------------|--------------|
| Zn | 0.000000000 | 0.000000000  | 0.000000000  |
| C  | 0.668261000 | 4.255504000  | 0.170982000  |
| C  | 0.668261000 | -4.255504000 | -0.170982000 |
| C  | 1.074281000 | 2.862822000  | 0.258615000  |
| C  | 1.074281000 | -2.862822000 | -0.258615000 |
| C  | 1.510933000 | 5.484847000  | 0.334476000  |
| C  | 1.510933000 | -5.484847000 | -0.334476000 |
| C  | 2.391094000 | 2.391094000  | 0.505906000  |
| C  | 2.391094000 | -2.391094000 | -0.505906000 |
| C  | 2.862822000 | 1.074281000  | 0.258615000  |
| C  | 2.862822000 | -1.074281000 | -0.258615000 |

|   |              |              |              |
|---|--------------|--------------|--------------|
| C | 3.309243000  | 3.309243000  | 1.067765000  |
| C | 3.309243000  | -3.309243000 | -1.067765000 |
| C | 4.081718000  | 4.081718000  | 1.621345000  |
| C | 4.081718000  | -4.081718000 | -1.621345000 |
| C | 4.255504000  | 0.668261000  | 0.170982000  |
| C | 4.255504000  | -0.668261000 | -0.170982000 |
| C | 4.306099000  | 6.502738000  | 3.396147000  |
| C | 4.306099000  | -6.502738000 | -3.396147000 |
| C | 5.484847000  | 1.510933000  | 0.334476000  |
| C | 5.484847000  | -1.510933000 | -0.334476000 |
| C | 6.151809000  | 6.151809000  | 0.943165000  |
| C | 6.151809000  | -6.151809000 | -0.943165000 |
| C | 6.502738000  | 4.306099000  | 3.396147000  |
| C | 6.502738000  | -4.306099000 | -3.396147000 |
| C | -0.668261000 | 4.255504000  | -0.170982000 |
| C | -0.668261000 | -4.255504000 | 0.170982000  |
| C | -1.074281000 | 2.862822000  | -0.258615000 |
| C | -1.074281000 | -2.862822000 | 0.258615000  |
| C | -1.510933000 | 5.484847000  | -0.334476000 |
| C | -1.510933000 | -5.484847000 | 0.334476000  |
| C | -2.391094000 | 2.391094000  | -0.505906000 |
| C | -2.391094000 | -2.391094000 | 0.505906000  |
| C | -2.862822000 | 1.074281000  | -0.258615000 |
| C | -2.862822000 | -1.074281000 | 0.258615000  |
| C | -3.309243000 | 3.309243000  | -1.067765000 |
| C | -3.309243000 | -3.309243000 | 1.067765000  |
| C | -4.081718000 | 4.081718000  | -1.621345000 |
| C | -4.081718000 | -4.081718000 | 1.621345000  |
| C | -4.255504000 | 0.668261000  | -0.170982000 |
| C | -4.255504000 | -0.668261000 | 0.170982000  |
| C | -4.306099000 | 6.502738000  | -3.396147000 |
| C | -4.306099000 | -6.502738000 | 3.396147000  |
| C | -5.484847000 | 1.510933000  | -0.334476000 |
| C | -5.484847000 | -1.510933000 | 0.334476000  |
| C | -6.151809000 | 6.151809000  | -0.943165000 |
| C | -6.151809000 | -6.151809000 | 0.943165000  |
| C | -6.502738000 | 4.306099000  | -3.396147000 |
| C | -6.502738000 | -4.306099000 | 3.396147000  |
| H | 0.976097000  | 6.369491000  | -0.028073000 |
| H | 0.976097000  | -6.369491000 | 0.028073000  |
| H | 1.787248000  | 5.654707000  | 1.383627000  |
| H | 1.787248000  | -5.654707000 | -1.383627000 |
| H | 2.448899000  | 5.406472000  | -0.228119000 |
| H | 2.448899000  | -5.406472000 | 0.228119000  |
| H | 3.581486000  | 7.052200000  | 2.777816000  |
| H | 3.581486000  | -7.052200000 | -2.777816000 |
| H | 3.751504000  | 5.992606000  | 4.196430000  |
| H | 3.751504000  | -5.992606000 | -4.196430000 |
| H | 4.985431000  | 7.234980000  | 3.858489000  |
| H | 4.985431000  | -7.234980000 | -3.858489000 |
| H | 5.406472000  | 2.448899000  | -0.228119000 |

|   |              |              |              |
|---|--------------|--------------|--------------|
| H | 5.406472000  | -2.448899000 | 0.228119000  |
| H | 5.433826000  | 6.691557000  | 0.309114000  |
| H | 5.433826000  | -6.691557000 | -0.309114000 |
| H | 5.654707000  | 1.787248000  | 1.383627000  |
| H | 5.654707000  | -1.787248000 | -1.383627000 |
| H | 5.992606000  | 3.751504000  | 4.196430000  |
| H | 5.992606000  | -3.751504000 | -4.196430000 |
| H | 6.369491000  | 0.976097000  | -0.028073000 |
| H | 6.369491000  | -0.976097000 | 0.028073000  |
| H | 6.691557000  | 5.433826000  | 0.309114000  |
| H | 6.691557000  | -5.433826000 | -0.309114000 |
| H | 6.879069000  | 6.879069000  | 1.335654000  |
| H | 6.879069000  | -6.879069000 | -1.335654000 |
| H | 7.052200000  | 3.581486000  | 2.777816000  |
| H | 7.052200000  | -3.581486000 | -2.777816000 |
| H | 7.234980000  | 4.985431000  | 3.858489000  |
| H | 7.234980000  | -4.985431000 | -3.858489000 |
| H | -0.976097000 | 6.369491000  | 0.028073000  |
| H | -0.976097000 | -6.369491000 | -0.028073000 |
| H | -1.787248000 | 5.654707000  | -1.383627000 |
| H | -1.787248000 | -5.654707000 | 1.383627000  |
| H | -2.448899000 | 5.406472000  | 0.228119000  |
| H | -2.448899000 | -5.406472000 | -0.228119000 |
| H | -3.581486000 | 7.052200000  | -2.777816000 |
| H | -3.581486000 | -7.052200000 | 2.777816000  |
| H | -3.751504000 | 5.992606000  | -4.196430000 |
| H | -3.751504000 | -5.992606000 | 4.196430000  |
| H | -4.985431000 | 7.234980000  | -3.858489000 |
| H | -4.985431000 | -7.234980000 | 3.858489000  |
| H | -5.406472000 | 2.448899000  | 0.228119000  |
| H | -5.406472000 | -2.448899000 | -0.228119000 |
| H | -5.433826000 | 6.691557000  | -0.309114000 |
| H | -5.433826000 | -6.691557000 | 0.309114000  |
| H | -5.654707000 | 1.787248000  | -1.383627000 |
| H | -5.654707000 | -1.787248000 | 1.383627000  |
| H | -5.992606000 | 3.751504000  | -4.196430000 |
| H | -5.992606000 | -3.751504000 | 4.196430000  |
| H | -6.369491000 | 0.976097000  | 0.028073000  |
| H | -6.369491000 | -0.976097000 | -0.028073000 |
| H | -6.691557000 | 5.433826000  | -0.309114000 |
| H | -6.691557000 | -5.433826000 | 0.309114000  |
| H | -6.879069000 | 6.879069000  | -1.335654000 |
| H | -6.879069000 | -6.879069000 | 1.335654000  |
| H | -7.052200000 | 3.581486000  | -2.777816000 |
| H | -7.052200000 | -3.581486000 | 2.777816000  |
| H | -7.234980000 | 4.985431000  | -3.858489000 |
| H | -7.234980000 | -4.985431000 | 3.858489000  |
| N | 0.000000000  | 2.046561000  | 0.000000000  |
| N | 0.000000000  | -2.046561000 | 0.000000000  |
| N | 2.046561000  | 0.000000000  | 0.000000000  |
| N | -2.046561000 | 0.000000000  | 0.000000000  |

|    |              |              |              |
|----|--------------|--------------|--------------|
| Si | 5.265731000  | 5.265731000  | 2.350414000  |
| Si | 5.265731000  | -5.265731000 | -2.350414000 |
| Si | -5.265731000 | 5.265731000  | -2.350414000 |
| Si | -5.265731000 | -5.265731000 | 2.350414000  |
